# Supplementary material
Source: Research Square preprint supplement (doi:10.21203/rs.3.rs-6831916/v3)
Supplement: Supplementary file 1 [file 0a92c72a4bdded8516e72933.xlsx]

## Sheet: Estrus_cluster.4.25vsOth.deg
	p_val	avg_log2FC	pct.1	pct.2	p_val_adj
Sox1ot	1.15173828140229e-80	7.34162	0.095	0.001	2.8025247601362e-76
Gm37381	3.59977273267734e-21	5.77701	0.025	0	8.75932699042378e-17
Cldn22	1.42027239425766e-32	5.6307	0.04	0.001	3.45594881694717e-28
Slc13a5	2.13656422909111e-172	5.55577	0.249	0.008	5.19890173864739e-168
Col28a1	5.92189561182883e-21	5.50227	0.034	0.002	1.44097485922631e-16
Gria1	3.3092726715086e-49	5.46475	0.078	0.003	8.05245319158186e-45
Tekt1	1.65483691566213e-19	5.46232	0.023	0	4.02671466688067e-15
Rtn1	5.32528586950269e-17	5.4051	0.03	0.002	1.29580181062609e-12
Lrp2	0	5.38798	0.795	0.031	0
Gm56832	2.77555181179164e-29	5.36153	0.038	0.001	6.75375022363259e-25
Mmp10	1.42783569194479e-39	5.23104	0.057	0.002	3.47435258920926e-35
Nkain3	0	5.1661	0.848	0.044	0
Far2os2	1.07508093949357e-128	5.14713	0.209	0.01	2.61599445006971e-124
Sv2c	2.39832241787762e-69	5.1365	0.108	0.004	5.83583793942162e-65
Grin2b	4.42873036579482e-68	5.13022	0.101	0.003	1.07764295990885e-63
Kcnd3	4.12317011886627e-180	5.11648	0.294	0.014	1.00329098502373e-175
Cyp26a1	8.34436564459579e-90	5.09303	0.144	0.006	2.03043449229949e-85
Sult1a1	5.49268445164281e-108	4.9779	0.173	0.008	1.33653490761825e-103
Far2os1	8.52637827018947e-152	4.97017	0.249	0.012	2.0747236244852e-147
Slc16a12	1.98533748770762e-257	4.90849	0.393	0.016	4.83092170883894e-253
Gm6209	4.18883850594118e-17	4.86482	0.027	0.001	1.01927007365067e-12
Mt3	8.80973153674697e-68	4.85622	0.099	0.003	2.14367197483664e-63
Slc2a12	4.0604637061334e-255	4.8555	0.455	0.031	9.8803263361344e-251
Gm42864	1.8313513753224e-11	4.83038	0.011	0	4.45622730157199e-07
Sez6l	3.71119495788024e-305	4.82453	0.49	0.024	9.03045069100998e-301
Mme	0	4.81806	0.769	0.045	0
Gm47604	1.8313513753224e-11	4.81351	0.011	0	4.45622730157199e-07
Acbd7	3.57653716754077e-12	4.80375	0.019	0.001	8.70278788977696e-08
Susd2	2.04100435928882e-58	4.80206	0.099	0.005	4.96637590745748e-54
Gm13003	6.01629053547161e-21	4.79796	0.034	0.002	1.46394397599631e-16
Mgat3	3.54108391450709e-51	4.79075	0.082	0.004	8.6165194891701e-47
Dnah14	0	4.78983	0.854	0.065	0
Adra2c	4.58469382172226e-147	4.7777	0.239	0.011	1.11559354763968e-142
Cdh16	3.00674525549429e-43	4.76076	0.065	0.002	7.31631323019426e-39
Prdm5	1.85777349983336e-19	4.73395	0.032	0.002	4.52052025714453e-15
Cbs	1.06195885823129e-86	4.72898	0.176	0.014	2.58406448973421e-82
Tgfbi	0	4.72615	0.827	0.046	0
Gm47134	1.8313513753224e-11	4.71436	0.011	0	4.45622730157199e-07
Ube2ql1	3.51256946424701e-61	4.67014	0.097	0.004	8.54713527735225e-57
Gpr176	1.18189681989558e-09	4.6676	0.011	0	2.87590953185191e-05
Dok5	8.18808201094811e-30	4.66247	0.044	0.002	1.992405995724e-25
9530059O14Rik	0	4.64486	0.611	0.044	0
Gm29904	0	4.62616	0.579	0.034	0
Clec14a	4.00823285614637e-34	4.62321	0.059	0.003	9.75323300886097e-30
Topaz1	4.83919123352648e-64	4.61796	0.114	0.007	1.177520402854e-59
Slc1a3	1.1647248333613e-56	4.61502	0.101	0.006	2.83412493701805e-52
9530014B07Rik	1.09475255129621e-306	4.60946	0.51	0.029	2.66386138306906e-302
Cldn8	2.14147415824313e-63	4.60587	0.106	0.005	5.210849069253e-59
Gm32342	3.73373861885942e-51	4.59503	0.082	0.004	9.08530618127062e-47
Slc5a11	3.96991976423425e-85	4.57225	0.156	0.01	9.66000576231121e-81
Tmem100	1.56227080725302e-110	4.56398	0.199	0.012	3.80147355528876e-106
Klhl31	3.18394898911275e-53	4.55789	0.091	0.005	7.74750307520805e-49
Fn3k	3.32417823390497e-15	4.55557	0.023	0.001	8.08872289656097e-11
Clec10a	1.09351829403023e-13	4.51954	0.021	0.001	2.66085806486376e-09
Gulo	1.03750815471029e-127	4.50273	0.222	0.012	2.52456859285654e-123
Cpxm1	2.436652158429e-48	4.48534	0.087	0.005	5.92910569710528e-44
Sptlc3	8.40818949903544e-137	4.46149	0.216	0.009	2.04596475080029e-132
Ckb	0	4.44418	0.715	0.061	0
Gm36569	2.07230990739472e-35	4.42072	0.07	0.005	5.04255169766357e-31
Lrrc7	8.40011280158829e-20	4.41134	0.04	0.003	2.04399944801048e-15
Prr16	5.34994153458379e-251	4.40694	0.491	0.04	1.30180127361027e-246
Ccn4	2.65375358983959e-08	4.39274	0.011	0.001	0.000645738
ENSMUSG00000121444	3.51274002261956e-58	4.36306	0.102	0.006	8.54755029704017e-54
Paqr6	4.45347020355666e-33	4.317	0.059	0.004	1.08366290463144e-28
Gm41177	3.11212273779466e-10	4.3122	0.015	0.001	7.57272825787575e-06
Aox4	5.81361827398475e-21	4.30454	0.034	0.002	1.41462773460871e-16
Pla2g10os	5.67271782412394e-58	4.29398	0.093	0.004	1.38034242814408e-53
Nwd1	8.28509600698461e-73	4.27222	0.114	0.005	2.01601241137956e-68
Col9a2	4.20441168665484e-33	4.26985	0.059	0.004	1.02305949571372e-28
Rmst	0	4.26653	0.903	0.157	0
Pde3a	1.37364646314386e-44	4.26497	0.095	0.008	3.34249393876796e-40
Lingo4	9.93099570495956e-09	4.24548	0.013	0.001	0.000241651
Clvs2	9.98244845968278e-09	4.24525	0.013	0.001	0.000242903
Mcoln2	1.7784677738118e-61	4.23769	0.123	0.009	4.32754563401626e-57
Ndp	7.38676943478916e-18	4.2178	0.023	0.001	1.79742260656725e-13
Arl4d	5.07296556775841e-29	4.20396	0.065	0.006	1.23440471160265e-24
Rp1	5.37892571584862e-172	4.19036	0.353	0.03	1.30885399443744e-167
4930426D05Rik	8.60492573846119e-52	4.18889	0.093	0.006	2.09383657993976e-47
Nsg2	5.08957619828388e-57	4.18708	0.087	0.003	1.23844657632842e-52
Tet1	6.77879771266569e-97	4.16315	0.182	0.012	1.64948484742294e-92
Dclk1	3.6196683042495e-68	4.16291	0.129	0.009	8.80773888473032e-64
Slco4c1	2.95769313710939e-89	4.12711	0.178	0.013	7.19695471052828e-85
Wfdc6a	7.29689736791618e-10	4.12644	0.013	0.001	1.77555403653504e-05
4930473H19Rik	1.00861324488546e-08	4.11662	0.013	0.001	0.000245426
Far2	2.11850180779934e-98	4.10677	0.203	0.016	5.15495044891812e-94
Ihh	1.93439636074122e-112	4.08172	0.199	0.011	4.70696666459162e-108
Ggt6	7.85031795345121e-49	4.07849	0.085	0.005	1.91021786761328e-44
Wnt11	7.67775589495208e-175	4.07	0.37	0.034	1.86822834191869e-170
Gm3854	8.57367902429255e-08	4.06792	0.013	0.001	0.00208623
Adcy8	1.81192938139808e-100	4.05538	0.167	0.008	4.40896776375594e-96
Crybb1	5.74837768258619e-24	4.04908	0.038	0.002	1.3987527415037e-19
Npl	3.2430111951327e-103	4.04571	0.199	0.014	7.89121914111639e-99
Cntn4	1.68680150419762e-38	4.04549	0.065	0.003	4.10449410016406e-34
Pla2g10	6.69450652511063e-81	4.03989	0.148	0.009	1.62897427275517e-76
Pkhd1l1	1.04074288223458e-218	4.03403	0.416	0.03	2.5324396553414e-214
Tmod2	6.32889228578999e-24	4.02586	0.046	0.003	1.54000935990128e-19
Matn4	3.12890282852305e-16	4.02126	0.021	0.001	7.61355925264514e-12
Nsg1	3.96545723323047e-31	4.01195	0.055	0.003	9.64914708561971e-27
Klhl14	6.66599940773467e-53	3.98645	0.131	0.014	1.62203763588408e-48
Rdh12	1.29960864283779e-57	3.98183	0.123	0.011	3.1623377106172e-53
Gm29260	8.50515636127231e-26	3.97548	0.061	0.006	2.06955969738839e-21
Gxylt2	1.52460253938844e-45	3.96524	0.106	0.011	3.7098153590939e-41
9330185C12Rik	6.64430764689868e-142	3.96357	0.313	0.03	1.61675937971986e-137
Cyp4x1	2.08918707276379e-22	3.95347	0.036	0.002	5.08361890415614e-18
Rab40b	3.16730928271669e-108	3.94857	0.214	0.016	7.70701367763451e-104
Nhs	2.34151416595175e-232	3.94396	0.455	0.036	5.69760642001038e-228
Gm35254	1.27531895546015e-17	3.93897	0.042	0.005	3.10323361432119e-13
Gm47136	4.93722321841551e-22	3.93856	0.034	0.002	1.20137452573705e-17
Gm57064	1.65326058856228e-47	3.93412	0.091	0.006	4.0228789901486e-43
Fndc5	0	3.92534	0.723	0.082	0
Vit	4.08515990197323e-18	3.90605	0.034	0.003	9.94041958947147e-14
Them5	1.07045442778003e-60	3.90186	0.123	0.01	2.60473675911715e-56
Igdcc3	3.92513226487696e-107	3.89616	0.222	0.018	9.5510243401251e-103
Bambi	2.9172495575869e-204	3.89466	0.507	0.066	7.0985433484762e-200
Chst9	1.67990072650842e-307	3.88011	0.607	0.052	4.08770243781294e-303
Rragb	1.1437741421857e-40	3.87892	0.087	0.008	2.78314562018046e-36
Cdh5	7.67651586566948e-28	3.8775	0.061	0.006	1.86792660559336e-23
Gm48703	2.62927477280593e-09	3.87362	0.034	0.007	6.39781430466866e-05
Myrip	7.8576940398048e-56	3.87093	0.108	0.008	1.9120126907057e-51
Gpr12	1.12572342002121e-10	3.86833	0.017	0.001	2.7392227979376e-06
Rln1	3.52106417708905e-21	3.86546	0.028	0.001	8.56780546211078e-17
Plb1	6.72381639206475e-131	3.86395	0.269	0.022	1.63610624268112e-126
Serpinb12	9.49431693990018e-10	3.86026	0.017	0.001	2.31025214098591e-05
Gm43821	8.89345847635441e-20	3.85511	0.04	0.003	2.16404525105132e-15
Rgs6	3.41617359774677e-27	3.83551	0.078	0.011	8.31257521539723e-23
Copz2	5.65463900052419e-45	3.8256	0.091	0.007	1.37594330799755e-40
Il17rb	3.77889432380296e-294	3.82116	0.858	0.196	9.19518355810974e-290
Gm17396	2.9826898128333e-07	3.81836	0.011	0.001	0.00725778
Ces1f	2.9936746645814e-07	3.81123	0.011	0.001	0.00728451
Fbln5	5.09354968014551e-93	3.80575	0.182	0.013	1.23941344366981e-88
Fat3	1.20590548744603e-155	3.78989	0.364	0.039	2.93432982260242e-151
E230001N04Rik	1.1707944149565e-13	3.783	0.025	0.002	2.84889404991365e-09
Pld5	6.54759654516488e-24	3.77951	0.055	0.006	1.59322666733497e-19
Gm21762	2.66869659238249e-08	3.76802	0.011	0.001	0.000649374
Ppp2r2c	2.35717045148074e-97	3.76511	0.224	0.022	5.73570285958807e-93
Trim35	8.52110079050092e-183	3.76439	0.381	0.033	2.07343945535259e-178
Slc2a3	3.64890608796443e-36	3.75215	0.095	0.011	8.87888318384384e-32
Nudt11	8.92348577456549e-53	3.73438	0.12	0.011	2.17135179352502e-48
Zkscan4	3.74966173549832e-12	3.73302	0.019	0.001	9.12405190098806e-08
Fhl1	6.17338883644989e-18	3.73293	0.03	0.002	1.50217070557335e-13
Lgi1	2.83424904991248e-32	3.732	0.063	0.005	6.89657821315205e-28
Plpp3	3.43323942846305e-186	3.72978	0.617	0.129	8.35410150127914e-182
Adamts7	3.40228347767983e-10	3.72735	0.025	0.003	8.27877638623834e-06
Chst2	9.60871570810404e-43	3.72473	0.089	0.007	2.33808879325296e-38
Plppr1	3.58964260346626e-20	3.71457	0.046	0.005	8.73467734701445e-16
Pid1	1.5426665408178e-32	3.71403	0.066	0.005	3.75377049377196e-28
Hecw2	3.87864794172778e-63	3.71239	0.148	0.015	9.43791403660621e-59
Thbs1	1.99456557014169e-167	3.7105	0.44	0.06	4.85337640182578e-163
Actn2	1.56723120786829e-49	3.70706	0.099	0.007	3.81354369810592e-45
Arsj	3.01939676973514e-73	3.69802	0.159	0.014	7.34709815979651e-69
Klk8	2.79732025747237e-13	3.69764	0.03	0.003	6.80671938250751e-09
Camk1g	1.35726884146444e-14	3.69654	0.03	0.003	3.30264227193543e-10
Cnn1	5.47180296394581e-19	3.69106	0.03	0.002	1.33145381521693e-14
Dennd2a	2.10898707745253e-274	3.68215	0.607	0.066	5.13179825556523e-270
Slc36a2	1.22691656213707e-13	3.67969	0.025	0.002	2.98545607064813e-09
Cdh2	9.34616366802832e-21	3.66229	0.047	0.005	2.27420200534133e-16
Hpgds	1.97060058816215e-48	3.66187	0.133	0.017	4.79506241117496e-44
Pla2g7	0	3.66062	0.875	0.158	0
Cacna1g	3.14582225638778e-10	3.65551	0.015	0.001	7.6547292964684e-06
Gm57048	7.31820653562921e-10	3.65422	0.013	0.001	1.78073919631466e-05
Gm57199	2.30376774374749e-08	3.65284	0.015	0.001	0.000560576
Aqp11	5.9325143672407e-122	3.64775	0.309	0.037	1.44355872098068e-117
Arhgap31	3.26508504539732e-105	3.6471	0.228	0.02	7.94493144096531e-101
P3h3	2.9826898128333e-07	3.64624	0.011	0.001	0.00725778
Calb1	1.31210202607622e-238	3.63909	0.666	0.111	3.19273786005126e-234
Gm22146	3.421835453732e-09	3.63403	0.025	0.004	8.32635220956608e-05
Gfap	1.27495353286234e-43	3.63363	0.108	0.012	3.10234443151393e-39
Ttc28	1.08609552699583e-73	3.62422	0.157	0.013	2.64279624583896e-69
Bche	3.19286491418934e-163	3.61185	0.376	0.04	7.76919819569692e-159
Gm16081	2.99000901359237e-07	3.6087	0.011	0.001	0.00727559
Cphx1	3.22687875216694e-09	3.57664	0.015	0.001	7.85196406764781e-05
D5Ertd615e	2.3293967818433e-08	3.57311	0.015	0.001	0.000566812
Tcf15	2.56483730672497e-10	3.57255	0.019	0.002	6.24101861845387e-06
A930009A15Rik	4.55038233477324e-12	3.57174	0.025	0.002	1.10724453352037e-07
Emid1	3.39122728873825e-144	3.57042	0.29	0.023	8.25187336168678e-140
Wfdc15b	4.79521707481377e-86	3.5677	0.186	0.016	1.16682017081443e-81
Clec1b	2.32424893399039e-08	3.56021	0.015	0.001	0.000565559
Timp3	3.51602856779159e-73	3.54721	0.209	0.028	8.55555231400729e-69
Sox5	1.6991998728411e-268	3.54189	0.787	0.153	4.13466305058424e-264
Smim10l2a	1.24426286384018e-13	3.54023	0.025	0.002	3.0276648265823e-09
Wipf3	2.46992978171747e-18	3.53712	0.053	0.008	6.01008013785312e-14
Gm14372	8.39553474129548e-10	3.53712	0.027	0.004	2.04288546859943e-05
Rnf223	1.73512355851024e-33	3.53668	0.076	0.007	4.22207615492297e-29
Ppp1r36	2.88128872578607e-153	3.53168	0.378	0.045	7.01103985645525e-149
Synpo2	6.25223179542857e-31	3.52344	0.078	0.009	1.52135556278163e-26
Magix	1.27262703293705e-24	3.51276	0.059	0.006	3.09668335924572e-20
Dbx2	2.96854184723819e-13	3.51212	0.03	0.003	7.22335287688468e-09
Rims1	4.86402120453046e-73	3.5086	0.154	0.013	1.1835622796984e-68
Dipk1b	6.28899465980986e-33	3.49997	0.07	0.006	1.53030107057153e-28
Fbxl21	3.02040987151381e-22	3.49336	0.07	0.011	7.34956334035456e-18
Msi1	5.06313871743365e-17	3.48664	0.04	0.004	1.23201354411313e-12
Gm40578	5.12141387593414e-79	3.46625	0.197	0.022	1.24619363843105e-74
Gm35215	3.04024733965641e-12	3.44159	0.023	0.002	7.39783385158593e-08
Ifitm10	2.13809726926934e-171	3.43827	0.414	0.046	5.20263208531308e-167
Lrrc17	1.11465923815353e-14	3.43298	0.038	0.005	2.71230032419898e-10
Atoh8	3.45085251587596e-15	3.42855	0.032	0.003	8.39695942688097e-11
Gm34068	1.08258527561193e-16	3.42784	0.046	0.006	2.63425475114652e-12
Casq1	2.68813292668401e-34	3.4248	0.072	0.006	6.5410338505002e-30
Pla2g5	1.58127375527823e-133	3.42456	0.3	0.029	3.84771342871852e-129
Ikzf4	2.62709844228043e-10	3.42392	0.027	0.004	6.39251863960097e-06
Gm49427	6.01281967618842e-09	3.4205	0.017	0.002	0.00014631
Irak1bp1	1.02200443128745e-11	3.41359	0.032	0.005	2.48684338265175e-07
Sox2ot	5.90908881920757e-26	3.40748	0.055	0.005	1.43785858237778e-21
Gm34278	2.27852789917416e-42	3.40476	0.095	0.009	5.54434193706047e-38
Hopx	3.12838364312741e-129	3.39766	0.412	0.069	7.61229591882192e-125
Ptgs1	5.17994304527844e-240	3.39659	0.598	0.079	1.2604355412076e-235
Lims2	3.03661047681093e-30	3.39518	0.066	0.006	7.38898427322404e-26
Frem2	2.29372473336214e-26	3.39195	0.063	0.007	5.5813203936901e-22
Samd14	1.99897802517437e-26	3.39007	0.061	0.006	4.86411322865679e-22
Pnliprp2	3.01656850098691e-08	3.38965	0.017	0.002	0.000734022
Duxbl1	3.55643945458188e-58	3.38516	0.099	0.005	8.65388412483409e-54
Gja4	2.88302073899722e-13	3.38379	0.028	0.003	7.01525436420194e-09
Slc25a48	2.28301791839039e-295	3.37991	0.973	0.403	5.55526750081933e-291
Gm12249	3.01945962513525e-07	3.36792	0.011	0.001	0.00734725
Nckap5l	1.07420601999185e-41	3.36676	0.106	0.012	2.61386550844616e-37
Stard13	3.18118053548916e-165	3.35742	0.558	0.109	7.74076659700577e-161
Fbxo16	2.45417979262806e-45	3.34695	0.108	0.011	5.97175568940187e-41
Scx	5.50069146384874e-189	3.34415	0.545	0.089	1.33848325389831e-184
A930001A20Rik	2.2119213816537e-08	3.33925	0.021	0.003	0.000538227
Nudt10	8.13523681135118e-45	3.33145	0.139	0.021	1.97954717330608e-40
Sbspon	1.49998632628034e-143	3.3274	0.398	0.056	3.64991672773794e-139
Thrsp	6.52352787477961e-223	3.32555	0.731	0.164	1.58737003777012e-218
ccdc198	1.81221879768844e-19	3.31718	0.046	0.005	4.40967200041529e-15
Gm34267	1.74758123666624e-11	3.31572	0.028	0.004	4.25238942317995e-07
Serpinh1	8.67087122079178e-237	3.30974	0.651	0.107	2.10988309415526e-232
Fkbp10	1.54844795373502e-09	3.29715	0.019	0.002	3.76783840582343e-05
Slc6a15	1.76401196166069e-13	3.29554	0.036	0.005	4.29237030630895e-09
Phlda2	1.68980579487981e-09	3.29094	0.021	0.002	4.11180444068103e-05
Il20ra	1.5421457872661e-48	3.28845	0.131	0.016	3.75250334415461e-44
Tbx2	9.08856797621013e-08	3.2873	0.028	0.006	0.00221152
Zbtb16	7.56336017929105e-49	3.28348	0.082	0.004	1.84039243242689e-44
5730471H19Rik	1.64237098109803e-108	3.28093	0.302	0.041	3.99638130830585e-104
Greb1l	5.42249112111576e-181	3.26013	0.556	0.095	1.3194547645011e-176
Akap17b	3.82864026729661e-34	3.25854	0.097	0.013	9.31623036241284e-30
Gask1a	2.86678436321811e-18	3.25834	0.04	0.004	6.97574639101863e-14
Cfap70	1.50540418298257e-14	3.25829	0.036	0.004	3.6630999984515e-10
Trp63	4.35597889497836e-17	3.2562	0.036	0.003	1.05994034451508e-12
Hk1os	2.23077283609075e-35	3.24979	0.091	0.011	5.42813954205963e-31
Pvt1	2.44734903090477e-276	3.24813	0.748	0.12	5.95513439690057e-272
Efhd1	6.79634691350789e-57	3.23736	0.23	0.046	1.65375509446387e-52
Ebf4	5.75304629538876e-124	3.23389	0.326	0.041	1.39988875505695e-119
Spsb4	5.62130055270093e-131	3.22882	0.347	0.044	1.36783106348872e-126
Ccn2	9.40483839429846e-68	3.21839	0.218	0.034	2.28847932648464e-63
Gstm1	3.07269894396966e-234	3.21621	0.676	0.117	7.47679834036138e-230
Chrd	3.98590655109516e-15	3.20829	0.036	0.004	9.69890641077985e-11
A330040F15Rik	5.21522389955915e-09	3.20028	0.023	0.003	0.000126902
Rasgrp3	5.80244211982517e-27	3.19179	0.066	0.007	1.41190824101706e-22
Hsd11b2	5.37240605919272e-48	3.1916	0.116	0.012	1.30726756638336e-43
2700054A10Rik	9.52483579488433e-227	3.18802	0.645	0.105	2.3176782939692e-222
Krt79	5.92310321183759e-13	3.18769	0.04	0.006	1.44126870453644e-08
Fsip1	3.55749235223663e-10	3.17517	0.025	0.003	8.65644614069738e-06
Gm56862	2.19459207434373e-29	3.16291	0.085	0.012	5.3401008945006e-25
Gm1043	2.24626974975322e-35	3.16159	0.099	0.013	5.4658481820745e-31
Dok7	7.59993125721177e-57	3.15932	0.148	0.017	1.84929127281734e-52
Klf12	3.39842390123899e-50	3.15841	0.169	0.028	8.26938487888484e-46
Ccnd2	4.21327081326192e-118	3.1576	0.343	0.049	1.02521518699102e-113
Hspa12b	2.8112093129198e-08	3.15658	0.019	0.002	0.000684052
Gja3	1.48125533923148e-73	3.15487	0.22	0.032	3.60433861695197e-69
Zfp651	4.24551096900881e-70	3.15299	0.197	0.026	1.03306018408891e-65
Gal3st1	4.35874972472793e-47	3.14959	0.146	0.022	1.06061457051805e-42
Gdap1l1	2.82660816134476e-08	3.14286	0.019	0.002	0.000687799
Ddah2	3.71513124311652e-155	3.14234	0.419	0.057	9.04002885387544e-151
Abca4	2.64746302083701e-220	3.14001	0.672	0.127	6.44207176860269e-216
Kcnn3	4.65990595562344e-53	3.13612	0.118	0.011	1.13389491618185e-48
C1ql1	3.46177179711893e-10	3.13279	0.03	0.005	8.42352931392948e-06
B4galnt4	4.0367792605312e-15	3.12713	0.044	0.006	9.82269497465056e-11
Ccdc30	1.17940150444187e-16	3.1263	0.032	0.003	2.8698376807584e-12
Amdhd1	2.56739470097215e-20	3.12163	0.053	0.007	6.24724152587554e-16
Krt36	2.77177522624469e-30	3.11689	0.072	0.008	6.7445606580212e-26
Serpine2	1.55612782115786e-08	3.11618	0.027	0.005	0.000378653
Gm20757	5.45338660611313e-26	3.11515	0.112	0.024	1.32697256286551e-21
2310081O03Rik	2.21127499450066e-13	3.11041	0.034	0.004	5.38069544411845e-09
Ifitm1	1.60173859070457e-276	3.1029	0.985	0.548	3.89751051276143e-272
Dram1	7.95200825348625e-106	3.09715	0.315	0.047	1.93496216832081e-101
Fgf16	3.49134608963892e-55	3.09697	0.123	0.011	8.49549243991839e-51
Dmtn	3.29231960006749e-81	3.09578	0.207	0.024	8.01120128284423e-77
Hydin	3.18311954261666e-73	3.09476	0.224	0.034	7.74548478304913e-69
Col12a1	2.67780916057987e-87	3.09167	0.366	0.082	6.51591303043901e-83
Syde1	2.04518413691156e-49	3.09004	0.137	0.017	4.97654656034689e-45
Ppic	1.87547355805712e-48	3.0738	0.154	0.024	4.56358980882039e-44
Cspg5	3.65798777697308e-44	3.07026	0.121	0.015	8.9009816577086e-40
P3h1	3.24794573751209e-13	3.06902	0.03	0.003	7.90322636308817e-09
S100a4	1.07295652852744e-25	3.0579	0.072	0.01	2.61082512086582e-21
Slc8a1	5.67627519055441e-229	3.05472	0.664	0.108	1.3812080421176e-224
Nlgn1	2.80116900702677e-09	3.04494	0.034	0.007	6.81608454479825e-05
Apba1	1.17370405672217e-19	3.04324	0.063	0.01	2.85597408122205e-15
Gask1b	3.41132544316082e-31	3.04075	0.083	0.01	8.30077820084323e-27
Emb	7.02884787993118e-256	3.04002	0.913	0.33	1.71032955462365e-251
Cyb5r3	1.44088199881762e-261	3.03089	0.96	0.526	3.50609816772292e-257
Cox4i2	1.57003789588022e-09	3.0286	0.023	0.003	3.82037321204533e-05
Gm16178	2.56187187962741e-28	3.02282	0.07	0.008	6.23380284469738e-24
Gm35585	1.55491562315774e-09	3.01664	0.019	0.002	3.78357618582972e-05
Acss3	2.78324404526333e-40	3.00985	0.095	0.01	6.77246773533927e-36
Nrg4	7.62737114032916e-133	3.00077	0.364	0.05	1.8559682195763e-128
Col4a4	1.3055378122246e-56	2.99582	0.167	0.023	3.17676515848612e-52
Ovgp1	1.21509733611752e-16	2.98882	0.129	0.043	2.95669634797477e-12
Kctd8	5.83795176045583e-45	2.97824	0.12	0.014	1.42054880187172e-40
Gm54310	8.45546620589956e-09	2.9777	0.028	0.005	0.000205747
Actr3b	4.79023227765792e-11	2.9718	0.044	0.009	1.1656072201225e-06
Efcab12	4.8812615402293e-27	2.96985	0.078	0.011	1.187757370584e-22
Nipsnap1	4.93648501871287e-246	2.96233	0.814	0.207	1.2011948996034e-241
Dnajb3	3.04608513623331e-15	2.95595	0.04	0.005	7.41203896199652e-11
Cracd	4.08669096457479e-21	2.95371	0.082	0.016	9.94414512409984e-17
Dab1	7.87636353079284e-19	2.95304	0.055	0.008	1.91655553794782e-14
Mitf	9.70215538742017e-83	2.94972	0.328	0.068	2.36082547042095e-78
Caprin2	1.50526933937473e-70	2.94488	0.302	0.067	3.66277188350053e-66
Cyp2f2	1.58197156702377e-08	2.94013	0.023	0.003	0.000384941
Abhd14a	1.58947594433407e-69	2.93532	0.231	0.039	3.86767181534809e-65
Tmem17	5.98806766020519e-20	2.93497	0.061	0.009	1.45707650375773e-15
Gm15326	2.35530247232511e-08	2.92858	0.015	0.001	0.000573116
Clip4	2.65069954613196e-34	2.92821	0.095	0.012	6.44994720560291e-30
Upk1a	8.95542973266697e-26	2.92569	0.074	0.01	2.17912471684985e-21
Hspb8	3.87274457058373e-19	2.92012	0.038	0.003	9.42354936360138e-15
C230072F16Rik	2.35296546616373e-11	2.91884	0.025	0.003	5.7254708688162e-07
Peg3	2.1810324763174e-17	2.9164	0.063	0.011	5.30710632462314e-13
Pde1a	1.80758149902372e-36	2.91559	0.102	0.013	4.39838806157442e-32
Hdc	3.7646956490648e-175	2.91349	0.67	0.167	9.16063392286938e-171
Col4a3	1.66751192323473e-13	2.90615	0.047	0.009	4.05755676280706e-09
Gm266	1.71852405654489e-109	2.90366	0.37	0.066	4.18168458679067e-105
Egflam	7.09156731603106e-26	2.90092	0.093	0.016	1.72559107500984e-21
Enpp1	3.11372780445437e-95	2.89975	0.381	0.082	7.57663386657882e-91
Entrep1	1.44783462913783e-151	2.89777	0.66	0.183	3.52301600308107e-147
D630045J12Rik	4.66357782257398e-114	2.89417	0.404	0.076	1.13478839156693e-109
Stk32b	6.3700598176533e-11	2.89049	0.028	0.004	1.55002665542958e-06
Enox1	2.79507055639374e-38	2.88709	0.129	0.021	6.80124518487288e-34
Pinlyp	1.66935787295638e-12	2.88656	0.04	0.007	4.06204851226475e-08
Scara3	4.18399461286996e-14	2.88584	0.038	0.005	1.01809140914965e-09
Gm16793	6.96713267598759e-12	2.88032	0.034	0.005	1.69531239404806e-07
Ptn	1.31272112730129e-149	2.8788	0.634	0.173	3.19424431906223e-145
Klf8	7.1183697168716e-11	2.87733	0.036	0.006	1.73211290320637e-06
Axl	6.18916729724018e-11	2.86399	0.028	0.004	1.50601007843745e-06
Sult1d1	8.68319907005844e-189	2.86216	0.738	0.201	2.11288282971732e-184
Kcnb2	7.08437250129756e-62	2.86045	0.199	0.031	1.72384036074073e-57
Ppp1r14c	4.72495415244478e-63	2.85976	0.18	0.024	1.14972309391439e-58
Astn2	6.18965108053948e-204	2.85931	0.833	0.245	1.50612779742767e-199
Cmya5	1.35803232741721e-39	2.85314	0.118	0.017	3.30450006230431e-35
Degs2	6.57619581796083e-14	2.84422	0.034	0.004	1.60018572838441e-09
Podxl	8.20723403258823e-36	2.84399	0.114	0.017	1.99706625714969e-31
Chst10	1.28540883182402e-07	2.84292	0.015	0.002	0.00312779
Gcnt3	2.23311510962646e-214	2.84077	0.742	0.173	5.43383899625405e-210
Acyp2	1.8550461968431e-162	2.81751	0.565	0.113	4.51388391077833e-158
Dbndd2	6.71216020368493e-207	2.81544	0.789	0.233	1.63326994236265e-202
Cand2	1.68694132675732e-21	2.81536	0.082	0.015	4.10483433039859e-17
Golm2	1.58024413608799e-146	2.81401	0.533	0.111	3.8452080563429e-142
Gstm7	7.38369657781543e-101	2.81145	0.345	0.062	1.79667488827983e-96
Ccl27a	1.31900206798398e-17	2.81036	0.051	0.007	3.20952773202541e-13
Nkd2	2.89633931974461e-17	2.80588	0.059	0.01	7.04766246673455e-13
E330013P04Rik	2.58107525701212e-100	2.80303	0.402	0.088	6.28053042288759e-96
C1qtnf9	4.09954310158326e-24	2.80085	0.082	0.014	9.97541822908254e-20
Gm44167	6.80997068593898e-61	2.79992	0.216	0.038	1.65707016700953e-56
Scd1	3.07844398535269e-41	2.79819	0.171	0.035	7.49077774955869e-37
Rbms3	5.25265621786933e-243	2.79818	0.907	0.279	1.27812883749414e-238
Cybrd1	3.17930689588622e-23	2.79069	0.066	0.009	7.73620746975993e-19
Gm12735	6.06016873794956e-14	2.79023	0.028	0.003	1.47462085900527e-09
Mamld1	1.26167415448361e-105	2.78991	0.366	0.065	3.07003172010496e-101
Tspyl4	8.49776161471998e-17	2.78756	0.061	0.011	2.06776033370981e-12
Tnfrsf25	1.59166412573408e-13	2.78699	0.042	0.007	3.87299631714874e-09
Adcy3	3.03678350802548e-10	2.7835	0.034	0.006	7.38940531007841e-06
Mzb1	2.1854318732045e-10	2.78291	0.032	0.005	5.31781137706852e-06
Atp2b2	1.27665721675076e-252	2.78155	0.941	0.33	3.10649000551961e-248
Stox2	7.5368019880853e-187	2.78147	0.651	0.132	1.8339300277608e-182
Nme4	1.52030721962723e-23	2.78056	0.085	0.015	3.69936355751894e-19
Ccdc136	3.78290327760133e-31	2.78047	0.104	0.017	9.20493854538733e-27
Ptgr1	1.96449805196476e-106	2.7803	0.41	0.085	4.78021310984585e-102
Fam181b	7.11150981351731e-12	2.77526	0.034	0.005	1.73044368292317e-07
Lgi2	6.35494221064109e-114	2.7729	0.393	0.071	1.5463480881153e-109
AU021092	7.4496601001703e-119	2.77119	0.417	0.08	1.81272579217444e-114
Ivl	8.1092636682322e-08	2.76894	0.027	0.005	0.00197323
Tuba1a	1.601043697816e-56	2.76803	0.201	0.035	3.89581962989566e-52
Gstm2	1.89936193757947e-192	2.76658	0.723	0.186	4.62171740271213e-188
Dmpk	2.35477804594743e-64	2.75981	0.228	0.04	5.72988141920388e-60
Nrg1	1.59269444434215e-69	2.75657	0.497	0.191	3.87550339141774e-65
Ankrd66	3.66866232698861e-10	2.75528	0.021	0.002	8.92695604026139e-06
Tmem47	5.10826166420095e-41	2.75061	0.15	0.027	1.24299331075002e-36
Fam228b	1.10103942176779e-18	2.74633	0.053	0.007	2.67915922498755e-14
Hnf1aos1	1.32273056169361e-10	2.74362	0.03	0.005	3.21860027576906e-06
Slc7a11	4.65280353554078e-168	2.74189	0.791	0.28	1.13216668430314e-163
9130015G15Rik	6.52977433339129e-15	2.74131	0.057	0.011	1.5888899885441e-10
Kctd17	1.68748347123763e-15	2.7362	0.044	0.006	4.10615353056251e-11
Hspb2	3.01036989882813e-07	2.73435	0.019	0.003	0.00732513
Slc27a3	8.55865689080033e-198	2.73079	0.628	0.116	2.08257798123844e-193
Sgk1	7.38494574213537e-125	2.72657	0.609	0.19	1.7969788474338e-120
Morn4	2.25298608488346e-11	2.71761	0.04	0.007	5.48219104034691e-07
D7Ertd443e	5.30425646399543e-29	2.71569	0.089	0.013	1.29068472538401e-24
Zfp57	3.99071971288628e-13	2.70994	0.047	0.009	9.71061827736618e-09
Cth	7.70607321986476e-28	2.70662	0.118	0.024	1.87511879658969e-23
Shank2	3.27796778594109e-242	2.70521	0.848	0.209	7.97627901353046e-238
Krt15	2.51073953400133e-23	2.69504	0.072	0.011	6.10938250808543e-19
Gjb3	1.48084142705805e-116	2.694	0.45	0.096	3.60333144446034e-112
Pcolce2	4.4122793207176e-172	2.69257	0.664	0.161	1.07363992711021e-167
Hyal3	1.75064499173692e-19	2.69072	0.057	0.008	4.25984445839345e-15
Pabpc1l	6.01690565959275e-13	2.68671	0.036	0.005	1.4640936541487e-08
Fgf12	8.83317588337932e-33	2.68382	0.101	0.015	2.14937668770269e-28
Frmpd4	1.23390369103322e-09	2.68251	0.025	0.003	3.00245785139113e-05
Macroh2a2	5.46930824988461e-44	2.67613	0.123	0.016	1.33084677644442e-39
Dync2li1	1.82837256011198e-47	2.67418	0.19	0.038	4.44897895052048e-43
Fkbp5	4.67525729227192e-135	2.67281	0.573	0.144	1.13763035692853e-130
Gsn	1.83608107006598e-179	2.6719	0.772	0.252	4.46773606779155e-175
Car8	9.45581555620819e-18	2.67151	0.053	0.008	2.30088359929214e-13
St3gal2	2.29620730809114e-20	2.67061	0.068	0.011	5.58736124277817e-16
Sox17	1.05459263660608e-214	2.6706	0.926	0.519	2.56614026265358e-210
Smim6	1.00291882609746e-23	2.66239	0.082	0.014	2.44040237954296e-19
Fbxo27	7.4849535107901e-15	2.65498	0.042	0.006	1.82131373778055e-10
Fbxw10	3.69439022169377e-07	2.65476	0.027	0.006	0.00898956
Scara5	1.43768471167966e-17	2.64309	0.042	0.005	3.49831820893013e-13
Mxra7	1.39576934802148e-46	2.64247	0.18	0.035	3.39632555454066e-42
Dab2	8.30292774312872e-40	2.63978	0.159	0.031	2.02035140773551e-35
Gjb6	1.56645939776434e-07	2.63892	0.025	0.005	0.00381167
Id2	3.80220148181878e-215	2.63558	0.928	0.424	9.25189686570963e-211
S1pr2	3.73620456421272e-14	2.62405	0.044	0.007	9.09130656609882e-10
Id3	4.00849254869609e-89	2.62052	0.423	0.109	9.75386491874219e-85
Rtl8b	2.63791465397998e-40	2.62042	0.127	0.019	6.41883772752948e-36
Arnt2	3.30269460827881e-191	2.62004	0.708	0.157	8.03644679032483e-187
Slc39a14	5.06720794311672e-208	2.61458	0.871	0.313	1.23300370879859e-203
Mb	4.67156109246057e-08	2.61424	0.023	0.004	0.00113673
Etv5	4.97071700157412e-127	2.61233	0.457	0.089	1.20952456799303e-122
Gm50323	3.67980410203832e-52	2.61021	0.175	0.028	8.95406732148983e-48
1110002E22Rik	7.14899185310108e-19	2.60961	0.055	0.008	1.73956418761509e-14
Gm40841	1.80439592282804e-11	2.60082	0.023	0.002	4.39063659901746e-07
Scn2b	4.60748385497366e-08	2.59884	0.023	0.004	0.00112114
Cux2	6.712478278613e-14	2.59137	0.055	0.011	1.6333473395349e-09
Smim1	1.07257913306998e-54	2.59071	0.222	0.045	2.60990680449919e-50
Adamts10	1.19565835574354e-19	2.59003	0.089	0.02	2.90939547703076e-15
Fermt2	5.86765030430517e-56	2.586	0.209	0.038	1.42777534854658e-51
Tmed6	1.8596977807623e-10	2.55372	0.042	0.009	4.52520260992891e-06
Palld	3.180863098204e-169	2.53781	0.816	0.301	7.73999417685979e-165
Pik3ap1	3.16861853386746e-151	2.53322	0.702	0.209	7.71019947845968e-147
H1f10	1.44861304818749e-38	2.53159	0.146	0.027	3.52491013015461e-34
Cacnb4	4.04803176477931e-20	2.52786	0.07	0.012	9.8500756932375e-16
Ebpl	7.18527500066692e-40	2.52601	0.173	0.037	1.74839296591228e-35
9630014M24Rik	7.19037755027108e-54	2.52403	0.201	0.037	1.74963456930746e-49
Trpm3	7.2313859244646e-30	2.52347	0.161	0.042	1.75961313699997e-25
Gm20052	1.19416413314908e-07	2.51804	0.023	0.004	0.00290576
Rec8	1.32014308170082e-11	2.51721	0.051	0.012	3.21230416070259e-07
Syn2	1.49779153365382e-20	2.51701	0.07	0.012	3.64457613883983e-16
Kcnq5	4.77658339715781e-32	2.51639	0.133	0.027	1.16228603803041e-27
Ikzf1	5.27619141384953e-66	2.51604	0.249	0.047	1.28385565673201e-61
Pkdcc	6.78254329264308e-28	2.51314	0.104	0.019	1.65039625939884e-23
Cib2	3.43801501283601e-14	2.51098	0.072	0.018	8.36572193073385e-10
Ccdc60	2.02906723697573e-11	2.5086	0.034	0.005	4.93732930773305e-07
Hspb1	3.41029237041354e-208	2.50564	0.937	0.471	8.29826442492727e-204
Abi2	7.52120419461115e-53	2.50457	0.213	0.042	1.83013461667473e-48
Stc1	1.31338762060291e-22	2.50328	0.095	0.02	3.19586609721306e-18
Dnah7b	5.67856488953729e-38	2.50168	0.129	0.021	1.38176519457111e-33
Ccdc3	1.18509272851507e-21	2.49848	0.093	0.02	2.88368613629572e-17
Adgrg2	6.89411665635212e-17	2.49835	0.068	0.014	1.67754540599016e-12
Atp2a3	8.09978373802192e-35	2.4957	0.14	0.028	1.97092037697287e-30
BC018473	7.42141007212457e-18	2.48788	0.072	0.015	1.80585171285007e-13
Gramd2	1.64575919561825e-25	2.48495	0.104	0.021	4.00462585069789e-21
Gm4316	1.84471827864505e-31	2.48201	0.14	0.031	4.488752987427e-27
Gspt2	1.0228850892663e-49	2.48134	0.163	0.026	2.48898628771168e-45
Wdr35	2.21971627821551e-23	2.47449	0.085	0.015	5.4012356197818e-19
Sult2b1	2.44049391598802e-26	2.46998	0.091	0.015	5.93845384577364e-22
Ctnnd2	4.04446133185067e-101	2.46598	0.471	0.117	9.84138775879223e-97
Gm16638	6.87889136253363e-32	2.46092	0.123	0.023	1.67384063524531e-27
Lmtk3	2.12612046274518e-09	2.46055	0.044	0.011	5.17348892199784e-05
Sorbs3	3.09296167010232e-17	2.45978	0.068	0.014	7.52610363185999e-13
Kcnt2	1.30984578648358e-128	2.45748	0.651	0.199	3.1872477522505e-124
Plekhg5	4.30080601551274e-122	2.4565	0.516	0.122	1.04651512775472e-117
Gm41386	8.47527530247833e-08	2.45554	0.032	0.007	0.00206229
Cdkl1	1.24729516062924e-237	2.45063	0.966	0.44	3.03504331435914e-233
Ttc12	3.64980679557113e-37	2.44907	0.165	0.036	8.88107487566322e-33
Aldh1a7	1.72966378915574e-12	2.44866	0.036	0.005	4.20879089815266e-08
Cnn3	3.9330140107856e-156	2.44414	0.816	0.334	9.57020299244459e-152
Cd200	3.31128817561098e-22	2.44405	0.101	0.022	8.0573575177142e-18
Pmp22	1.47399559164039e-35	2.44086	0.205	0.057	3.58667347313855e-31
Ppp2r2b	2.21138315900295e-194	2.43778	0.943	0.379	5.38095864080187e-190
Abcc5	1.26856824490269e-44	2.4212	0.182	0.036	3.08680711032172e-40
Nradd	3.97011567528418e-137	2.41893	0.584	0.148	9.66048247266901e-133
3010001F23Rik	1.7761487062384e-09	2.40455	0.021	0.002	4.3219026468899e-05
Eid1	1.23485287564069e-123	2.40273	0.52	0.125	3.00476750229649e-119
E230013L22Rik	5.34702665861427e-35	2.39413	0.127	0.022	1.30109199684061e-30
Pitpnm2	9.06386759062083e-97	2.39413	0.406	0.09	2.20551090082577e-92
Gm42439	1.03972455844349e-11	2.39114	0.04	0.007	2.52996176806055e-07
5033406O09Rik	1.01262699351496e-28	2.38933	0.165	0.045	2.46402526331996e-24
Slc46a1	9.17881162722575e-17	2.38861	0.076	0.017	2.23348023325284e-12
Tns1	6.15663105194679e-174	2.38785	0.846	0.337	1.49809303387021e-169
Wnt5a	7.4987295044894e-159	2.38392	0.755	0.255	1.82466585032741e-154
2310043M15Rik	1.61068367226624e-94	2.37502	0.427	0.101	3.91927657972544e-90
Eml1	2.25943651375296e-08	2.37368	0.034	0.008	0.000549789
Dbn1	2.82859623637737e-32	2.36973	0.127	0.024	6.88282322197706e-28
Flna	6.4920099338171e-160	2.36843	0.75	0.241	1.57970077719571e-155
F8	9.13775309765449e-21	2.36618	0.087	0.018	2.22348946125227e-16
Dlgap1	3.49749655290478e-50	2.36508	0.419	0.167	8.51045836218321e-46
Castor1	6.64167481324853e-16	2.36424	0.074	0.017	1.61611873230777e-11
Pcx	1.33061203941866e-110	2.36365	0.687	0.266	3.23777827551743e-106
B230208H11Rik	3.90526158747046e-09	2.3626	0.047	0.013	9.50267302079188e-05
Gm35333	1.00650247316653e-19	2.36236	0.076	0.015	2.44912246795611e-15
2310002F09Rik	1.02012891949778e-25	2.35656	0.104	0.021	2.48227969981394e-21
Gamt	6.44914147276325e-08	2.35586	0.036	0.009	0.00156927
Trim47	1.53672164351216e-80	2.35521	0.328	0.069	3.73930477515814e-76
Fjx1	6.01339535062199e-62	2.35445	0.285	0.066	1.46323949066685e-57
Ltbp4	1.12754804308415e-69	2.35041	0.26	0.049	2.74366265323667e-65
9330154J02Rik	2.46719137761721e-33	2.34655	0.144	0.03	6.00341677915596e-29
Mybpc2	1.55882496344264e-09	2.34533	0.034	0.007	3.79308878354499e-05
Gm14317	3.99849530890329e-13	2.34403	0.023	0.002	9.72953863515438e-09
Gkap1	1.27579700071789e-93	2.33989	0.435	0.108	3.10439684184684e-89
Galm	5.49340929323753e-120	2.33983	0.645	0.211	1.33671128332349e-115
Raver2	1.50314695986436e-31	2.33764	0.112	0.019	3.65760749743794e-27
Zc4h2	3.41289894452985e-12	2.3372	0.047	0.01	8.30460700172449e-08
Enpp6	4.60748385497366e-08	2.33502	0.023	0.004	0.00112114
Aldh7a1	7.86491192353683e-164	2.32947	0.755	0.243	1.91376901835422e-159
Tex15	3.52367817045859e-51	2.32778	0.184	0.032	8.57416609217688e-47
Nrp1	4.20544146046769e-113	2.32674	0.488	0.113	1.0233100705756e-108
Kcng3	1.05225642618478e-49	2.32472	0.275	0.074	2.56045556183542e-45
Gm13431	2.00147735960231e-21	2.32137	0.04	0.003	4.8701948591203e-17
Slc15a2	7.28129083940751e-134	2.32004	0.615	0.162	1.77175649995303e-129
Evc2	6.09621576353612e-19	2.31661	0.078	0.016	1.48339218174125e-14
Amt	9.42569799405559e-40	2.31224	0.201	0.05	2.29355509289355e-35
Cibar1	3.00179385526272e-70	2.30792	0.296	0.062	7.30426498801077e-66
Nrep	1.92738535560642e-121	2.30727	0.628	0.199	4.6899067857971e-117
Lrguk	2.46867856524526e-11	2.30581	0.051	0.012	6.0070355528113e-07
9230116N13Rik	2.92218964809607e-07	2.3006	0.032	0.008	0.00711056
1700001L05Rik	2.00172253586962e-42	2.29818	0.209	0.05	4.87079144653155e-38
Plekhd1os	6.996220388054e-08	2.29813	0.025	0.004	0.00170239
Adora1	1.41369275073049e-36	2.2938	0.148	0.029	3.43993857035251e-32
D630039A03Rik	4.97136361656674e-17	2.28819	0.091	0.024	1.20968190881918e-12
Myc	7.76030954238383e-119	2.28587	0.569	0.163	1.88831612094826e-114
G6pc2	3.14369129786616e-07	2.28585	0.019	0.003	0.00764954
Etv4	1.43619488369145e-07	2.2831	0.034	0.008	0.00349469
C030034L19Rik	4.85104258044947e-13	2.27521	0.053	0.011	1.18040419110077e-08
Klk10	1.24285069834469e-08	2.27479	0.034	0.007	0.000302423
Asrgl1	7.4075796219581e-61	2.27454	0.256	0.054	1.80248634941106e-56
Zfp41	1.11436838474324e-30	2.27343	0.163	0.042	2.71159259059572e-26
Fam118a	5.14519857300436e-14	2.26815	0.078	0.021	1.25198116876915e-09
Cthrc1	4.42237525766527e-10	2.26756	0.038	0.008	1.07609657144769e-05
Hs3st3a1	3.68577665619123e-17	2.26703	0.08	0.018	8.96860033751011e-13
Hk1	7.83289598555511e-171	2.26461	0.793	0.262	1.90597858016512e-166
Pbld1	4.35062967355118e-08	2.26371	0.04	0.01	0.00105864
Ccnd1	2.03398383309674e-175	2.26342	0.89	0.431	4.9492928610743e-171
Serpinb7	1.19766061692065e-07	2.25984	0.023	0.004	0.00291427
Rilpl1	1.55768179734373e-17	2.25887	0.066	0.013	3.79030711747649e-13
Nr4a3	6.24250317316702e-17	2.25587	0.08	0.019	1.51898829712673e-12
C9	2.15335904266547e-17	2.2553	0.061	0.011	5.2397685585179e-13
Gm16833	7.18132990789678e-12	2.25257	0.053	0.012	1.74743300648852e-07
Upk3b	1.78475221109549e-24	2.24949	0.123	0.03	4.34283755525866e-20
Klhl13	3.83048702543223e-16	2.24601	0.057	0.01	9.32072407898426e-12
Tceal8	2.83823604198392e-21	2.24249	0.112	0.029	6.90627976095947e-17
H60c	4.09413220386087e-33	2.24094	0.184	0.049	9.96225189165464e-29
Pcbd1	2.54971550126775e-60	2.23882	0.294	0.072	6.20422272923483e-56
Gm57151	7.61904710709997e-15	2.23726	0.068	0.016	1.85394273257064e-10
Slc22a5	2.41386262092152e-81	2.23664	0.603	0.249	5.87365191548833e-77
Lurap1	2.57226677280252e-63	2.23634	0.292	0.067	6.25909673826036e-59
Anpep	1.36930761164653e-243	2.23372	0.981	0.673	3.3319362114195e-239
Fgd1	4.79100760893708e-15	2.23293	0.051	0.009	1.16579588148266e-10
Calml3	3.47296908880665e-12	2.23044	0.047	0.01	8.45077568379323e-08
Cryab	4.54180395173644e-72	2.22537	0.311	0.068	1.10515715557603e-67
Chpt1	3.24378614954594e-154	2.21794	0.917	0.504	7.89310483769014e-150
Sccpdh	1.03832108012517e-53	2.21708	0.313	0.092	2.52654668426858e-49
Jam2	1.20228456925218e-46	2.21622	0.402	0.159	2.92551904236133e-42
Coq8a	6.89265443225967e-17	2.21534	0.076	0.017	1.67718960300175e-12
Zfp711	1.16357780203498e-19	2.21209	0.093	0.021	2.83133386569173e-15
Gck	2.62184090001447e-15	2.20836	0.072	0.017	6.37972546200521e-11
Mpdz	1.58040257220082e-20	2.19643	0.108	0.027	3.84559357893625e-16
Dnph1	1.74156574511882e-53	2.19456	0.239	0.053	4.23775192759762e-49
Gstk1	3.58835634734645e-11	2.19128	0.053	0.013	8.73154749999813e-07
Phyhd1	2.60260144894363e-45	2.18991	0.195	0.042	6.33291010571453e-41
Arg2	1.83120381470397e-33	2.18338	0.192	0.052	4.45586824231916e-29
Lgals1	1.65812525268258e-68	2.18297	0.273	0.054	4.03471617735253e-64
Spry4	1.67081650112875e-48	2.18296	0.228	0.052	4.06559779219658e-44
Rps6ka2	6.88462531155565e-52	2.18283	0.26	0.064	1.67523587706084e-47
Gm56688	4.12044115460177e-15	2.18265	0.063	0.013	1.00262694614925e-10
Id4	1.01761318661475e-27	2.17988	0.133	0.031	2.47615816698966e-23
Fam149a	1.01717655069775e-11	2.17918	0.066	0.018	2.47509570081284e-07
Gsdmc2	6.8164685622656e-09	2.17468	0.044	0.011	0.000165865
Aldh1a1	1.39279188058329e-24	2.1696	0.154	0.045	3.38908048302332e-20
Gm57399	4.58973572604548e-08	2.16655	0.032	0.007	0.00111682
Pard3b	1.50849722767291e-193	2.16496	0.951	0.428	3.67062630409649e-189
Cap2	2.47072680099172e-135	2.16373	0.748	0.271	6.01201952485315e-131
Arhgdig	1.73741907605372e-19	2.15493	0.093	0.022	4.22766183776152e-15
Nuak1	6.78917119106668e-29	2.15471	0.319	0.143	1.65200902592225e-24
Ms4a8a	7.1590048811965e-10	2.15383	0.034	0.006	1.74200065774155e-05
Apcdd1	7.29672263325366e-32	2.1506	0.148	0.033	1.77551151834961e-27
Ap3b2	8.03289570082194e-131	2.14696	0.639	0.183	1.954644510881e-126
Car11	1.07585823719211e-08	2.14223	0.025	0.004	0.000261789
Ift57	1.26591996115871e-57	2.14204	0.313	0.083	3.08036304148749e-53
Rimkla	4.98071624057207e-08	2.13699	0.032	0.007	0.00121196
Zhx3	1.52481233065306e-68	2.13565	0.457	0.153	3.71032584417808e-64
4933406I18Rik	3.35872568445659e-29	2.13295	0.14	0.033	8.17278720798822e-25
Slc7a4	7.8302545967102e-09	2.13125	0.051	0.015	0.000190534
Dhcr7	4.67074900586408e-61	2.12808	0.34	0.096	1.13653335559691e-56
Spink8	6.45974093962935e-08	2.12625	0.042	0.011	0.00157185
Rcl1	7.4070288615086e-155	2.12429	0.786	0.281	1.80235233287089e-150
Sdk1	3.70590201471494e-117	2.1236	0.854	0.474	9.01757137240587e-113
Gng10	3.06626414397568e-81	2.12283	0.442	0.13	7.46114054153602e-77
Iqcb1	6.74501795477491e-37	2.12193	0.195	0.049	1.64126521893538e-32
Unc93a2	1.83065516304471e-09	2.11911	0.053	0.015	4.4545332082367e-05
Jag2	5.17388750099975e-27	2.1185	0.131	0.031	1.25896204561827e-22
Maoa	2.51810609382008e-09	2.11164	0.051	0.014	6.12730755809241e-05
Tcaim	5.11268356033865e-66	2.11011	0.406	0.125	1.2440692907372e-61
L1cam	2.53818781064606e-34	2.1083	0.197	0.054	6.17617239964507e-30
Msx1	1.32686894228258e-144	2.10616	0.869	0.461	3.22867019725621e-140
Zfp37	2.3464035428916e-13	2.10222	0.044	0.007	5.70950374091813e-09
Tspan3	7.39544284546161e-71	2.09855	0.414	0.126	1.79953310758617e-66
Adamts17	1.89712997900667e-35	2.09611	0.184	0.046	4.61628637791692e-31
Cited4	3.93523161260957e-63	2.09439	0.459	0.172	9.57559908296287e-59
Tnfsf12	1.80896032197004e-13	2.09371	0.08	0.022	4.40174315144969e-09
Ces2g	3.48246358126297e-07	2.09158	0.025	0.005	0.00847388
Nhsl2	1.23732091332475e-94	2.09121	0.55	0.173	3.01077297839312e-90
Gng11	6.34722913740736e-19	2.09051	0.065	0.011	1.54447126600533e-14
Nxpe3	2.51112173891723e-47	2.08774	0.23	0.054	6.11031252730729e-43
Tln2	8.68738309368717e-108	2.08701	0.596	0.184	2.1139009281869e-103
Rogdi	4.17483750632787e-33	2.08559	0.154	0.035	1.01586321041476e-28
Sycp3	4.80935281127744e-08	2.08555	0.032	0.007	0.00117026
Adamts6	1.71140088597565e-140	2.08547	0.877	0.42	4.16435177584456e-136
Zfp184	2.22092070398132e-14	2.08391	0.123	0.045	5.40416634899774e-10
Gm28417	9.24351257210528e-10	2.07371	0.04	0.009	2.24922391417038e-05
Tesc	1.09225874501351e-13	2.07045	0.08	0.022	2.65779320424137e-09
Rab20	1.96715759728717e-149	2.06766	0.843	0.384	4.78668458147886e-145
Tgfbrap1	4.03555425367286e-85	2.06142	0.569	0.209	9.81971416546218e-81
Eid2	1.45359230819723e-23	2.05951	0.142	0.04	3.53702616353632e-19
A430046D13Rik	1.72747726163047e-15	2.05932	0.078	0.019	4.20347042072543e-11
Fam216a	2.95124873407707e-11	2.05815	0.063	0.017	7.18127354462973e-07
Lrfn4	3.46577925387616e-50	2.05386	0.243	0.058	8.43328065845685e-46
Jakmip1	9.76811118469374e-73	2.05291	0.391	0.107	2.37687449457153e-68
Cfap53	4.38030987283221e-13	2.04956	0.042	0.007	1.06586080135626e-08
Klhdc2	1.00345907509918e-88	2.04648	0.49	0.145	2.44171696743882e-84
Gm13056	3.35564845660459e-07	2.04495	0.042	0.012	0.0081653
Zfp296	1.55190692578589e-09	2.04464	0.04	0.009	3.77625512251481e-05
Fam124b	4.45288668710029e-31	2.04392	0.178	0.049	1.08352091757211e-26
Erc2	1.13336231919015e-23	2.04085	0.125	0.032	2.75781053128539e-19
Nudt19	1.15025953915222e-68	2.03714	0.469	0.165	2.7989265366191e-64
Tnfrsf19	3.29397350986069e-46	2.03673	0.315	0.101	8.01522574154402e-42
Ndufc2	2.13457552677453e-201	2.03525	0.96	0.634	5.19406262930047e-197
Gm49207	1.06349965608507e-08	2.03475	0.044	0.011	0.000258781
Cox6b2	6.66910064566495e-11	2.03445	0.068	0.02	1.62279226010965e-06
Mt2	1.41262021008519e-153	2.0335	0.848	0.317	3.4373287572003e-149
Cstpp1	4.14392576751515e-53	2.03139	0.247	0.056	1.00834145700946e-48
Gstp1	6.86231559868173e-70	2.0272	0.359	0.094	1.66980725462722e-65
Polr2h	8.82125795824076e-136	2.02597	0.761	0.301	2.14647669897872e-131
Sla	9.07730888311081e-14	2.02368	0.04	0.006	2.20878157052735e-09
Gm16576	5.30285600430884e-14	2.02105	0.066	0.016	1.29034395152847e-09
BC048679	3.25441327822468e-113	2.02046	0.584	0.166	7.91896382990412e-109
Med24	8.44580886599721e-150	2.01771	0.882	0.441	2.0551186713631e-145
Itpripl1	5.41841722303643e-59	2.01597	0.319	0.086	1.31846346288145e-54
Zfp40	4.98443753106385e-18	2.0144	0.089	0.021	1.21286318443377e-13
Zfyve9	2.88807205622956e-122	2.01426	0.742	0.285	7.02754573442338e-118
Id1	7.24332575330474e-108	2.01214	0.74	0.313	1.76251845555164e-103
Gcat	2.36804165578107e-30	2.00994	0.19	0.056	5.76215576101207e-26
Pdgfrl	8.87861801022666e-08	2.00984	0.032	0.007	0.00216043
Cabcoco1	9.36001142673236e-48	2.00978	0.275	0.075	2.27757158046679e-43
Tmem108	6.88482840420387e-48	2.00896	0.345	0.115	1.67528529559493e-43
Phgdh	7.30561271138988e-10	2.00771	0.053	0.014	1.7776747410625e-05
Elapor1	1.84116923201078e-91	2.00533	0.345	0.066	4.48011709225184e-87
Adh5	1.89942250631421e-126	2.00494	0.725	0.272	4.62186478461438e-122
Spry1	9.03654788650266e-62	2.00345	0.338	0.092	2.19886319722269e-57
Mtr	6.03388217034193e-90	2.00246	0.592	0.216	1.4682245485093e-85
4732490B19Rik	1.42040388199958e-34	1.99829	0.203	0.056	3.45626876606957e-30
Gm17173	1.61480665363114e-14	1.99788	0.065	0.014	3.92930903028065e-10
Apip	3.91329557906382e-35	1.98855	0.233	0.071	9.52222213253599e-31
Rangrf	4.06675488898814e-50	1.98564	0.264	0.069	9.89563467137484e-46
Tmem141	2.3934378962631e-55	1.98324	0.349	0.111	5.823952432977e-51
Stat5a	1.73417240318251e-92	1.98311	0.592	0.209	4.219761708664e-88
Akr1c19	1.16811619750316e-79	1.98105	0.465	0.14	2.84237714338445e-75
Fitm2	1.69177073180099e-39	1.98099	0.266	0.083	4.11658572169135e-35
Pdk2	1.98641051154771e-33	1.98042	0.214	0.064	4.83353269774905e-29
Zc3hav1l	4.93808174038028e-18	1.98004	0.083	0.019	1.20158342988673e-13
Ccdc189	5.84064772409651e-20	1.9793	0.135	0.041	1.4212048107044e-15
Decr1	1.90164185306897e-75	1.97859	0.404	0.112	4.62726512107273e-71
Arhgef10	5.04061548393179e-86	1.97688	0.465	0.13	1.22653296570512e-81
Zfp251	8.80457305539127e-39	1.97212	0.249	0.074	2.14241676156836e-34
Foxred2	7.69289542834631e-10	1.97201	0.057	0.016	1.87191224457951e-05
Scrn2	2.71034187607776e-23	1.97183	0.161	0.05	6.59507488706001e-19
Atp6v0d2	7.64528023074698e-13	1.97026	0.04	0.006	1.86032603854766e-08
Psat1	1.34694035575882e-72	1.96938	0.419	0.123	3.27750996766793e-68
Gulp1	6.24895305138232e-129	1.96738	0.723	0.234	1.52055774599286e-124
Gm56494	6.19495876044482e-08	1.96596	0.042	0.011	0.00150742
Snx22	2.79962284381817e-07	1.96556	0.023	0.004	0.00681232
Adgrl3	4.03821771799037e-166	1.95842	0.932	0.415	9.82619517318597e-162
Rdh11	2.61239173627005e-42	1.95324	0.319	0.11	6.35673281186591e-38
Gm13986	1.48562201295571e-10	1.95168	0.076	0.025	3.61496404412512e-06
Cfap300	5.60706462956194e-14	1.95089	0.07	0.017	1.36436703631131e-09
Frmd5	3.47514544783728e-18	1.94827	0.139	0.046	8.45607141822247e-14
Rab11fip4	8.65699779602294e-52	1.94755	0.304	0.086	2.10650727370626e-47
Fundc2	1.82716813597457e-111	1.94441	0.657	0.226	4.44604822526691e-107
Gm56721	1.24608695811023e-08	1.94103	0.03	0.006	0.00030321
Hsbp1l1	3.27565222490933e-09	1.93827	0.04	0.009	7.97064455887187e-05
Gper1	7.30873106849713e-26	1.93637	0.12	0.027	1.77843353089741e-21
Hspe1-rs1	2.65296169359188e-08	1.93459	0.049	0.015	0.000645545
Per2	6.19630080215118e-73	1.93435	0.425	0.122	1.50774587418745e-68
Pcbp4	4.22288944368643e-15	1.93123	0.089	0.025	1.02755568833222e-10
Arhgap18	1.2446974149606e-115	1.93007	0.713	0.264	3.02872221982362e-111
Crispld2	1.21273322564196e-09	1.92901	0.059	0.017	2.95094375795458e-05
Ncald	6.66743243761173e-123	1.92878	0.765	0.283	1.62238633504406e-118
Anxa9	9.27008463318744e-21	1.92735	0.116	0.03	2.2556896937935e-16
Tsc22d3	1.05216168069463e-130	1.92389	0.715	0.248	2.56022501763425e-126
Fgf18	5.44040529822162e-86	1.92247	0.472	0.133	1.32381382121627e-81
Ankrd6	1.00394806381563e-96	1.92205	0.603	0.206	2.44290682368258e-92
2810001G20Rik	2.44878429573483e-61	1.92159	0.366	0.109	5.95862682681156e-57
Iftap	5.43642712747922e-29	1.91814	0.197	0.061	1.32284581292952e-24
Prps2	9.40917475648985e-59	1.91671	0.342	0.097	2.28953449349667e-54
Fcsk	3.92764764304286e-55	1.9155	0.343	0.104	9.5571450098162e-51
Vkorc1	3.68371558693912e-57	1.91251	0.417	0.15	8.96358513769897e-53
Tpbg	1.2378370417947e-102	1.912	0.668	0.255	3.01202887379903e-98
Cox7a2l	2.69648250110429e-196	1.91074	0.943	0.675	6.56135086993706e-192
Asb1	2.7506956776047e-11	1.90977	0.057	0.014	6.69326779231551e-07
Tcf7l1	1.13070284700315e-104	1.90879	0.56	0.155	2.75133923761276e-100
Ryr3	1.2599715117342e-11	1.90546	0.093	0.032	3.06588867950282e-07
Tceal1	1.33040057578198e-17	1.90414	0.083	0.019	3.23726372105029e-13
Fpgs	1.7496678173569e-59	1.90341	0.332	0.093	4.25746669997454e-55
Idh2	4.18539012629538e-116	1.9028	0.696	0.248	1.01843097943145e-111
Zfp428	3.36531257570218e-25	1.89972	0.152	0.042	8.18881509045611e-21
Arl3	6.52656237249754e-85	1.8997	0.554	0.195	1.58810842209983e-80
Flvcr2	1.01512627096314e-07	1.89109	0.028	0.006	0.00247011
Dtd1	1.88907733140242e-67	1.88609	0.452	0.149	4.59669187050151e-63
Arhgdib	4.27112097626143e-44	1.88432	0.294	0.092	1.03929186715369e-39
Arhgef19	2.39692520047023e-53	1.8831	0.326	0.097	5.8324380903042e-49
Abhd14b	6.92085743605491e-52	1.87949	0.366	0.124	1.68405223991524e-47
Chsy1	3.39823785510404e-25	1.87889	0.137	0.035	8.26893217282466e-21
Actn1	7.4865947672526e-189	1.878	0.972	0.645	1.82171310471557e-184
Gpt2	3.6644124693289e-65	1.87604	0.435	0.142	8.91661486161802e-61
Adat2	5.62668025047303e-27	1.87566	0.19	0.061	1.3691401053476e-22
Fn1	6.27760240910769e-16	1.86791	0.083	0.021	1.52752899420818e-11
Dnajc18	4.06824959474685e-46	1.86641	0.269	0.075	9.89927173889752e-42
Ptk2b	1.48983352457656e-109	1.85979	0.865	0.541	3.62521191535214e-105
Zfp512b	3.89143671060216e-99	1.85767	0.516	0.144	9.46903294790822e-95
Gm17546	3.03892031725145e-15	1.85584	0.091	0.026	7.39460480796796e-11
Gm20703	2.460553706979e-07	1.85455	0.057	0.02	0.00598727
Tmem254	3.83180610063907e-141	1.85216	0.871	0.456	9.32393378468506e-137
Sdsl	2.97150280487264e-14	1.851	0.089	0.026	7.2305577750966e-10
Lrpap1	1.01018063916811e-145	1.84883	0.875	0.466	2.45807254928777e-141
Ydjc	3.16715523275645e-30	1.84388	0.199	0.06	7.70663882786628e-26
Prr5l	1.92859206226013e-15	1.84169	0.131	0.046	4.69284306509758e-11
Bmp1	1.50572341883313e-26	1.84129	0.203	0.068	3.66387679504666e-22
Cd200l1	7.93589296740825e-45	1.84008	0.266	0.074	1.93104083575945e-40
Rbm24	7.87187355187929e-52	1.84002	0.52	0.245	1.91546299137879e-47
Srd5a2	1.43732472714467e-09	1.83958	0.066	0.021	3.49744225856114e-05
Hps3	7.42507648407545e-68	1.83942	0.438	0.14	1.80674386087008e-63
9230105E05Rik	4.34759520651512e-20	1.83836	0.131	0.039	1.05790034160132e-15
Smyd5	1.1893171844163e-34	1.83766	0.205	0.057	2.89396550484019e-30
Ctsf	1.82646891899177e-21	1.83701	0.125	0.034	4.44434682058268e-17
Plac9	2.78283708424568e-12	1.83522	0.089	0.029	6.77147747709502e-08
Sys1	6.1678091241867e-120	1.83506	0.806	0.381	1.50081299418835e-115
Trmt61a	7.51152851582575e-22	1.8338	0.156	0.049	1.82778023375588e-17
Npm3	6.49711243023523e-88	1.83207	0.571	0.196	1.58094236764914e-83
2210408F21Rik	4.82124349247281e-21	1.83043	0.133	0.039	1.17315317902341e-16
Tppp3	4.25728914498588e-23	1.83038	0.152	0.045	1.03592616764941e-18
Zmpste24	3.07668587131675e-107	1.82923	0.822	0.458	7.48649973067505e-103
Ppp1r26	1.4307798245492e-11	1.82269	0.08	0.025	3.48151654707558e-07
Gm21814	2.13921423011629e-09	1.8218	0.068	0.023	5.20534998614196e-05
Tef	1.56431963400466e-39	1.82172	0.258	0.078	3.80645896542354e-35
Pkhd1	7.8102114328119e-120	1.82067	0.841	0.39	1.90045874794612e-115
Gm48094	6.74550894430757e-08	1.8195	0.049	0.015	0.00164138
Tmem229b	1.65125602766603e-41	1.81898	0.345	0.127	4.01800129211975e-37
Snrpn	3.14800124372592e-19	1.81897	0.157	0.056	7.66003142635828e-15
Cfap36	1.09249083553172e-53	1.81638	0.391	0.135	2.65835795009933e-49
Vsig10l	2.38144228092238e-07	1.81573	0.042	0.012	0.00579476
Krt80	2.7661353740915e-53	1.81399	0.357	0.112	6.73083720577686e-49
Irs1	1.4196424627993e-66	1.81001	0.554	0.226	3.45441600472954e-62
Polr3h	9.55959052653406e-57	1.80706	0.406	0.142	2.32613516282153e-52
Maged1	1.14410765758461e-100	1.80513	0.655	0.241	2.78395716320062e-96
A430018G15Rik	3.94163147784113e-20	1.8049	0.102	0.025	9.59117187503082e-16
Lypd2	6.2377674527259e-15	1.80188	0.12	0.041	1.51783595427179e-10
Dclk3	6.95531995871342e-11	1.79999	0.066	0.019	1.69243800555374e-06
Zfp599	8.61786580787216e-38	1.79964	0.233	0.067	2.09698528702953e-33
Fbxl7	6.5203262003966e-26	1.79871	0.159	0.045	1.5865909743425e-21
Cldn10	1.01922352573133e-101	1.79709	0.761	0.352	2.48007660516205e-97
Jpx	2.33884475162291e-18	1.79633	0.161	0.059	5.69111093412402e-14
Tgif2	1.86876176734811e-27	1.79404	0.222	0.078	4.54725800848815e-23
P4htm	1.35796799318801e-08	1.79309	0.03	0.006	0.000330434
Cdkn1c	3.24549025923592e-21	1.79293	0.114	0.029	7.89725144779877e-17
Krt17	1.5061752174485e-11	1.78978	0.051	0.012	3.66497615661744e-07
Cdh4	2.51991701045088e-92	1.78856	0.759	0.352	6.13171406153013e-88
Gm42595	1.00379115691142e-11	1.78684	0.068	0.019	2.44252502211255e-07
Hgh1	3.7137735678531e-24	1.78408	0.182	0.06	9.03672522265694e-20
Socs7	5.80401693861472e-77	1.78352	0.632	0.281	1.41229144167312e-72
Slc29a2	1.53603705828291e-09	1.78152	0.068	0.022	3.73763897391979e-05
Nes	3.68127934210056e-07	1.77826	0.042	0.012	0.00895766
Ccdc146	2.13551626961803e-10	1.7781	0.078	0.026	5.19635173886155e-06
Snx8	5.09318063812893e-62	1.77757	0.425	0.141	1.23932364467591e-57
Grwd1	1.32383068043787e-53	1.77501	0.37	0.123	3.22127719470946e-49
Nmral1	8.73596401956585e-39	1.77451	0.254	0.078	2.12572212488096e-34
Pgrmc1	6.18934237242779e-130	1.77141	0.852	0.448	1.50605267948285e-125
Zfp940	3.51160448165181e-11	1.7693	0.089	0.031	8.54478718520335e-07
Gsta4	3.08244981764134e-132	1.76891	0.858	0.423	7.50052514126668e-128
Pgr	1.27681629802299e-132	1.76886	0.915	0.548	3.10687709797934e-128
Acss1	8.00049448019412e-91	1.76683	0.795	0.442	1.94676032186563e-86
Efemp1	8.46585885681987e-47	1.76516	0.307	0.095	2.05999743562998e-42
Dnaja1	5.88542403859739e-211	1.76456	0.97	0.822	1.4321002313119e-206
Greb1	1.66276688757211e-67	1.76377	0.548	0.216	4.04601066752921e-63
Cndp2	8.0234132246024e-198	1.75868	0.972	0.751	1.9523371399425e-193
Flot2	1.81168934319139e-40	1.75797	0.302	0.1	4.4083836787876e-36
Cbx6	1.6472596763401e-99	1.75694	0.696	0.278	4.00827697043837e-95
Ippk	1.57227958070327e-79	1.75584	0.664	0.304	3.82582790372526e-75
Gm49417	3.07831749643567e-08	1.75402	0.066	0.024	0.000749047
Ppargc1a	8.41690268882391e-37	1.75377	0.233	0.067	2.04808493127152e-32
Slc6a6	2.19346159162135e-150	1.75296	0.928	0.536	5.33735009089224e-146
Tmem42	1.89706581251171e-34	1.75118	0.231	0.071	4.61613024158474e-30
Ift27	1.36199172037497e-23	1.75019	0.218	0.083	3.31413445318841e-19
Dzip1	2.6586405562751e-09	1.7483	0.059	0.018	6.4692700655842e-05
Sybu	3.07068222081599e-38	1.74369	0.243	0.07	7.47189104791154e-34
Mcrip2	8.89069176866667e-32	1.74317	0.226	0.073	2.16337202806966e-27
Cat	6.32349924028897e-38	1.74289	0.288	0.101	1.53869707013951e-33
Hadh	2.83506673055323e-84	1.74164	0.666	0.294	6.89856787545519e-80
Snhg4	2.3460807041361e-88	1.74137	0.569	0.196	5.70871817737436e-84
Mapre3	6.929380600813e-38	1.74046	0.214	0.057	1.68612618159583e-33
Fah	2.32036833272019e-08	1.73993	0.051	0.015	0.000564615
Tmem237	3.02406257041876e-13	1.73986	0.083	0.024	7.35845145259996e-09
Eif2ak4	2.14942655883866e-92	1.73973	0.668	0.267	5.23019964562212e-88
Rassf9	8.11899093057674e-44	1.73866	0.336	0.117	1.97559406313724e-39
Eef1akmt2	2.53089280006655e-29	1.73804	0.237	0.084	6.15842145040195e-25
Zfp467	9.23974597063399e-44	1.73728	0.385	0.152	2.24830738703437e-39
Impdh2	2.72939823938714e-136	1.73686	0.85	0.406	6.64144473590072e-132
As3mt	8.95980490025585e-17	1.73608	0.12	0.038	2.18018932637926e-12
S100a1	2.09358199140746e-58	1.73575	0.497	0.202	5.09431305969177e-54
Rrp12	1.74270031094867e-43	1.7345	0.298	0.093	4.24051266663139e-39
Bhlhb9	1.93156292495183e-29	1.73304	0.23	0.079	4.70007206528528e-25
Trmt112	1.58759481133615e-137	1.73238	0.867	0.453	3.86309445442425e-133
Gm34643	2.99922768217135e-12	1.72952	0.023	0.002	7.29802071902754e-08
1810014B01Rik	1.03368547682384e-15	1.72913	0.116	0.038	2.51526687075545e-11
Tmed1	2.52204605675136e-27	1.72793	0.209	0.071	6.13689466989308e-23
Spata24	4.10285234851188e-29	1.72543	0.22	0.074	9.98347061963396e-25
4930433N12Rik	2.03445310442327e-07	1.7251	0.055	0.019	0.00495043
1500012K07Rik	3.70395630647782e-17	1.72388	0.114	0.035	9.01283688055249e-13
Sox11	1.08851509893286e-09	1.72239	0.047	0.012	2.64868379023333e-05
Zhx1	4.58023643047889e-42	1.71792	0.281	0.088	1.11450893062843e-37
Arvcf	4.17774273811493e-20	1.71708	0.116	0.031	1.01657014046551e-15
Kctd12	3.86174891200433e-28	1.717	0.194	0.061	9.39679362758012e-24
Nde1	1.46326815129771e-45	1.71227	0.313	0.1	3.56057039255271e-41
Chdh	1.48454039285983e-158	1.70867	0.962	0.66	3.61233213794583e-154
Mcm2	4.42249591497719e-66	1.70867	0.446	0.146	1.0761259309914e-61
Prag1	2.60094424008118e-75	1.70643	0.638	0.284	6.32887761938954e-71
Tmem123	1.36100239093776e-135	1.70434	0.909	0.58	3.31172711786885e-131
Neb	2.34167108295513e-11	1.70379	0.078	0.024	5.69798824615473e-07
Nit2	2.67738610123506e-61	1.70194	0.474	0.182	6.51488360013526e-57
Dkc1	5.88772287740362e-94	1.70168	0.704	0.298	1.43265960775862e-89
Dst	4.5295073643807e-138	1.70167	0.934	0.584	1.10216502697476e-133
Hmgn3	6.24090300082654e-36	1.70119	0.249	0.078	1.51859892719112e-31
Glrx5	1.65921324620902e-112	1.69801	0.814	0.393	4.03736359200041e-108
Wdr31	4.58299992078241e-16	1.69748	0.083	0.021	1.11518137072398e-11
Ggnbp1	2.02160664225113e-07	1.69334	0.083	0.035	0.00491918
Camkk1	1.4567993883912e-08	1.69105	0.049	0.014	0.000354483
4933424G05Rik	1.47058720212028e-60	1.6909	0.44	0.151	3.57837983891929e-56
Tsr2	5.51082173401754e-29	1.69088	0.22	0.074	1.34094825253849e-24
Paics	9.19893693809451e-146	1.69038	0.894	0.449	2.23837732514654e-141
Frmd4a	3.45299351454096e-68	1.68923	0.586	0.249	8.40216911893253e-64
Tspan13	3.9322013508412e-07	1.68912	0.049	0.016	0.00956823
Tmem44	1.11192484153089e-40	1.68838	0.296	0.096	2.70564671689712e-36
Tulp3	7.8171008417234e-21	1.68715	0.197	0.076	1.90213514781655e-16
Prodh	3.31026177932153e-38	1.68416	0.304	0.108	8.05485998762307e-34
Pdf	7.55992662558668e-10	1.67806	0.051	0.013	1.83955694580401e-05
Tacc1	3.38512945111415e-94	1.67628	0.806	0.439	8.23703549339607e-90
Usp2	2.71400710649188e-08	1.67575	0.076	0.029	0.000660399
Hmgn1	2.89712414817866e-155	1.67547	0.928	0.581	7.04957218976314e-151
Tprkb	6.48290660864022e-20	1.67501	0.22	0.093	1.57748566508043e-15
Dlg4	3.682216684501e-35	1.67158	0.233	0.07	8.95993785839629e-31
Lipt1	1.71984038205528e-09	1.67013	0.093	0.037	4.18488760165511e-05
Prrg1	1.19048147488287e-43	1.66864	0.294	0.09	2.89679857283249e-39
Zfp882	2.79551518951726e-08	1.66671	0.07	0.026	0.000680233
Gm56714	3.10708246097097e-29	1.66644	0.25	0.09	7.56046375228066e-25
Rnf24	1.14947576544161e-97	1.66571	0.806	0.43	2.79701938004907e-93
ENSMUSG00000121477	9.59724955458657e-35	1.6651	0.292	0.107	2.33529873411755e-30
Sfi1	2.50158376407412e-100	1.66448	0.791	0.412	6.08710377312156e-96
Srm	2.40579074038482e-50	1.66434	0.376	0.131	5.85401060857837e-46
Gas5	1.09690892910247e-161	1.66409	0.945	0.629	2.66910849718504e-157
Aspa	2.37227528419802e-63	1.66367	0.48	0.173	5.77245744903905e-59
Tmem191	3.4206420475311e-12	1.65883	0.082	0.025	8.32344829425743e-08
Tagap	1.82124864287508e-30	1.65759	0.194	0.057	4.43164432270794e-26
Gclc	1.37350970079002e-88	1.65751	0.776	0.401	3.34216115493237e-84
Ndufaf6	9.44000132276992e-50	1.65632	0.391	0.139	2.2970355218696e-45
Gm37587	2.44568202594407e-15	1.65585	0.101	0.03	5.95107807372971e-11
Tst	3.03008482126205e-51	1.6543	0.433	0.169	7.37310539557695e-47
Dgkh	1.14093534865276e-87	1.65384	0.877	0.553	2.77623798387675e-83
Slc25a23	9.46165744345446e-21	1.65375	0.142	0.044	2.30230510571577e-16
1500011B03Rik	2.59027596123037e-48	1.65365	0.429	0.173	6.30291849646186e-44
Snhg10	1.46500768749553e-09	1.6521	0.066	0.021	3.56480320598288e-05
Pdzd4	3.17943304222497e-07	1.65053	0.049	0.016	0.00773651
Gm32960	1.56798868165007e-30	1.65	0.264	0.096	3.81538685905912e-26
Pgap4	1.70773646959642e-28	1.64875	0.216	0.073	4.15543515146897e-24
Hspg2	3.93868997606096e-73	1.64742	0.524	0.188	9.58401431874914e-69
Cry2	4.48224998657676e-36	1.64478	0.281	0.096	1.09066588923372e-31
Plxnb1	8.29601748387147e-47	1.64424	0.34	0.111	2.01866993435045e-42
Rab15	2.07117648877579e-63	1.64138	0.471	0.168	5.03979375013814e-59
2010204K13Rik	6.60573578113251e-17	1.63878	0.142	0.051	1.60737368762297e-12
Akr1e1	2.89746793128924e-63	1.63804	0.548	0.23	7.05040871720611e-59
Zfp72	1.73603097096181e-13	1.63784	0.131	0.051	4.22428416164137e-09
Gcnt2	1.48198098157625e-175	1.63775	0.991	0.843	3.6061043224695e-171
A130010J15Rik	3.27792382731836e-23	1.6373	0.19	0.066	7.97617204901377e-19
Hmgn2-ps	1.39014586099053e-10	1.63718	0.083	0.029	3.38264192354827e-06
Gm29538	1.15542887538879e-33	1.63669	0.231	0.072	2.81150508248355e-29
Cisd3	9.89072428965566e-14	1.63614	0.102	0.034	2.40670994140191e-09
Gm9895	5.33974705719103e-35	1.63613	0.357	0.149	1.29932065142629e-30
Hnrnpll	1.43056189787479e-89	1.63605	0.863	0.582	3.48098626609873e-85
Fkbp3	1.56876165540059e-118	1.63574	0.85	0.44	3.81726773608626e-114
Gm16136	2.01140835248799e-42	1.6349	0.381	0.152	4.89435994410903e-38
Gm30414	8.25532152200118e-36	1.63273	0.334	0.133	2.00876738594855e-31
Hsd17b10	6.00628325769335e-96	1.63222	0.712	0.307	1.46150890509452e-91
Lgr5	3.41333687564588e-58	1.62935	0.416	0.135	8.30567261950913e-54
Mphosph8	1.89267177959091e-139	1.62901	0.949	0.656	4.60543824127856e-135
Ptges3l	6.90773679943565e-08	1.62821	0.074	0.029	0.00168086
Zdhhc1	2.61146618227186e-48	1.6279	0.383	0.136	6.35448066132212e-44
Dctd	2.94448558282331e-52	1.62768	0.438	0.168	7.16481676868396e-48
Ifitm2	3.33928470209405e-169	1.62679	0.949	0.689	8.12548146560545e-165
Wdr46	3.18303425024971e-49	1.62305	0.414	0.158	7.74527724113261e-45
Maged2	2.49807603477394e-40	1.62206	0.334	0.123	6.07856841541542e-36
Gm5148	1.7811231010535e-16	1.62043	0.091	0.024	4.33400684179349e-12
Rusc1	1.13962204315036e-25	1.61848	0.241	0.093	2.77304231759778e-21
Ksr2	9.43422339337391e-14	1.61702	0.104	0.035	2.29562957830967e-09
Ddah1	5.69908732164986e-25	1.61696	0.211	0.076	1.38675891797706e-20
Tmem218	3.79798659069586e-09	1.61684	0.076	0.028	9.24164077114024e-05
Arl2bp	5.49167049767563e-87	1.61402	0.74	0.369	1.33628818219941e-82
Dnajc28	6.27379183360319e-16	1.6133	0.161	0.064	1.52660176687067e-11
Ifitm3	1.65523313345229e-188	1.61296	0.977	0.799	4.02767878362946e-184
Myd88	3.51776512954115e-46	1.61274	0.503	0.243	8.55977788971248e-42
Fads2b	2.07041648426921e-157	1.61205	0.989	0.744	5.03794443117227e-153
Nt5c3b	7.98606934521305e-44	1.61167	0.37	0.138	1.94325025377069e-39
Ppat	2.15670981915835e-93	1.61052	0.689	0.274	5.24792200295802e-89
Pck1	4.00749683919399e-23	1.60812	0.144	0.041	9.75144205881075e-19
Cmtm7	9.54531620371954e-59	1.60486	0.467	0.172	2.32266179185108e-54
Panct2	2.1738467973804e-32	1.60371	0.245	0.083	5.28962141206572e-28
Gabbr1	1.1848695411064e-49	1.60089	0.361	0.119	2.8831430543742e-45
Slc50a1	7.83013638925412e-62	1.59998	0.497	0.189	1.90530708759721e-57
Arl4c	2.77721831841893e-157	1.59994	0.945	0.701	6.75780533420878e-153
Iah1	2.23608675205729e-29	1.59979	0.347	0.159	5.44106989378101e-25
Cdc14b	1.44643083398709e-71	1.59791	0.645	0.292	3.51960014834079e-67
Otulinl	1.79816194883748e-07	1.59728	0.057	0.02	0.00437547
Ctf1	5.61895910065463e-26	1.59557	0.258	0.105	1.36726131796229e-21
Stim1	3.19872952508568e-69	1.5947	0.63	0.286	7.783468553391e-65
Gm56577	5.78913629928992e-13	1.59315	0.108	0.038	1.40867053570622e-08
Auts2	6.4401635379974e-125	1.593	0.973	0.732	1.56708499370091e-120
Arhgap42	2.56293928027664e-150	1.59005	0.96	0.7	6.23640015069715e-146
Prmt1	3.36648988522238e-120	1.58908	0.85	0.434	8.19167983771161e-116
2410006H16Rik	6.52605979107109e-103	1.5874	0.852	0.508	1.58798612896133e-98
Lysmd2	2.95679169290902e-39	1.58664	0.304	0.104	7.19476122635553e-35
Magohb	9.81198847377005e-56	1.58588	0.438	0.161	2.38755115532247e-51
Ntm	9.92755107967343e-08	1.58486	0.15	0.082	0.00241567
Rhod	1.23580820321462e-12	1.58346	0.097	0.033	3.00709210088214e-08
Rpp38	1.39451911003979e-30	1.58241	0.288	0.115	3.39328335045982e-26
Ptger2	1.12093404394915e-32	1.58201	0.23	0.072	2.72756880914147e-28
Kti12	1.21265768982964e-46	1.58183	0.397	0.155	2.95075995666245e-42
Bex3	1.2975615778907e-46	1.58035	0.398	0.149	3.15735658748143e-42
Krba1	4.63576230267446e-15	1.57763	0.123	0.043	1.12802004110978e-10
Ppp3cc	6.68749241804085e-74	1.57667	0.658	0.296	1.62726753008188e-69
Mthfd1	1.15967579582124e-74	1.57497	0.641	0.281	2.82183911397182e-70
Atic	7.49742388316542e-114	1.57452	0.837	0.448	1.82434815349064e-109
Siva1	9.08915885100749e-51	1.5742	0.404	0.146	2.21166502321565e-46
Dse	7.16343730138349e-29	1.56947	0.245	0.087	1.74307919854564e-24
Extl2	6.72801982654899e-27	1.56896	0.264	0.105	1.63712906439416e-22
Gga2	6.52101078556179e-19	1.56819	0.169	0.061	1.58675755445075e-14
Kantr	4.49390299002903e-20	1.56815	0.173	0.062	1.09350141456376e-15
Alkbh8	5.89597120935142e-88	1.56778	0.74	0.346	1.43466667437148e-83
Nav2	1.59808857445911e-186	1.56703	0.996	0.832	3.88862892823135e-182
Tfcp2l1	1.02736375613027e-136	1.56692	0.973	0.722	2.49988422779179e-132
Cyb5b	2.76686756223812e-136	1.56692	0.93	0.58	6.73261883919401e-132
Tbc1d16	2.30139206019566e-58	1.56665	0.383	0.118	5.59997730007411e-54
Wdr77	6.17182759730236e-90	1.56648	0.715	0.318	1.50179080925158e-85
Ap1s3	1.76286145951969e-72	1.56636	0.75	0.394	4.28957078944925e-68
Hspe1	2.32030567824976e-148	1.56487	0.932	0.589	5.64599980688513e-144
Gucy1a2	3.76348283087193e-08	1.56465	0.065	0.023	0.000915768
S100a6	9.92214685958769e-134	1.5634	0.888	0.4	2.41435599534347e-129
Slc52a2	4.45820825557983e-34	1.56279	0.264	0.09	1.08481581483024e-29
Phpt1	2.10707753318196e-40	1.56251	0.332	0.122	5.12715176149166e-36
Tle2	8.73713308975528e-21	1.56208	0.135	0.039	2.12600659473015e-16
Heatr3	9.47186711487249e-60	1.55887	0.474	0.178	2.30478942506192e-55
Clcn5	1.11026714181972e-42	1.55855	0.742	0.547	2.70161303618992e-38
Parp1	3.9628345247351e-93	1.55814	0.734	0.345	9.64276524903792e-89
Skida1	2.60511577719351e-19	1.55732	0.142	0.046	6.33902822064497e-15
Zfp459	2.90688780704405e-15	1.55715	0.142	0.054	7.07333010088029e-11
Fbl	4.631886967841e-125	1.55632	0.892	0.5	1.12707705588475e-120
Gpc6	3.51566619609043e-63	1.55557	0.334	0.084	8.55467055494683e-59
Dtymk	4.50393342929104e-101	1.55324	0.769	0.354	1.09594212134939e-96
Sardh	1.23675271076137e-16	1.55073	0.133	0.046	3.00939037109563e-12
Mars2	7.362758155804e-16	1.54919	0.159	0.063	1.79157994205179e-11
Fsd1l	1.25563785968692e-82	1.54879	0.698	0.304	3.05534360397619e-78
Jazf1	6.13457530412991e-61	1.54836	0.499	0.188	1.49272620875393e-56
Gm42941	1.1574695273707e-41	1.54751	0.395	0.158	2.81647060095113e-37
Timm10	3.72040597248843e-57	1.54573	0.497	0.204	9.05286385285609e-53
Snhg12	1.24792010988908e-68	1.54511	0.518	0.195	3.03656400339309e-64
Gpm6b	4.04634801952019e-62	1.54413	0.52	0.2	9.84597863589847e-58
Bace1	2.18578528942234e-17	1.54386	0.144	0.05	5.31867134475137e-13
Galnt18	7.14761831355108e-74	1.54298	0.691	0.324	1.73922996423638e-69
Gpatch4	5.17235944418789e-82	1.54221	0.655	0.267	1.25859022355424e-77
Ipo4	1.12821235780334e-45	1.54124	0.362	0.131	2.74527913024286e-41
Rpl3	7.57531907146035e-205	1.54103	0.981	0.844	1.84330238965845e-200
Zfp937	3.1625695839855e-18	1.54026	0.144	0.049	7.69548056871191e-14
Pcolce	1.61861263603634e-08	1.53896	0.051	0.015	0.000393857
Nudt14	1.49777976456146e-64	1.53802	0.579	0.255	3.6445475011074e-60
Gm35572	1.56041754231061e-09	1.53703	0.063	0.019	3.7969640057044e-05
2310061I04Rik	2.97239313355368e-26	1.53625	0.237	0.089	7.23272421187616e-22
Ifrd2	9.9631776192298e-67	1.53555	0.526	0.201	2.42434001008719e-62
Plekhs1	6.59340167101515e-145	1.53549	0.972	0.636	1.60437242860812e-140
E2f6	4.89804968238708e-29	1.53538	0.351	0.16	1.19184242921525e-24
Lage3	4.56533023851982e-66	1.53437	0.579	0.251	1.11088180693903e-61
Glo1	1.44228005633495e-97	1.5321	0.805	0.413	3.50950006107983e-93
Cebpzos	2.27909035373243e-56	1.53194	0.52	0.226	5.54571055773712e-52
Marcksl1	2.66348875535986e-120	1.53131	0.89	0.554	6.48106718841716e-116
Tnfrsf21	4.1256656444995e-79	1.52786	0.848	0.548	1.00389822127606e-74
Akr1c13	3.94992035526655e-29	1.52617	0.266	0.1	9.6113412004701e-25
Apex1	1.40299866804344e-103	1.52471	0.814	0.381	3.4139166589501e-99
Large2	3.13660078289148e-46	1.52277	0.332	0.109	7.63229068500985e-42
Fam131c	6.3472794149425e-12	1.5221	0.065	0.017	1.54448350003796e-07
Stard5	1.64133414099074e-40	1.52199	0.567	0.329	3.99385836527277e-36
Ankrd46	5.60649808655325e-57	1.52128	0.463	0.177	1.364229179401e-52
Aasdhppt	2.72677663724945e-75	1.52128	0.683	0.325	6.63506559141909e-71
Mettl26	9.46614074173111e-71	1.52089	0.611	0.265	2.30339602668543e-66
Poc5	1.99958707000858e-42	1.51932	0.357	0.13	4.86559521745189e-38
Gm26705	2.27808423561768e-07	1.51922	0.051	0.017	0.00554326
1810034E14Rik	9.299039826712e-15	1.51616	0.099	0.03	2.26273536103383e-10
Grb10	5.72382963587156e-102	1.51576	0.873	0.55	1.39277946529663e-97
Agpat4	7.25577461566083e-41	1.51496	0.469	0.216	1.76554763722875e-36
Gm36723	5.48129941903923e-13	1.51454	0.053	0.011	1.33376458763482e-08
Fkbp4	2.73263575907147e-146	1.51399	0.937	0.621	6.64932259254861e-142
Rrp8	2.59815322635302e-52	1.51379	0.455	0.179	6.32208624568479e-48
Surf2	3.63269859062885e-36	1.51351	0.349	0.144	8.83944548057719e-32
Mapk12	1.42066929844051e-12	1.51334	0.131	0.053	3.45691460389529e-08
Cad	1.53397357603742e-26	1.51249	0.243	0.092	3.73261790257185e-22
Pmvk	2.39925793517085e-45	1.51045	0.499	0.228	5.83811433365124e-41
Msrb2	1.15472752027365e-15	1.50985	0.106	0.033	2.80979847508186e-11
Bysl	1.8273388435744e-44	1.50941	0.359	0.132	4.44646360806958e-40
Rab39	3.2925661859428e-07	1.50912	0.063	0.024	0.0080118
Sdr39u1	1.89164409101271e-22	1.50692	0.201	0.074	4.60293756666122e-18
Aarsd1	1.04110962081403e-47	1.50664	0.461	0.197	2.53333204032678e-43
Uqcc6	8.4317965895004e-34	1.50487	0.345	0.146	2.05170906412313e-29
Psen2	7.34917781851441e-37	1.50483	0.309	0.114	1.78827543857911e-32
Far1os	1.19435789415375e-11	1.50374	0.123	0.051	2.90623106384432e-07
Rrp9	2.42171477485105e-39	1.50184	0.389	0.161	5.89275856164505e-35
Bicd1	5.98335428467475e-89	1.50143	0.795	0.388	1.45592959808991e-84
Glb1l	1.01692724182642e-10	1.50041	0.099	0.037	2.47448905753624e-06
Tmem8b	9.68517893242521e-09	1.49997	0.046	0.012	0.000235669
Psmg2	7.93862046327491e-60	1.49936	0.539	0.229	1.93170451732868e-55
Ucp2	1.39029888807398e-135	1.4992	0.93	0.605	3.38301428435041e-131
Mpc2	2.19199261413431e-102	1.49888	0.833	0.459	5.33377562797301e-98
Fam229b	9.79610116473663e-09	1.49666	0.04	0.01	0.000238369
Psmd3	2.8125729654068e-151	1.49617	0.939	0.675	6.84383379672436e-147
Hspd1	9.67769543813824e-158	1.49566	0.962	0.703	2.35487363096218e-153
Nutf2-ps1	4.40875299920905e-18	1.49474	0.192	0.079	1.07278186729754e-13
Mrpl41	3.55542114084189e-55	1.49438	0.529	0.231	8.65140626201058e-51
2510002D24Rik	7.32647347550206e-74	1.49385	0.641	0.297	1.78275079079392e-69
Ccdc28b	7.97617686331027e-24	1.49353	0.249	0.102	1.94084311614929e-19
Tfap4	7.8741817957238e-33	1.49218	0.279	0.101	1.91602465635347e-28
Cenpx	1.04188035683238e-38	1.48927	0.391	0.166	2.53520747228023e-34
Tbc1d8	6.02905656484671e-60	1.48891	0.529	0.215	1.46705033392415e-55
Sfxn2	7.37648451499895e-13	1.48792	0.148	0.063	1.79491997703469e-08
Ica1	1.13648971260692e-76	1.48789	0.702	0.335	2.76542041768641e-72
Rpl12	5.01000998996673e-195	1.48711	0.975	0.846	1.21908573085861e-190
Ndufaf4	1.15543927699037e-71	1.48622	0.641	0.28	2.81153039270068e-67
Zfp763	5.16290247736373e-09	1.48592	0.099	0.041	0.000125629
Slc44a3	1.25249416412696e-39	1.48582	0.357	0.136	3.04769404957013e-35
Gfod1	2.04889861465847e-51	1.48424	0.573	0.274	4.98558499904846e-47
Klhl29	7.11349376332497e-17	1.48376	0.148	0.053	1.73092643742986e-12
Evl	4.92523434397486e-19	1.48347	0.146	0.048	1.1984572729194e-14
Fgfr2	5.53902865177619e-108	1.48264	0.932	0.697	1.3478118418367e-103
Trim24	5.9640467438703e-97	1.48247	0.877	0.541	1.45123149418596e-92
Bphl	1.6763360171939e-51	1.48187	0.503	0.222	4.07902843063791e-47
Pigh	1.51687460757319e-32	1.48096	0.347	0.145	3.69101098260784e-28
1700037H04Rik	5.8534253359033e-60	1.47924	0.558	0.245	1.42431398698535e-55
Per1	1.01607636231891e-39	1.47766	0.321	0.113	2.47241861243061e-35
Irf6	2.57438462442315e-99	1.477	0.86	0.52	6.26425010660886e-95
Rps3a1	4.58462270190823e-212	1.47598	0.991	0.886	1.11557624205533e-207
Zfp709	1.13527818117306e-09	1.4754	0.121	0.054	2.76247239824841e-05
Gm43376	2.97604347329174e-07	1.47528	0.051	0.017	0.00724161
Hsd17b8	1.13794497981744e-27	1.47377	0.273	0.11	2.76896151938978e-23
Atp2b4	1.54248282786303e-19	1.47338	0.106	0.027	3.75332346503912e-15
Mppe1	6.25256328802512e-40	1.47262	0.362	0.141	1.52143622487515e-35
Xrcc5	1.59545281856796e-79	1.47187	0.71	0.33	3.88221534342142e-75
Pde7a	6.85592607522193e-100	1.47041	0.939	0.783	1.66825249188375e-95
Rrp15	1.12063126665475e-73	1.4688	0.634	0.272	2.72683206115099e-69
S100pbp	1.6346749511262e-56	1.46766	0.562	0.248	3.97765455857538e-52
Afap1l1	3.05086071619473e-21	1.4667	0.171	0.059	7.42365938071665e-17
Bag5	8.60737353072588e-53	1.46603	0.541	0.251	2.09443220123153e-48
Mtss2	8.19696071672072e-40	1.46522	0.298	0.1	1.99456645119965e-35
Gpam	1.57514082459653e-56	1.46376	0.56	0.25	3.83279016849073e-52
Trerf1	7.00109307612921e-76	1.46307	0.742	0.365	1.70357597821452e-71
Elovl5	7.16755241221943e-142	1.46195	0.968	0.802	1.74408052846535e-137
Bckdhb	2.58713110162906e-59	1.46033	0.52	0.209	6.295266109594e-55
Erlin1	9.18898202707885e-42	1.45947	0.425	0.179	2.2359549966491e-37
Slc7a1	2.61428462582947e-93	1.45853	0.829	0.442	6.36133878003085e-89
9030404E10Rik	1.14130442276476e-08	1.4582	0.044	0.011	0.000277714
Wdr6	3.13679378262622e-35	1.45819	0.317	0.121	7.63276031126439e-31
Gm5141	1.83575424548662e-11	1.45796	0.08	0.025	4.4669408055426e-07
Hmbs	3.65935855946233e-48	1.45622	0.497	0.222	8.90431718273968e-44
Gm16093	1.11408716096328e-12	1.45592	0.173	0.079	2.71090828877195e-08
Impdh1	2.9222500187655e-15	1.45561	0.14	0.053	7.1107109706621e-11
Med7	1.34955065831466e-58	1.45533	0.594	0.295	3.28386161687706e-54
Rbbp9	5.19051015598983e-59	1.4541	0.581	0.264	1.26300683625701e-54
Mxd4	5.4706339000742e-73	1.45219	0.687	0.348	1.33116934690506e-68
Nip7	2.11379825479908e-67	1.44961	0.664	0.332	5.14350529340259e-63
Fra10ac1	4.85999405464586e-61	1.44959	0.596	0.271	1.18258235331698e-56
Gm16124	5.09535601767938e-18	1.44888	0.176	0.068	1.23985297978192e-13
Rida	2.60494749485209e-35	1.44697	0.343	0.138	6.33861873922359e-31
Gatd3a	2.3935599827611e-29	1.44327	0.304	0.127	5.82424950605259e-25
Calcrl	8.91651979421219e-08	1.44307	0.059	0.02	0.00216966
Snhg8	1.10777247858915e-72	1.44208	0.611	0.263	2.69554277215098e-68
Psmg1	3.30968607451463e-47	1.44107	0.484	0.215	8.05345912511646e-43
Snhg15	6.0345338580761e-26	1.44022	0.249	0.097	1.46838312368566e-21
Ctsd	1.63675886899563e-111	1.43901	0.966	0.873	3.98272535592706e-107
Shmt1	3.37232236547952e-65	1.43872	0.605	0.272	8.20587201192131e-61
Selenoh	1.38161288357209e-72	1.43869	0.643	0.284	3.36187862959597e-68
Eif3i	1.31004664902576e-125	1.43701	0.915	0.595	3.18773651107439e-121
Wdr83os	2.07457757231183e-74	1.43478	0.727	0.376	5.04806960670636e-70
Fzd6	8.89424727171122e-73	1.43475	0.786	0.468	2.16423718862549e-68
Exosc2	2.41231006611304e-24	1.43423	0.281	0.122	5.86987408387285e-20
Nol6	2.43122538539406e-34	1.43356	0.338	0.138	5.91590073027937e-30
Man2a2	3.63896971392102e-15	1.4335	0.144	0.055	8.85470500488402e-11
Gm15738	1.42717479537393e-11	1.43215	0.116	0.046	3.47274442958337e-07
Ap4s1	1.12787958785262e-55	1.43062	0.501	0.2	2.74446940112179e-51
Gm14305	5.41583406269737e-17	1.43042	0.137	0.047	1.31783490247615e-12
Sun2	3.74436739984413e-22	1.43004	0.18	0.062	9.11116919404072e-18
Pdp2	7.32939245834165e-17	1.43	0.197	0.085	1.78346106688827e-12
Mccc2	1.58375304058915e-44	1.42979	0.505	0.235	3.85374627366558e-40
Nop16	1.27255213632944e-70	1.42903	0.683	0.334	3.09650111333043e-66
Platr25	4.66951495756021e-14	1.4271	0.18	0.081	1.13623307462313e-09
Spef1	3.58377725679427e-14	1.42582	0.146	0.058	8.7204051989575e-10
Bcat2	8.34785814656834e-39	1.42552	0.41	0.18	2.03128432280448e-34
Nifk	7.26370586989672e-83	1.42543	0.75	0.379	1.76747754932197e-78
Rdh13	4.90552114251284e-22	1.42524	0.258	0.114	1.19366045960765e-17
Zfp267	2.37787413185132e-31	1.42342	0.249	0.085	5.78608112503381e-27
Arsg	6.3840957166081e-22	1.42342	0.245	0.103	1.55344201072225e-17
Fkbp9	2.23438437503562e-09	1.42303	0.11	0.047	5.43692749977418e-05
Dusp7	1.49890812603221e-27	1.42285	0.243	0.09	3.64729314307417e-23
Mrto4	1.05810378792229e-61	1.42214	0.577	0.254	2.5746839471513e-57
Trub1	1.62665935572278e-45	1.42184	0.41	0.163	3.95815021028024e-41
Ska2	3.70501277800037e-13	1.42125	0.176	0.081	9.01540759270829e-09
Haus8	1.7506937881594e-29	1.42048	0.294	0.117	4.25996319472826e-25
Cln5	6.85602570981273e-32	1.42043	0.469	0.246	1.66827673596873e-27
Acyp1	5.34288957041179e-37	1.41972	0.378	0.157	1.3000853191683e-32
Btbd19	1.19571583736025e-16	1.41966	0.144	0.052	2.9095353470487e-12
Tmem223	2.19915836660326e-56	1.41959	0.603	0.298	5.3512120534557e-52
Crip2	1.05843287568177e-106	1.41863	0.88	0.548	2.57548471639646e-102
Hmgn2	1.82638573028218e-78	1.41819	0.715	0.336	4.44414439749564e-74
Mid1ip1	1.98297731122857e-61	1.41738	0.584	0.255	4.82517869141248e-57
Pycrl	7.66032266110603e-36	1.41738	0.359	0.148	1.86398631312693e-31
Pwp2	4.57966861360804e-29	1.41714	0.25	0.091	1.11437076374924e-24
Pus7l	2.39538003306128e-25	1.41553	0.243	0.094	5.82867823444802e-21
Wdr43	7.83845327956053e-127	1.41357	0.935	0.619	1.90733083651546e-122
Cdk4	7.05099353390201e-101	1.4129	0.863	0.536	1.71571825660438e-96
Sema6a	1.48004507717244e-52	1.41282	0.651	0.341	3.6013936862837e-48
Dbt	8.30066108805883e-40	1.41221	0.427	0.187	2.01979986255735e-35
Rtl8a	5.36680142964082e-16	1.41193	0.144	0.053	1.3059037918745e-11
Dnajc12	2.75616071822911e-13	1.41083	0.142	0.059	6.70656587566689e-09
Gm15417	4.60088298310985e-08	1.41031	0.102	0.047	0.00111953
Eif4enif1	2.07818669468886e-97	1.41015	0.871	0.552	5.0568516841864e-93
Parva	7.32097223714367e-111	1.40999	0.935	0.663	1.78141217446417e-106
Gm42937	1.03893277996691e-22	1.40823	0.176	0.059	2.52803513349349e-18
Polr1e	3.54745441784617e-31	1.40787	0.292	0.113	8.63202083494509e-27
Pllp	1.65478036243154e-39	1.40673	0.398	0.17	4.02657705590466e-35
Ccdc88c	6.25154314026326e-100	1.4067	0.858	0.456	1.52118799232026e-95
Tspyl2	2.76479214876483e-18	1.40662	0.167	0.062	6.72756873558945e-14
Cep78	2.26077830671685e-20	1.40639	0.368	0.202	5.5011518537341e-16
Gm46563	2.61856374549852e-12	1.40585	0.121	0.047	6.37175116192156e-08
Mrm3	1.81584611069909e-17	1.40493	0.184	0.075	4.41849834116409e-13
Phyh	2.0394960005499e-42	1.40454	0.425	0.178	4.96270561813808e-38
Adgrg1	7.23995345085362e-41	1.40409	0.488	0.234	1.76169787319621e-36
Pusl1	2.68817799983409e-19	1.40399	0.197	0.08	6.5411435269963e-15
Arhgef26	1.41564975220106e-36	1.4036	0.387	0.161	3.44470054203084e-32
C1qbp	2.70376263422467e-101	1.40303	0.86	0.489	6.5790656178589e-97
Tfdp2	2.78165763930038e-52	1.4029	0.55	0.249	6.76860753370962e-48
Fam219b	2.97316917946417e-16	1.40248	0.169	0.068	7.23461256439015e-12
Cracr2b	1.70969421902038e-29	1.40233	0.349	0.158	4.16019894314229e-25
Dhodh	5.21441191129658e-26	1.40179	0.228	0.084	1.2688228503758e-21
Hsd11b1	3.35263585997715e-10	1.4016	0.089	0.033	8.15796883808241e-06
Osbpl6	2.18533980243466e-53	1.40069	0.59	0.268	5.31758734126425e-49
Kctd14	1.14224718428223e-45	1.39954	0.501	0.226	2.77943007351394e-41
Mettl1	2.37595614297897e-57	1.39854	0.562	0.249	5.78141408271072e-53
Pccb	2.71089022613001e-49	1.39834	0.503	0.221	6.59640918724215e-45
Gm31683	3.84627549661173e-10	1.3968	0.142	0.066	9.35914216590532e-06
Praf2	2.33630784891158e-13	1.39627	0.123	0.046	5.68493788875655e-09
Hnmt	2.82401950138322e-12	1.39533	0.176	0.084	6.87168665271578e-08
Rassf5	3.43144827431618e-08	1.39384	0.065	0.023	0.000834974
Zfp593	5.59997289478047e-34	1.39351	0.355	0.149	1.36264140448693e-29
Psip1	1.81949144415468e-82	1.39241	0.708	0.325	4.42736853106158e-78
Kazn	2.99603677175144e-77	1.39122	0.808	0.46	7.29025627670278e-73
Cks1b	1.71284164496171e-56	1.38981	0.414	0.14	4.16785757468534e-52
L2hgdh	1.10042880492321e-61	1.38967	0.645	0.319	2.67767341101964e-57
Prnp	1.69053389519066e-85	1.38865	0.848	0.535	4.11357612716742e-81
Ildr1	3.03592704702814e-46	1.38811	0.484	0.209	7.38732128353356e-42
Ermard	4.0839697503263e-23	1.38797	0.268	0.114	9.93752359346898e-19
Lifr	1.3171168679205e-95	1.38786	0.886	0.551	3.20494047471096e-91
Gm15270	2.54946668823442e-07	1.38762	0.066	0.025	0.00620362
Nin	5.4519149902747e-43	1.38757	0.495	0.233	1.32661447458354e-38
Pdk3	1.30163188508022e-31	1.38725	0.389	0.182	3.1672608659657e-27
Stra6	1.50270809153965e-18	1.38659	0.146	0.049	3.65653959914343e-14
Pctp	4.10722464264789e-36	1.38653	0.359	0.145	9.99410972295511e-32
Bcl7c	7.15923842488768e-51	1.38556	0.556	0.261	1.74205748592792e-46
Smim11	1.52977768871206e-43	1.38548	0.526	0.26	3.72240804994305e-39
Blvra	9.32743718348257e-29	1.3825	0.302	0.126	2.26964528985681e-24
S100a13	2.68312214352634e-18	1.37979	0.195	0.08	6.52884111184263e-14
Sdc4	8.7409733263995e-159	1.37941	0.977	0.819	2.12694103951279e-154
Rtca	3.10638286496613e-34	1.37788	0.336	0.135	7.55876142532208e-30
Echdc2	9.44648382505655e-32	1.37748	0.287	0.108	2.29861290915101e-27
Mtmr4	1.6178715040518e-24	1.37735	0.268	0.112	3.93676673080924e-20
Plcl1	5.70060853550631e-56	1.37666	0.535	0.219	1.38712907494475e-51
Nherf2	4.95274414605372e-48	1.37656	0.545	0.265	1.20515123305925e-43
Map9	8.52029535320445e-13	1.37543	0.083	0.025	2.07324346829524e-08
Entpd6	3.1143835026887e-43	1.37535	0.486	0.228	7.57822937709241e-39
Ssx2ip	3.04047280309372e-73	1.37476	0.81	0.485	7.39838247176795e-69
Fzd2	1.8689243252377e-28	1.37325	0.319	0.136	4.54765356060089e-24
B4galt4	1.26867993994615e-33	1.37238	0.33	0.131	3.08707889787097e-29
Eif2b3	1.1062262555034e-57	1.3716	0.6	0.276	2.69178034751644e-53
Glce	7.64600134726035e-33	1.37114	0.497	0.268	1.86050150782886e-28
Ccdc102a	2.95130085240294e-28	1.37021	0.328	0.142	7.18140036415208e-24
Zfp820	3.15353764309504e-11	1.36977	0.101	0.037	7.67350314694317e-07
Bloc1s1	1.53732594012234e-23	1.36906	0.279	0.122	3.74077521009968e-19
Fastkd1	1.88977562158961e-24	1.36865	0.228	0.086	4.59839102001399e-20
Cd79b	2.21315157531257e-07	1.36776	0.087	0.039	0.00538526
Hddc3	4.03431269682211e-22	1.36732	0.216	0.084	9.81669308517723e-18
Rpp40	2.21943434621407e-12	1.36714	0.176	0.084	5.4005495946427e-08
Slc25a32	4.4032697988165e-50	1.36647	0.558	0.269	1.07144764014602e-45
Nop10	8.92184470401319e-113	1.36643	0.903	0.538	2.17095247182753e-108
Lancl1	4.22485519882001e-21	1.36555	0.254	0.111	1.02803401552887e-16
Gart	1.22509790585124e-73	1.36461	0.723	0.366	2.98103073430783e-69
Repin1	5.72885665818411e-11	1.36404	0.118	0.048	1.39400269063594e-06
Fbxo22	5.08442322373538e-68	1.36309	0.679	0.347	1.23719270303153e-63
Ctps	4.4354786931557e-81	1.36274	0.696	0.296	1.07928503040558e-76
Tkt	6.63264324946461e-122	1.36212	0.922	0.656	1.61392108189222e-117
Pus7	3.96096457239722e-73	1.36166	0.658	0.291	9.63821509401415e-69
Katnal1	5.59313406560953e-10	1.36129	0.11	0.046	1.36097731218477e-05
Ahsa1	7.24668544056051e-68	1.36115	0.7	0.356	1.76333596825159e-63
Vmac	1.68183849648492e-31	1.36045	0.287	0.11	4.09241761349675e-27
Ccdc125	2.36913823393134e-38	1.3601	0.38	0.156	5.76482406462513e-34
Gm10131	1.29544229024597e-07	1.35881	0.072	0.029	0.0031522
Cmc4	1.96053434182808e-16	1.35821	0.167	0.066	4.77056821397028e-12
Smarca2	3.80912272555352e-74	1.35731	0.829	0.51	9.26873832808939e-70
Timm8a1	1.65683482788203e-46	1.35715	0.495	0.224	4.03157618668535e-42
Tpd52l1	3.40953069779757e-67	1.35697	0.789	0.473	8.29641104695083e-63
Nme1	3.1032861746687e-104	1.35651	0.875	0.443	7.55122624882135e-100
Pex10	5.22611314028062e-12	1.35497	0.146	0.064	1.27167011042448e-07
Kitl	4.84221411361237e-17	1.35477	0.161	0.06	1.1782559602653e-12
Rps4x	5.17106092423727e-192	1.3546	0.983	0.891	1.25827425469465e-187
D030028A08Rik	5.12031219728549e-27	1.35432	0.326	0.144	1.24592556696548e-22
Bmp2k	6.86201813899961e-26	1.35352	0.535	0.318	1.66973487376278e-21
Mrps26	3.01202763238966e-42	1.3535	0.51	0.248	7.32916683789377e-38
Klhl42	1.04186032763022e-23	1.35349	0.262	0.11	2.53515873522261e-19
Map2k3os	3.34733866600415e-07	1.35254	0.053	0.018	0.00814508
Mdn1	4.41203026457862e-108	1.35156	0.907	0.556	1.07357932427992e-103
Tm4sf1	5.71314074357554e-08	1.35135	0.059	0.02	0.00139018
Osgep	5.07069282166159e-43	1.35071	0.488	0.23	1.23385168429491e-38
Rpl36a	2.1847167788585e-161	1.35044	0.973	0.77	5.3160713379964e-157
Pomgnt1	1.27533835701514e-39	1.3491	0.438	0.193	3.10328082412494e-35
Lix1	5.63491070724726e-20	1.34851	0.214	0.089	1.37114282239448e-15
Thumpd1	5.01016052229131e-77	1.34669	0.759	0.409	1.21912235988915e-72
Gm35853	1.87987789220679e-09	1.34595	0.087	0.033	4.57430687510678e-05
Rpl39	1.34212886430045e-176	1.34467	0.973	0.826	3.26580216550228e-172
Ulk4	1.69909930641889e-22	1.34457	0.254	0.107	4.13441834230909e-18
Mcrip1	7.19935916893805e-57	1.34419	0.679	0.363	1.7518200665777e-52
2700038G22Rik	8.05739515912183e-15	1.34409	0.157	0.064	1.96060596406912e-10
5730522E02Rik	5.79033204564588e-54	1.34386	0.503	0.201	1.40896149666701e-49
Ercc8	2.50169613988186e-33	1.3438	0.334	0.133	6.08737721717453e-29
Laptm5	9.25851823878393e-48	1.3436	0.459	0.187	2.25287524304329e-43
Agpat5	9.33677567004989e-65	1.3403	0.715	0.388	2.27191762379324e-60
Rpl10a	1.02636073761821e-189	1.34028	0.983	0.882	2.49744358284639e-185
Fmo2	1.65812706006035e-18	1.34021	0.11	0.03	4.03472057524486e-14
Klf9	7.00452722590502e-29	1.33942	0.351	0.159	1.70441160987947e-24
Nckap5	1.0542488441835e-32	1.33903	0.381	0.169	2.56530371255172e-28
Shld2	2.46931941168597e-17	1.33801	0.218	0.097	6.00859492445546e-13
Polr2e	2.41438560260158e-66	1.33466	0.715	0.384	5.87492448681043e-62
Fut4	1.74175767630194e-10	1.33324	0.129	0.057	4.23821895374551e-06
Zbtb25	3.02004066523512e-12	1.33273	0.19	0.092	7.34866495071662e-08
Hs3st3b1	7.23118523930907e-36	1.33266	0.429	0.201	1.75956430428107e-31
Qtrt2	1.80601094675931e-48	1.33236	0.51	0.227	4.39456643674942e-44
Platr16	1.6041445349909e-09	1.33135	0.108	0.046	3.90336489699335e-05
Cyb5r1	1.56138116233416e-46	1.3301	0.472	0.206	3.79930878230771e-42
Pfn2	1.12133957915724e-09	1.3298	0.08	0.029	2.72855559796331e-05
Sdhaf4	1.02423457389677e-43	1.32909	0.49	0.229	2.49226998866302e-39
Pdss1	5.94222950354278e-38	1.32845	0.374	0.149	1.44592270509706e-33
Rps13	6.72263682697262e-176	1.3283	0.977	0.837	1.63581921910725e-171
Erh	2.92436103271627e-107	1.3275	0.898	0.566	7.11584770090851e-103
Slc35a1	1.19050670789326e-41	1.32741	0.472	0.214	2.89685997231668e-37
Faap20	7.30590924255101e-34	1.32715	0.374	0.164	1.77774689598994e-29
Trp53rkb	7.60862029301147e-17	1.32715	0.195	0.084	1.85140557589848e-12
Fntb	6.01165628008592e-41	1.32676	0.526	0.263	1.46281632263331e-36
Hacd3	1.24576963371308e-66	1.32578	0.765	0.444	3.03133124971403e-62
Macrod2	7.09991607811186e-17	1.32527	0.268	0.132	1.72762257928696e-12
Radx	2.02836135971511e-46	1.32485	0.598	0.3	4.93561169659477e-42
Prkar1b	8.87282995228859e-09	1.32483	0.072	0.026	0.000215903
Dach1	4.63958917035704e-120	1.32475	0.977	0.818	1.12895123282298e-115
Septin6	4.30343291091947e-29	1.32438	0.275	0.106	1.04715433021404e-24
Nr6a1os	2.63083975219661e-23	1.32369	0.277	0.123	6.40162236902001e-19
Exosc3	9.9024982934896e-53	1.32352	0.598	0.295	2.40957490975482e-48
Arl6	2.49965788425737e-12	1.32148	0.12	0.046	6.08241752976346e-08
Six4	6.58518189455006e-56	1.32071	0.586	0.278	1.60237231040087e-51
Grip1os3	1.30542111193717e-16	1.32058	0.188	0.078	3.17648119167672e-12
Rps21	6.7498427350902e-194	1.32049	0.979	0.866	1.6424392327295e-189
Stmn1	6.17976791345621e-52	1.31951	0.533	0.232	1.5037229263813e-47
Prob1	1.38604928511679e-23	1.31914	0.235	0.092	3.37267372547468e-19
Nop58	1.2650403256874e-125	1.31914	0.949	0.643	3.07822262449515e-121
Gata2	1.5814234548325e-79	1.31878	0.877	0.647	3.84807769264393e-75
Schip1	2.8866722724888e-78	1.31874	0.776	0.383	7.024139640647e-74
Cryl1	1.71668340980561e-72	1.3187	0.7	0.326	4.17720574107998e-68
Rps9	1.20336863574724e-186	1.31851	0.983	0.87	2.92815690136375e-182
Nudt16l1	8.13493209763617e-44	1.3172	0.455	0.201	1.97947302731781e-39
Nob1	2.92524489444202e-67	1.31676	0.723	0.37	7.11799840164578e-63
Dach2	1.1687574999529e-13	1.31603	0.137	0.053	2.8439376246354e-09
Gm11973	5.73985303328115e-14	1.31577	0.106	0.035	1.3966784385883e-09
Dut	2.01936903541832e-75	1.3152	0.467	0.141	4.9137306738834e-71
Hap1	2.25129693365523e-21	1.31474	0.125	0.034	5.47808082866327e-17
Znhit6	2.64149492134437e-73	1.31279	0.755	0.387	6.42754959210726e-69
Hdac11	3.81962373616986e-19	1.31085	0.207	0.084	9.29429043722213e-15
Cuedc2	2.9345829235649e-42	1.3105	0.486	0.226	7.14072062791046e-38
Nup93	2.01476750294814e-44	1.31013	0.554	0.267	4.9025337649237e-40
Elovl6	2.42013233501082e-46	1.30929	0.632	0.323	5.88890801078183e-42
Sptssa	1.03623190349302e-72	1.30899	0.753	0.411	2.52146309076957e-68
Ap3m2	1.54205907528207e-07	1.30897	0.089	0.039	0.00375229
Cers3	1.19817964564449e-11	1.3086	0.139	0.06	2.91553053174673e-07
Ftsj1	4.27016297904428e-21	1.30786	0.298	0.142	1.03905875769085e-16
Ilf2	2.7991983648035e-74	1.30755	0.751	0.389	6.81128938107636e-70
Aen	3.24146102166004e-41	1.30746	0.457	0.202	7.88744710400537e-37
Etfb	2.94346634219267e-91	1.30632	0.846	0.491	7.16233665045742e-87
Rpsa	8.20896956088974e-192	1.3055	0.992	0.916	1.9974885632513e-187
Rasd1	6.79864345066366e-96	1.30458	0.786	0.341	1.65431391084999e-91
Sf3b4	8.35649132766194e-49	1.30342	0.596	0.307	2.03338503475998e-44
Zdhhc3	1.07517449766301e-78	1.30333	0.844	0.547	2.61622210516341e-74
Kyat3	6.0068973427001e-10	1.30287	0.154	0.076	1.46165833039922e-05
Rps15a	2.09265119645732e-180	1.30115	0.979	0.876	5.0920481563396e-176
Ddx51	7.02525643919296e-24	1.30051	0.3	0.137	1.70945564934882e-19
Dnajc27	3.33110384507798e-09	1.30004	0.097	0.039	8.10557498622824e-05
Smyd2	8.65234034256113e-54	1.29951	0.526	0.225	2.1053739755554e-49
Srp14	1.21819231510563e-95	1.29919	0.875	0.552	2.96422736034653e-91
Ccnjl	1.69193060785667e-07	1.29893	0.07	0.027	0.00411697
Stx18	1.40419502099374e-73	1.2988	0.873	0.602	3.41682774458406e-69
Phb	3.36104822999224e-53	1.29869	0.609	0.292	8.17843865804012e-49
Gm14403	1.24991153779405e-08	1.29843	0.078	0.029	0.000304141
Pebp1	4.01831469768799e-125	1.29759	0.935	0.661	9.77776515388419e-121
Cklf	5.24144629918043e-31	1.29673	0.4	0.188	1.27540112797957e-26
Gm15446	1.57447018750303e-25	1.29636	0.26	0.104	3.83115830725111e-21
Slc25a4	1.20227311074737e-79	1.29628	0.801	0.421	2.92549116038157e-75
Arl16	7.06498446989481e-12	1.29603	0.139	0.059	1.7191226710595e-07
Ube2cbp	1.70739976735915e-14	1.29537	0.228	0.113	4.15461585391502e-10
Golt1a	2.67533968609591e-18	1.2952	0.214	0.092	6.50990405817717e-14
Mrps18a	1.40101095431713e-70	1.29381	0.759	0.423	3.40907995513988e-66
Cdr2	7.97152353156712e-09	1.29317	0.125	0.059	0.000193971
Zfp202	1.06090657178423e-18	1.29204	0.197	0.079	2.58150396112256e-14
Fdx2	1.79238921001724e-39	1.29098	0.461	0.217	4.36142066473495e-35
Shisa4	6.30978175220577e-16	1.29092	0.188	0.081	1.53535919376423e-11
Ybx1	2.57520073176055e-200	1.29092	0.996	0.939	6.26623594059294e-196
Vwa8	3.16562363489906e-75	1.29083	0.822	0.481	7.70291199079989e-71
Rpl15	2.16683220615431e-178	1.29056	0.979	0.86	5.27255280723529e-174
Cisd1	6.25953681898712e-58	1.28992	0.609	0.286	1.52313309416413e-53
Cers2	4.46108736008338e-44	1.28981	0.524	0.253	1.08551638732909e-39
Exosc7	1.77735660841233e-76	1.28931	0.759	0.396	4.32484183524971e-72
Prmt6	1.48777504696504e-12	1.28839	0.184	0.088	3.62020302178003e-08
Lsm14b	1.31062026433348e-35	1.28837	0.499	0.256	3.18913228920265e-31
Cd320	1.14426324651414e-29	1.28797	0.381	0.179	2.78433575774286e-25
Utp25	2.95341193584089e-35	1.28686	0.436	0.206	7.18653726348164e-31
Polr2g	6.35279835245652e-57	1.28665	0.643	0.331	1.54582642310324e-52
Prdx6	4.24057528827297e-100	1.28597	0.903	0.597	1.03185918489546e-95
Ruvbl1	6.96426886809762e-72	1.28546	0.77	0.432	1.69461554367419e-67
Tmem62	3.80974613977264e-09	1.28527	0.08	0.029	9.27025528190876e-05
Naa10	1.00466261586616e-54	1.28519	0.575	0.27	2.44464554318713e-50
Gemin8	6.81289418184313e-13	1.28425	0.171	0.078	1.65778154126789e-08
Chmp6	1.33145931068836e-25	1.28341	0.334	0.159	3.23983994069798e-21
Gm17106	9.93931920912166e-09	1.28331	0.101	0.043	0.000241853
Nt5c	7.58903374695705e-49	1.28255	0.615	0.331	1.84663958164706e-44
Ncl	2.45570131599561e-183	1.28234	0.987	0.896	5.97545801221212e-179
Imp3	2.99784226111388e-65	1.2822	0.723	0.398	7.29464957396841e-61
Pex11a	3.596302563084e-22	1.28149	0.264	0.116	8.75088302675229e-18
Pacsin3	1.88509268654563e-38	1.28081	0.454	0.213	4.58699603417148e-34
Hddc2	3.39089826638059e-79	1.28069	0.85	0.534	8.25107275158389e-75
Usp46	1.65072905409699e-59	1.28054	0.732	0.442	4.01671900733421e-55
Tpm1	7.6056640310036e-38	1.28027	0.882	0.767	1.85068622866411e-33
Aprt	3.08728383110846e-70	1.27771	0.753	0.404	7.51228774623622e-66
Cct6a	1.16996604207107e-124	1.27685	0.928	0.704	2.84687837017153e-120
Rps18	4.80772499571997e-179	1.27598	0.981	0.877	1.16986372320854e-174
Tmem120a	1.26552947856193e-30	1.27526	0.383	0.176	3.07941288018473e-26
Gm4117	1.06598126226566e-08	1.27371	0.057	0.018	0.000259385
Mrpl57	5.55949017456208e-63	1.27337	0.689	0.338	1.35279074417619e-58
Dancr	5.32891141242207e-25	1.27239	0.275	0.115	1.29668401398466e-20
Rgs2	3.87263902173752e-08	1.27179	0.051	0.016	0.000942329
Zcchc3	6.9470654983226e-09	1.27168	0.104	0.045	0.000169043
Rab26os	2.16293063779366e-08	1.27154	0.076	0.029	0.000526306
Arl14	4.01355371806189e-09	1.27114	0.112	0.049	9.76618026216e-05
Tsen2	2.65518278799779e-15	1.27063	0.218	0.103	6.46085627803502e-11
Gpn1	1.22622338461907e-33	1.27056	0.421	0.198	2.98376936179357e-29
Dbp	1.91963690215319e-21	1.27041	0.188	0.067	4.67105247400936e-17
Eef1akmt1	7.46638818962458e-41	1.27003	0.516	0.257	1.81679623818135e-36
Zfp623	7.47712768796222e-15	1.26895	0.121	0.042	1.81940948031185e-10
Camk1	7.09932066909679e-37	1.26846	0.389	0.164	1.72747769841132e-32
Adipor2	5.26234546256076e-65	1.26807	0.871	0.672	1.28048652140491e-60
Slc19a1	9.13738301358282e-16	1.26693	0.186	0.08	2.22339940869511e-11
Lcp1	3.46410099510354e-51	1.26569	0.55	0.244	8.42919695138543e-47
Idh3a	2.33147393367076e-55	1.26562	0.649	0.341	5.67317552280107e-51
Lyar	1.06151561924631e-56	1.26473	0.676	0.352	2.58298595631206e-52
Rps10	1.33674867127366e-186	1.26411	0.983	0.894	3.25271054181019e-182
Rcbtb2	3.34402005487688e-53	1.26269	0.613	0.304	8.13700399953192e-49
Cd59b	1.0104445155763e-12	1.26231	0.116	0.043	2.4587146397518e-08
Bsn	1.12555251670053e-26	1.26183	0.281	0.115	2.73880693888739e-22
Poglut2	3.5783735139408e-24	1.26171	0.279	0.119	8.70725627147216e-20
Mrpl4	1.80962337025076e-32	1.26135	0.448	0.228	4.40335654683116e-28
Ssna1	4.6260219198508e-38	1.25923	0.49	0.242	1.12564991375729e-33
Nqo1	4.97592534012104e-08	1.25874	0.093	0.04	0.00121079
Smim27	1.21860945758581e-14	1.25817	0.156	0.063	2.96524239314355e-10
Wfdc2	4.93317791595421e-189	1.2573	0.987	0.921	1.20039018228914e-184
Comtd1	2.61184581154647e-24	1.25718	0.306	0.14	6.35540441323602e-20
Scoc	6.0296831851907e-31	1.25676	0.378	0.172	1.46720280945245e-26
Jagn1	2.40441842120484e-52	1.25576	0.615	0.306	5.85067134431773e-48
Vps28	1.63066610331133e-78	1.25533	0.843	0.533	3.96789982918745e-74
Ltv1	1.44017112356064e-32	1.25517	0.455	0.231	3.50436839496011e-28
Cachd1	6.42685521579338e-66	1.25388	0.704	0.332	1.563846679659e-61
Cptp	1.13750323358007e-07	1.25374	0.133	0.069	0.00276789
Cd63	2.95554128056383e-105	1.25366	0.918	0.672	7.19171859799596e-101
Hif1a	2.665665486932e-108	1.25354	0.956	0.778	6.48636382935164e-104
Rnf7	2.58558598745571e-96	1.25351	0.882	0.57	6.29150638327598e-92
Polr2l	9.37717767891709e-37	1.25259	0.484	0.245	2.2817486446109e-32
Wdr12	4.32050801907677e-57	1.25215	0.641	0.315	1.05130921628195e-52
Snrpf	4.47398516371594e-92	1.25214	0.888	0.553	1.088654809887e-87
Sdad1	1.10231162810213e-65	1.25208	0.748	0.398	2.68225488466091e-61
Slc22a17	3.76266415111479e-09	1.25192	0.089	0.035	9.15569067890761e-05
Glul	1.06873400022471e-72	1.25166	0.769	0.421	2.60055044274679e-68
Pkig	7.44248467847663e-36	1.2512	0.436	0.203	1.81097979681372e-31
Paqr3	9.99127809518972e-12	1.24956	0.123	0.05	2.43117769890252e-07
Eif1b	1.86657795530457e-59	1.24884	0.702	0.381	4.54194413864261e-55
Abhd12	2.00437785098396e-46	1.2488	0.545	0.265	4.87725262479927e-42
Dclre1b	1.39980369522945e-18	1.24852	0.239	0.107	3.40614233160182e-14
Slc16a6	3.52307482816155e-66	1.24796	0.81	0.487	8.57269797936549e-62
Rad51b	2.35135750753342e-44	1.24736	0.419	0.163	5.72155822308106e-40
Gm57402	2.18373696932758e-12	1.24724	0.14	0.059	5.31368716746479e-08
Thra	6.23318295928435e-56	1.2471	0.598	0.28	1.51672040948266e-51
Atl1	2.02475937924242e-20	1.24597	0.176	0.063	4.92684699751058e-16
Tnpo1	1.50578373593616e-115	1.2451	0.975	0.861	3.66402356465345e-111
Ipo13	1.46206020176501e-18	1.24453	0.226	0.099	3.5576310889548e-14
Guk1	2.21087152470234e-40	1.24425	0.503	0.24	5.37971368105821e-36
Tcte2	3.80037476314276e-23	1.2432	0.3	0.137	9.24745191115528e-19
Slc18b1	9.39602593195664e-13	1.24264	0.14	0.058	2.28633499002301e-08
Wdr55	1.274534262585e-20	1.24261	0.222	0.091	3.10132422114809e-16
Lrrc58	2.42558440736973e-116	1.24255	0.93	0.705	5.90217453845275e-112
Zfp961	4.31658272771398e-31	1.24165	0.402	0.191	1.05035407513464e-26
Rplp1	9.74567468610923e-187	1.24126	0.983	0.923	2.37141502137096e-182
Hsp90ab1	1.11693093923863e-201	1.24097	0.992	0.953	2.71782805444936e-197
Hilpda	1.93290349782758e-18	1.23961	0.216	0.093	4.70333408126384e-14
Rps7	2.178778862421e-190	1.23846	0.981	0.906	5.30162260592903e-186
Gm12592	1.61475363289546e-11	1.23831	0.142	0.063	3.92918001492453e-07
Nenf	4.82995365179385e-51	1.23804	0.583	0.28	1.175272622091e-46
Rpl17	2.95136000909906e-196	1.23676	0.981	0.919	7.18154431014073e-192
Fam136a	8.57814492300847e-58	1.2359	0.696	0.376	2.08732000411565e-53
Gm36220	3.04890355621276e-07	1.23523	0.063	0.023	0.0074189
Phf2os1	3.06045766124113e-07	1.23483	0.066	0.025	0.00744701
Nr2c2ap	1.09870435446943e-32	1.23482	0.402	0.188	2.67347730573047e-28
Sco2	2.44885710847297e-14	1.23444	0.218	0.109	5.95880400204727e-10
Lsm5	8.87099041301619e-56	1.23394	0.583	0.26	2.15857809719923e-51
Dtd2	1.00984356879043e-25	1.23383	0.357	0.174	2.45725235593776e-21
Pop5	1.09200683357736e-35	1.23353	0.4	0.178	2.65718022814378e-31
Rtl5	2.30650639545707e-08	1.23347	0.11	0.05	0.000561242
Arl2	2.82468271098942e-18	1.23329	0.288	0.147	6.87330044065054e-14
Golim4	1.84933889336068e-30	1.23314	0.436	0.218	4.49999632921455e-26
Noa1	3.39043783178775e-25	1.23287	0.368	0.182	8.24995237608913e-21
Phb2	2.98781140511238e-79	1.2324	0.833	0.508	7.27024149205996e-75
Mybbp1a	1.29421838933508e-91	1.23207	0.894	0.577	3.14922160676906e-87
Rps26	1.75500088189618e-191	1.23175	0.987	0.915	4.27044364591798e-187
Nbdy	5.48382604369251e-52	1.2303	0.596	0.291	1.3343793912117e-47
Sned1	2.58335127106479e-46	1.23022	0.579	0.285	6.28606864788195e-42
Fam185a	1.51772775579157e-67	1.22992	0.789	0.447	3.69308694816763e-63
Limch1	2.84361558602017e-19	1.2298	0.197	0.076	6.91936980546289e-15
Tspan9	1.56459979204368e-24	1.22916	0.317	0.145	3.8071406739799e-20
Cnbp	2.91406116029694e-131	1.22914	0.937	0.725	7.09078502135054e-127
Unc13d	1.80986458852782e-14	1.22864	0.12	0.042	4.40394350326474e-10
Rps5	4.15868792204246e-188	1.22833	0.981	0.886	1.01193353207059e-183
Zfp74	5.40944148446435e-12	1.22731	0.131	0.054	1.31627939641471e-07
Haus1	4.29227841639015e-13	1.22709	0.176	0.081	1.04444010706021e-08
Dcaf4	2.25335487432539e-18	1.22647	0.199	0.082	5.48308841569598e-14
Tle5	1.66798708476134e-89	1.22604	0.879	0.609	4.05871297334978e-85
Tmem198b	6.06366234722767e-09	1.22565	0.11	0.049	0.000147547
Chchd4	4.87858985722085e-43	1.22453	0.56	0.29	1.18710726995755e-38
Trmt5	7.77652386269152e-15	1.22407	0.205	0.095	1.89226155150873e-10
Mrpl40	1.57888817461691e-41	1.22301	0.505	0.246	3.84190859529532e-37
Ccdc115	1.2485925867623e-28	1.22283	0.393	0.191	3.03820034136871e-24
Ppcs	5.84274582245933e-31	1.22275	0.395	0.188	1.42171534097903e-26
Gm26901	1.31799275507931e-43	1.22273	0.649	0.361	3.20707177093448e-39
Ebna1bp2	3.70287649182104e-78	1.22264	0.822	0.489	9.01020936754814e-74
Emp2	1.45822585157072e-81	1.22188	0.894	0.634	3.54830096462702e-77
Prr5	6.73277471414732e-10	1.22178	0.131	0.06	1.63828607119347e-05
Pno1	1.81368745024279e-57	1.22116	0.651	0.33	4.41324567267579e-53
Trmt9b	8.20247810497272e-17	1.22042	0.194	0.082	1.99590899728301e-12
Prr15	9.97188190331487e-31	1.2198	0.357	0.158	2.42645802353361e-26
Xxylt1	1.17691495022924e-36	1.21904	0.421	0.188	2.86378714839281e-32
Pqlc3	2.47422614220839e-22	1.21825	0.161	0.051	6.02053447183569e-18
Sytl5	1.43256751666475e-13	1.21801	0.203	0.097	3.48586653830035e-09
Slc25a16	5.46622562004011e-30	1.21778	0.391	0.189	1.33009668012436e-25
E130311K13Rik	3.32260429320565e-08	1.217	0.091	0.039	0.000808489
Slc25a39	3.83678815873917e-69	1.21684	0.774	0.445	9.33605662666003e-65
Mvb12b	1.3487952546679e-27	1.21469	0.317	0.136	3.2820234931834e-23
Mtx3	5.24707718910005e-18	1.21419	0.252	0.118	1.27677129242371e-13
Dnmt3b	4.18271339566066e-22	1.21355	0.25	0.105	1.01777965056611e-17
Slc10a3	7.09708532152993e-08	1.21309	0.156	0.085	0.00172693
Pa2g4	1.81278482148824e-105	1.21291	0.915	0.634	4.41104930612734e-101
Zfp947	2.76255598528912e-09	1.21243	0.129	0.06	6.72212747900401e-05
Med30	1.11480270035402e-39	1.21189	0.497	0.24	2.71264941077144e-35
Tob2	7.01951678640001e-62	1.21134	0.731	0.422	1.70805901963472e-57
Kctd1	3.20267543717207e-139	1.21085	0.989	0.895	7.7930701412708e-135
Galnt17	8.24452200529277e-76	1.21066	0.852	0.496	2.00613953954789e-71
Dis3	2.62402940653248e-42	1.21055	0.55	0.275	6.38505075491549e-38
Zfas1	1.14550558801435e-48	1.21017	0.643	0.369	2.78735874731533e-44
Nf2	1.51550647231574e-63	1.20978	0.829	0.537	3.68768189908589e-59
Fggy	3.08158110097237e-22	1.20916	0.271	0.117	7.49841129299606e-18
Mpg	1.63702875392082e-16	1.20848	0.233	0.111	3.98338206691554e-12
Yif1b	1.56958707456732e-13	1.20542	0.262	0.143	3.81927622854466e-09
Cd59a	1.99556998098293e-29	1.20539	0.359	0.161	4.85582043472577e-25
Atp5md	1.23183028543496e-84	1.20468	0.879	0.576	2.9974126335489e-80
Znhit2	4.63487504375763e-10	1.20437	0.194	0.106	1.12780414439754e-05
Cct5	1.19602804624339e-106	1.20433	0.918	0.676	2.91029504492405e-102
Tmem125	3.82058932154687e-08	1.20425	0.114	0.054	0.000929664
Tfam	1.44979890568628e-38	1.2041	0.575	0.319	3.52779567720642e-34
1110065P20Rik	3.27724247534945e-22	1.20166	0.273	0.123	7.97451411526782e-18
Msantd3	1.42562752880573e-17	1.20148	0.252	0.119	3.46897946584299e-13
Naxd	3.15509423533851e-79	1.20141	0.867	0.597	7.67729080284921e-75
Gemin5	3.87633386271534e-47	1.20039	0.634	0.332	9.43228318814525e-43
Gnpnat1	5.76923293431978e-36	1.20038	0.465	0.226	1.40382744990803e-31
Fzd10	5.248941633889e-28	1.20029	0.423	0.218	1.27722496777421e-23
Grcc10	8.27951353770924e-73	1.19962	0.827	0.511	2.01465402913079e-68
Rpf2	1.39107898376308e-41	1.19946	0.55	0.282	3.38491249119071e-37
Oaz1	3.5040078510642e-133	1.19943	0.96	0.761	8.52630230399452e-129
Tada2a	5.68735591627021e-48	1.19857	0.62	0.335	1.38390431510603e-43
Cpeb1	3.9998121814696e-20	1.19668	0.268	0.122	9.73274298116999e-16
Rpl7a	1.2474941770253e-165	1.19644	0.981	0.848	3.03552758095566e-161
Nbea	2.21726596746656e-180	1.19609	0.996	0.94	5.39527327863638e-176
Pelo	8.30933088860653e-20	1.19607	0.258	0.118	2.02190948512463e-15
Il17re	6.32194167261164e-65	1.19522	0.776	0.452	1.53831806719659e-60
Exosc1	9.06314212027375e-46	1.19304	0.643	0.349	2.20533437212621e-41
Slc25a11	5.88975144033163e-41	1.19293	0.624	0.364	1.4331532179759e-36
Itgb5	1.47784826567646e-63	1.19263	0.786	0.474	3.59604818487052e-59
Snu13	1.33891606306863e-88	1.19198	0.871	0.575	3.25798445626491e-84
Rps2	7.15949931720582e-163	1.1911	0.985	0.898	1.74212096885569e-158
Pop1	3.37982102664413e-32	1.19097	0.366	0.157	8.22411850413316e-28
Gm14207	1.79835811159965e-11	1.19082	0.188	0.095	4.37594479295544e-07
Rps8	6.3075411535656e-184	1.18957	0.991	0.946	1.53481398889712e-179
Sdc2	6.86845165839096e-47	1.18921	0.594	0.301	1.67130034203627e-42
Pdcd2	9.76560852756422e-29	1.1886	0.402	0.199	2.3762655230122e-24
Park7	2.65524838901688e-83	1.18858	0.871	0.57	6.46101590499477e-79
Mettl18	7.08789171198272e-10	1.18836	0.093	0.036	1.72469669027676e-05
Wdr74	5.48859101425206e-32	1.18739	0.45	0.225	1.33553885149795e-27
Setx	2.41526540715153e-96	1.18648	0.96	0.743	5.87706531522181e-92
Nudcd2	1.83540257855852e-56	1.18639	0.66	0.336	4.46608509440645e-52
Mycl	2.43709020383829e-29	1.18623	0.387	0.181	5.93017159299972e-25
Rmdn2	8.72690854065272e-11	1.1856	0.135	0.059	2.12351865519703e-06
Elac2	1.42149520991833e-20	1.18553	0.292	0.141	3.45892429429427e-16
Pik3r1	1.29585433108349e-88	1.18485	0.918	0.657	3.15320234382545e-84
Ecsit	5.47839092918071e-16	1.18463	0.201	0.091	1.33305686479754e-11
Lsm7	1.24598773833598e-83	1.18462	0.858	0.523	3.03186196369294e-79
S100g	1.11825101889656e-41	1.18455	0.664	0.393	2.721040204281e-37
Stip1	2.80258759713218e-81	1.18159	0.85	0.517	6.81953640010172e-77
Rnaseh2b	1.52332311927354e-33	1.17964	0.444	0.216	3.70670214612831e-29
Orai3	6.28060740802134e-13	1.17933	0.211	0.106	1.52826020059383e-08
Aldh2	5.18337950632892e-56	1.17909	0.685	0.379	1.26127173527502e-51
Prps1l3	1.37943637444175e-27	1.17898	0.404	0.204	3.35658252992912e-23
BC029722	2.62682324665703e-16	1.17861	0.194	0.083	6.39184900609056e-12
Nudt4	1.45150765345946e-65	1.17805	0.871	0.655	3.53195357316291e-61
Dph7	3.02922469073694e-15	1.17795	0.199	0.091	7.37101243997021e-11
Tmem70	1.10310040610799e-33	1.17741	0.514	0.276	2.68417421818258e-29
Cars2	3.00752359162869e-38	1.17689	0.529	0.273	7.31820715551008e-34
Imp4	5.31527515774854e-29	1.17664	0.467	0.253	1.29336590413495e-24
Dcbld1	3.19557741372498e-15	1.1764	0.205	0.093	7.775798520817e-11
Rpl30	8.41039290577636e-163	1.17629	0.983	0.858	2.04650090576256e-158
Usp36	4.38879699348195e-39	1.17626	0.558	0.291	1.06792597242396e-34
Dpm3	3.29654477375278e-47	1.17595	0.634	0.337	8.02148239797264e-43
Rpl8	2.11932321326671e-149	1.17533	0.973	0.858	5.15694917484188e-145
Pold2	1.04407770702806e-17	1.17493	0.22	0.098	2.54055428451139e-13
Dnah8	3.31367033591275e-12	1.17469	0.038	0.006	8.06315402837648e-08
Timm17b	2.53899173104032e-36	1.17378	0.461	0.22	6.1781285791404e-32
Rps27a	1.38416292130226e-177	1.17267	0.981	0.897	3.36808363640478e-173
Lsm2	1.09769755168531e-51	1.17249	0.609	0.303	2.67102745251586e-47
Ifi30	7.44181794681796e-38	1.17246	0.499	0.252	1.81081756099921e-33
Rrs1	1.12345813108298e-71	1.17244	0.829	0.489	2.73371067036423e-67
Mak16	1.15124960742614e-58	1.17163	0.732	0.417	2.80133566975002e-54
Cul9	7.15570902481009e-27	1.17098	0.228	0.08	1.74119867700704e-22
Ss18l2	5.10179285034553e-19	1.16976	0.239	0.108	1.24141925427458e-14
Rpl21	7.78382107561549e-191	1.16956	0.979	0.908	1.89403718232952e-186
Polr2d	2.68012342113505e-37	1.16945	0.55	0.299	6.52154432064791e-33
Ndufb8	7.22332167667616e-66	1.16933	0.82	0.52	1.75765086358561e-61
Tmem251	2.5246879563777e-14	1.16929	0.249	0.132	6.14332320425386e-10
Ahsa2	1.90090884447646e-38	1.16854	0.505	0.258	4.62548149126457e-34
Czib	6.93057552774746e-31	1.16842	0.41	0.197	1.68641694316679e-26
Ftsj3	7.13240934166929e-55	1.16816	0.7	0.394	1.73552916510839e-50
Lsm1	4.46168625696755e-39	1.16814	0.596	0.33	1.08566211690791e-34
Msto1	4.74300781765866e-23	1.16794	0.275	0.119	1.15411609227088e-18
Mtln	1.28019423464898e-35	1.16774	0.524	0.277	3.11509663117136e-31
Slc25a5	9.38459898687752e-98	1.16768	0.935	0.656	2.28355447147691e-93
Rps25	1.80617400175317e-155	1.16721	0.975	0.83	4.39496319846598e-151
Nhp2	1.14004285052004e-71	1.16662	0.789	0.433	2.77406626817042e-67
Nup210	4.17555801105863e-22	1.16388	0.273	0.121	1.0160385308309e-17
Zfp704	1.61465319733754e-145	1.1637	0.989	0.914	3.92893562508144e-141
Rpl11	6.1548138601592e-179	1.16335	0.987	0.905	1.49765085659254e-174
Sox13	3.37110309699826e-68	1.16269	0.854	0.574	8.20290516592588e-64
Nol9	1.99599447245155e-57	1.16255	0.643	0.311	4.85685334981637e-53
Psmd6	1.40738799025152e-52	1.16245	0.706	0.41	3.42459719667902e-48
Cenpv	1.3791770624592e-43	1.16241	0.573	0.284	3.35595154608197e-39
Mfsd8	2.87257096610843e-12	1.16228	0.148	0.063	6.98982693183163e-08
Etfrf1	9.25377667932578e-30	1.16153	0.361	0.162	2.25172147938034e-25
Snrpg	1.19998087347869e-101	1.1614	0.928	0.63	2.91991345943569e-97
Gm20707	7.31171923480912e-10	1.16115	0.104	0.043	1.7791606414061e-05
Rps27	3.80276761482089e-160	1.16115	0.973	0.857	9.25327443714368e-156
Rin1	3.46403356521738e-19	1.16066	0.197	0.078	8.42903287424346e-15
Mrps14	1.17547617397663e-59	1.16062	0.763	0.463	2.86028617413733e-55
E2f3	5.57068310659228e-66	1.16002	0.774	0.407	1.3555143203271e-61
Gm11944	6.73174866302649e-41	1.15984	0.543	0.271	1.63803640217424e-36
Adsl	7.48392557412205e-36	1.15969	0.51	0.265	1.82106360995112e-31
Zfp566	1.23461057138078e-13	1.15949	0.18	0.081	3.00417790334085e-09
Snhg14	1.27672153832773e-09	1.15936	0.118	0.051	3.10664651921286e-05
Cbr1	1.4101289692586e-37	1.15927	0.514	0.266	3.43126682089696e-33
Nrtn	1.24059141617665e-33	1.15909	0.433	0.201	3.01873109298263e-29
Porcn	1.19571665227687e-40	1.15909	0.598	0.346	2.9095373299853e-36
Trmt61b	3.48854972856995e-28	1.15888	0.435	0.222	8.48868805452926e-24
Pitpnm3	1.1203625430457e-36	1.15886	0.355	0.134	2.7261781759931e-32
Fndc4	1.32277646335731e-12	1.15872	0.087	0.027	3.21871196828735e-08
Hebp1	1.64945496122046e-40	1.15844	0.541	0.274	4.01361875713775e-36
Pim3	1.22199906446888e-20	1.15808	0.332	0.171	2.97349032357212e-16
Zmynd19	1.90103391875092e-33	1.15773	0.471	0.236	4.62578583449662e-29
Nle1	1.12845651026791e-20	1.15717	0.302	0.145	2.7458732264349e-16
Patz1	5.56863804601439e-62	1.15679	0.685	0.337	1.35501669573668e-57
Trdmt1	4.55412969212003e-09	1.15672	0.085	0.033	0.000110816
Fbxo21	5.25007522414655e-28	1.15648	0.304	0.127	1.27750080429158e-23
Acaa2	1.87453014377435e-23	1.15611	0.273	0.117	4.56129419884612e-19
Wdr59	5.04193725950502e-44	1.15583	0.696	0.42	1.22685459335536e-39
3110082I17Rik	4.19531028777968e-53	1.15558	0.639	0.315	1.02084485232543e-48
Tsr1	3.33328358002652e-55	1.15496	0.698	0.38	8.11087893527852e-51
Npm1	2.03147625473899e-160	1.15323	0.985	0.87	4.94319117065639e-156
Zdhhc23	3.04859989909466e-16	1.15298	0.231	0.108	7.41815813446703e-12
Eif3m	3.76251305330061e-96	1.15089	0.905	0.641	9.15532301259637e-92
Trmt10c	3.76367046413004e-36	1.15002	0.535	0.288	9.15813934036764e-32
Mycbp	1.03102142509193e-30	1.14918	0.44	0.223	2.5087844336762e-26
Rcn2	8.8111141078249e-33	1.14918	0.454	0.226	2.14400839585703e-28
Prkacb	5.00460557250651e-31	1.1489	0.467	0.24	1.21777067395801e-26
Mllt6	3.49006651443888e-42	1.14748	0.545	0.27	8.49237884958413e-38
Snrpd3	4.63195000348936e-88	1.14695	0.892	0.596	1.12709239434907e-83
Acy1	4.9409986187385e-10	1.1466	0.135	0.062	1.20229319389764e-05
Ttbk2	2.52258628464302e-33	1.14641	0.328	0.128	6.13820920642187e-29
Tomm40	1.23650908220384e-54	1.14622	0.685	0.366	3.00879754972661e-50
Endog	1.24589130761825e-17	1.14578	0.266	0.132	3.0316273188275e-13
Tomm20	6.59813731254387e-88	1.14506	0.879	0.608	1.6055247522613e-83
Ntpcr	1.39164513608737e-12	1.14487	0.195	0.097	3.3862901096414e-08
Calml4	1.04053552501597e-09	1.14481	0.192	0.105	2.53193509302136e-05
Ganc	1.27389340410028e-22	1.1444	0.364	0.191	3.0997648201972e-18
Rpl14	5.31094880810105e-174	1.14421	0.985	0.907	1.29231317347523e-169
Zfp322a	5.60249254629826e-45	1.144	0.581	0.295	1.36325451129076e-40
Fbxo25	9.9060026491914e-20	1.14352	0.319	0.163	2.41042762462774e-15
Eef1a1	1.38380048743414e-214	1.14268	0.992	0.968	3.3672017260735e-210
Fam53a	2.14371135156134e-36	1.14253	0.478	0.233	5.2162928317542e-32
Hypk	4.04434404256309e-49	1.14219	0.664	0.367	9.84110235876876e-45
Dus1l	6.5985459804806e-33	1.142	0.497	0.266	1.60562419343034e-28
Acat1	2.16105308578468e-57	1.14118	0.708	0.373	5.25849047363985e-53
Ptpn1	3.68264596816003e-59	1.14083	0.782	0.481	8.96098243432381e-55
Slc16a13	4.02001423388684e-10	1.14012	0.104	0.042	9.78190063531686e-06
Bccip	4.55687808872799e-47	1.14	0.63	0.332	1.10882514533018e-42
Ube2q2	2.60589093646671e-65	1.13936	0.848	0.586	6.34091441570444e-61
Hnrnpa1	3.4310844140717e-110	1.13918	0.949	0.739	8.34885770476066e-106
Snhg5	9.70812401735341e-33	1.13911	0.389	0.177	2.36227781714261e-28
Psmg3	1.63384880353257e-26	1.13902	0.38	0.187	3.97564429363581e-22
Mtfr1l	1.01299776667155e-38	1.13854	0.509	0.254	2.46492746564189e-34
Dnaaf2	2.24064642648955e-11	1.13816	0.201	0.104	5.45216494957702e-07
Nop2	6.35385827082179e-33	1.13802	0.491	0.257	1.54608433303907e-28
Eef1e1	3.25081935837578e-56	1.1377	0.687	0.359	7.91021874473578e-52
Snrpe	4.62407380037693e-105	1.13693	0.924	0.649	1.12517587784572e-100
Dctpp1	1.66942044045237e-33	1.13685	0.457	0.23	4.06220075775274e-29
4933439K11Rik	2.31604448766238e-07	1.13681	0.078	0.032	0.00563563
Nsun5	2.75642310509809e-11	1.13646	0.199	0.105	6.70720434163519e-07
Eva1c	3.87428508758745e-47	1.1358	0.715	0.43	9.42729790362653e-43
9030025P20Rik	1.63962486906815e-07	1.1356	0.101	0.046	0.0039897
Vegfb	1.89968425148539e-20	1.13513	0.29	0.138	4.6225016891394e-16
Cdk2ap1	1.89284873224753e-30	1.13493	0.474	0.253	4.60586882017793e-26
Rad1	3.25784001610947e-08	1.13465	0.169	0.094	0.00079273
Cirbp	8.15267203972357e-40	1.13462	0.552	0.292	1.98378968742594e-35
Snrpc	1.32992846379558e-51	1.13426	0.689	0.383	3.23611493095377e-47
Smim26	1.30596165452519e-13	1.1341	0.271	0.151	3.17779649395614e-09
Polr1b	1.1257099664945e-37	1.13371	0.469	0.218	2.73919006147107e-33
Ndufb11	3.31075961249293e-78	1.13348	0.86	0.541	8.05607136507905e-74
Nop56	2.43587568788765e-86	1.13252	0.903	0.575	5.92721631133703e-82
Ran	4.11566030918494e-109	1.13231	0.943	0.678	1.00146362303397e-104
Tyms	2.42077986139367e-37	1.13187	0.395	0.164	5.89048363672923e-33
Tomm5	2.10611971799833e-64	1.13142	0.787	0.461	5.12482110980534e-60
Dpy19l3	6.01248428481756e-31	1.13104	0.397	0.181	1.46301780102466e-26
Sgf29	1.03531331686441e-20	1.13027	0.298	0.144	2.51922789392618e-16
Usp11	3.13082694377279e-09	1.13024	0.139	0.067	7.61824120228234e-05
Ppia	1.34256989888172e-137	1.12942	0.977	0.843	3.2668753349489e-133
Rpl23	2.4193113090932e-190	1.12932	0.992	0.929	5.88691020841649e-186
Stard7	2.19269073631358e-50	1.12802	0.55	0.246	5.33547436867183e-46
Rpl32	7.65386333448733e-184	1.12762	0.989	0.921	1.8624145651808e-179
Prcp	2.8968332734214e-37	1.12727	0.556	0.302	7.04886440421629e-33
Zfp629	8.65492627740969e-32	1.12726	0.433	0.212	2.1060032110821e-27
Rraga	1.10603642023306e-45	1.12704	0.645	0.368	2.69131842135311e-41
Mcm4	8.86519822765449e-35	1.12583	0.421	0.189	2.15716868473517e-30
Tbpl1	1.2247212103536e-36	1.12578	0.535	0.284	2.98011412115341e-32
Lrrcc1	2.22783208074496e-40	1.12574	0.647	0.381	5.42098380207671e-36
Urb1	1.37914888237275e-31	1.12451	0.41	0.193	3.35588297547762e-27
Zfp618	7.82766397918891e-48	1.12414	0.662	0.364	1.90470547605604e-43
Dph2	1.20193001873269e-08	1.12391	0.102	0.044	0.000292466
Ppid	2.9603908985975e-68	1.12323	0.831	0.529	7.20351917355729e-64
Dpy30	9.29948866159457e-59	1.12302	0.731	0.408	2.26284457602581e-54
Znrd2	1.52413987305999e-28	1.12278	0.404	0.203	3.70868955311688e-24
Mtrfr	1.27707351704548e-14	1.12183	0.216	0.104	3.10750298902676e-10
Mecr	1.26632656962233e-33	1.12173	0.495	0.253	3.08135244186202e-29
2900005J15Rik	2.21499204224303e-22	1.12132	0.213	0.081	5.38974013638996e-18
Rtraf	2.34474859021102e-76	1.12094	0.858	0.582	5.70547674456047e-72
Surf6	4.4841185999412e-27	1.12033	0.421	0.221	1.09112057892369e-22
Gm10130	1.14087296204651e-19	1.1201	0.273	0.129	2.77608617854778e-15
Pin1	5.69896134316709e-37	1.11977	0.545	0.291	1.38672826363285e-32
Tspan4	1.95052622412361e-08	1.1196	0.101	0.045	0.000474622
Zfp97	6.19509404133631e-13	1.11948	0.159	0.069	1.50745223307836e-08
Triap1	1.49022142844254e-31	1.11881	0.435	0.219	3.62615580182924e-27
Stxbp4	3.77162402533395e-24	1.11788	0.226	0.084	9.1774927408451e-20
Nxn	6.46391142867872e-63	1.11785	0.879	0.617	1.57286356794039e-58
Nt5dc3	5.68148821083283e-79	1.11769	0.905	0.662	1.38247652634195e-74
Mphosph10	3.86171894743738e-49	1.1175	0.66	0.359	9.39672071479938e-45
Tmem126a	4.00697505950766e-28	1.11729	0.446	0.238	9.75017241229999e-24
Pecr	4.09206816314874e-16	1.11729	0.205	0.091	9.95722946138984e-12
Trnau1ap	6.51928065271191e-36	1.11552	0.516	0.269	1.58633656122439e-31
Usp39	6.47291476373867e-28	1.11551	0.459	0.247	1.57505434946053e-23
Prr3	1.13721191195953e-29	1.11481	0.288	0.11	2.76717774537113e-25
Slc1a1	4.03740852622658e-64	1.11454	0.867	0.604	9.82422616686714e-60
Tmx2	1.01884228989936e-23	1.114	0.368	0.189	2.47914894401212e-19
Strap	8.28488435413786e-59	1.11359	0.795	0.514	2.01596090989237e-54
Nup43	2.88093659886075e-14	1.11358	0.249	0.127	7.01018302600786e-10
Zfp472	1.21422966116165e-20	1.11236	0.324	0.163	2.95458503450465e-16
Set	1.03424721110936e-149	1.11178	0.975	0.87	2.51663373879239e-145
Mid1	6.21754547749642e-76	1.1116	0.964	0.786	1.5129153410392e-71
Hint1	1.69718447379911e-84	1.1112	0.905	0.584	4.12975898009537e-80
Naaa	8.74644703705537e-55	1.11101	0.645	0.308	2.12827295752668e-50
Hdac1	2.65476426887727e-76	1.11099	0.865	0.585	6.45983789545907e-72
Suco	8.23160953710397e-66	1.1096	0.915	0.731	2.00299754866351e-61
Cxcl14	2.24352211624699e-10	1.10935	0.201	0.11	5.4591623654638e-06
Snrpa	2.24297800861387e-54	1.10927	0.742	0.436	5.45783838836012e-50
Naf1	5.44677924573414e-38	1.1085	0.603	0.341	1.32536479386449e-33
Ints13	1.21480151179102e-37	1.10721	0.613	0.354	2.9559765186411e-33
Paxx	4.41588471267081e-16	1.10671	0.211	0.095	1.07451722713419e-11
Gltp	4.57132703581207e-37	1.10651	0.554	0.296	1.11234100762415e-32
Dmac1	2.34039791621686e-29	1.10625	0.404	0.197	5.69489024953049e-25
Fancm	1.29797823084737e-12	1.10552	0.235	0.125	3.15837042912092e-08
Gtf2a2	6.57937589581588e-72	1.1052	0.816	0.502	1.60095953672888e-67
Rack1	2.89115298313286e-156	1.10469	0.983	0.89	7.0350425538572e-152
Rbm3	2.26582939671609e-104	1.10452	0.924	0.687	5.51344267102926e-100
Rhobtb3	9.67521532754966e-31	1.10448	0.484	0.258	2.35427014565266e-26
Ccs	6.14633276033191e-25	1.10388	0.406	0.213	1.49558715057156e-20
Mrpl16	1.19141035027677e-29	1.10337	0.391	0.186	2.89905880532846e-25
Cdpf1	1.25575091290766e-15	1.10329	0.186	0.081	3.05561869637821e-11
Alyref	1.06299733704869e-75	1.1028	0.844	0.528	2.58659142024057e-71
Mta1	3.70536245123416e-40	1.10272	0.605	0.343	9.01625845258809e-36
Osgin2	4.12775456728012e-19	1.10185	0.175	0.064	1.00440651885627e-14
Med31	4.10249250599846e-23	1.10073	0.438	0.254	9.98259501484604e-19
Cnih1	4.03074693203817e-32	1.10069	0.528	0.294	9.80801650972849e-28
Map1s	1.89871952694835e-16	1.10059	0.25	0.122	4.62015422492343e-12
Mycbp2	1.26021190262454e-131	1.10012	0.983	0.913	3.0664736226563e-127
1600010M07Rik	9.8440076130465e-23	1.10002	0.328	0.157	2.3953423724826e-18
B9d1	9.16414731020466e-17	1.09954	0.264	0.133	2.2299119649921e-12
Apmap	1.30424855586392e-25	1.09945	0.351	0.167	3.17362801098369e-21
Ranbp1	8.08438755439595e-88	1.09887	0.899	0.602	1.96717402361117e-83
Telo2	9.51161283949626e-18	1.09768	0.269	0.132	2.31446075223462e-13
Cby1	2.23234857270069e-14	1.0971	0.205	0.098	5.43197378195258e-10
Rab4a	1.13379323262777e-11	1.09664	0.173	0.083	2.75885907295316e-07
Rpl5	2.12038130064671e-168	1.09642	0.989	0.906	5.15952381886363e-164
Ston1	1.61504174088316e-58	1.09636	0.753	0.454	3.92988106809099e-54
Ndufb5	6.85226872524581e-74	1.09597	0.863	0.533	1.66736254891406e-69
Atp5g2	3.22887338780627e-100	1.09546	0.943	0.694	7.85681761454899e-96
Phf5a	3.61926463680675e-47	1.09514	0.687	0.398	8.80675664074186e-43
Spout1	7.83622726615883e-24	1.09512	0.34	0.163	1.90678918067443e-19
Thumpd2	1.84041593379191e-12	1.09481	0.216	0.11	4.47828409169584e-08
Sptbn2	3.10626595452881e-32	1.09441	0.427	0.205	7.55847694715496e-28
Rsl24d1	5.13987557136818e-43	1.09399	0.649	0.373	1.25068592278102e-38
Fzd3	4.40854595952679e-33	1.09388	0.505	0.257	1.07273148833165e-28
Nr4a1	4.33955782635751e-14	1.09379	0.416	0.266	1.05594460588757e-09
Stat5b	4.68784818303143e-60	1.09287	0.839	0.561	1.14069409837704e-55
Gnb1l	3.82090679332511e-09	1.09281	0.195	0.109	9.29741250019799e-05
Ubr1	2.73003075445595e-49	1.09247	0.672	0.369	6.64298383481767e-45
Ppan	4.25024603120494e-42	1.09181	0.558	0.274	1.0342123667731e-37
Miga1	3.41853513578905e-32	1.09135	0.423	0.199	8.3183215459155e-28
Rexo2	2.53031506291928e-50	1.09121	0.7	0.401	6.15701564260149e-46
Tuba1b	2.8571281433841e-75	1.09085	0.723	0.354	6.95224991129654e-71
Tsen34	9.97118773943865e-66	1.0908	0.769	0.445	2.42628911263761e-61
Stoml2	6.21920192655832e-45	1.08976	0.649	0.363	1.51331840478943e-40
Iqce	2.78251619719635e-25	1.08962	0.336	0.154	6.77069666263787e-21
Tsfm	1.86001838698295e-42	1.08957	0.579	0.296	4.52598274104561e-38
Bop1	9.06295194036469e-30	1.08935	0.419	0.204	2.20528809564894e-25
Mrpl11	4.59597415280826e-38	1.0893	0.583	0.32	1.11833839060283e-33
Pgam5	1.50102431028032e-29	1.08884	0.452	0.228	3.65244245420511e-25
Zfp955a	1.49258348863979e-14	1.08824	0.243	0.124	3.63190340290719e-10
Tpra1	1.07225220330441e-16	1.08807	0.288	0.15	2.60911128630062e-12
Farp2	1.66307739720256e-34	1.0878	0.476	0.234	4.046766230613e-30
Rwdd3	2.20351423716956e-13	1.0877	0.192	0.089	5.3618111933047e-09
Lratd1	1.55481060568816e-21	1.08707	0.319	0.156	3.783320646821e-17
Sod1	1.7576645438449e-50	1.08696	0.677	0.372	4.2769251345378e-46
Acsl5	4.54180289481045e-59	1.08627	0.755	0.43	1.10515689839423e-54
Ttc27	2.50509771024885e-46	1.08606	0.634	0.334	6.09565425834854e-42
Lzic	1.39549991523457e-17	1.08572	0.406	0.245	3.39566994374027e-13
Nfu1	2.38645224952994e-40	1.08547	0.602	0.334	5.80695425878121e-36
St13	1.63507985655131e-119	1.08532	0.964	0.849	3.97863981494631e-115
Ddx27	6.32774823035401e-55	1.0853	0.774	0.474	1.53973097689204e-50
Lpar3	4.72837175168069e-37	1.08513	0.738	0.498	1.15055469833646e-32
Impa1	6.74072766463262e-24	1.08505	0.397	0.208	1.64022126263506e-19
G6pc3	1.32351812822346e-25	1.08421	0.387	0.196	3.22051666140615e-21
Rps17	9.18101901338146e-144	1.08408	0.972	0.859	2.23401735652611e-139
Nolc1	5.12042257745536e-71	1.08363	0.86	0.529	1.24595242577221e-66
Glrx3	4.31030399917122e-65	1.08314	0.852	0.578	1.04882627211833e-60
Zbtb1	1.47520240239128e-55	1.08285	0.778	0.497	3.58961000573869e-51
Spata6l	6.20620888326369e-12	1.0824	0.12	0.047	1.51015680756455e-07
Snx17	4.37427325943991e-41	1.082	0.594	0.314	1.06439191221951e-36
Hemk1	1.68847270337731e-07	1.08131	0.116	0.057	0.00410856
Rps16	1.98905832844815e-170	1.08114	0.987	0.918	4.83997563061288e-166
A730017L22Rik	2.351852293782e-12	1.08109	0.171	0.08	5.72276218645974e-08
Ddx18	7.87477063441968e-62	1.08063	0.757	0.425	1.91616793847334e-57
Pxmp4	2.2105457705179e-10	1.08016	0.144	0.068	5.37892102340122e-06
Qtrt1	2.5982713765309e-28	1.07992	0.436	0.224	6.32237374051263e-24
Galnt11	6.82149403218934e-38	1.07926	0.662	0.405	1.65987414285263e-33
Gpr89	2.21926938466948e-34	1.07907	0.575	0.323	5.40014819371625e-30
Gtf2i	2.52354254158581e-86	1.07886	0.918	0.685	6.14053606644075e-82
Rpl29	1.83888665054497e-121	1.07869	0.951	0.798	4.47456288677109e-117
Hyi	4.33952711621045e-20	1.0785	0.294	0.143	1.05593713318749e-15
Tpst2	1.77255828331215e-33	1.07848	0.526	0.284	4.31316607078346e-29
Cetn3	5.45827252197125e-45	1.07795	0.668	0.382	1.32816145277126e-40
Cacybp	2.33930163488243e-73	1.07779	0.85	0.539	5.69222266815941e-69
Zbtb41	6.03268685780849e-39	1.07648	0.594	0.327	1.46793369311054e-34
Pigt	1.88291375129236e-52	1.07584	0.757	0.467	4.58169403101971e-48
Ap1m1	1.62766785692095e-16	1.07561	0.213	0.095	3.96060419624574e-12
Cbarp	2.65369440923997e-09	1.07501	0.112	0.049	6.45723460600362e-05
Hltf	1.55262703466729e-46	1.0747	0.689	0.394	3.77800736345592e-42
Ears2	2.17508686423292e-21	1.07393	0.34	0.171	5.29263886673797e-17
Rpl34	1.40682922771661e-157	1.07389	0.983	0.872	3.42323755980283e-153
Ddx21	5.18463510803771e-84	1.07372	0.92	0.613	1.26157726083881e-79
Ubl4a	2.11225434853731e-26	1.07363	0.452	0.25	5.13974850629584e-22
Rnf125	1.8002944671102e-10	1.07359	0.108	0.043	4.38065652681925e-06
Dynlt2a2	3.19908977803594e-21	1.07302	0.22	0.087	7.78434515689486e-17
1700029J07Rik	1.61803358344126e-08	1.07298	0.125	0.06	0.000393716
Wdr89	3.92673562627038e-35	1.07272	0.565	0.325	9.55492579940372e-31
Ptms	1.14198144730534e-57	1.07154	0.846	0.599	2.77878345572808e-53
AA465934	3.92470128124763e-17	1.0715	0.235	0.11	9.54997562765987e-13
Mospd1	6.76872780833764e-29	1.07026	0.467	0.254	1.6470345376028e-24
Ppih	9.42014155144432e-30	1.07009	0.461	0.238	2.29220304371295e-25
Tcp1	3.0313558491827e-94	1.06975	0.917	0.659	7.37619818781626e-90
Dph5	7.22333425333557e-32	1.06869	0.397	0.18	1.75765392386414e-27
Rpusd2	1.88305367216058e-08	1.06804	0.091	0.038	0.000458203
Fam117a	2.51905054586007e-11	1.06766	0.201	0.103	6.12960569324131e-07
Agk	1.31504330866064e-16	1.06762	0.294	0.153	3.19989488296393e-12
Cystm1	1.36988672534577e-80	1.06752	0.937	0.74	3.33334536878387e-76
Rwdd4a	4.5985766196912e-35	1.06738	0.584	0.348	1.11897164886946e-30
Hras	4.17969748985175e-47	1.06717	0.636	0.347	1.01704579020563e-42
Heatr1	1.95910979418418e-48	1.0662	0.67	0.37	4.76710186218835e-44
Timm9	2.27498984023178e-42	1.06617	0.613	0.329	5.53573277823598e-38
Mcm6	4.57941854193657e-30	1.0635	0.366	0.165	1.11430991380943e-25
Sort1	3.55185545058475e-57	1.06346	0.833	0.616	8.64272986790788e-53
Ptcd2	3.98587556718848e-24	1.06303	0.419	0.228	9.69883101763972e-20
Borcs5	2.16593135336346e-26	1.06206	0.368	0.175	5.27036076213931e-22
Lsm4	1.29866421020839e-44	1.06204	0.666	0.379	3.16003962270007e-40
Pfdn2	8.19596344716719e-90	1.06202	0.903	0.686	1.99432378559919e-85
Kpna2	8.61327849317248e-17	1.06138	0.254	0.126	2.09586905574366e-12
Emc8	2.48847041980472e-40	1.0613	0.611	0.332	6.05519507251083e-36
Clns1a	1.27171867865374e-43	1.06123	0.689	0.414	3.09447306076814e-39
Smim13	7.31792913855282e-25	1.06113	0.393	0.199	1.78067169728406e-20
Dnajc15	2.13422708930223e-56	1.06111	0.755	0.426	5.19321477639911e-52
Prex1	4.73174146387162e-11	1.06079	0.222	0.12	1.15137465040388e-06
Gmps	2.21736025842523e-56	1.06076	0.795	0.503	5.39550271682612e-52
Eif3k	4.43552947476705e-78	1.06024	0.89	0.657	1.07929738709507e-73
Mrpl12	2.39156745156523e-54	1.05996	0.755	0.441	5.81940107989367e-50
Pgap2	1.13701801985094e-67	1.05898	0.854	0.561	2.76670594770329e-63
Thg1l	6.57969366946744e-19	1.05821	0.266	0.127	1.60103686059151e-14
Tfb2m	2.87309999634858e-33	1.05587	0.546	0.309	6.99111422111501e-29
Rce1	8.39181256373458e-24	1.05585	0.378	0.194	2.04197975113353e-19
Fkbp1a	5.4432371202563e-72	1.05566	0.871	0.624	1.32450288847196e-67
Tmem41a	1.23168081639775e-09	1.05467	0.129	0.059	2.99704893054065e-05
Ndufa8	2.46115028219869e-62	1.05454	0.806	0.514	5.98871698167408e-58
Slc52a3	3.88753764680884e-20	1.05452	0.343	0.177	9.45954535597994e-16
Emx2	1.76497946758276e-66	1.05449	0.869	0.628	4.29472453846914e-62
Polr3g	5.50087581088539e-20	1.05434	0.285	0.134	1.33852811106274e-15
Cluh	7.25414790903412e-44	1.0543	0.596	0.299	1.76515181070527e-39
Cmbl	8.26902218356166e-10	1.05369	0.19	0.103	2.01210116792606e-05
1110038B12Rik	4.67185811499005e-47	1.05332	0.713	0.421	1.13680323512053e-42
Snrpb	2.19511721480274e-68	1.0529	0.86	0.589	5.34137871877952e-64
Pabpc4	2.98071856937018e-54	1.05269	0.742	0.441	7.25298249484846e-50
Vdac3	9.03150474112413e-57	1.05266	0.801	0.545	2.19763604865773e-52
Ccdc66	2.66853182909521e-24	1.05248	0.342	0.164	6.49333849973738e-20
Nfic	1.13223795499841e-29	1.05108	0.416	0.202	2.75507461589764e-25
Rtcb	6.35433974828187e-55	1.05069	0.784	0.499	1.54620149094943e-50
Slc25a12	7.52494584467653e-18	1.05033	0.292	0.147	1.83104507238514e-13
Trappc1	8.60941285284924e-32	1.04982	0.529	0.293	2.09492842948381e-27
Tmem158	4.161841168175e-27	1.04967	0.556	0.342	1.01270081145202e-22
Ptov1	4.00774958285751e-47	1.0496	0.674	0.391	9.75205705996719e-43
Ak3	7.84629093848247e-68	1.04918	0.873	0.619	1.90923797406094e-63
Cyfip2	3.02630367176797e-16	1.04905	0.118	0.037	7.36390472451299e-12
Itm2c	6.47818098534408e-61	1.04863	0.835	0.577	1.57633577916377e-56
Exosc5	1.45972905319807e-35	1.04813	0.575	0.32	3.55195870514687e-31
Pigf	4.05461732969629e-16	1.04765	0.277	0.144	9.86610034834999e-12
Dtwd2	5.9687843495099e-15	1.04724	0.23	0.11	1.45238429576624e-10
Tefm	3.08889148687191e-14	1.046	0.199	0.093	7.51619965500543e-10
ENSMUSG00000121596	4.36143321422754e-11	1.04595	0.182	0.092	1.06126754401799e-06
Cetn2	1.74477032973271e-31	1.04588	0.526	0.288	4.24554964333862e-27
Sf3b6	1.26334023004943e-76	1.0456	0.879	0.612	3.07408578177927e-72
Eci1	1.00191452152028e-42	1.04517	0.683	0.404	2.4379586052153e-38
Zfp275	4.387203762592e-08	1.04504	0.135	0.068	0.00106754
Pja1	1.82374483174041e-28	1.0448	0.467	0.25	4.43771829907395e-24
Dicer1	3.16947635212802e-55	1.04464	0.805	0.524	7.7122868076331e-51
Slc25a15	4.0030908330182e-09	1.04388	0.152	0.077	9.7407209239832e-05
Dnajc4	8.56410200984424e-14	1.04379	0.218	0.108	2.0839029420554e-09
Rplp2	1.57450210798413e-156	1.04356	0.981	0.917	3.83123597935778e-152
Rab5if	1.05614960840013e-59	1.04281	0.786	0.461	2.56992884212005e-55
Hdac2	5.5691074513636e-63	1.04247	0.827	0.555	1.3551309161403e-58
Phax	5.19191924601204e-49	1.042	0.736	0.456	1.26334971013211e-44
Mettl16	1.45323937898701e-48	1.0419	0.732	0.444	3.53616738088909e-44
Ndufb6	4.05113185737105e-40	1.04158	0.66	0.393	9.85761914854098e-36
Pam16	4.89113799626008e-31	1.04143	0.493	0.269	1.19016060862997e-26
Nme2	1.30021619989702e-94	1.04052	0.937	0.646	3.16381607920941e-90
Fdx1	2.54511975881925e-33	1.04025	0.533	0.298	6.19303990913489e-29
Mthfd1l	1.05046743757562e-30	1.03983	0.446	0.22	2.55610241585274e-26
Mrps23	1.9993012431052e-27	1.03935	0.444	0.238	4.86489971484787e-23
Isyna1	1.17605060229717e-33	1.03901	0.435	0.203	2.8616839305697e-29
Gemin7	4.558551402912e-22	1.03852	0.419	0.239	1.10923231287058e-17
Mcm3	1.00169326647746e-30	1.03843	0.361	0.159	2.43742022531959e-26
Slc35f3	7.03958389359379e-12	1.03752	0.26	0.148	1.71294194882818e-07
Dhx29	3.61856124777811e-33	1.03659	0.524	0.276	8.80504508421847e-29
Ccdc86	1.29598162064822e-46	1.03594	0.658	0.352	3.15351207752331e-42
Iqsec1	4.39599032324051e-15	1.03505	0.237	0.116	1.06967632535411e-10
Pank1	1.04052454935025e-14	1.03457	0.245	0.123	2.53190838593395e-10
Noc4l	1.34920311678719e-26	1.03453	0.381	0.188	3.28301594407827e-22
Mical2	4.49657458858906e-38	1.03413	0.59	0.316	1.09415149464138e-33
Zscan22	1.91689148872896e-09	1.03402	0.14	0.067	4.66437205952418e-05
B3galt6	9.46539491445394e-14	1.03386	0.228	0.117	2.30321454453408e-09
Pnkd	7.38067696347472e-27	1.03332	0.476	0.265	1.7959401255223e-22
Pgpep1	4.4207040013394e-40	1.03255	0.645	0.384	1.07568990464592e-35
Mrpl50	2.90071561758487e-36	1.03231	0.583	0.325	7.05831131226925e-32
Gtpbp4	8.45900303934405e-67	1.03226	0.848	0.573	2.05832920956359e-62
Srgap3	1.60316616534749e-48	1.03223	0.85	0.653	3.90098423014005e-44
Gm50240	3.57379867810659e-09	1.0317	0.121	0.055	8.69612432343676e-05
Ccnb3	3.4902290811771e-35	1.03105	0.609	0.351	8.49277442322825e-31
Ndufb10	4.64616136118742e-49	1.03081	0.719	0.418	1.13055044401773e-44
Mrpl23	1.10664995021376e-45	1.03055	0.713	0.416	2.69281132385514e-41
Dock9	9.99083257571626e-76	1.03046	0.918	0.697	2.43106929064904e-71
Pygb	6.95799573754928e-37	1.0292	0.634	0.365	1.69308910281787e-32
Zfp959	1.67811377319015e-08	1.02898	0.163	0.088	0.000408335
Spcs1	8.0045492793871e-68	1.02827	0.858	0.544	1.94774697615326e-63
Zkscan8	8.6237740561506e-21	1.02814	0.317	0.154	2.09842294108312e-16
Prpf31	2.72441773236297e-35	1.02763	0.522	0.27	6.62932566815882e-31
Pms2	4.00545759705834e-14	1.02756	0.207	0.099	9.74647997092206e-10
Nol10	9.35345101617281e-31	1.02705	0.617	0.376	2.27597523576533e-26
Cul7	4.15865336015546e-19	1.02616	0.222	0.093	1.01192512212663e-14
Yrdc	9.00252023085159e-33	1.02554	0.543	0.302	2.19058324777312e-28
Gm48742	3.42893558960744e-09	1.02397	0.112	0.049	8.34362897019179e-05
Commd6	1.75157247651869e-27	1.02381	0.539	0.312	4.26210130711294e-23
Fam174a	9.49516842782102e-20	1.02372	0.362	0.197	2.31045933354169e-15
Cdc23	4.92197854478841e-28	1.02361	0.501	0.281	1.19766503930336e-23
Itpa	9.56213470301776e-41	1.02323	0.632	0.344	2.32675423728531e-36
Snrpd1	3.89091326372596e-78	1.023	0.896	0.621	9.46775924462438e-74
Micos10	6.07420766983991e-87	1.02299	0.915	0.674	1.47803695230214e-82
Atp13a2	2.90985483738057e-17	1.02275	0.332	0.183	7.08054977579814e-13
C87436	2.45483749428591e-21	1.02246	0.349	0.18	5.97335607484591e-17
Pigbos1	1.57203708839102e-24	1.02218	0.408	0.22	3.82523784718188e-20
Coq4	5.15321412462976e-13	1.02195	0.26	0.142	1.25393159294616e-08
Polr3d	1.8929458459767e-33	1.02173	0.602	0.357	4.6061051270151e-29
Rabep1	3.0748199793092e-56	1.02112	0.77	0.457	7.48195945565306e-52
Pip5k1b	4.50017209753652e-34	1.02066	0.575	0.318	1.09502687649356e-29
Txn2	7.59408088833652e-50	1.02031	0.751	0.453	1.84786770255892e-45
Arl14ep	1.63150036703755e-23	1.02012	0.395	0.205	3.96992984311246e-19
Tceal9	3.78508757521944e-48	1.01948	0.746	0.442	9.21025359678147e-44
Coa8	1.33807284544727e-33	1.01922	0.584	0.349	3.25593265482684e-29
Dtx3	2.84347939783383e-14	1.01916	0.125	0.045	6.91903841874905e-10
Timm22	3.42745808443511e-29	1.01886	0.454	0.238	8.34003375685594e-25
Hyal1	1.6965893584439e-08	1.01858	0.121	0.057	0.000412831
Btf3	1.07825976258199e-132	1.01814	0.972	0.83	2.62372948029075e-128
Pms1	1.19902221907765e-15	1.01812	0.213	0.097	2.91758076568164e-11
Gnl3	2.15390083724235e-60	1.01794	0.81	0.473	5.24108690726181e-56
Sirt5	4.79056850409019e-15	1.01722	0.211	0.098	1.16568903410026e-10
Sumf2	1.2600626580303e-16	1.01717	0.311	0.167	3.06611046578512e-12
Spring1	3.02012068406797e-13	1.01708	0.211	0.104	7.3488596605426e-09
Gpx2	2.18371846739064e-08	1.01699	0.087	0.036	0.000531364
Hebp2	1.08431167273846e-39	1.01644	0.636	0.36	2.6384555932745e-35
Lyrm4	9.14460442829677e-14	1.01622	0.241	0.125	2.22515659553745e-09
Rae1	3.65296243597876e-43	1.01595	0.685	0.419	8.88875349546711e-39
Ablim2	9.48770438527554e-10	1.01576	0.118	0.051	2.3086431080691e-05
AI506816	7.00776199256253e-38	1.01536	0.518	0.25	1.70519872565024e-33
Pprc1	6.44008856594247e-34	1.01532	0.516	0.265	1.56706675075078e-29
Ankrd26	1.38999430437736e-13	1.01494	0.214	0.105	3.38227314084144e-09
2610528J11Rik	6.00379439131709e-21	1.01494	0.378	0.206	1.46090328923919e-16
Ywhab	8.99346792434453e-97	1.01427	0.935	0.748	2.18838055003075e-92
Maz	1.84315107034492e-25	1.0133	0.414	0.218	4.4849394994703e-21
Ssrp1	5.78371978345216e-65	1.01328	0.841	0.547	1.40735253490741e-60
Azin1	4.94629865484195e-48	1.01235	0.886	0.697	1.20358285168269e-43
N6amt1	2.30619488367684e-23	1.01219	0.385	0.2	5.61166401045085e-19
Epha4	2.89203799967759e-58	1.01207	0.831	0.505	7.03719606461547e-54
Dnlz	1.37106872482967e-15	1.01149	0.332	0.191	3.33622152812803e-11
Pold1	3.85459970748854e-11	1.01146	0.137	0.059	9.37939746823187e-07
Bcs1l	2.97427973450516e-08	1.01138	0.129	0.064	0.000723731
Pole3	1.20878323933655e-22	1.01115	0.435	0.253	2.94133225627763e-18
Rps6	9.96791678916378e-134	1.011	0.972	0.859	2.42549319230722e-129
Eif3e	3.3609427388885e-98	1.01071	0.922	0.738	8.17818196653738e-94
2310039H08Rik	1.3175561638157e-20	1.01069	0.385	0.212	3.20600941341275e-16
Eef1b2	2.99320648057181e-145	1.01002	0.979	0.884	7.2833693291754e-141
Wdr75	1.98388697759586e-64	1.00945	0.814	0.493	4.827392182584e-60
Mrps12	4.86462022675042e-37	1.00935	0.602	0.341	1.18370803977518e-32
Mri1	5.11553631052064e-34	1.00891	0.526	0.279	1.24476345043899e-29
Riox1	8.72874045014804e-15	1.00852	0.277	0.151	2.12396441373452e-10
Gramd3	8.75469509633805e-53	1.00842	0.884	0.646	2.13027995779194e-48
Prdm11	5.8005692272742e-20	1.00814	0.273	0.126	1.41145251007263e-15
Rpl18	5.30529492183542e-140	1.008	0.981	0.886	1.29093741333021e-135
Lpcat1	6.01309900094661e-09	1.00677	0.106	0.046	0.000146317
Fahd2a	2.76965326747323e-15	1.00639	0.249	0.126	6.73939729574261e-11
Tsen15	3.88376279202998e-24	1.00628	0.357	0.175	9.45036000184654e-20
Cyp4v3	4.17701071511373e-08	1.00597	0.078	0.03	0.00101639
Fbxl14	5.34590630547592e-17	1.00581	0.313	0.17	1.30081938131146e-12
Lyrm2	1.33728105542353e-24	1.00571	0.404	0.215	3.25400599216207e-20
Cops7b	7.52967898710527e-19	1.00571	0.351	0.192	1.83219678793233e-14
Dynlt3	1.1610998111938e-46	1.00499	0.753	0.474	2.82530417057787e-42
Atp5g1	5.81159221933174e-83	1.00472	0.911	0.627	1.41413473472999e-78
Hsp90aa1	1.66270509826894e-115	1.00452	0.968	0.823	4.0458603156178e-111
3110009E18Rik	1.93236853899165e-19	1.00403	0.26	0.118	4.70203236592839e-15
Cpox	6.87221278347609e-30	1.00367	0.493	0.267	1.67221553660324e-25
Guf1	3.00017611223074e-31	1.00339	0.471	0.241	7.30032853389107e-27
Gnl2	1.9429049117349e-50	1.00338	0.769	0.499	4.72767052172453e-46
Syde2	8.26933439064003e-11	1.0031	0.167	0.081	2.01217713727444e-06
Thap7	4.1345516042398e-09	1.00229	0.203	0.117	0.000100606
Rpl35a	8.69573567084301e-145	1.00222	0.975	0.885	2.11593336078623e-140
Sprtn	8.5910400250737e-11	1.00184	0.235	0.133	2.09045776930118e-06
Exog	2.44544840279949e-15	1.00147	0.213	0.098	5.95050959853199e-11
Psmd12	3.49103698227203e-64	1.00099	0.86	0.605	8.49474028896252e-60
Rapgef3	4.47779642395021e-08	1.00095	0.11	0.051	0.00108958
Ugp2	8.20897069615669e-78	1.00075	0.928	0.749	1.99748883949581e-73
6430590A07Rik	3.44079754580082e-09	1.00056	0.118	0.053	8.37249266819713e-05
Orc6	9.24249960555153e-33	1.00031	0.455	0.227	2.24897742901885e-28
[truncated: 1,011 more rows]

## Sheet: Conserved_Genes
UP_1999	DN_1011	UP_245	DN_150		170 common elements in "Estrus_Up" and "Diestrus_Up":		52 common elements in "Estrus_Dn" and "Diestrus_Dn":
Estrus	Estrus	Diestrus	Diestrus		Slc13a5		Cux1
Sox1ot	Gpd1	C1qtnf9	Tspan1		Lrp2		Serinc2
Gm37381	Nedd4l	Nr4a3	Ssr2		Far2os2		Ckmt1
Cldn22	Dmd	Far2os2	Ran		Cyp26a1		Clu
Slc13a5	Snx13	Synpo2	Lsm4		Far2os1		Ass1
Col28a1	Cldn4	Pinlyp	Pcna		Mt3		Mgst3
Gria1	Trim27	9530059O14Rik	Clic1		Slc2a12		Atp2c2
Tekt1	Tiam1	Slc2a3	Pgd		Mme		Fut2
Rtn1	Ptprs	Gm40578	Tubb4b		Susd2		Lpcat4
Lrp2	Mbnl2	Slc5a11	H2az1		Dnah14		Pdlim7
Gm56832	Ppfibp2	Tm4sf1	Elf3		Tgfbi		Fbln1
Mmp10	Meis1	Gpr146	Odc1		9530059O14Rik		Gmnn
Nkain3	Rigi	Arc	Cux1		Gm29904		Efhd2
Far2os2	Slc12a2	Smtnl2	Fbln1		9530014B07Rik		0610040J01Rik
Sv2c	Tnik	Tll1	Lsm5		Slc5a11		Ier3
Grin2b	Rap1gap2	Efhd1	Klf4		Ckb		Prxl2a
Kcnd3	Rps6ka1	Hopx	Ckmt1		Prr16		Spink12
Cyp26a1	Mroh1	Lrp2	Ier3		Rmst		Tmprss4
Sult1a1	Asic2	Wnt11	Krt7		Arl4d		Padi2
Far2os1	Ptprk	Rims1	Rpn2		Rp1		Slc40a1
Slc16a12	Cpne8	Slc13a5	Galnt12		Nsg2		Muc20
Gm6209	Fbxo34	Arl4d	Tubb5		Ihh		Muc1
Mt3	Ldlrad4	Jam2	Tuba1b		Ggt6		Sprr1a
Slc2a12	Lpgat1	Tgfbi	Baz1a		Wnt11		Ceacam1
Gm42864	Tmem243	Plcl1	Cks1b		Npl		Samd9l
Sez6l	Tmem184b	Kcnb2	Nme1		Pkhd1l1		Cacna2d3
Mme	Fgd6	Slc2a12	Gng12		Nhs		Ugdh
Gm47604	Mapk6	Ckb	Hspa5		Fndc5		Tent5a
Acbd7	Wasl	Ccn2	Plac8		Bambi		Ncoa7
Susd2	Eif2ak3	Rbm24	Slc40a1		Chst9		Capn5
Gm13003	Crim1	Ihh	Ncoa7		Il17rb		Melk
Mgat3	Cux1	Syn2	Sulf2		Slc2a3		Golm1
Dnah14	Igf1r	Ggt6	Phlda1		Plpp3		Tgm2
Adra2c	Esyt2	Susd2	Galnt3		Hpgds		Lcn2
Cdh16	Specc1	Sox5	Tcof1		Aqp11		Hgfac
Prdm5	Serinc2	Il17rb	Tmpo		Calb1		Alpl
Cbs	Cyba	Mme	Gusb		Timp3		Fcgbp
Tgfbi	4930422I22Rik	Rp1	Ceacam1		Sox5		Cavin3
Gm47134	Eps8l1	Npl	Stmn1		Synpo2		Muc4
Ube2ql1	Ckmt1	Hpgds	Pde7b		Rims1		Ly6a
Gpr176	Hoxb4	Mok	Tst		Gm40578		Sprr2f
Dok5	Ifih1	Prss23	Sox9		Hopx		Clca1
9530059O14Rik	5031425E22Rik	Timp3	Hmgn5		Slc25a48		Cfb
Gm29904	Tbc1d1	Dnah14	Dhcr24		Thrsp		Ltf
Clec14a	Pfkl	Plpp3	Ly6a		Efhd1		Irag2
Topaz1	Clybl	Kctd12	Pdia6		Ebf4		Trpv6
Slc1a3	Trpm4	Arhgef26	Lig1		Spsb4		C3
9530014B07Rik	Sec11c	Pik3ap1	Carhsp1		Ccn2		Ctsl
Cldn8	Atp6v0a2	Edn1	Hmgn2		Gstm1		Pglyrp1
Gm32342	Igtp	Acod1	Fcgbp		Klf12		Plac8
Slc5a11	Gphn	Ankrd29	Cbr2		Ccnd2		Spp1
Tmem100	Tor1aip1	Cyp26a1	Prxl2a		Ifitm1		Prap1
Klhl31	H2-D1	Cap2	Capn5		Emb
Fn3k	Skap2	Cln5	Lrig1		Cyb5r3
Clec10a	Ifngr1	Cited4	Sprr1a		Nipsnap1
Gulo	Tpp1	Pkdcc	Kcnn4		Caprin2
Cpxm1	Zcchc2	Ebf4	Efhd2		Hdc
Sptlc3	Slc44a1	Thrsp	Tcim		Entrep1
Ckb	Sash1	Lrrc36	0610040J01Rik		Pinlyp
Gm36569	Gsap	Sult1d1	Muc1		Sult1d1
Lrrc7	Cd276	Hdc	Sting1		Kcnb2
Prr16	2200002D01Rik	Pcx	Samd9l		Gcnt3
Ccn4	Hacd2	Mt3	Unc5cl		Gstm7
ENSMUSG00000121444	Tcn2	Spsb4	Dhrs9		C1qtnf9
Paqr6	Mindy2	Cnn3	Hmgb2		Atp2b2
Gm41177	Zbtb18	Gm29904	Pdlim7		Stox2
Aox4	Dagla	Gsn	Top2a		Gstm2
Pla2g10os	Rhoc	Far2os1	Sprr2f		Nrg1
Nwd1	Syne2	Lgr5	Crabp2		Sgk1
Col9a2	Vwa5a	Tcaim	Rrm1		Gsn
Rmst	Adam10	Mt2	Msmo1		Sox17
Pde3a	Tpk1	Entrep1	Nrtn		Id2
Lingo4	Pvr	Nsg2	Dut		Slc39a14
Clvs2	Pstpip2	Ncald	Hsph1		Palld
Mcoln2	Dhx32	Pik3ip1	Mcm5		Pik3ap1
Ndp	Vopp1	S100pbp	Cfb		Syn2
Arl4d	Fosl2	Lpar3	Sfn		Pkdcc
Rp1	Cpeb4	Calb1	Ccdc34		Cnn3
4930426D05Rik	Slc35f6	Nhs	Prss22		Wnt5a
Nsg2	Nampt	Cobl	Fut2		Pcx
Tet1	Ralgds	Slc39a14	Mcm3		Aldh7a1
Dclk1	Gab2	AI480526	Uhrf1		Nr4a3
Slco4c1	Pam	Rmst	Ddx39a		Sccpdh
Wfdc6a	Pgm2	Itpr2	Atp2c2		Jam2
4930473H19Rik	Ampd3	Bambi	Ncapd2		Cap2
Far2	Myo5b	Ntn4	Ctsl		Tcaim
Ihh	Clu	Chst9	Ugdh		Msx1
Ggt6	Rel	Me3	Shmt2		Cited4
Wnt11	Plet1os	Mgll	Ldlr		Nhsl2
Gm3854	Cln3	Gsap	Mgst3		Adamts6
Adcy8	Psmb9	Slc1a1	Fdps		Tgfbrap1
Crybb1	Tjp3	Iqcc	Muc20		Mt2
Npl	Foxo1	Klf12	Pttg1		Mtr
Cntn4	Ptpru	Abca1	Serinc2		Adgrl3
Pla2g10	Pdlim4	Frmd5	Tmprss4		Frmd5
Pkhd1l1	Sox4	Tsc22d3	Clca1		Ncald
Tmod2	Reps2	Sccpdh	Morrbid		Tsc22d3
Matn4	St14	Slc22a4	Cks2		Gpt2
Nsg1	Cdcp1	S100g	Cenpw		Lrpap1
Klhl14	B2m	Plekhs1	Mall		Rbm24
Rdh12	Parp12	Caprin2	Lpcat4		Zmpste24
Gm29260	Bhlhe40	Tcp11l2	Ltf		Tmem229b
Gxylt2	Ass1	Aqp11	Padi1		Cldn10
9330185C12Rik	Nhsl1	Pfkfb3	Tent5a		Snx8
Cyp4x1	Gfpt1	Tpm1	Cenpf		Gsta4
Rab40b	Cdk19	Ptger2	Clu		Pgr
Nhs	Tor1aip2	Per1	Prap1		Cbx6
Gm35254	Tgfbr2	Ccnd2	Trpv6		Slc6a6
Gm47136	Trp53inp1	Adamts6	Muc4		Kctd12
Gm57064	Mgst3	Nt5e	Mfsd4a		Chdh
Fndc5	Itpk1	Rasd1	Idi1		Prag1
Vit	Dpy19l1	Xkr4	Padi2		Tmem123
Them5	Irak2	Mt1	Anln		Dst
Igdcc3	Stx7	Tle2	Cyp51		Rnf24
Bambi	Atp8a1	Prr15	Mad2l1		Sfi1
Chst9	Stk19	Jazf1	Spp1		Plxnb1
Rragb	Atg10	Etnk1	C3		Gcnt2
Cdh5	Mmp23	Atp1b1	Ass1		Lgr5
Gm48703	Sgpp2	Tfcp2l1	Mlph		Myd88
Myrip	Atp2c2	Nr4a1	Ccnb2		Arhgap42
Gpr12	Zc3hav1	Npc1	Hs3st1		Ptger2
Rln1	Tnip1	Prr16	Cavin3		Nav2
Plb1	Dglucy	Kctd14	Pclaf		Tfcp2l1
Serpinb12	Macc1	Ctsd	Pglyrp1		Ap1s3
Gm43821	Zswim4	Ypel3	Ccna2		Tle2
Rgs6	Zfp217	Soat1	Tgm2		Fsd1l
Copz2	Khnyn	Fndc5	Cacna2d3		Jazf1
Il17rb	Akap13	Snx8	Cenpa		Plekhs1
Gm17396	Pkm	Gpt2	Slfn9		Mpc2
Ces1f	Anxa2	Sema3e	Cdk1		Per1
Fbln5	Dock4	Fsd1l	Alpl		Irf6
Fat3	Gab1	Slc25a33	Birc5		Pde7a
E230001N04Rik	Elk3	Nceh1	Hgfac		S100pbp
Pld5	Ephb2	Nipsnap1	Kif15		Elovl5
Gm21762	Esyt3	Pls3	Lcn2		Ctsd
Ppp2r2c	Las1l	Nhsl2	Golm1		Fzd6
Trim35	Tob1	Casz1	Gmnn		Cln5
Slc2a3	Isg20	Rtl8a	Spink12		Sema6a
Nudt11	Hivep2	Mtr	Racgap1		Rtl8a
Zkscan4	Nr3c1	Msx1	Cdca8		Eif4enif1
Fhl1	Fam20a	Zfp608	Melk		Arhgef26
Lgi1	Gcnt1	9530014B07Rik	Mki67		Kctd14
Plpp3	Fut2	Pkhd1l1	Pbk		Lifr
Adamts7	Fgl2	Slc25a48	Rrm2		Sdc4
Chst2	Plce1	Arrdc3	Tpx2		Plcl1
Plppr1	Helz2	Serping1	Irag2		Tm4sf1
Pid1	Plaur	Ptprr	Cdc20		Dach1
Hecw2	Creb3l1	Sfi1	Knstrn		Rasd1
Thbs1	Lpcat4	Tacc2	Ccnb1		Pacsin3
Actn2	Npas2	Atp2b2	Bub1b		Tpm1
Arsj	Gsto1	Heca	Ube2c		Adipor2
Klk8	Pdlim7	Dact2			Hif1a
Camk1g	Gm5089.1	Tmem229b			Glul
Cnn1	Sorbs1	Emb			Tnpo1
Dennd2a	Cradd	Gstm7			Prr15
Slc36a2	Zfp521	Nrg1			Kctd1
Cdh2	Vmp1	Prag1			Nbea
Hpgds	Tcf4	Nt5dc3			Itgb5
Pla2g7	Zfp503	Gramd3			S100g
Cacna1g	Tbc1d9	Lbp			Nudt4
Gm57048	Klhl24	Atf3			Nt5dc3
Gm57199	Fbln1	Ap1s3			Slc1a1
Aqp11	Slc28a3	Gpcpd1			Suco
Arhgap31	Ssh1	Pacsin3			Mycbp2
P3h3	Edem1	Tgfbrap1			Nr4a1
Calb1	Fes	Alox15			Lpar3
Gm22146	Cdk17	Sema6a			Tmem158
Gfap	Metrnl	Pde7a			Ccnb3
Ttc28	Hk2	Rnf24			Dock9
Bche	Rbp1	Sgk1			Gramd3
Gm16081	Azin2	Sox17
Cphx1	Rhob	Gstm1
D5Ertd615e	Malt1	Wnt5a
Tcf15	Tgif1	Plekha1
A930009A15Rik	Ppp1r15a	Itgb5
Emid1	0610043K17Rik	Dach1
Wfdc15b	Cadm1	Cers6
Clec1b	Map2k1	Map2k6
Timp3	Gm50012	Gcnt2
Sox5	Rgs3	Ccn1
Smim10l2a	Ifne	Fzd6
Wipf3	Lin54	Fzd10os
Gm14372	Gm56730	Ptpn22
Rnf223	Mvp	Pdcd4
Ppp1r36	Irak4	Stox2
Synpo2	Zmynd8	Myd88
Magix	Smpd1	Adgrl3
Dbx2	Crebl2	Zyx
Rims1	Stk10	Hif1a
Dipk1b	Gprc5a	Dapk1
Fbxl21	Gmnn	A4galt
Msi1	Smox	Ccnb3
Gm40578	Tor3a	Txnip
Gm35215	Efhd2	Tdrd3
Ifitm10	Elmo1	Cldn10
Lrrc17	Cfh	Lifr
Atoh8	Adgrg6	Ppp1r15a
Gm34068	Plekhm3	Zmpste24
Casq1	Sh3gl2	Slc23a1
Pla2g5	Manba	Ifitm1
Ikzf4	Pyroxd1	Ric1
Gm49427	Pcgf5	Dock9
Irak1bp1	Arhgef10l	Pdzk1ip1
Sox2ot	Ube2l6	Cmtm8
Gm34278	Rgl3	Slc6a6
Hopx	Nucb1	Dst
Ptgs1	Apol9b	Ngef
Lims2	Rdh10	Palld
Frem2	Alms1	Irf6
Samd14	Slc25a19	Tmem123
Pnliprp2	H2-Q4	Suco
Duxbl1	Prkch	Tmem158
Gja4	Nfkbia	Arhgap42
Slc25a48	Ncam1	Cyb5r3
Gm12249	Trim12c	Eda
Nckap5l	Sfrp1	Mpc2
Stard13	Samd12	Dusp1
Fbxo16	Atp6v0a1	Id2
Scx	Dtnb	Lima1
A930001A20Rik	Hook2	Bsdc1
Nudt10	Lrrc36	Gsta4
Sbspon	Ttc9	Pik3c2a
Thrsp	Efhb	Nudt4
ccdc198	Ppp2r3a	Rsph3b
Gm34267	Myo1d	Fxyd4
Serpinh1	Fbxo6	Nav2
Fkbp10	Spidr	Eif4enif1
Slc6a15	Slc9a9	Glul
Phlda2	Cd164	Pgr
Il20ra	Rhpn2	Lrpap1
Tbx2	Oas1g	Tnpo1
Zbtb16	Ugt1a7c	Adipor2
5730471H19Rik	Parp9	Gsto1
Greb1l	Tnfrsf1b	Chdh
Akap17b	Oas1a	Plxnb1
Gask1a	Rnd3	Gcnt3
Cfap70	Myof	Gstm2
Trp63	Amot	Sdc4
Hk1os	Skic2	Cbx6
Pvt1	Syk	Braf
Efhd1	Gm12185	Nbea
Ebf4	Cebpd	Fosb
Spsb4	Cfap43	Aldh7a1
Ccn2	Tmem51	Elovl5
Gstm1	Fbxo36	Mycbp2
Chrd	Fut9	Kctd1
A330040F15Rik	Grhl1
Rasgrp3	Paqr8
Hsd11b2	Zfp710
2700054A10Rik	Gbp6
Krt79	Efemp2
Fsip1	Cblc
Gm56862	Cpne2
Gm1043	Sorbs2
Dok7	Cd14
Klf12	Il4ra
Ccnd2	Adgre5
Hspa12b	Cpn1
Gja3	Ptpn13
Zfp651	Ifngr2
Gal3st1	Stc2
Gdap1l1	Fnbp1
Ddah2	Rin2
Abca4	Lonrf3
Kcnn3	Mapk13
C1ql1	0610040J01Rik
B4galnt4	Vps37b
Ccdc30	Acer3
Amdhd1	Slfn2
Krt36	Ly6e
Serpine2	Lpin2
Gm20757	Rnf213
2310081O03Rik	Uba7
Ifitm1	Hoxb5
Dram1	Cd44
Fgf16	Camk1d
Dmtn	Srxn1
Hydin	Map3k9
Col12a1	2610203C22Rik
Syde1	Dysf
Ppic	Endod1
Cspg5	Fam135a
P3h1	Cnnm2
S100a4	Stk25
Slc8a1	Adm
Nlgn1	Dleu2
Apba1	Sqstm1
Gask1b	Ier3
Emb	Rras
Cyb5r3	Mal2
Cox4i2	Fgd3
Gm16178	Cited2
Gm35585	Ehd1
Acss3	Iqgap2
Nrg4	Psd3
Col4a4	Plekha6
Ovgp1	Il18bp
Kctd8	Tmco4
Gm54310	Dok4
Actr3b	Gm7160
Efcab12	Sirpa
Nipsnap1	Bcl3
Dnajb3	Dtx3l
Cracd	Tcf7l2
Dab1	Gm49890
Mitf	Ift22
Caprin2	Slc2a1
Cyp2f2	Trim34a
Abhd14a	Lgals3bp
Tmem17	Megf9
Gm15326	Flnb
Clip4	Crlf3
Upk1a	Trim12a
Hspb8	Osbpl3
C230072F16Rik	Otud3
Peg3	Arhgef3
Pde1a	Arfgef3
Hdc	Vat1
Col4a3	Fam124a
Gm266	Lmo4
Egflam	Il13ra1
Enpp1	Ccl28
Entrep1	Papss2
D630045J12Rik	Nfkb1
Stk32b	H1f2
Enox1	Setbp1
Pinlyp	Il36b
Scara3	Tmem45b
Gm16793	Slc23a4
Ptn	Isg15
Klf8	Kdm3a
Axl	Adam28
Sult1d1	Tenm4
Kcnb2	Nr1d1
Ppp1r14c	Ksr1
Astn2	Plod1
Cmya5	Lgals9
Degs2	Gale
Podxl	Arhgef38
Chst10	Dnase1l1
Gcnt3	Narf
Acyp2	Cdkn1a
Dbndd2	Slc39a6
Cand2	Unc93b1
Golm2	Prxl2a
Gstm7	Slc27a2
Ccl27a	Efna1
Nkd2	Rhoq
E330013P04Rik	Arhgap26
C1qtnf9	Dusp10
Gm44167	Asxl3
Scd1	Ctsa
Rbms3	Cd47
Cybrd1	Glrx
Gm12735	Trp53i11
Mamld1	Slc37a1
Tspyl4	Eif4ebp1
Tnfrsf25	Camk2n1
Adcy3	Dhx58
Mzb1	Cttnbp2
Atp2b2	Ptprr
Stox2	Nexmif
Nme4	Cdh24
Ccdc136	Syt8
Ptgr1	Gtpbp2
Fam181b	Als2
Lgi2	Tnfaip8
AU021092	Sp140
Ivl	Cdc42ep3
Tuba1a	Gm45145
Gstm2	Malat1
Dmpk	Pde8a
Nrg1	Cda
Ankrd66	Gm47547
Tmem47	Nceh1
Fam228b	Tap2
Hnf1aos1	Celf2
Slc7a11	Gm14636
9130015G15Rik	0610040F04Rik
Kctd17	Grpel2
Hspb2	Osmr
Slc27a3	Tap1
Sgk1	Trim25
Morn4	Bach1
D7Ertd443e	Lpar1
Zfp57	Il18r1
Cth	Ly96
Shank2	Spink12
Krt15	Lrrc8b
Gjb3	Gm39770
Pcolce2	Dlx6os1
Hyal3	Sox7
Pabpc1l	Man1a
Fgf12	Dtna
Frmpd4	Pik3c2b
Macroh2a2	Robo2
Dync2li1	Irgm2
Fkbp5	Opn3
Gsn	Ovol1
Car8	Sphk1
St3gal2	Ahcyl2
Sox17	Wnt4
Smim6	Pxk
Fbxo27	Ikbke
Fbxw10	Optn
Scara5	Plch1
Mxra7	Leng1
Dab2	Snx25
Gjb6	Pi4k2b
Id2	Zbtb7c
S1pr2	Pde9a
Id3	Pld3
Rtl8b	Frmd6
Arnt2	Bach2
Slc39a14	Avil
Mb	Krt87
Etv5	Wdr47
Gm50323	Stx1a
1110002E22Rik	Tshz1
Gm40841	4930599N23Rik
Scn2b	Nucb2
Cux2	Rhof
Smim1	Micall2
Adamts10	Eps8
Fermt2	Mbp
Tmed6	Boc
Palld	Inpp5d
Pik3ap1	Pmaip1
H1f10	Serpinb5
Cacnb4	Pip4k2a
Ebpl	Rflnb
9630014M24Rik	Btbd8
Trpm3	Ccdc71l
Gm20052	Lars2
Rec8	Cd55
Syn2	Itgav
Kcnq5	Tram2
Ikzf1	Pdk1
Pkdcc	Fry
Cib2	Hpcal1
Ccdc60	Adgrl2
Hspb1	Chst8
Abi2	Fam174b
Stc1	Vegfa
Dnah7b	H2-Q2
Ccdc3	Lmo7
Adgrg2	Serpine1
Atp2a3	Fnip1
BC018473	Gm43305
Gramd2	Bcl2l11
Gm4316	Plet1
Gspt2	Card10
Wdr35	Btg1
Sult2b1	Pcsk6
Ctnnd2	Phf11d
Gm16638	Castor2
Lmtk3	Trim30a
Sorbs3	Chst7
Kcnt2	Cyp2j6
Plekhg5	Ada
Gm41386	Neat1
Cdkl1	Homer3
Ttc12	Nfkbiz
Aldh1a7	Rasgef1b
Cnn3	Add2
Cd200	Slc5a9
Pmp22	Ripk2
Ppp2r2b	Timp1
Abcc5	Trafd1
Nradd	Dusp4
3010001F23Rik	Gm45397
Eid1	Gm35439
E230013L22Rik	Ptprm
Pitpnm2	Micu1
Gm42439	Tmprss4
5033406O09Rik	Slc39a8
Slc46a1	Atxn1
Tns1	Gm30054
Wnt5a	Jak3
2310043M15Rik	Kcnk5
Eml1	H6pd
Dbn1	Plcl2
Flna	Ifit3
F8	B3gnt3
Dlgap1	Met
Castor1	Lemd1
Pcx	Alpk1
B230208H11Rik	Sdcbp2
Gm35333	Fndc3a
2310002F09Rik	Rasal2
Gamt	Gm15675
Trim47	Phactr1
Fjx1	Epas1
Ltbp4	Fam184b
9330154J02Rik	Nfkb2
Mybpc2	Mpzl3
Gm14317	Pof1b
Gkap1	P2ry6
Galm	Galc
Raver2	D17H6S56E-5
Zc4h2	Sqor
Enpp6	Padi2
Aldh7a1	Tanc2
Tex15	Zhx2
Nrp1	Zfand2a
Kcng3	Serping1
Gm13431	Socs2
Slc15a2	Fbxw17
Evc2	Gba
Amt	Sema6d
Cibar1	Pou6f1
Nrep	Rasal1
Lrguk	Or2v1
9230116N13Rik	Gm35019
1700001L05Rik	Taok3
Plekhd1os	Oasl2
Adora1	Gm39816
D630039A03Rik	Mx2
Myc	Gsto2
G6pc2	Tnfsf13os
Etv4	Nbl1
C030034L19Rik	E130102H24Rik
Klk10	Gm17189
Asrgl1	A330023F24Rik
Zfp41	Slc40a1
Fam118a	Tspan33
Cthrc1	Dennd2b
Hs3st3a1	Togaram2
Hk1	Ifit1
Pbld1	Bicdl1
Ccnd1	Fam3b
Serpinb7	Mxi1
Rilpl1	Plekhn1
Nr4a3	Gm12216
C9	C730002L08Rik
Gm16833	Nmnat3
Upk3b	Irf1
Klhl13	Muc20
Tceal8	Mab21l3
H60c	Rcsd1
Pcbd1	Niban1
Gm57151	Pim1
Slc22a5	Ypel2
Lurap1	Chp1
Anpep	Insyn1
Fgd1	Muc1
Calml3	Parp14
Cryab	Phf21b
Chpt1	Tmem154
Sccpdh	Gm10115
Jam2	Sprr1a
Coq8a	Plekhg1
Zfp711	Fbxo32
Gck	Ceacam1
Mpdz	Cobll1
Dnph1	Zdhhc15
Gstk1	Atosb
Phyhd1	Ecm1
Arg2	Gbp7
Lgals1	Iigp1
Spry4	Casp4
Rps6ka2	Nlrx1
Gm56688	Raph1
Id4	Gm20559
Fam149a	H2-T23
Gsdmc2	Gpr137b
Aldh1a1	Ahnak
Gm57399	Dennd2c
Pard3b	Trpm6
Cap2	St3gal1
Arhgdig	Parp8
Nuak1	Kcnc2
Ms4a8a	Pir
Apcdd1	Clip2
Ap3b2	Polk
Car11	5830408C22Rik
Ift57	Rapgef5
Rimkla	C2
Zhx3	Gbp4
4933406I18Rik	Cdc42ep2
Slc7a4	Mtss1
Dhcr7	Dock11
Spink8	Itga9
Rcl1	Apaf1
Sdk1	Tlr2
Gng10	Ccser1
Iqcb1	Stat2
Unc93a2	Cpm
Jag2	Abca1
Maoa	Gbp3
Tcaim	Slc2a6
L1cam	A530013C23Rik
Msx1	Mgat4a
Zfp37	Samd9l
Tspan3	Lif
Adamts17	Clic4
Cited4	Scamp5
Tnfsf12	Sh3bp2
Ces2g	Pcsk5
Nhsl2	Trim36
Gng11	Cacna2d3
Nxpe3	Atp10a
Tln2	Usp18
Rogdi	Lama3
Sycp3	Glipr1
Adamts6	Urah
Zfp184	Gm43445
Gm28417	Nabp1
Tesc	Noxa1
Rab20	P4ha1
Tgfbrap1	Entpd8
Eid2	Il34
A430046D13Rik	Cntnap3
Fam216a	Gabre
Lrfn4	Ddr2
Jakmip1	Akt3
Cfap53	Oas2
Klhdc2	Rab11fip5
Gm13056	Ugdh
Zfp296	Marchf3
Fam124b	Me1
Erc2	Epb41l2
Nudt19	9130230L23Rik
Tnfrsf19	Snx7
Ndufc2	Acp5
Gm49207	Tmprss11e
Cox6b2	Ier5
Mt2	Sgce
Cstpp1	Bend4
Gstp1	Il15
Polr2h	Srd5a1
Sla	Unc13a
Gm16576	Clec2d
BC048679	Homer2
Med24	Gm42047
Itpripl1	Trim10
Zfp40	Herc6
Zfyve9	Slc16a7
Id1	Mid2
Gcat	Tent5a
Pdgfrl	Tnfsf10
Cabcoco1	Cfp
Tmem108	Ifi44
Phgdh	Tnfsf9
Elapor1	Ncoa7
Adh5	Pfkp
Spry1	Cp
Mtr	Sytl3
4732490B19Rik	Stx11
Gm17173	Gm20186
Apip	Scel
Rangrf	Nlrc5
Tmem141	Capn5
Stat5a	Relb
Akr1c19	Tex49
Fitm2	Slc11a2
Pdk2	Ncmap
Zc3hav1l	Irf7
Ccdc189	Ntf3
Decr1	1810064F22Rik
Arhgef10	Cdkn2b
Zfp251	Gm15283
Foxred2	Pde4b
Scrn2	Kank3
Atp6v0d2	Dnase1l2
Psat1	Gm33699
Gulp1	Slfn8
Gm56494	B4galnt1
Snx22	Ntn1
Adgrl3	Chn2
Rdh11	Gm10855
Gm13986	Il6ra
Cfap300	Mycn
Frmd5	Trim15
Rab11fip4	Nlrc4
Fundc2	Fam3d
Gm56721	Apobec1
Hsbp1l1	Mctp2
Gper1	C2cd4a
Hspe1-rs1	Gm3336
Per2	Gm19696
Pcbp4	Cxcl16
Arhgap18	Cyp2s1
Crispld2	Plxnd1
Ncald	Cmpk2
Anxa9	Klf7
Tsc22d3	Sftpd
Fgf18	Sgsm1
Ankrd6	Tmem178
2810001G20Rik	Runx2
Iftap	Bard1
Prps2	Lrrc20
Fcsk	Ndrg1
Vkorc1	Ache
Tpbg	Meis2
Cox7a2l	Glipr2
Asb1	A630023A22Rik
Tcf7l1	Frmpd3
Ryr3	Gpat3
Tceal1	Sat1
Fpgs	Adgrg7
Idh2	Lyn
Zfp428	Ppm1j
Arl3	Nrp2
Flvcr2	Prkca
Dtd1	Ifit3b
Arhgdib	Pik3cg
Arhgef19	Upk3bl
Abhd14b	Apol9a
Chsy1	Zc3h12a
Actn1	Gm43042
Gpt2	Klf2
Adat2	Igfbp7
Fn1	Fam83e
Dnajc18	Tgfb1
Ptk2b	Ctse
Zfp512b	Mlkl
Gm17546	Vldlr
Gm20703	Trim30d
Tmem254	Melk
Sdsl	Mx1
Lrpap1	Zdhhc14
Ydjc	Naip1
Prr5l	Arhgap28
Bmp1	Fam83f
Cd200l1	Gm43057
Rbm24	Csgalnact1
Srd5a2	Cfi
Hps3	Dkkl1
9230105E05Rik	Col6a3
Smyd5	Hrh1
Ctsf	Ly6c1
Plac9	Stxbp1
Sys1	Cd74
Trmt61a	Ddx60
Npm3	Gja1
2210408F21Rik	Ahnak2
Tppp3	Slc16a1
Zmpste24	Bok
Ppp1r26	Aqp4
Gm21814	Serpina1e
Tef	Gm20442
Pkhd1	Slfn10-ps
Gm48094	Sorcs2
Tmem229b	Oas3
Snrpn	Aebp1
Cfap36	Prickle2
Vsig10l	Kalrn
Krt80	Ltbp1
Irs1	Wdr72
Polr3h	Trp53inp2
Maged1	Golm1
A430018G15Rik	Stk32a
Lypd2	Tpm2
Dclk3	Slc41a2
Zfp599	Gk
Fbxl7	Ctss
Cldn10	Eepd1
Jpx	Oasl1
Tgif2	Steap1
P4htm	Tgm2
Cdkn1c	Apobec2
Krt17	Prkg1
Cdh4	Lcn2
Gm42595	Birc3
Hgh1	Trim6
Socs7	Krt23
Slc29a2	Il18rap
Nes	Steap2
Ccdc146	Pcbp3
Snx8	Zbp1
Grwd1	Wnt16
Nmral1	Gm14137
Pgrmc1	Abcb1a
Zfp940	Xdh
Gsta4	Nlgn2
Pgr	Lrrc55os
Acss1	Tspan12
Efemp1	Anxa8
Dnaja1	Ptgs2
Greb1	Cd68
Cndp2	Jaml
Flot2	Epb41l3
Cbx6	Gm30806
Ippk	Omp
Gm49417	Tlr5
Ppargc1a	Plekhg6
Slc6a6	Hgfac
Tmem42	Alpl
Ift27	Clic6
Dzip1	Icam1
Sybu	Fam13a
Mcrip2	Fcgbp
Cat	Il4i1
Hadh	Gvin1
Snhg4	Gfra1
Mapre3	Ak4
Fah	Hpse
Tmem237	Pik3r5
Eif2ak4	Flrt3
Rassf9	Ero1a
Eef1akmt2	Itga2
Zfp467	4930405N21Rik
Impdh2	Xylt1
As3mt	Gch1
S100a1	Glrp1
Rrp12	Smpd3
Bhlhb9	Gm32219
Trmt112	C130074G19Rik
Gm34643	C2cd4b
1810014B01Rik	Gm13067
Tmed1	Col5a2
Spata24	Abcg1
4930433N12Rik	Cavin3
1500012K07Rik	Creb5
Sox11	Muc4
Zhx1	Csf1
Arvcf	Itgb8
Kctd12	Pcdh17
Nde1	Mkrn2os
Chdh	Nfkbie
Mcm2	Wfdc16
Prag1	Slc26a1
Tmem123	Lrrc8c
Neb	Gm17171
Nit2	Ly6a
Dkc1	Plpp1
Dst	Tmem140
Hmgn3	Sectm1b
Glrx5	Gm50046
Wdr31	Ptpre
Ggnbp1	Gm13398
Camkk1	Sprr2f
4933424G05Rik	Gm39556
Tsr2	Serpina9
Paics	Lypd8l
Frmd4a	Kcnk6
Tspan13	Mcub
Tmem44	Rnf183
Tulp3	Rab7b
Prodh	Pcp4l1
Pdf	Krt6b
Tacc1	Slc5a1
Usp2	Fzd7
Hmgn1	Mak
Tprkb	Hcar2
Dlg4	Plcxd3
Lipt1	Eeig2
Prrg1	C430049B03Rik
Zfp882	Gm8439
Gm56714	A530040E14Rik
Rnf24	Gm16754
ENSMUSG00000121477	Krt25
Sfi1	Atp13a4
Srm	Gabrp
Gas5	Prom1
Aspa	Rgs10
Tmem191	Ccdc88b
Tagap	A530032D15Rik
Gclc	Il17rd
Ndufaf6	Bnip3
Gm37587	Ifi204
Tst	Apol7a
Dgkh	Lvrn
Slc25a23	Cyp21a1
1500011B03Rik	Fer1l4
Snhg10	Ttyh2
Pdzd4	A330032P22Rik
Gm32960	Nupr1
Pgap4	Ankrd37
Hspg2	Clca1
Cry2	Tnfaip2
Plxnb1	Erich3
Rab15	Gm47754
2010204K13Rik	Zfp423
Akr1e1	Gda
Zfp72	Stom
Gcnt2	Trib2
A130010J15Rik	Igsf9b
Hmgn2-ps	H2-K2
Gm29538	Pparg
Cisd3	Gbp2
Gm9895	Tmprss11d
Hnrnpll	Gna14
Fkbp3	Abcb1b
Gm16136	Gm42716
Gm30414	Rsad2
Hsd17b10	Galnt6
Lgr5	Cxcl1
Mphosph8	Cfb
Ptges3l	Pik3cd
Zdhhc1	Egln3
Dctd	Ptprh
Ifitm2	Wfdc8
Wdr46	Prdm1
Maged2	B3galt5
Gm5148	Chst15
Rusc1	Slc4a4
Ksr2	Apobr
Ddah1	Ltf
Tmem218	Slc34a2
Arl2bp	Slfn5
Dnajc28	Padi3
Ifitm3	Clic5
Myd88	Foxq1
Fads2b	Irag2
Nt5c3b	Trim7
Ppat	Selplg
Pck1	Tmprss11g
Cmtm7	Mxd1
Panct2	Slc26a9
Gabbr1	Slco4a1
Slc50a1	Trpv6
Arl4c	Ifi211
Iah1	Gvin2
Cdc14b	Noxo1
Otulinl	Tnfrsf23
Ctf1	Ifi203
Stim1	Pigr
Gm56577	BC016579
Auts2	Tnfaip3
Arhgap42	Slc16a14
Prmt1	Scin
2410006H16Rik	Tnf
Lysmd2	Cxcl5
Magohb	Gm15848
Ntm	C3
Rhod	Itgam
Rpp38	Srgn
Ptger2	Trpv5
Kti12	Ifi202b
Bex3	Gm10701
Krba1	Cxcl2
Ppp3cc	Tmprss11b
Mthfd1	Rnf186
Atic	AA467197
Siva1	Ctsl
Dse	Nell2
Extl2	Prkar2b
Gga2	Adam8
Kantr	Sytl2
Alkbh8	Sntb2
Nav2	Zfp469
Tfcp2l1	Nav3
Cyb5b	Atg9b
Tbc1d16	Ltc4s
Wdr77	Nod2
Ap1s3	Slit2
Hspe1	Sprr2a3
Gucy1a2	Pglyrp1
S100a6	Prss32
Slc52a2	Inhbb
Phpt1	Hsd17b2
Tle2	Pla2g2e
Heatr3	Il1a
Clcn5	Depp1
Parp1	Olfm1
Skida1	Adamts1
Zfp459	Trim40
Fbl	Kel
Gpc6	Sprr2b
Dtymk	Flt1
Sardh	Muc13
Mars2	Slc16a3
Fsd1l	Cfap69
Jazf1	Qsox1
Gm42941	Gm38509
Timm10	Gm1965
Snhg12	Capn8
Gpm6b	Mndal
Bace1	Anxa10
Galnt18	Plac8
Gpatch4	Uox
Ipo4	Rasa4
Rpl3	C130026I21Rik
Zfp937	Cited1
Pcolce	Gm15657
Nudt14	Irx3
Gm35572	Elfn1
2310061I04Rik	Aoc1
Ifrd2	Rerg
Plekhs1	Tnfrsf11b
E2f6	Scnn1b
Lage3	Adgrf1
Glo1	Ntrk2
Cebpzos	Wfdc18
Marcksl1	Gm15987
Tnfrsf21	Ltbp2
Akr1c13	Syt16
Apex1	Spp1
Large2	Il36g
Fam131c	Slc26a4
Stard5	Gm26756
Ankrd46	Itpripl2
Aasdhppt	Marchf4
Mettl26	Il36a
Poc5	Arg1
Gm26705	Mmp7
1810034E14Rik	Peg10
Grb10	Chil1
Agpat4	Pcdh19
Gm36723	Krt20
Fkbp4	Sprr2d
Rrp8	Ifi207
Surf2	Tnip3
Mapk12	Ifit1bl1
Cad	Prap1
Pmvk	Slc5a8
Msrb2	Lrg1
Bysl	Clca3a1
Rab39	Clca3a2
Sdr39u1	Clca3b
Aarsd1
Uqcc6
Psen2
Far1os
Rrp9
Bicd1
Glb1l
Tmem8b
Psmg2
Ucp2
Mpc2
Fam229b
Psmd3
Hspd1
Nutf2-ps1
Mrpl41
2510002D24Rik
Ccdc28b
Tfap4
Cenpx
Tbc1d8
Sfxn2
Ica1
Rpl12
Ndufaf4
Zfp763
Slc44a3
Gfod1
Klhl29
Evl
Fgfr2
Trim24
Bphl
Pigh
1700037H04Rik
Per1
Irf6
Rps3a1
Zfp709
Gm43376
Hsd17b8
Atp2b4
Mppe1
Xrcc5
Pde7a
Rrp15
S100pbp
Afap1l1
Bag5
Mtss2
Gpam
Trerf1
Elovl5
Bckdhb
Erlin1
Slc7a1
9030404E10Rik
Wdr6
Gm5141
Hmbs
Gm16093
Impdh1
Med7
Rbbp9
Mxd4
Nip7
Fra10ac1
Gm16124
Rida
Gatd3a
Calcrl
Snhg8
Psmg1
Snhg15
Ctsd
Shmt1
Selenoh
Eif3i
Wdr83os
Fzd6
Exosc2
Nol6
Man2a2
Gm15738
Ap4s1
Gm14305
Sun2
Pdp2
Mccc2
Nop16
Platr25
Spef1
Bcat2
Nifk
Rdh13
Zfp267
Arsg
Fkbp9
Dusp7
Mrto4
Trub1
Ska2
Haus8
Cln5
Acyp1
Btbd19
Tmem223
Crip2
Hmgn2
Mid1ip1
Pycrl
Pwp2
Pus7l
Wdr43
Cdk4
Sema6a
Dbt
Rtl8a
Dnajc12
Gm15417
Eif4enif1
Parva
Gm42937
Polr1e
Pllp
Ccdc88c
Tspyl2
Cep78
Gm46563
Mrm3
Phyh
Adgrg1
Pusl1
Arhgef26
C1qbp
Tfdp2
Fam219b
Cracr2b
Dhodh
Hsd11b1
Osbpl6
Kctd14
Mettl1
Pccb
Gm31683
Praf2
Hnmt
Rassf5
Zfp593
Psip1
Kazn
Cks1b
L2hgdh
Prnp
Ildr1
Ermard
Lifr
Gm15270
Nin
Pdk3
Stra6
Pctp
Bcl7c
Smim11
Blvra
S100a13
Sdc4
Rtca
Echdc2
Mtmr4
Plcl1
Nherf2
Map9
Entpd6
Ssx2ip
Fzd2
B4galt4
Eif2b3
Glce
Ccdc102a
Zfp820
Bloc1s1
Fastkd1
Cd79b
Hddc3
Rpp40
Slc25a32
Nop10
Lancl1
Gart
Repin1
Fbxo22
Ctps
Tkt
Pus7
Katnal1
Ahsa1
Vmac
Ccdc125
Gm10131
Cmc4
Smarca2
Timm8a1
Tpd52l1
Nme1
Pex10
Kitl
Rps4x
D030028A08Rik
Bmp2k
Mrps26
Klhl42
Map2k3os
Mdn1
Tm4sf1
Osgep
Rpl36a
Pomgnt1
Lix1
Thumpd1
Gm35853
Rpl39
Ulk4
Mcrip1
2700038G22Rik
5730522E02Rik
Ercc8
Laptm5
Agpat5
Rpl10a
Fmo2
Klf9
Nckap5
Shld2
Polr2e
Fut4
Zbtb25
Hs3st3b1
Qtrt2
Platr16
Cyb5r1
Pfn2
Sdhaf4
Pdss1
Rps13
Erh
Slc35a1
Faap20
Trp53rkb
Fntb
Hacd3
Macrod2
Radx
Prkar1b
Dach1
Septin6
Nr6a1os
Exosc3
Arl6
Six4
Grip1os3
Rps21
Stmn1
Prob1
Nop58
Gata2
Schip1
Cryl1
Rps9
Nudt16l1
Nob1
Dach2
Gm11973
Dut
Hap1
Znhit6
Hdac11
Cuedc2
Nup93
Elovl6
Sptssa
Ap3m2
Cers3
Ftsj1
Ilf2
Aen
Etfb
Rpsa
Rasd1
Sf3b4
Zdhhc3
Kyat3
Rps15a
Ddx51
Dnajc27
Smyd2
Srp14
Ccnjl
Stx18
Phb
Gm14403
Pebp1
Cklf
Gm15446
Slc25a4
Arl16
Ube2cbp
Golt1a
Mrps18a
Cdr2
Zfp202
Fdx2
Shisa4
Ybx1
Vwa8
Rpl15
Cisd1
Cers2
Exosc7
Prmt6
Lsm14b
Cd320
Utp25
Polr2g
Prdx6
Ruvbl1
Tmem62
Naa10
Gemin8
Chmp6
Gm17106
Nt5c
Ncl
Imp3
Pex11a
Pacsin3
Hddc2
Usp46
Tpm1
Aprt
Cct6a
Rps18
Tmem120a
Gm4117
Mrpl57
Dancr
Rgs2
Zcchc3
Rab26os
Arl14
Tsen2
Gpn1
Dbp
Eef1akmt1
Zfp623
Camk1
Adipor2
Slc19a1
Lcp1
Idh3a
Lyar
Rps10
Rcbtb2
Cd59b
Bsn
Poglut2
Mrpl4
Ssna1
Nqo1
Smim27
Wfdc2
Comtd1
Scoc
Jagn1
Vps28
Ltv1
Cachd1
Cptp
Cd63
Hif1a
Rnf7
Polr2l
Wdr12
Snrpf
Sdad1
Slc22a17
Glul
Pkig
Paqr3
Eif1b
Abhd12
Dclre1b
Slc16a6
Rad51b
Gm57402
Thra
Atl1
Tnpo1
Ipo13
Guk1
Tcte2
Slc18b1
Wdr55
Lrrc58
Zfp961
Rplp1
Hsp90ab1
Hilpda
Rps7
Gm12592
Nenf
Rpl17
Fam136a
Gm36220
Phf2os1
Nr2c2ap
Sco2
Lsm5
Dtd2
Pop5
Rtl5
Arl2
Golim4
Noa1
Phb2
Mybbp1a
Rps26
Nbdy
Sned1
Fam185a
Limch1
Tspan9
Cnbp
Unc13d
Rps5
Zfp74
Haus1
Dcaf4
Tle5
Tmem198b
Chchd4
Trmt5
Mrpl40
Ccdc115
Ppcs
Gm26901
Ebna1bp2
Emp2
Prr5
Pno1
Trmt9b
Prr15
Xxylt1
Pqlc3
Sytl5
Slc25a16
E130311K13Rik
Slc25a39
Mvb12b
Mtx3
Dnmt3b
Slc10a3
Pa2g4
Zfp947
Med30
Tob2
Kctd1
Galnt17
Dis3
Zfas1
Nf2
Fggy
Mpg
Yif1b
Cd59a
Atp5md
Znhit2
Cct5
Tmem125
Tfam
1110065P20Rik
Msantd3
Naxd
Gemin5
Gnpnat1
Fzd10
Grcc10
Rpf2
Oaz1
Tada2a
Cpeb1
Rpl7a
Nbea
Pelo
Il17re
Exosc1
Slc25a11
Itgb5
Snu13
Rps2
Pop1
Gm14207
Rps8
Sdc2
Pdcd2
Park7
Mettl18
Wdr74
Setx
Nudcd2
Mycl
Rmdn2
Elac2
Pik3r1
Ecsit
Lsm7
S100g
Stip1
Rnaseh2b
Orai3
Aldh2
Prps1l3
BC029722
Nudt4
Dph7
Tmem70
Cars2
Imp4
Dcbld1
Rpl30
Usp36
Dpm3
Rpl8
Pold2
Dnah8
Timm17b
Rps27a
Lsm2
Ifi30
Rrs1
Mak16
Cul9
Ss18l2
Rpl21
Polr2d
Ndufb8
Tmem251
Ahsa2
Czib
Ftsj3
Lsm1
Msto1
Mtln
Slc25a5
Rps25
Nhp2
Nup210
Zfp704
Rpl11
Sox13
Nol9
Psmd6
Cenpv
Mfsd8
Etfrf1
Snrpg
Gm20707
Rps27
Rin1
Mrps14
E2f3
Gm11944
Adsl
Zfp566
Snhg14
Cbr1
Nrtn
Porcn
Trmt61b
Pitpnm3
Fndc4
Hebp1
Pim3
Zmynd19
Nle1
Patz1
Trdmt1
Fbxo21
Acaa2
Wdr59
3110082I17Rik
Tsr1
Npm1
Zdhhc23
Eif3m
Trmt10c
Mycbp
Rcn2
Prkacb
Mllt6
Snrpd3
Acy1
Ttbk2
Tomm40
Endog
Tomm20
Ntpcr
Calml4
Ganc
Rpl14
Zfp322a
Fbxo25
Eef1a1
Fam53a
Hypk
Dus1l
Acat1
Ptpn1
Slc16a13
Bccip
Ube2q2
Hnrnpa1
Snhg5
Psmg3
Mtfr1l
Dnaaf2
Nop2
Eef1e1
Snrpe
Dctpp1
4933439K11Rik
Nsun5
Eva1c
9030025P20Rik
Vegfb
Cdk2ap1
Rad1
Cirbp
Snrpc
Smim26
Polr1b
Ndufb11
Nop56
Ran
Tyms
Tomm5
Dpy19l3
Sgf29
Usp11
Ppia
Rpl23
Stard7
Rpl32
Prcp
Zfp629
Rraga
Mcm4
Tbpl1
Lrrcc1
Urb1
Zfp618
Dph2
Ppid
Dpy30
Znrd2
Mtrfr
Mecr
2900005J15Rik
Rtraf
Surf6
Gm10130
Pin1
Tspan4
Zfp97
Triap1
Stxbp4
Nxn
Nt5dc3
Mphosph10
Tmem126a
Pecr
Trnau1ap
Usp39
Prr3
Slc1a1
Tmx2
Strap
Nup43
Zfp472
Set
Mid1
Hint1
Naaa
Hdac1
Suco
Cxcl14
Snrpa
Naf1
Ints13
Paxx
Gltp
Dmac1
Fancm
Gtf2a2
Rack1
Rbm3
Rhobtb3
Ccs
Mrpl16
Cdpf1
Alyref
Mta1
Osgin2
Med31
Cnih1
Map1s
Mycbp2
1600010M07Rik
B9d1
Apmap
Ranbp1
Telo2
Cby1
Rab4a
Rpl5
Ston1
Ndufb5
Atp5g2
Phf5a
Spout1
Thumpd2
Sptbn2
Rsl24d1
Fzd3
Nr4a1
Stat5b
Gnb1l
Ubr1
Ppan
Miga1
Rexo2
Tuba1b
Tsen34
Stoml2
Iqce
Tsfm
Bop1
Mrpl11
Pgam5
Zfp955a
Tpra1
Farp2
Rwdd3
Lratd1
Sod1
Acsl5
Ttc27
Lzic
Nfu1
St13
Ddx27
Lpar3
Impa1
G6pc3
Rps17
Nolc1
Glrx3
Zbtb1
Spata6l
Snx17
Hemk1
Rps16
A730017L22Rik
Ddx18
Pxmp4
Qtrt1
Galnt11
Gpr89
Gtf2i
Rpl29
Hyi
Tpst2
Cetn3
Cacybp
Zbtb41
Pigt
Ap1m1
Cbarp
Hltf
Ears2
Rpl34
Ddx21
Ubl4a
Rnf125
Dynlt2a2
1700029J07Rik
Wdr89
Ptms
AA465934
Mospd1
Ppih
Tcp1
Dph5
Rpusd2
Fam117a
Agk
Cystm1
Rwdd4a
Hras
Heatr1
Timm9
Mcm6
Sort1
Ptcd2
Borcs5
Lsm4
Pfdn2
Kpna2
Emc8
Clns1a
Smim13
Dnajc15
Prex1
Gmps
Eif3k
Mrpl12
Pgap2
Thg1l
Tfb2m
Rce1
Fkbp1a
Tmem41a
Ndufa8
Slc52a3
Emx2
Polr3g
Cluh
Cmbl
1110038B12Rik
Snrpb
Pabpc4
Vdac3
Ccdc66
Nfic
Rtcb
Slc25a12
Trappc1
Tmem158
Ptov1
Ak3
Cyfip2
Itm2c
Exosc5
Pigf
Dtwd2
Tefm
ENSMUSG00000121596
Cetn2
Sf3b6
Eci1
Zfp275
Pja1
Dicer1
Slc25a15
Dnajc4
Rplp2
Rab5if
Hdac2
Phax
Mettl16
Ndufb6
Pam16
Nme2
Fdx1
Mthfd1l
Mrps23
Isyna1
Gemin7
Mcm3
Slc35f3
Dhx29
Ccdc86
Iqsec1
Pank1
Noc4l
Mical2
Zscan22
B3galt6
Pnkd
Pgpep1
Mrpl50
Gtpbp4
Srgap3
Gm50240
Ccnb3
Ndufb10
Mrpl23
Dock9
Pygb
Zfp959
Spcs1
Zkscan8
Prpf31
Pms2
Nol10
Cul7
Yrdc
Gm48742
Commd6
Fam174a
Cdc23
Itpa
Snrpd1
Micos10
Atp13a2
C87436
Pigbos1
Coq4
Polr3d
Rabep1
Pip5k1b
Txn2
Arl14ep
Tceal9
Coa8
Dtx3
Timm22
Hyal1
Btf3
Pms1
Gnl3
Sirt5
Sumf2
Spring1
Gpx2
Hebp2
Lyrm4
Rae1
Ablim2
AI506816
Pprc1
Ankrd26
2610528J11Rik
Ywhab
Maz
Ssrp1
Azin1
N6amt1
Epha4
Dnlz
Pold1
Bcs1l
Pole3
Rps6
Eif3e
2310039H08Rik
Eef1b2
Wdr75
Mrps12
Mri1
Riox1
Gramd3
Prdm11
Rpl18
Lpcat1
Fahd2a
Tsen15
Cyp4v3
Fbxl14
Lyrm2
Cops7b
Dynlt3
Atp5g1
Hsp90aa1
3110009E18Rik
Cpox
Guf1
Gnl2
Syde2
Thap7
Rpl35a
Sprtn
Exog
Psmd12
Rapgef3
Ugp2
6430590A07Rik
[truncated: 1 more rows]

## Sheet: Estrus_cluster.5.7.13.16.21
	p_val	avg_log2FC	pct.1	pct.2	p_val_adj
Pbk	4.92642780121635e-175	7.41828	0.222	0.003	1.19874767686997e-170
Cep55	3.60543820147652e-167	6.66542	0.227	0.005	8.77311277565282e-163
Kif4	1.33955694877824e-158	6.12022	0.241	0.009	3.25954392346208e-154
Bub1	9.6347632411992e-153	6.15063	0.214	0.005	2.344426939481e-148
Shcbp1	4.08577499372738e-152	7.02194	0.191	0.002	9.94191629223683e-148
Ccna2	2.73407812671857e-150	6.62337	0.206	0.005	6.65283230574429e-146
Knl1	9.26864044783498e-150	5.8762	0.252	0.012	2.25533828017169e-145
Racgap1	3.5406294370295e-144	5.72368	0.249	0.013	8.61541360912389e-140
Kntc1	3.68722235611736e-144	6.50585	0.195	0.004	8.97211815914037e-140
Pclaf	4.46351741690528e-141	5.54277	0.314	0.03	1.08610769305556e-136
Birc5	8.94223681109084e-140	6.03164	0.239	0.012	2.17591448324273e-135
Bub1b	3.85473748253411e-137	5.42529	0.233	0.012	9.37973271625025e-133
Cdk1	1.17306311564837e-136	4.91618	0.285	0.023	2.85441447930719e-132
Rad51	3.04308813192031e-131	4.57866	0.241	0.015	7.40474635140169e-127
Tpx2	6.45877711636151e-131	5.55122	0.277	0.023	1.57161423572425e-126
Hmmr	1.32504835412172e-130	5.9004	0.187	0.005	3.22424016008439e-126
Dlgap5	3.4480292023928e-130	5.10739	0.237	0.014	8.39008945818241e-126
Aspm	1.68312717392479e-127	6.15493	0.198	0.007	4.09555335231118e-123
Pole	3.40646046302431e-126	5.0708	0.222	0.012	8.28894024467704e-122
Plk1	1.2909532604637e-124	6.1606	0.177	0.005	3.14127656868633e-120
Cdc45	3.46036667091806e-120	5.62511	0.183	0.006	8.42011022034491e-116
Ticrr	4.73548104163785e-118	5.17036	0.166	0.004	1.15228460186174e-113
Ccnb1	7.20937853721192e-115	6.09773	0.162	0.004	1.75425807945978e-110
Ttk	2.76674568693842e-113	5.91656	0.152	0.003	6.73232228002727e-109
Cdc20	3.66905772707124e-112	5.91464	0.191	0.01	8.92791816728245e-108
Cenpf	4.58735001699706e-112	5.00921	0.237	0.019	1.1162398796359e-107
Esco2	3.03505049521286e-111	7.76713	0.133	0.001	7.38518837000146e-107
Asf1b	4.44865796928858e-109	5.30672	0.168	0.006	1.08249194366699e-104
Polq	5.51020762913642e-109	5.54778	0.168	0.006	1.34079882239777e-104
Tk1	3.78101275875635e-108	5.13636	0.202	0.013	9.20033834588184e-104
Clspn	4.68608086960795e-108	5.42966	0.189	0.01	1.1402640580017e-103
Rad54b	6.14808833522594e-106	4.87056	0.177	0.008	1.49601433461053e-101
Rrm2	1.83213759924964e-104	5.19243	0.216	0.017	4.45814042025415e-100
Ckap2	3.15786987001103e-104	4.91866	0.179	0.009	7.68404475469785e-100
Kif2c	8.04450324528612e-104	7.00092	0.133	0.002	1.95746897467547e-99
Kif14	8.47342641880075e-104	6.79712	0.133	0.002	2.06183885048679e-99
Fignl1	1.18853233767234e-103	4.05107	0.208	0.015	2.8920557372581e-99
Ect2	1.79154642375448e-102	4.3037	0.268	0.032	4.35936991292178e-98
Ncapg	5.67177101776918e-102	4.62601	0.22	0.019	1.38011204175378e-97
E2f7	9.26386336348577e-102	5.94583	0.129	0.002	2.25417587223699e-97
Zwilch	8.10126646187614e-100	3.99037	0.245	0.026	1.97128116816832e-95
Cenpk	2.77092398369947e-99	3.73011	0.237	0.024	6.74248932953593e-95
Iqgap3	1.80670028841485e-98	6.26115	0.131	0.002	4.39624381179986e-94
Nuf2	1.85771801150896e-98	5.55858	0.143	0.004	4.52038523740475e-94
Depdc1a	5.47479560612378e-98	5.23581	0.148	0.005	1.3321820148381e-93
Kif15	7.61509708896921e-98	4.46991	0.281	0.038	1.85298157465888e-93
Mcm5	1.46061073336302e-97	3.80641	0.274	0.036	3.55410409749224e-93
Kif11	4.3067191834469e-97	5.2662	0.216	0.019	1.04795397890813e-92
Ndc80	1.04993792955822e-96	4.05282	0.204	0.016	2.55481396399402e-92
Neil3	2.19423241627729e-96	7.52252	0.123	0.002	5.33922573852754e-92
Rad51ap1	3.38060303697258e-95	5.37928	0.152	0.006	8.22602136986539e-91
Exo1	2.47827756433485e-94	4.52313	0.195	0.015	6.03039279729598e-90
Cdca3	2.91073687704343e-92	4.703	0.21	0.02	7.08269604290979e-88
Fam111a	4.55061356268367e-92	4.29719	0.243	0.029	1.10730079820782e-87
Nusap1	1.30125149236254e-91	6.25419	0.152	0.007	3.16633525636578e-87
Cenpm	5.3418460086971e-90	4.28964	0.173	0.011	1.29983138929626e-85
Spag5	6.10812307184978e-90	4.77453	0.156	0.008	1.48628958707321e-85
Spc24	8.84903887709997e-90	3.96901	0.272	0.04	2.15323662996474e-85
E2f1	1.61881704293133e-88	4.92193	0.15	0.007	3.9390675105648e-84
Mki67	7.46568840549711e-88	5.2268	0.291	0.049	1.81662595970961e-83
Dscc1	1.67493777182375e-85	4.28092	0.148	0.007	4.07562608017874e-81
Kif20a	8.15225123086277e-84	4.50212	0.168	0.012	1.98368729200584e-79
Sgo1	9.54153390773912e-84	5.31023	0.143	0.007	2.32174144577016e-79
Cenph	4.50624404082523e-83	4.01159	0.218	0.025	1.096504362454e-78
Uhrf1	1.04644912630308e-82	3.87757	0.366	0.086	2.54632465903328e-78
Prim1	7.79348028040218e-81	3.71463	0.268	0.043	1.89638755663026e-76
Dtl	2.05025993552592e-80	4.10276	0.272	0.046	4.98889750111521e-76
Ncaph	5.33366173857911e-79	3.66899	0.222	0.028	1.29783991084846e-74
Rad54l	2.69675281993983e-78	4.14422	0.191	0.02	6.56200863675958e-74
Ska1	6.22446135993627e-78	6.30722	0.102	0.002	1.51459818271329e-73
E2f8	1.3329751853709e-76	4.30508	0.191	0.02	3.24352851856302e-72
Brca1	2.28536753638016e-76	4.42513	0.21	0.026	5.56098482627384e-72
Prr11	3.98152901026982e-76	6.21306	0.091	0.001	9.68825454068956e-72
Fanca	1.04189581081093e-75	3.19904	0.245	0.037	2.53524507644623e-71
Cenpi	2.32152732687253e-75	4.04686	0.135	0.007	5.64897244447892e-71
Kif22	1.32752533098768e-73	4.30844	0.166	0.015	3.23026738789232e-69
Tacc3	2.60215883206805e-73	3.44644	0.268	0.048	6.33183308607118e-69
Aurkb	2.93087679209722e-73	6.26481	0.102	0.002	7.13170249821016e-69
Ercc6l	4.03101132888476e-73	4.1336	0.143	0.01	9.8086598665753e-69
Ube2c	1.6538523630749e-72	4.25369	0.287	0.058	4.02431895507015e-68
Dhfr	5.0129535942007e-72	3.85735	0.22	0.031	1.21980199807686e-67
Kifc1	3.74558516604701e-71	4.62873	0.114	0.005	9.1141323845422e-67
Chaf1a	5.69469005981635e-71	3.36261	0.264	0.048	1.38568893225511e-66
Rad18	2.30976843265231e-70	3.44011	0.237	0.038	5.62035952717286e-66
Mcm10	5.1819832794751e-70	3.88857	0.193	0.024	1.26093199139468e-65
Cit	5.80475991285651e-70	3.77595	0.212	0.03	1.41247222959537e-65
Efcab11	1.79351757836059e-69	4.1115	0.129	0.008	4.36416632342482e-65
Cenpp	2.00442425810646e-69	3.76384	0.26	0.048	4.87736554725044e-65
Chek1	1.88732098775627e-68	3.40588	0.198	0.026	4.59241815950734e-64
H1f5	5.47237808649298e-68	5.89871	0.185	0.022	1.33159375978634e-63
Tcf19	9.11395789169006e-67	4.67904	0.119	0.006	2.21769937378494e-62
Nek2	1.50945526400388e-66	3.90734	0.143	0.012	3.67295749390064e-62
Cenpw	3.18796774021716e-66	3.41994	0.233	0.04	7.75728190227042e-62
Mns1	9.73632834024403e-65	4.9101	0.096	0.003	2.36914077503158e-60
Dut	9.24100732023774e-64	3.17978	0.422	0.15	2.24861431123345e-59
Itgav	9.55587025710022e-64	-1.46007	0.655	0.94	2.3252299096602e-59
Rmi2	1.05690573916069e-62	3.51176	0.158	0.017	2.57176873509971e-58
Cfb	1.54562887792978e-62	-0.935326	0.68	0.922	3.76097874866653e-58
Top2a	2.03727645267774e-62	4.77664	0.358	0.109	4.95730479230075e-58
Klf7	2.29948996303041e-62	-0.867467	0.418	0.822	5.5953489270419e-58
Trpm6	4.05211078138896e-62	-0.828004	0.574	0.909	9.86000116435377e-58
Traip	5.46521509209265e-62	4.40478	0.123	0.008	1.3298507883589e-57
Wdhd1	2.51049706219821e-61	3.25616	0.247	0.048	6.1087925014469e-57
Casp4	5.49236712597912e-61	-1.00216	0.314	0.735	1.3364576927645e-56
Pla2g2e	1.11654380841013e-60	-0.967285	0.16	0.613	2.71688604900436e-56
Arhgef3	1.52175802285364e-60	-0.913624	0.495	0.855	3.70289379700976e-56
Cfi	2.82181213206299e-60	-0.943585	0.38	0.77	6.86631546094888e-56
Trip13	3.32584965994515e-60	2.83642	0.233	0.043	8.09278997754453e-56
Ccne2	6.16115196273318e-60	3.66666	0.183	0.026	1.49919310709186e-55
Cip2a	7.40230297587707e-60	3.23894	0.193	0.029	1.80120238312017e-55
Cfap69	9.47615793955302e-60	-0.991953	0.266	0.72	2.30583351143144e-55
St3gal1	9.56625502291187e-60	-0.902739	0.364	0.775	2.32775683472515e-55
Pimreg	9.62456658909256e-60	5.85627	0.071	0	2.34194578812389e-55
Ccnb2	1.12839726994851e-59	3.88939	0.204	0.034	2.74572907696572e-55
Eldr	1.55391863720647e-59	4.79592	0.089	0.003	3.7811502199145e-55
Cxcl16	1.88941663247797e-59	-1.27371	0.191	0.607	4.59751749180865e-55
Blm	1.95252489964936e-59	2.89279	0.227	0.041	4.75107883831678e-55
Birc3	2.69756395413671e-59	-1.00325	0.335	0.725	6.56398236960087e-55
Cdkn3	1.15155452912755e-58	4.54525	0.108	0.006	2.80207763572606e-54
Inhbb	4.38781393251114e-58	-1.13706	0.177	0.618	1.06768676419794e-53
Gins2	8.72811144723907e-58	3.12183	0.214	0.038	2.12381135845668e-53
Sftpd	1.09885304329432e-57	-0.814394	0.595	0.891	2.67383911024807e-53
Cntln	1.74132550213788e-57	3.27024	0.225	0.042	4.2371673443521e-53
Rfc5	1.85186842195179e-57	2.61123	0.279	0.065	4.50615143113529e-53
Ncapd2	5.90931670933197e-57	3.19239	0.249	0.054	1.43791403488175e-52
Cdca8	8.8275372456597e-57	3.52747	0.322	0.094	2.14800463798637e-52
Cenpa	1.14590094435744e-56	4.19808	0.191	0.031	2.78832076790497e-52
Lcn2	1.58329057636669e-56	-0.955493	0.911	0.982	3.85262095947306e-52
Lrr1	2.73948785002163e-56	6.88164	0.064	0	6.66599578545763e-52
Cenpu	4.01955821368456e-56	3.64599	0.123	0.01	9.78079100135865e-52
Kif20b	1.20686860716525e-55	3.41393	0.299	0.081	2.93667338181521e-51
Aurka	6.18999570070393e-55	4.15015	0.123	0.011	1.50621165385229e-50
Ltf	7.09195626583731e-55	-0.940693	0.809	0.946	1.72568571816619e-50
Ptprm	1.43617377004919e-54	-0.683965	0.559	0.9	3.49464163466069e-50
Cdcp1	1.50523419409906e-54	-0.562029	0.69	0.947	3.66268636450123e-50
Espl1	2.17427032004399e-54	5.99951	0.073	0.001	5.29065196976305e-50
Dna2	2.2771019123437e-54	3.21608	0.166	0.023	5.54087208330593e-50
Npas2	2.95709962327073e-54	-0.768138	0.424	0.818	7.19551051330466e-50
St14	3.7093398534921e-54	-0.612719	0.694	0.965	9.02593666550232e-50
Ncoa7	6.26580907300074e-54	-0.776789	0.817	0.972	1.52465932173327e-49
Clca1	8.87485147246134e-54	-0.86677	0.771	0.931	2.15951760879402e-49
Diaph3	1.06657746064413e-53	3.48262	0.347	0.114	2.59530293498537e-49
Plac8	1.49337856178277e-53	-0.958092	0.709	0.908	3.633838054386e-49
Ncapg2	1.57757173605122e-53	3.35992	0.254	0.06	3.83870530533343e-49
Dusp16	1.61296063950606e-53	-0.56444	0.509	0.875	3.9248171241101e-49
Lamc2	1.93737326683772e-53	-1.27952	0.603	0.899	4.71421037019623e-49
Bcas3	2.70592142680177e-53	-0.542733	0.53	0.874	6.58431860783674e-49
Nrm	3.95634330766449e-53	3.30317	0.175	0.026	9.62697017054e-49
Bend4	5.47027146921723e-53	-1.07177	0.368	0.728	1.33108115660463e-48
Usp6nl	7.03020812424068e-53	-0.782517	0.732	0.968	1.71066054287149e-48
Cdc25c	1.01742804019507e-52	5.1742	0.073	0.002	2.47570765020667e-48
Sapcd2	1.21739860184226e-52	6.48096	0.06	0	2.96229601786277e-48
Cenpe	1.34771948356808e-52	3.75439	0.272	0.071	3.2794058193662e-48
Fanci	2.4952600725998e-52	4.85691	0.089	0.004	6.07171633465709e-48
Fosl2	2.63182138210899e-52	-0.591123	0.435	0.817	6.4040109690858e-48
Klhl24	8.86363082713186e-52	-0.329477	0.439	0.813	2.15678728916599e-47
Ccne1	1.62796925468088e-51	3.93924	0.125	0.012	3.96133758741497e-47
Rnd3	1.76727765589615e-51	-0.91425	0.42	0.792	4.3003167200921e-47
Tbc1d22a	3.32675986932406e-51	-0.739063	0.395	0.76	8.09500479002624e-47
Ankle1	3.96030627057047e-51	6.65548	0.056	0	9.63661324817912e-47
Capn5	5.58170487814919e-51	-0.744644	0.52	0.857	1.35819624800004e-46
Atxn1	6.12391935160331e-51	-0.663238	0.846	0.989	1.49013329582563e-46
Nfkb1	6.61640059321319e-51	-0.762307	0.586	0.882	1.60996875634657e-46
Smc2	7.65606816969676e-51	2.82585	0.403	0.16	1.86295106773231e-46
Pglyrp1	9.79204383032977e-51	-0.925058	0.42	0.78	2.38269802523414e-46
Chn2	9.79922850431254e-51	-0.729858	0.653	0.922	2.38444627195437e-46
Cks1b	1.32393082670463e-50	2.75048	0.385	0.146	3.22152088062038e-46
Mctp2	3.21534351720895e-50	-0.657036	0.258	0.653	7.82389538042453e-46
H2ac22	3.69120041245532e-50	5.42519	0.085	0.004	8.98179796362752e-46
Ctsl	8.74392277826604e-50	-0.964688	0.792	0.945	2.12765872963548e-45
Cdt1	1.1419556758709e-49	3.06119	0.191	0.035	2.77872074609667e-45
Zc3h12a	1.26909251848695e-49	-0.508429	0.189	0.579	3.0880828252343e-45
Lyn	1.35849759563609e-49	-0.73761	0.726	0.947	3.3056321994613e-45
Myo1d	1.37093662956301e-49	-0.665396	0.848	0.99	3.33590010071566e-45
Fancb	2.13737552174459e-49	4.18435	0.087	0.005	5.20087585706111e-45
Psmc3ip	2.8433965260074e-49	3.31793	0.137	0.017	6.91883676673381e-45
Atp8b1	4.54973348919253e-49	-0.533142	0.694	0.961	1.10708664992522e-44
Qsox1	4.80362912268984e-49	-0.757071	0.472	0.844	1.16886707442412e-44
Prc1	5.7443353692234e-49	3.81735	0.287	0.082	1.39776912539313e-44
Xdh	9.30069232039809e-49	-0.306257	0.353	0.771	2.26313746232247e-44
H2ac10	9.38577172178253e-49	6.51616	0.058	0	2.28383983306134e-44
Atad5	1.30979767976203e-48	2.63539	0.308	0.094	3.18713069416495e-44
Eme1	1.50602870108453e-48	4.10555	0.091	0.006	3.66461963834898e-44
Irak2	1.96341809465063e-48	-0.705092	0.464	0.802	4.77758524971337e-44
Srgap1	4.70785981531251e-48	-0.650198	0.532	0.841	1.14556352885999e-43
C3	5.29731246745579e-48	-0.77055	0.888	0.963	1.28899504270602e-43
Slc5a8	7.99674638213256e-48	-1.30936	0.127	0.52	1.94584829716432e-43
Mcub	9.41626649803801e-48	-0.935645	0.222	0.598	2.29126012696759e-43
Btg2	1.01883688165231e-47	-0.76541	0.611	0.91	2.47913578412457e-43
Psd3	1.14804021609918e-47	-0.43115	0.497	0.84	2.79352625783413e-43
Med13l	1.17040096494552e-47	-0.550595	0.674	0.959	2.84793666800192e-43
Trim25	1.89186296735927e-47	-0.737404	0.597	0.887	4.60347015847532e-43
Pigr	2.09544588368356e-47	-0.694539	0.622	0.901	5.0988484687672e-43
Iqgap2	2.14582876749076e-47	-0.656697	0.809	0.978	5.22144513993527e-43
Il1a	2.19849327862458e-47	-1.92296	0.102	0.466	5.34959369487718e-43
Prkch	2.35589792304769e-47	-0.656177	0.499	0.814	5.73260641615196e-43
Flnb	2.67880535011243e-47	-0.740065	0.742	0.965	6.51833705842857e-43
Raph1	2.99934339727768e-47	-0.610067	0.59	0.878	7.29830228859577e-43
Ell2	3.48527171882876e-47	-0.930754	0.42	0.774	8.48071167342603e-43
Orc1	3.49861163030284e-47	2.83033	0.181	0.032	8.5131716800159e-43
Grpel2	4.28547008424859e-47	-0.652184	0.387	0.732	1.04278343560021e-42
Smox	4.40852059314746e-47	-0.726114	0.593	0.884	1.07272531593057e-42
Cd47	6.33268737284256e-47	-0.461489	0.678	0.933	1.54093281843378e-42
Fcgbp	6.84626627476099e-47	-0.710511	0.709	0.925	1.66590197263759e-42
Kif18b	7.16666540632609e-47	5.48232	0.06	0.001	1.74386469332133e-42
Plk4	9.73844745003959e-47	2.70381	0.227	0.052	2.36965641801813e-42
Itgb6	1.17158826430633e-46	-0.798485	0.511	0.817	2.85082572353658e-42
Ly6a	1.39402075898915e-46	-0.844713	0.661	0.897	3.3920707128483e-42
Hivep1	1.73291641670336e-46	-0.452007	0.555	0.881	4.21670551676428e-42
Chp1	1.95716794581654e-46	-0.699336	0.455	0.794	4.76237676255539e-42
Zdhhc14	2.31461200825154e-46	-0.909511	0.331	0.685	5.63214539967847e-42
Nsl1	2.79153205135124e-46	4.85663	0.075	0.003	6.79263494055297e-42
Fen1	3.17106726068068e-46	2.56662	0.308	0.097	7.71615796541429e-42
Fancd2	3.59586257284051e-46	3.36281	0.114	0.012	8.74981239849281e-42
Gins1	4.6890167892386e-46	3.29584	0.17	0.029	1.14097845532543e-41
Rfc4	5.43770668685499e-46	2.757	0.274	0.078	1.32315716811242e-41
Slc26a9	1.49064551794057e-45	-0.655522	0.218	0.607	3.62718773880479e-41
Slc5a1	1.68286545557612e-45	-0.967046	0.216	0.581	4.09491651305338e-41
Prkg1	1.93104262450797e-45	-0.871313	0.561	0.869	4.69880601821525e-41
Myo5b	3.17942412361422e-45	-0.478995	0.624	0.92	7.73649271999048e-41
Herc4	3.54686769037775e-45	-0.966987	0.609	0.92	8.63059315099618e-41
Ndrg1	3.59577097354982e-45	-1.16065	0.17	0.533	8.74958950993877e-41
Fbxw11	4.91810127563314e-45	-0.499476	0.638	0.927	1.19672158339981e-40
Naip1	5.18435821570809e-45	-0.352986	0.376	0.74	1.26150988462825e-40
Gm20559	5.21111538836924e-45	-0.510617	0.464	0.8	1.26802070745189e-40
Knstrn	7.73746318775306e-45	3.32048	0.216	0.051	1.88275691747595e-40
Timeless	8.63418688942934e-45	2.8817	0.202	0.043	2.10095669580484e-40
Lpp	1.5426261441924e-44	-0.415827	0.879	0.993	3.75367219666338e-40
Fndc3a	1.61348142914973e-44	-0.731341	0.807	0.981	3.92608436155004e-40
Zgrf1	1.99655555865721e-44	2.75867	0.173	0.031	4.8582186408806e-40
Ifngr2	2.19666648023069e-44	-0.477218	0.611	0.893	5.34514854634535e-40
Atrnl1	3.19807770065814e-44	-0.560293	0.782	0.985	7.78188246901146e-40
Il13ra1	3.30881200072717e-44	-0.504959	0.441	0.795	8.05133224136942e-40
Tenm4	3.34314754414097e-44	-0.796554	0.559	0.875	8.13488091915822e-40
Muc4	3.76128606651689e-44	-0.675624	0.892	0.976	9.15233738565556e-40
Mcm3	3.85219500649597e-44	2.95646	0.38	0.159	9.37354610930664e-40
Nceh1	4.44825559573343e-44	-0.756041	0.345	0.672	1.08239403410982e-39
Parpbp	6.56982690641831e-44	3.9911	0.102	0.009	1.59863598113877e-39
Smad3	9.56155690000648e-44	-0.755875	0.47	0.803	2.32661364047858e-39
Mab21l3	1.24062702251969e-43	-0.923034	0.601	0.865	3.01881773389716e-39
Plekhg1	1.49145742193026e-43	-0.482789	0.678	0.935	3.62916334478289e-39
Cldn4	1.92609535710931e-43	-1.2304	0.27	0.607	4.68676783245409e-39
Dtnb	1.98546184203423e-43	-0.73891	0.405	0.744	4.83122430022189e-39
Gm49890	2.10897320064355e-43	-0.568331	0.553	0.861	5.13176448912594e-39
Ptprs	2.37498075448052e-43	-0.368313	0.599	0.89	5.77904066987745e-39
Tgfbr2	2.60687521606157e-43	-0.593818	0.568	0.871	6.34330946324262e-39
Troap	2.74331387635985e-43	6.04855	0.052	0	6.67530565534641e-39
Blnk	2.88983988098448e-43	-0.822168	0.464	0.787	7.03184738239953e-39
H2ac8	2.94254229076489e-43	4.38745	0.212	0.05	7.16008815611822e-39
Ccser1	4.15239552722142e-43	-0.56521	0.407	0.773	1.01040240363879e-38
Cacna2d3	4.30708063170788e-43	-0.67933	0.582	0.875	1.04804193011348e-38
Prap1	4.36222454353976e-43	-0.834798	0.875	0.949	1.06146009817953e-38
Abca1	6.03354437151505e-43	-0.4457	0.426	0.809	1.46814235192076e-38
Map3k2	6.6901818945453e-43	-0.558102	0.574	0.895	1.62792196039971e-38
Zhx2	7.14948555450954e-43	-0.615362	0.252	0.609	1.73968431997881e-38
Large1	1.19028855866912e-42	-0.731918	0.468	0.823	2.89632914980957e-38
Rin2	1.36264394740211e-42	-0.232739	0.453	0.801	3.31572151721356e-38
Ptgs2	1.4670500080536e-42	-1.14128	0.148	0.509	3.56977278459681e-38
Mxd1	1.653310114373e-42	-0.931997	0.364	0.723	4.02299950130382e-38
Rnf186	2.27905629410502e-42	-0.781781	0.274	0.631	5.54562768044574e-38
Lockd	2.67154719439969e-42	3.83021	0.116	0.014	6.50067578813278e-38
Fbxl20	3.88067532836403e-42	-0.613099	0.391	0.746	9.44284727650818e-38
Rpa2	4.33024141135018e-42	2.45975	0.229	0.058	1.05367764262384e-37
Foxo1	4.72879122492672e-42	-0.643609	0.636	0.92	1.15065676876142e-37
Gabrp	4.81818393536281e-42	-0.763018	0.468	0.798	1.17240869699183e-37
Egln3	4.87222117712929e-42	-0.637394	0.663	0.892	1.18555757903087e-37
Hells	8.58691971805072e-42	3.30878	0.36	0.15	2.08945517499328e-37
Ube2t	9.83175701014024e-42	2.67945	0.156	0.027	2.39236143327742e-37
Ero1a	1.02383746348218e-41	-0.752333	0.534	0.816	2.49130369989118e-37
Nucb2	1.4253050322734e-41	-0.763912	0.339	0.659	3.46819473503087e-37
Relb	1.62358481606911e-41	-0.820984	0.1	0.436	3.95066893294098e-37
Brca2	1.91448365459263e-41	2.45254	0.254	0.072	4.65851307672026e-37
Hpcal1	2.07351308188614e-41	-0.538684	0.52	0.82	5.04547938215355e-37
Upk3bl	2.1550399156574e-41	-0.876015	0.185	0.522	5.24385862676916e-37
Ece1	2.19273430877343e-41	-0.477952	0.476	0.792	5.33558039353838e-37
Fndc3b	2.20469049956297e-41	-0.632758	0.775	0.98	5.36467339258658e-37
H3c3	2.77720954480131e-41	5.06419	0.185	0.04	6.75778398536503e-37
Steap2	2.81081891107244e-41	-0.328591	0.437	0.761	6.83956565631258e-37
Hk2	3.19299205699324e-41	-0.511807	0.597	0.873	7.76950757228166e-37
Gpbp1l1	3.95657312167929e-41	-0.378479	0.586	0.901	9.6275293769822e-37
Lama3	4.30579271447685e-41	-0.763097	0.763	0.949	1.04772854121365e-36
Mid2	4.40224875605692e-41	-0.51055	0.366	0.715	1.07119918981133e-36
Ndc1	4.4655152837264e-41	2.26766	0.264	0.076	1.08659383398915e-36
Wasl	4.52653056830154e-41	-0.569959	0.667	0.935	1.10144068318481e-36
Ocln	4.59539729551188e-41	-0.606766	0.47	0.801	1.11819802391691e-36
Ptprj	5.03924928198329e-41	-0.685501	0.798	0.979	1.22620052778499e-36
Pola1	5.46144613346727e-41	2.6457	0.432	0.213	1.32893368765659e-36
Rictor	6.43338199382531e-41	-0.517921	0.663	0.928	1.56543484055751e-36
Arg1	6.64819499248603e-41	-0.962286	0.499	0.821	1.61770528752163e-36
Cd55	6.78506445129308e-41	-0.511512	0.757	0.957	1.65100973293315e-36
Tiparp	7.28513586510268e-41	-1.14505	0.428	0.732	1.77269211005544e-36
Trp53inp2	8.26390765837197e-41	-0.645481	0.166	0.499	2.01085665051165e-36
Ldlrad4	9.85253966570139e-41	-0.726581	0.763	0.97	2.39741847685512e-36
Elmo1	1.00670856872842e-40	-0.601481	0.553	0.85	2.44962396028687e-36
Nbeal1	1.05518461291412e-40	-0.308089	0.636	0.916	2.56758071860392e-36
Tapbp	1.22551743552665e-40	-0.637473	0.486	0.772	2.98205157586701e-36
Kif18a	1.35155098989077e-40	3.15668	0.15	0.026	3.2887290237012e-36
Cdca2	1.40750382108063e-40	3.0806	0.187	0.041	3.42487904783551e-36
Myof	1.69844565438153e-40	-0.48658	0.632	0.902	4.13282781080658e-36
Slc22a23	1.71165665431624e-40	-0.843902	0.318	0.644	4.16497413694772e-36
Spdl1	1.82874996967541e-40	2.77373	0.198	0.045	4.44989730121119e-36
Eps8	1.87093035680448e-40	-0.816765	0.757	0.953	4.55253483721235e-36
Mad2l1	2.17888970788384e-40	1.88103	0.293	0.095	5.30189232619375e-36
Wnt4	2.26918527415219e-40	-0.534606	0.254	0.585	5.52160852759453e-36
Sqstm1	2.59345292142641e-40	-0.730006	0.545	0.837	6.31064899370688e-36
Tyms	2.95828080095395e-40	2.40538	0.385	0.168	7.19838467296124e-36
Plet1	3.17102475665026e-40	-0.672099	0.888	0.99	7.71605454035707e-36
Snx13	3.4291844320344e-40	-0.371454	0.528	0.846	8.34423447846931e-36
Ska3	4.2351217024683e-40	4.06162	0.073	0.004	1.03053216386161e-35
Tgif1	4.68638736258255e-40	-0.47018	0.478	0.789	1.14033863693721e-35
Oip5	4.9894663351044e-40	3.98553	0.069	0.003	1.21408684332095e-35
Hsd17b2	4.99397558339188e-40	-0.840217	0.148	0.496	1.21518407870675e-35
Itgam	5.03376808595544e-40	-0.892486	0.252	0.625	1.22486678835554e-35
Ttc9	5.67967948346701e-40	-0.643208	0.397	0.728	1.38203640871203e-35
Fnip1	6.57326799302692e-40	-0.485823	0.499	0.808	1.59947330074324e-35
Sik3	6.70009998457102e-40	-0.541771	0.661	0.934	1.63033532924567e-35
Gsto1	6.97665922735842e-40	-0.643189	0.771	0.959	1.69763048979312e-35
Eeig2	7.07661382428325e-40	-0.889787	0.156	0.498	1.72195244186284e-35
Mmp7	7.15889938108776e-40	-0.828691	0.2	0.556	1.74197498640009e-35
Slc26a4	7.48930747310099e-40	-0.844805	0.179	0.549	1.82237318742966e-35
Cd200l2	7.50339636256186e-40	4.92879	0.054	0.001	1.82580143690218e-35
Ifi44	8.12328869217702e-40	-0.554256	0.331	0.675	1.97663983746743e-35
Vtcn1	9.14712101281611e-40	-0.703127	0.611	0.902	2.22576895604854e-35
Osbpl3	1.0965053891961e-39	-0.510113	0.794	0.971	2.66812656353087e-35
Flt1	1.17362963567327e-39	-0.617117	0.216	0.568	2.85579299248376e-35
Aunip	1.26411895021648e-39	5.66127	0.048	0	3.07598064156175e-35
Adgrl2	1.27214560384895e-39	-0.503587	0.538	0.852	3.09551189784566e-35
Ptpn13	1.2870318252141e-39	-0.514659	0.79	0.973	3.13173454029347e-35
Cdc42bpb	1.49866145429997e-39	-0.444437	0.593	0.874	3.64669291674813e-35
Trio	1.64695269592857e-39	-0.496394	0.644	0.944	4.00752999500298e-35
Tnip3	1.79448121330741e-39	-1.67513	0.098	0.432	4.36651113634093e-35
Depdc1b	2.47072915640635e-39	4.73477	0.06	0.002	6.01202525628357e-35
Arhgap12	2.56313037461156e-39	-0.454378	0.505	0.836	6.2368651405423e-35
Kdm5b	2.6024556503043e-39	-0.462352	0.484	0.83	6.33255533388546e-35
Dnph1	2.64087302286202e-39	2.2888	0.222	0.057	6.42603632653016e-35
Gda	2.82815826782861e-39	-0.665609	0.449	0.79	6.88175751310736e-35
Zfp367	2.96784915400066e-39	2.9939	0.185	0.042	7.2216673464298e-35
Wwtr1	3.28689561607268e-39	-0.665047	0.457	0.768	7.99800310258966e-35
H3c2	4.35832224107485e-39	4.62786	0.069	0.004	1.06051055092074e-34
Steap1	4.46968351914626e-39	-1.09482	0.181	0.505	1.08760809071386e-34
Hivep3	5.37526792090145e-39	-0.655301	0.495	0.802	1.30796394319295e-34
0610040J01Rik	5.58066866634596e-39	-0.519817	0.701	0.954	1.35794410658196e-34
Nfkbiz	5.60783615888913e-39	-0.5793	0.59	0.877	1.36455477254249e-34
Otud7b	6.01108448459362e-39	-0.625073	0.551	0.852	1.46267718763617e-34
Tcf4	6.79204104221196e-39	-0.457753	0.547	0.857	1.65270734680144e-34
Prkar2b	7.03717006967083e-39	-0.875137	0.146	0.481	1.712354593053e-34
Mtss1	8.50620676464968e-39	-0.511692	0.391	0.73	2.06981529204221e-34
Cxcl17	8.66193046580272e-39	-0.603573	0.622	0.9	2.10770754024378e-34
Itpk1	9.33123462125227e-39	-0.894791	0.424	0.716	2.27056932038932e-34
Slc37a1	1.10477289663502e-38	-0.58123	0.405	0.716	2.688243889382e-34
Vmp1	1.37587022552288e-38	-0.399055	0.74	0.959	3.34790501976482e-34
Pbx1	1.38642294584586e-38	-0.45541	0.884	0.995	3.37358295412673e-34
Gm15675	1.48226764369312e-38	-0.51037	0.252	0.58	3.60680185739848e-34
Exoc6b	1.50409590199844e-38	-0.267468	0.709	0.958	3.65991655833281e-34
Ddr1	1.6274607643072e-38	-0.468806	0.476	0.787	3.9601002777887e-34
Fgd3	2.13817108658341e-38	-0.631305	0.368	0.694	5.20281170498342e-34
H1f10	2.21784514265357e-38	2.52666	0.152	0.028	5.39668258561894e-34
Met	2.37588021652535e-38	-0.494893	0.655	0.915	5.78122933087114e-34
Ypel2	2.39205724885246e-38	-0.64258	0.422	0.758	5.82059290363269e-34
Setbp1	2.44031353149018e-38	-0.445083	0.869	0.993	5.93801491617506e-34
Pif1	2.85590889448587e-38	6.64053	0.042	0	6.94928311295247e-34
Trak1	3.53513376439115e-38	-0.364753	0.599	0.895	8.60204098889298e-34
Tipin	4.09258982666487e-38	2.60541	0.331	0.13	9.95849882522362e-34
Trim15	4.09538804825286e-38	-1.75878	0.141	0.459	9.96530773781367e-34
Muc20	4.24469641480018e-38	-0.45446	0.36	0.695	1.03286197861333e-33
H2ac24	4.27261915261941e-38	4.5073	0.177	0.039	1.03965641840688e-33
Vcl	4.95271228544717e-38	-0.801642	0.653	0.921	1.20514348041786e-33
Spint2	5.89115959265694e-38	-0.424129	0.786	0.983	1.43349586368121e-33
Tnfaip3	6.04279382356161e-38	-1.66359	0.127	0.445	1.47039302108725e-33
Osmr	8.0631883125997e-38	-0.530556	0.351	0.684	1.96201561210488e-33
Micu1	8.06665849117857e-38	-0.375038	0.528	0.829	1.96286001065848e-33
Ckap2l	1.0756286378821e-37	3.03824	0.208	0.054	2.6173271645585e-33
Parp14	1.1314664530084e-37	-0.571144	0.58	0.873	2.75319732010534e-33
Csgalnact1	1.13349379447594e-37	-1.01545	0.218	0.54	2.7581304500983e-33
Ube2h	1.15210162020121e-37	-0.412575	0.69	0.941	2.8034088724356e-33
Skil	1.27480257448924e-37	-0.495649	0.607	0.9	3.10197710450467e-33
Casz1	1.43457364229925e-37	-0.24707	0.353	0.688	3.49074804380678e-33
Itpripl2	1.50758327916312e-37	-0.489566	0.133	0.461	3.66840239318762e-33
Pde4d	1.84541488267368e-37	-0.56289	0.823	0.982	4.49044803400987e-33
Slc49a4	2.12054852689308e-37	-0.888971	0.281	0.584	5.15993073048892e-33
Frmd6	2.45721155276451e-37	-0.733683	0.262	0.588	5.97913287134187e-33
H2bc18	2.55002449498654e-37	4.60232	0.096	0.01	6.20497460365074e-33
Malt1	3.02703474879101e-37	-0.395375	0.405	0.728	7.36568365423317e-33
Gtpbp2	3.80557054412811e-37	-0.271696	0.364	0.669	9.26009480502693e-33
Tmprss11d	4.13122713668521e-37	-0.449936	0.356	0.701	1.00525149916961e-32
Hivep2	4.1587222720598e-37	-0.569748	0.751	0.97	1.01194189046031e-32
Mcm8	4.31121427155499e-37	3.18449	0.139	0.024	1.04904776869748e-32
Foxn3	4.85863638768816e-37	-0.39007	0.551	0.888	1.18225199221616e-32
Tes	5.64603921058828e-37	-0.566636	0.574	0.868	1.37385072111245e-32
Lgals1	6.03852248903198e-37	2.1764	0.227	0.062	1.46935367725615e-32
Muc1	8.31295431999272e-37	-0.357687	0.565	0.863	2.02279117468383e-32
Tcf7l2	9.11168062767488e-37	-0.439993	0.638	0.918	2.21714524713213e-32
Slc16a14	9.23640706311202e-37	-0.348102	0.279	0.629	2.24749493066705e-32
Proser2	1.0343477862798e-36	-0.960358	0.351	0.641	2.51687846835464e-32
Slc4a4	1.08360736457319e-36	-0.878945	0.254	0.59	2.63674180021593e-32
Ccdc186	1.10486536084886e-36	-0.339615	0.541	0.844	2.68846888255354e-32
Zbp1	1.31394635486062e-36	-0.876788	0.183	0.504	3.19722566528233e-32
Ube2e2	1.50806280932055e-36	-0.562637	0.555	0.874	3.6695692339197e-32
Rapgef5	1.62752165994733e-36	-0.419927	0.522	0.824	3.96024845514985e-32
Plekhm3	1.76640967023633e-36	-1.10414	0.225	0.529	4.29820465058607e-32
Rgl3	1.81351557731031e-36	-0.112409	0.501	0.82	4.41282745426917e-32
Patj	2.23636895236355e-36	-0.413275	0.653	0.942	5.44175657178622e-32
Klf6	2.34521650134105e-36	-1.0347	0.486	0.789	5.70661531271317e-32
Pgm2	2.52003311174116e-36	-0.661128	0.356	0.641	6.13199657079976e-32
Rrm1	2.8708969287925e-36	2.46779	0.457	0.267	6.98575349683079e-32
Smad1	2.98162930824254e-36	-0.258633	0.491	0.787	7.25519859574657e-32
Itga2	3.0677262719925e-36	-0.816492	0.484	0.799	7.46469833763935e-32
Itgb8	3.23853107633214e-36	-0.38708	0.222	0.56	7.880317668039e-32
Mindy2	3.31695192627621e-36	-0.474011	0.328	0.637	8.07113912220791e-32
Taok3	3.64435621864592e-36	-0.404664	0.638	0.91	8.86781198683112e-32
Ssh1	3.71009612976912e-36	-0.47969	0.333	0.629	9.0277769125672e-32
Pim1	3.7592588275177e-36	-0.76431	0.455	0.755	9.14740450499881e-32
Cpm	4.02955298541835e-36	-0.742834	0.453	0.771	9.80511127941846e-32
Olfm1	4.15916987141223e-36	-0.959658	0.424	0.745	1.01205080481074e-31
Ifi203	4.19649457572574e-36	-1.03046	0.2	0.53	1.02113302511134e-31
Tmc4	4.79115255998794e-36	-0.182341	0.634	0.914	1.16583115242186e-31
Baiap2l1	4.89100223427204e-36	-0.541023	0.532	0.836	1.19012757366542e-31
Lrg1	5.31549124869733e-36	-0.907679	0.15	0.474	1.29341848554552e-31
Nr6a1	7.34336387096004e-36	-0.493215	0.628	0.925	1.78686073072071e-31
Csnk1e	7.43160225599817e-36	-0.477136	0.472	0.779	1.80833177695203e-31
Rpa1	7.55726822758907e-36	2.2732	0.326	0.126	1.83891007781925e-31
Gja1	7.75927352123302e-36	-0.875873	0.168	0.47	1.88806402592163e-31
Grn	8.09516537712173e-36	-0.474969	0.599	0.851	1.96979659121503e-31
Wwox	8.18365297863818e-36	-0.42293	0.597	0.871	1.99132827929203e-31
Wdr76	8.55248206515734e-36	2.29289	0.272	0.092	2.08107546091474e-31
Rdh10	9.40983474748886e-36	-0.510556	0.545	0.834	2.28969508910646e-31
Septin9	1.03572536195976e-35	-0.633501	0.59	0.88	2.52023052325667e-31
Cdk17	1.04754118715164e-35	-0.43678	0.453	0.747	2.54898197069609e-31
Fbxo32	1.26794238572318e-35	-0.538616	0.168	0.491	3.08528420718021e-31
Tnfsf10	1.38674119850501e-35	-0.493239	0.457	0.764	3.37435735832225e-31
Urah	1.70166846879521e-35	-0.307531	0.308	0.626	4.14066988511938e-31
Ddx60	1.73223412390583e-35	-1.00296	0.27	0.586	4.21504529370004e-31
Tmcc3	2.06989506261257e-35	-0.502684	0.603	0.886	5.03667565585516e-31
Il36a	2.17834572347584e-35	-0.371022	0.193	0.536	5.30056864893377e-31
Nedd4l	2.30003950092172e-35	-0.423301	0.692	0.94	5.59668611759282e-31
Nedd9	2.38794406643009e-35	-0.585284	0.622	0.89	5.81058429684435e-31
Mndal	2.86751150580245e-35	-0.621828	0.272	0.613	6.9775157470691e-31
Clic4	3.00442325504053e-35	-1.30382	0.462	0.74	7.31066310649013e-31
Map7	3.19419575619728e-35	-0.39985	0.663	0.945	7.77243653355484e-31
Ceacam1	3.2674449794046e-35	-0.714447	0.742	0.942	7.95067386838521e-31
Stmn1	4.32445853268156e-35	2.49918	0.445	0.246	1.05227049475741e-30
Ccdc34	4.42178114862954e-35	2.51558	0.299	0.114	1.07595200689603e-30
Fam3d	6.58456809661933e-35	-0.677506	0.374	0.689	1.60222295495038e-30
Dnaaf9	6.66546733531014e-35	-0.320207	0.503	0.803	1.62190816670102e-30
Stxbp3	6.79252267121318e-35	-0.488347	0.522	0.802	1.6528245415863e-30
Susd6	7.36771524318771e-35	-0.285259	0.455	0.773	1.79278615012486e-30
Tgfbr1	7.58739955163662e-35	-0.560888	0.538	0.836	1.84624193289974e-30
Serpina1e	9.49553304746693e-35	-0.731174	0.655	0.876	2.31054805644013e-30
Mapk6	9.49854072281433e-35	-0.366708	0.486	0.777	2.31127991408241e-30
Rnf169	9.68004527707037e-35	-0.36606	0.561	0.856	2.35544541726953e-30
Lpgat1	9.70476926221426e-35	-0.601893	0.659	0.899	2.3614615045746e-30
Nupr1	1.02075394331172e-34	-0.395104	0.304	0.637	2.4838005702604e-30
Gab1	1.12876792381847e-34	-0.630783	0.335	0.632	2.74663098902748e-30
Foxm1	1.14498578508181e-34	3.39546	0.106	0.015	2.78609391083958e-30
Cd99l2	1.18984304052037e-34	-0.645157	0.314	0.61	2.89524507049822e-30
Snx7	1.27846419442266e-34	-0.526499	0.551	0.834	3.11088692428866e-30
Cdo1	1.32342160932126e-34	-0.880493	0.362	0.666	3.22028180196143e-30
Ulbp1	1.33219153309166e-34	2.28713	0.195	0.05	3.24162165747194e-30
Sipa1l3	1.36712094846847e-34	-0.3835	0.586	0.878	3.32661540390833e-30
Atp6v0a1	1.45549026815797e-34	-0.35647	0.443	0.744	3.54164446950879e-30
Pdzk1ip1	1.842599850608e-34	-0.495567	0.451	0.75	4.48359821648444e-30
Atg9b	2.45039647443131e-34	-0.69125	0.089	0.394	5.96254974123372e-30
Wbp1l	2.65016644342286e-34	-0.553748	0.499	0.807	6.44865000678086e-30
Sik1	2.73491140892919e-34	-0.470852	0.239	0.551	6.65485993134739e-30
Specc1	3.01121819109063e-34	-0.508312	0.576	0.862	7.32719722438083e-30
Shb	3.26856463119528e-34	-0.73932	0.376	0.662	7.95339831708748e-30
Irf7	3.56922119630581e-34	-0.328217	0.279	0.622	8.68498593697093e-30
Zcchc2	3.60488011649489e-34	-0.549233	0.532	0.8	8.77175478746702e-30
Hbp1	3.63760954799307e-34	-0.346501	0.364	0.67	8.85139531313154e-30
Abi1	3.68161660860326e-34	-0.418283	0.707	0.966	8.95847769371432e-30
Usp32	3.71407289978048e-34	-0.443252	0.532	0.843	9.03745358703584e-30
Trpv6	3.7183162138962e-34	-0.610381	0.661	0.911	9.04777884327363e-30
Zfand3	4.51742570462858e-34	-0.390583	0.717	0.967	1.09922519670727e-29
Plekha6	4.59619025921276e-34	-0.476165	0.609	0.879	1.11839097577424e-29
Mpzl3	4.63650131182321e-34	-0.313565	0.283	0.586	1.12819986420594e-29
Chtf18	5.13698854142033e-34	3.00615	0.058	0.003	1.24998342178381e-29
Mast4	5.20439497374544e-34	-0.436234	0.59	0.89	1.26638542896148e-29
Cd68	5.44940275237627e-34	-1.20692	0.143	0.44	1.32600317173572e-29
Otud3	5.5739279540647e-34	-0.648308	0.283	0.575	1.35630388906256e-29
Appl2	5.63872887629769e-34	-0.245084	0.418	0.716	1.37207189746952e-29
Fnbp1	7.37175516895009e-34	-0.26923	0.686	0.914	1.79376918526063e-29
Abca3	7.50810854246614e-34	-0.510937	0.387	0.682	1.82694805163829e-29
Polk	8.29973603042365e-34	-0.418225	0.322	0.63	2.01957476828299e-29
Lrch1	9.15233715877227e-34	-0.531348	0.603	0.88	2.22703820084406e-29
Gbp2	9.55488152187514e-34	-1.55811	0.091	0.37	2.32498932071788e-29
Igf1r	1.09075952373667e-33	-0.554905	0.748	0.958	2.65414514910844e-29
Hgfac	1.10787879822728e-33	-0.603138	0.225	0.545	2.69580147972644e-29
Nectin3	1.26123766902534e-33	-0.315138	0.476	0.774	3.06896962003935e-29
Tns3	1.27079777501604e-33	-0.299647	0.64	0.916	3.09223222594654e-29
Kif24	1.32675407731819e-33	2.49941	0.218	0.063	3.22839069633834e-29
Myo6	1.43675022484763e-33	-0.352214	0.609	0.901	3.49604432212175e-29
Epas1	1.47043470599819e-33	-0.535944	0.364	0.683	3.57800877010541e-29
Kdm3a	1.47473755384694e-33	-0.269352	0.555	0.853	3.58847888977577e-29
Macc1	1.53368716823649e-33	-0.389629	0.644	0.905	3.73192098646985e-29
Marchf3	1.53524305679387e-33	-0.769404	0.289	0.612	3.73570693009652e-29
Atg10	1.61046889661209e-33	-0.489043	0.295	0.59	3.91875396612621e-29
Oasl2	1.64598145144593e-33	-0.657706	0.383	0.697	4.00516666580339e-29
Mcm2	1.76076586297997e-33	2.25383	0.356	0.16	4.28447157438915e-29
C430049B03Rik	2.09495706785646e-33	-0.973046	0.229	0.537	5.09765903321513e-29
Vegfa	2.37367343229631e-33	-0.179648	0.328	0.65	5.7758595628066e-29
Myo1b	2.39428876871778e-33	-0.519546	0.605	0.895	5.82602286092098e-29
Rhpn2	2.52378584975257e-33	-0.235213	0.584	0.857	6.14112810820293e-29
Tec	2.53136518882833e-33	-0.348555	0.57	0.87	6.15957091397596e-29
Ifi202b	2.53845368746594e-33	-0.574468	0.154	0.455	6.17681935771088e-29
Wdfy2	2.68738075697404e-33	-0.455673	0.372	0.679	6.53920359594493e-29
Clec2d	3.13197353492321e-33	-0.456533	0.291	0.606	7.62103120252865e-29
Serping1	3.28715770576726e-33	-0.67616	0.146	0.437	7.99864084544348e-29
Mtmr3	3.37160198137997e-33	-0.235304	0.555	0.849	8.20411910129187e-29
B4galt1	4.34970857206192e-33	-0.321052	0.611	0.892	1.05841458683983e-28
Hirip3	4.37198675579986e-33	2.29284	0.272	0.097	1.06383553728878e-28
Ehbp1	4.60137451083411e-33	-0.201267	0.472	0.788	1.11965245972126e-28
Cdca5	5.13362065968144e-33	3.84257	0.091	0.011	1.24916391512028e-28
Slfn9	5.88567943939276e-33	2.25968	0.378	0.181	1.43216237798744e-28
Fars2	6.13104586396209e-33	-0.364728	0.642	0.925	1.4918673900779e-28
Acer3	7.16195717593801e-33	-0.396368	0.763	0.963	1.742719039621e-28
Apol7a	7.46394884195653e-33	-1.07174	0.075	0.343	1.81620267171328e-28
Hnrnpa2b1	7.70783563293358e-33	0.653866	0.869	0.987	1.87554764456173e-28
Tshz2	7.7588229945431e-33	-0.51821	0.761	0.96	1.88795439926217e-28
Nucb1	8.61124654747183e-33	-0.337911	0.432	0.726	2.09537462239632e-28
H1f1	8.76542678074844e-33	4.10677	0.137	0.027	2.13289129855952e-28
Uox	9.64643419359926e-33	-1.3732	0.135	0.432	2.34726683232851e-28
Gtse1	1.01117237173038e-32	3.91575	0.067	0.005	2.46048573213153e-28
Anln	1.02267627106609e-32	2.72586	0.299	0.119	2.48847817038512e-28
Cpeb4	1.15513636959778e-32	-0.373399	0.414	0.726	2.81079332814229e-28
1700017B05Rik	1.18881958135683e-32	-0.218477	0.401	0.714	2.89275468731559e-28
Ndel1	1.18931946088097e-32	-0.43734	0.466	0.763	2.89397104416165e-28
Slc34a2	1.36791370311406e-32	-0.800045	0.106	0.402	3.32854441378744e-28
Paqr8	1.44753485052141e-32	-0.866064	0.231	0.515	3.52228655177374e-28
H2ac15	1.57718482041568e-32	4.31033	0.091	0.011	3.83776382351747e-28
Hrob	1.57928586799438e-32	3.74664	0.044	0.001	3.84287630259074e-28
Trip12	1.69525249763e-32	-0.339964	0.802	0.984	4.12505790248308e-28
Ncoa1	1.93707174473001e-32	-0.448795	0.505	0.804	4.71347667645154e-28
Sh3rf1	2.00754273078229e-32	-0.568713	0.813	0.981	4.88495372681254e-28
Skap2	2.7255385388504e-32	-0.458876	0.563	0.845	6.63205292658469e-28
Cblc	3.19217642906262e-32	-0.28144	0.47	0.778	7.76752290483808e-28
Unc13b	3.45187557257999e-32	-0.447968	0.495	0.802	8.3994488307589e-28
Homer2	4.43828170241202e-32	-1.03276	0.143	0.425	1.07996708664792e-27
Pik3c2b	4.86925275460992e-32	-0.495956	0.316	0.606	1.18483527277923e-27
Pbxip1	5.230647893397e-32	-0.571906	0.37	0.66	1.27277355190029e-27
Kmt5b	5.38279951250847e-32	-0.420159	0.526	0.83	1.30979660537869e-27
Fat1	5.41126779872147e-32	-0.29883	0.543	0.836	1.31672379346289e-27
Wdfy3	5.62318295677095e-32	-0.333728	0.586	0.903	1.36828910887108e-27
Rnf38	5.78871153560929e-32	-0.254863	0.534	0.829	1.40856717795981e-27
Lamb3	5.97381952429047e-32	-0.672566	0.36	0.643	1.4536095048456e-27
Prkce	6.24445266278801e-32	-0.411055	0.462	0.775	1.51946266643621e-27
Rab11fip5	6.80431380452867e-32	-0.562916	0.148	0.437	1.65569367805596e-27
Bcar3	6.99102201401168e-32	-0.786503	0.337	0.619	1.70112538666946e-27
Atp11a	7.40249149739094e-32	-0.407385	0.626	0.905	1.80124825606014e-27
Adam10	7.51386932672972e-32	-0.433266	0.765	0.966	1.82834982327314e-27
Arhgef28	8.69438434700762e-32	-0.279151	0.543	0.853	2.11560454315736e-27
Dock4	9.29456143211733e-32	-0.445024	0.455	0.76	2.26164563327711e-27
Plekhb2	9.31908037266273e-32	-0.369753	0.422	0.716	2.26761182708002e-27
Fgd6	9.93605601809039e-32	-0.323284	0.563	0.85	2.41774051088193e-27
Igsf5	1.06098811420341e-31	-0.405347	0.449	0.749	2.58170237829116e-27
Stx8	1.3949396758483e-31	-0.379648	0.526	0.829	3.39430671324167e-27
Tmprss4	1.53112823361928e-31	-0.246232	0.476	0.771	3.7256943308658e-27
Sat1	1.67651511407965e-31	-0.664541	0.827	0.965	4.07946422709002e-27
Tet2	1.72128400554452e-31	-0.156566	0.522	0.819	4.18840037069149e-27
Tmem97	1.92232677580913e-31	2.2581	0.233	0.075	4.67759774357635e-27
Prom1	1.95976171309434e-31	-0.637124	0.751	0.924	4.76868817647245e-27
Mvp	2.44136499811614e-31	-0.709256	0.331	0.622	5.940573449916e-27
Marf1	2.45227337823036e-31	-0.22052	0.622	0.895	5.96711681124793e-27
Pik3r5	2.58309021405196e-31	-1.55331	0.108	0.38	6.28543341785264e-27
Ltbp2	2.67073073058612e-31	-0.889107	0.079	0.358	6.49868908673521e-27
Pole2	2.74330771935176e-31	2.28077	0.208	0.061	6.67529067349863e-27
Cers6	2.74463161021286e-31	-0.483289	0.578	0.85	6.67851209713095e-27
Mcm6	2.75805914305357e-31	2.6421	0.351	0.169	6.71118531279225e-27
Mgat4a	2.98168549029654e-31	-0.441273	0.464	0.75	7.25533530353858e-27
Fam135a	2.99778056315342e-31	-0.363306	0.545	0.823	7.29449944432122e-27
Dsn1	3.22084486588204e-31	2.45346	0.133	0.026	7.83728181215078e-27
Mcm4	3.8382862762165e-31	2.54783	0.38	0.197	9.33970199591761e-27
Prkn	4.04645971730851e-31	-0.691883	0.243	0.542	9.8462504301268e-27
Dlx6os1	4.39956072255802e-31	-0.601697	0.514	0.783	1.07054511062004e-26
Tnip1	4.88028866826421e-31	-0.46913	0.289	0.564	1.18752064164873e-26
Prkca	5.04242746215235e-31	-0.72002	0.297	0.59	1.22697387436553e-26
Pdlim7	5.89736235475226e-31	-0.304783	0.57	0.854	1.43500518178187e-26
Zswim6	6.28842762977138e-31	-0.311867	0.647	0.93	1.53016309515227e-26
Ptprr	6.55034983841699e-31	-0.44667	0.601	0.871	1.59389662618201e-26
Nfkbia	6.6736970015381e-31	-0.797883	0.705	0.908	1.62391069138427e-26
Gpat3	6.82255072065734e-31	-0.376224	0.164	0.455	1.66013126685755e-26
Lig1	7.47499136263298e-31	2.30238	0.391	0.203	1.81888964826948e-26
Npepps	7.89879997683331e-31	-0.384798	0.713	0.958	1.92201499836285e-26
Med15	9.61929808593426e-31	-0.230088	0.493	0.775	2.34066380325038e-26
Spc25	1.25155162686141e-30	2.65601	0.264	0.096	3.04540057364188e-26
Cdk6	1.46167501275993e-30	-0.646027	0.422	0.704	3.55669380854874e-26
Xpr1	1.48813136189577e-30	-0.519712	0.507	0.797	3.62107004290098e-26
Cibar1	1.64825249157549e-30	1.91441	0.229	0.073	4.01069278775065e-26
Fbxl5	1.80650341956741e-30	-0.178142	0.568	0.866	4.39576477083337e-26
Kalrn	1.83158531266859e-30	-1.08275	0.218	0.495	4.45679654131648e-26
Ehf	1.88057285920649e-30	-0.381051	0.576	0.848	4.57599793830716e-26
Rph3al	1.99486220964299e-30	-0.556609	0.38	0.668	4.8540982147243e-26
Map2k4	2.2903128907264e-30	-0.410086	0.636	0.919	5.57301835700456e-26
Bnip3	2.38712267758053e-30	-0.561538	0.146	0.433	5.80858561135671e-26
9530026P05Rik	2.48436902677549e-30	-0.320239	0.486	0.787	6.04521515285279e-26
Nipal2	2.52095085451189e-30	-0.464945	0.393	0.683	6.13422971428379e-26
Atp6v0a2	2.61410801506319e-30	-0.470028	0.48	0.74	6.36090903305326e-26
Ifngr1	2.84839286542041e-30	-0.614321	0.484	0.737	6.93099435942748e-26
Map3k5	2.91098753624707e-30	-0.392782	0.63	0.902	7.08330597195001e-26
Il36g	2.91775391876008e-30	-3.37752	0.029	0.268	7.09977061051891e-26
Adcy6	3.05568882743708e-30	-0.238127	0.455	0.719	7.43540762380265e-26
Neat1	3.72586013189147e-30	-0.472378	0.746	0.953	9.06613545893152e-26
Arhgap21	3.73763090643767e-30	-0.36466	0.636	0.912	9.09477728463478e-26
Nectin2	3.77264066568184e-30	-0.389152	0.497	0.771	9.17996653180362e-26
Unc93b1	3.84691208200299e-30	-0.421527	0.283	0.558	9.36069116913788e-26
Litaf	4.19013744110518e-30	-0.560462	0.478	0.748	1.01958614354412e-25
Adam8	4.65657155063226e-30	-1.55823	0.052	0.301	1.13308355541535e-25
Arih2	4.85373644372557e-30	-0.402229	0.416	0.711	1.18105968885174e-25
Lurap1l	4.86622907607076e-30	-0.447573	0.462	0.75	1.1840995210803e-25
Stil	4.88398396706695e-30	2.18654	0.185	0.051	1.1884198187064e-25
Tnik	4.92550465104453e-30	-0.450999	0.58	0.853	1.19852304673867e-25
Parp9	4.95535327649587e-30	-0.36238	0.491	0.773	1.20578611276974e-25
Ptprk	5.19787261241075e-30	-0.267996	0.794	0.98	1.26479834277791e-25
H2bc11	5.23006913176403e-30	4.02945	0.083	0.01	1.27263272183214e-25
Spata13	5.53961639134173e-30	-0.324909	0.405	0.688	1.34795485650518e-25
Spag9	5.54882398737003e-30	-0.336642	0.669	0.922	1.35019534084675e-25
Rhoq	5.97269205972385e-30	-0.411018	0.426	0.729	1.4533351588926e-25
Man1a	6.14668398826561e-30	-0.517095	0.283	0.579	1.49567261486467e-25
Ccnt2	6.2289578017742e-30	-0.345557	0.491	0.783	1.51569230190572e-25
Mal2	6.6945389236561e-30	-0.425684	0.721	0.931	1.62898215629324e-25
Ctif	8.35560645091864e-30	-0.560834	0.256	0.537	2.03316971770203e-25
Cobll1	8.64979778344103e-30	-0.690041	0.31	0.579	2.1047552946447e-25
Adam28	9.57342196455739e-30	-0.814121	0.252	0.545	2.32950076663575e-25
Col4a5	9.63103399394203e-30	-0.36076	0.368	0.66	2.34351950174591e-25
Sh3kbp1	1.01344756420357e-29	-0.356586	0.568	0.837	2.46602195797654e-25
Pias1	1.03724275909309e-29	-0.234897	0.528	0.801	2.52392280570122e-25
Siva1	1.04291212469125e-29	2.03669	0.343	0.156	2.53771807301122e-25
Znrf2	1.04874860054388e-29	-0.499565	0.505	0.796	2.55191996970343e-25
Arhgef38	1.08621243520494e-29	-0.300821	0.661	0.921	2.64308071858418e-25
Vps13d	1.11308990686582e-29	-0.15739	0.53	0.812	2.7084816703766e-25
Wdr47	1.11536522849212e-29	-1.22482	0.108	0.368	2.71401821048987e-25
Rab3gap1	1.21038781658673e-29	-0.454381	0.462	0.749	2.9452366741005e-25
Slc44a1	1.22458021732854e-29	-0.237445	0.609	0.869	2.97977104282554e-25
Mxi1	1.27637761585024e-29	-0.212811	0.395	0.695	3.10580965264838e-25
App	1.30033753956128e-29	-0.367606	0.825	0.987	3.16411133501446e-25
Tmem45b	1.37542872330866e-29	-0.438438	0.692	0.93	3.34683071242696e-25
Bach1	1.39335970692473e-29	-0.290699	0.262	0.546	3.39046217485993e-25
Bhlhe40	1.47135292931393e-29	-0.381446	0.69	0.927	3.58024308289958e-25
Cdc7	1.49293952891858e-29	2.25763	0.164	0.041	3.63276975571757e-25
Mbnl2	1.5360578226082e-29	-0.327721	0.763	0.97	3.73768949975254e-25
Nod2	1.55858062256044e-29	-0.801824	0.094	0.351	3.79249422887633e-25
Trpm4	1.69398175439973e-29	-0.128278	0.266	0.547	4.12196580298086e-25
Farp1	1.73727881619971e-29	-0.407845	0.699	0.947	4.22732054345874e-25
Rras2	1.78259348534836e-29	-0.341311	0.642	0.89	4.33758472789816e-25
Lif	2.17452872194837e-29	-2.41217	0.089	0.335	5.29128073911698e-25
Trip10	2.27502660152675e-29	-0.350283	0.503	0.793	5.53582222949505e-25
Ctsa	2.43867215004404e-29	-0.473495	0.368	0.638	5.93402094270217e-25
Ncam1	2.50676309873235e-29	-0.531554	0.723	0.947	6.09970664814542e-25
Ccnl1	2.58246697099577e-29	-0.392495	0.649	0.935	6.28391688052401e-25
Stx7	2.58473748916686e-29	-0.185261	0.48	0.762	6.28944173238971e-25
Agfg1	2.70072092920785e-29	-0.380278	0.499	0.793	6.57166423704147e-25
Pak1	2.76965717144262e-29	-0.543738	0.443	0.715	6.73940679527134e-25
Mms22l	2.80699323362414e-29	2.39659	0.316	0.14	6.83025663537762e-25
Plekha2	2.91133929187354e-29	-0.500402	0.455	0.739	7.08416189891589e-25
Asap1	3.06046102891431e-29	-0.459687	0.676	0.927	7.4470198216572e-25
Gab2	3.28887389865468e-29	-0.481044	0.443	0.715	8.00281685759644e-25
Inpp5a	3.93435053074961e-29	-0.297275	0.324	0.593	9.57345514647303e-25
Btg1	4.06923380847582e-29	-0.213152	0.669	0.914	9.9016666261642e-25
Myo1e	4.09196514782644e-29	-0.657366	0.632	0.899	9.95697879420607e-25
Rapgef2	4.34186334970995e-29	-0.591377	0.617	0.902	1.05650560888492e-24
Atf3	4.38063559728016e-29	-1.3299	0.177	0.451	1.06594005988618e-24
Stk25	4.39412378084429e-29	-0.405297	0.451	0.725	1.06922213959284e-24
Adgrg7	4.51172618420791e-29	-0.726817	0.407	0.705	1.09783833240331e-24
Ptprh	4.70858322026687e-29	-0.734526	0.146	0.414	1.14573955498754e-24
Lnpep	4.72548922611704e-29	-0.318379	0.644	0.904	1.14985329339106e-24
Gm42716	5.18199903573203e-29	-0.99107	0.121	0.39	1.26093582536467e-24
Spp1	5.29001532348571e-29	-1.08323	0.389	0.676	1.28721942866378e-24
Cyld	5.672446413463e-29	-0.182848	0.507	0.77	1.38027638578795e-24
Ubap1	5.78582045762581e-29	-0.325834	0.374	0.639	1.40786369195409e-24
Arl15	6.02237293073623e-29	-0.448483	0.775	0.974	1.46542400523605e-24
Lamp2	6.28611794580194e-29	-0.354738	0.757	0.97	1.52960107975199e-24
Rad51b	6.55278680363146e-29	2.32869	0.358	0.173	1.59448961292764e-24
Sash1	6.76916852839627e-29	-0.323021	0.478	0.774	1.64714177801466e-24
Tuft1	6.88450978828984e-29	-0.724594	0.383	0.648	1.67520776678457e-24
Crebrf	7.37848203303e-29	-0.300965	0.268	0.55	1.79540603309719e-24
Trim7	7.6428516023577e-29	-0.614354	0.062	0.316	1.8597350804017e-24
Ap3b1	9.35995147634799e-29	-0.308709	0.653	0.93	2.27755699273976e-24
Sgo2a	9.92818530295987e-29	2.5705	0.229	0.079	2.41582532976923e-24
Scamp5	9.93518411894537e-29	-0.71346	0.121	0.376	2.41752835166298e-24
Babam2	1.02664063191612e-28	-0.212522	0.563	0.849	2.4981246496415e-24
Rps6ka1	1.08618099926676e-28	-0.205531	0.549	0.818	2.64300422551581e-24
Svil	1.13425395779534e-28	-0.344131	0.593	0.873	2.75998015550339e-24
Esyt2	1.15021779458493e-28	-0.532662	0.593	0.866	2.7988249595635e-24
Tnip2	1.17095983886705e-28	-0.239333	0.277	0.541	2.84929657591519e-24
Stim2	1.18234604963724e-28	-0.299126	0.595	0.881	2.8770026425823e-24
Gpcpd1	1.31251675403049e-28	-0.369629	0.773	0.97	3.19374701758238e-24
Bcl3	1.31875716209081e-28	-0.300263	0.299	0.589	3.20893180251557e-24
Igf2bp2	1.38241145606214e-28	-0.281194	0.701	0.944	3.36382179603601e-24
Capg	1.53165168878212e-28	-0.421598	0.47	0.744	3.72696805431353e-24
Smurf1	1.5574082812838e-28	-0.400421	0.505	0.807	3.78964157084786e-24
Pnrc1	1.67066160269741e-28	-0.404875	0.649	0.897	4.0652208778436e-24
Ndfip2	1.71893893851244e-28	-0.468218	0.522	0.794	4.18269411908233e-24
Camk2d	1.73262810232362e-28	-0.261178	0.439	0.729	4.21600396138408e-24
Baz1a	1.74309867877214e-28	-0.546592	0.642	0.919	4.24148201505625e-24
Arhgap29	1.76299266679559e-28	-0.3322	0.599	0.868	4.28989005611372e-24
Smpdl3a	1.85713418316002e-28	-0.432414	0.476	0.719	4.51896460788327e-24
Tgm2	1.88825405846283e-28	-0.677772	0.682	0.906	4.5946886004576e-24
Gm15283	1.98407886766339e-28	-0.520858	0.237	0.528	4.82785910868534e-24
Cert1	2.04043297952121e-28	-0.234846	0.551	0.849	4.96498556906897e-24
Hnf1b	2.05372871370806e-28	-0.250676	0.324	0.593	4.99733807906582e-24
Eepd1	2.09467086946401e-28	-0.171408	0.183	0.456	5.09696262666677e-24
Bcl2l11	2.11358980351273e-28	-0.503538	0.299	0.569	5.14299806888753e-24
Azi2	2.12512550732955e-28	-0.327907	0.511	0.793	5.17106789698499e-24
Pxk	2.1600509877816e-28	-0.349252	0.399	0.674	5.25605206856898e-24
Tpk1	2.21439517748071e-28	-0.185649	0.326	0.621	5.38828778536381e-24
Anks1	2.22496169052344e-28	-0.317375	0.476	0.772	5.41399928155068e-24
Rerg	2.27626418174793e-28	-1.22852	0.085	0.345	5.53883363344724e-24
Cdh1	2.32769034122343e-28	-0.545353	0.79	0.981	5.66396890729897e-24
Foxo3	2.32776486851102e-28	-0.168736	0.493	0.787	5.66415025454787e-24
H2bc9	2.47244394226576e-28	5.60909	0.044	0.002	6.01619784471526e-24
Phf21a	2.51768548088737e-28	-0.398607	0.703	0.929	6.12628408064323e-24
Frk	2.5947456971101e-28	-0.50582	0.728	0.96	6.313794704778e-24
Btbd9	2.7905092918616e-28	-0.34613	0.796	0.983	6.79014625988684e-24
Myo10	2.88124735707776e-28	-0.490795	0.696	0.953	7.0109391939773e-24
Wipf2	3.18357710445245e-28	-0.45875	0.418	0.717	7.74659816826416e-24
Rnf19a	3.19698719383316e-28	-0.332576	0.541	0.81	7.77922893875423e-24
Tspan33	3.5614547387835e-28	-0.167985	0.306	0.571	8.66608781588189e-24
Efna5	3.58960856341478e-28	-0.482405	0.686	0.921	8.7345945173572e-24
Nmral1	3.6262396281856e-28	2.13669	0.239	0.082	8.82372888726403e-24
Ptma	3.82829039687018e-28	0.604855	0.915	0.983	9.31537902270421e-24
Slit2	3.87057512576936e-28	-0.547694	0.443	0.766	9.41827045353458e-24
Slc44a4	3.91048816423649e-28	-0.316313	0.441	0.717	9.51539085003665e-24
Oas2	4.00110971195102e-28	-0.491833	0.391	0.696	9.73590026209043e-24
Os9	4.16422278388855e-28	-0.387752	0.509	0.772	1.0132803300036e-23
Tbc1d9	4.42743703719643e-28	-0.715243	0.133	0.395	1.07732825426101e-23
Cast	4.57384838467876e-28	-0.327288	0.551	0.837	1.11295452744388e-23
Shisa5	4.72412019652789e-28	-0.35676	0.453	0.72	1.14952016742113e-23
Zfp292	5.17270854588662e-28	-0.266212	0.647	0.921	1.25867517047059e-23
Maff	5.20503184487598e-28	-0.632287	0.089	0.342	1.26654039881367e-23
Cep350	5.51158020409365e-28	-0.254687	0.605	0.886	1.34113281106211e-23
Plekha7	5.67141314524606e-28	-0.431683	0.611	0.877	1.38002496063272e-23
Etv5	5.89490748292642e-28	1.58409	0.291	0.113	1.43440783782049e-23
Hoxb3	6.18944812238433e-28	-0.204602	0.393	0.671	1.50607841161978e-23
Clic5	6.21313971882187e-28	-0.164049	0.193	0.482	1.51184328778093e-23
Cyth1	6.78913895828433e-28	-0.261439	0.422	0.709	1.65200118271933e-23
Irf1	6.79598722213228e-28	-0.135955	0.437	0.712	1.65366757076145e-23
Ets2	7.42490291783185e-28	-0.381077	0.615	0.893	1.80670162699602e-23
Endod1	8.5721371346179e-28	-0.341774	0.472	0.733	2.08585812896657e-23
Tuba1b	8.64499974855651e-28	2.26748	0.505	0.385	2.10358778881626e-23
Vps37b	8.70574500529442e-28	-0.693724	0.331	0.584	2.11836893213829e-23
Nlgn2	8.83714555757607e-28	-0.690684	0.075	0.322	2.15034262852499e-23
Insr	9.51993520075179e-28	-0.469544	0.38	0.668	2.31648583239893e-23
Ppp1r12a	9.69182320422149e-28	-0.329432	0.74	0.966	2.35831134028322e-23
Hdac8	9.84469884085037e-28	-0.39064	0.455	0.729	2.39551056894412e-23
Aebp2	9.92853615309176e-28	-0.2756	0.52	0.799	2.41591070213182e-23
Fhip1a	9.94512690939906e-28	-0.310578	0.202	0.469	2.41994773086407e-23
Nos1ap	1.04621114707411e-27	-0.327409	0.588	0.867	2.54574558417544e-23
Dock11	1.08818044914771e-27	-0.220162	0.661	0.872	2.64786948691111e-23
Map1lc3b	1.14034626608034e-27	-0.249481	0.476	0.735	2.77480456925329e-23
Ppp2r3a	1.1417754110335e-27	-0.237915	0.719	0.94	2.77828210766781e-23
Kdm6b	1.14785655403053e-27	-0.322076	0.374	0.657	2.79307935292249e-23
Fbxo34	1.150156191712e-27	-0.264187	0.447	0.724	2.79867506129281e-23
Lamc1	1.15708454016178e-27	-0.454906	0.561	0.829	2.81553381157566e-23
Eeig1	1.29244349254191e-27	-0.2072	0.597	0.85	3.14490275040223e-23
Prkaa1	1.51277548972613e-27	-0.248202	0.48	0.752	3.68103659915058e-23
Abcc1	1.5776953041735e-27	-0.525723	0.416	0.695	3.83900598364537e-23
Ogt	1.67054372417417e-27	-0.268568	0.674	0.936	4.06493404403302e-23
Cenps	1.68815316577521e-27	2.20002	0.135	0.03	4.10778309828081e-23
Wdfy1	1.7084892187221e-27	-0.598112	0.308	0.579	4.15726681591648e-23
Gprc5c	1.83015555554044e-27	-0.481298	0.301	0.568	4.45331751329656e-23
Rab11fip1	2.12160917239211e-27	-0.285141	0.647	0.893	5.16251159918173e-23
H2-T23	2.41580421523516e-27	-0.603475	0.121	0.374	5.87837639693172e-23
Sertad2	2.4892140259002e-27	-0.476507	0.422	0.699	6.05700448922294e-23
Tbck	2.5665751850664e-27	-0.408005	0.383	0.656	6.24524739782206e-23
Niban1	3.15139866418712e-27	-0.393918	0.366	0.629	7.66829836956652e-23
Arhgef4	3.25899022027086e-27	-0.441623	0.62	0.877	7.93010090298507e-23
Fbxw7	3.3384456914452e-27	-0.395206	0.561	0.851	8.1234399009936e-23
Abtb2	3.46725291439615e-27	-1.11289	0.358	0.615	8.43686651660015e-23
Vwa5a	3.52785541376363e-27	-0.360595	0.353	0.623	8.58433057831103e-23
Fto	3.54148919812003e-27	-0.215191	0.57	0.858	8.61750566578546e-23
Plekhg3	3.57796476837624e-27	-0.308657	0.613	0.887	8.70626167088991e-23
Atp6v1b2	3.66019528635858e-27	-0.366308	0.524	0.783	8.90635319029634e-23
Slc28a3	3.66288831173024e-27	-0.527474	0.557	0.815	8.9129061289332e-23
Stx6	3.7498434448315e-27	-0.394867	0.378	0.641	9.12449405430848e-23
Arhgap17	3.96095762111821e-27	-0.35825	0.489	0.777	9.63819817946694e-23
Fmn1	4.1374323105652e-27	-0.216014	0.478	0.769	1.00676140412983e-22
2700099C18Rik	4.29307388462095e-27	2.27086	0.119	0.024	1.04463366834481e-22
N4bp1	4.49894011809609e-27	-0.380478	0.505	0.77	1.09472709893632e-22
Tacc2	4.68705844843521e-27	-0.337394	0.582	0.858	1.14050193225774e-22
Ptpn12	4.69134643689898e-27	-0.305293	0.568	0.855	1.14154532849063e-22
Suv39h1	5.05071250065353e-27	2.1717	0.249	0.09	1.22898987278402e-22
Ephb2	5.1890147333453e-27	-0.349256	0.694	0.926	1.26264295506491e-22
Pik3c2a	5.39508539342641e-27	-0.367863	0.78	0.984	1.31278612878245e-22
Cst3	5.48474783390549e-27	-0.514756	0.482	0.733	1.33460369042422e-22
Trp53inp1	5.50856289365485e-27	-0.768152	0.328	0.6	1.34039860891303e-22
Mxd3	5.59942991882799e-27	6.29513	0.031	0	1.36250928214841e-22
Pparg	5.75336000837193e-27	-1.27017	0.091	0.339	1.39996509083714e-22
Tnrc18	6.68651841428484e-27	-0.176812	0.659	0.919	1.62703052574793e-22
Optn	6.8423903568415e-27	-0.42437	0.285	0.549	1.66495884553024e-22
H2bc14	7.48705970663876e-27	4.54087	0.06	0.005	1.82182623841641e-22
Pam	7.54505804779488e-27	-0.376693	0.805	0.968	1.83593897476993e-22
Gfpt1	7.79706860722725e-27	-0.202341	0.647	0.903	1.89726070419661e-22
Itpr3	7.85050877698695e-27	-0.113116	0.511	0.779	1.91026430070423e-22
Ier3	7.8984102221424e-27	-0.776882	0.669	0.892	1.92192015935391e-22
Pitpnc1	8.07816015382213e-27	-0.369041	0.605	0.867	1.96565871022954e-22
Alpl	8.27158322631987e-27	-0.492995	0.426	0.716	2.01272434646041e-22
Pla2g12a	8.34008455924039e-27	-0.625626	0.464	0.707	2.02939277579997e-22
Zc3hav1	8.45854048422414e-27	-0.42304	0.543	0.829	2.05821665602626e-22
Cobl	8.50116222605e-27	-0.517642	0.536	0.802	2.06858780446475e-22
Rab3gap2	8.98116925163735e-27	-0.266045	0.439	0.71	2.18538791400092e-22
Stam2	9.49075348005206e-27	-0.394614	0.449	0.728	2.30938504430107e-22
Haspin	9.54638675651471e-27	2.58458	0.116	0.024	2.32292228946273e-22
Hmgb1	1.02194472380423e-26	0.823995	0.79	0.94	2.48669809643283e-22
Pik3ca	1.08032586278216e-26	-0.160132	0.474	0.751	2.62875692190783e-22
Phf14	1.1155272209886e-26	-0.239063	0.726	0.948	2.71441238683157e-22
Npc1	1.15247850277497e-26	-0.283676	0.393	0.662	2.80432594080233e-22
Dcaf8	1.15282986340786e-26	-0.280886	0.607	0.879	2.80518090663034e-22
Dleu2	1.19979542832087e-26	-0.439052	0.686	0.916	2.91946221573317e-22
Plekha5	1.21968110417035e-26	-0.335145	0.574	0.852	2.96785003077772e-22
Tbl1xr1	1.4567061962739e-26	-0.254127	0.672	0.931	3.54460318739328e-22
Lcorl	1.49010622571958e-26	-0.276317	0.738	0.96	3.62587547904346e-22
Cd14	1.51126599897119e-26	-0.516696	0.426	0.689	3.67736355529659e-22
Map4k4	1.84022997553129e-26	-0.249543	0.674	0.931	4.4778315994603e-22
Cog5	2.01093427713212e-26	-0.248447	0.653	0.928	4.89320637654558e-22
Ralgds	2.03558868408793e-26	-0.352855	0.31	0.588	4.95319794499117e-22
Lama5	2.13336630859266e-26	-0.279745	0.59	0.879	5.19112023869851e-22
Chd7	2.21085167614708e-26	-0.14939	0.599	0.879	5.37966538356868e-22
Cdkn1a	2.26227490909123e-26	-0.764188	0.287	0.535	5.5047935362917e-22
Mgrn1	2.30438657016559e-26	-0.504082	0.277	0.541	5.60726384118392e-22
Trim26	2.42354642320337e-26	-0.313945	0.439	0.711	5.89721551158077e-22
Tor1aip1	2.47044203860405e-26	-0.25352	0.53	0.799	6.01132661253523e-22
Sik2	2.52323138273112e-26	-0.503097	0.47	0.724	6.13977892359964e-22
Fam234a	2.67756102278018e-26	-0.576515	0.314	0.563	6.515309236731e-22
Sprr2f	2.77460891840846e-26	-0.680677	0.85	0.936	6.7514558811633e-22
Ncoa6	2.8147737769633e-26	-0.185868	0.524	0.819	6.84918903148481e-22
Ccnf	2.89406828074065e-26	2.97433	0.11	0.022	7.04213634752622e-22
Micall1	3.11955846276874e-26	-0.66247	0.333	0.564	7.59082160745517e-22
Acvr1b	3.28596793244231e-26	-0.387746	0.376	0.633	7.99574577001187e-22
Dlgap4	3.39181453934828e-26	-0.250983	0.356	0.638	8.25330231859616e-22
Etv6	3.52047410629643e-26	-0.407359	0.746	0.975	8.56636964285111e-22
Lpar1	3.58486471090059e-26	-0.480325	0.561	0.842	8.72305130103441e-22
Gmeb2	3.59973293178879e-26	-0.396861	0.293	0.571	8.75923014292165e-22
2200002D01Rik	3.64043191812622e-26	-0.359577	0.32	0.577	8.85826298637653e-22
Zfand5	3.64320252256074e-26	-0.604614	0.807	0.976	8.86500469814704e-22
Egln1	3.73107557827319e-26	-0.386911	0.686	0.934	9.07882620461216e-22
Dapp1	3.7444665454556e-26	-0.285479	0.486	0.761	9.11141044505711e-22
H2bc24	3.8164735434838e-26	2.89222	0.073	0.009	9.28662507335913e-22
Zmym2	3.90318503566513e-26	-0.302567	0.603	0.887	9.49762014728397e-22
Cp	4.66897297607613e-26	-0.491808	0.389	0.661	1.13610119426861e-21
Gm35019	4.69802366233546e-26	-0.330744	0.593	0.85	1.14317009775609e-21
Asxl2	4.76277668681697e-26	-0.276322	0.657	0.916	1.15892645120317e-21
Slc29a1	4.80950339843394e-26	3.99599	0.048	0.003	1.17029646194093e-21
Parp8	4.81399087844156e-26	-0.320362	0.42	0.703	1.17138840045119e-21
Samd12	5.09715045602037e-26	-0.508579	0.782	0.956	1.24028962046344e-21
Clip1	5.21567708119422e-26	-0.240234	0.443	0.696	1.26913070416699e-21
Akap13	5.47497082589848e-26	-0.265677	0.919	0.995	1.33222465106588e-21
Igsf9b	5.51198517717637e-26	-0.706304	0.098	0.339	1.34123135316233e-21
Ankrd37	5.79836658894443e-26	-0.399448	0.181	0.451	1.41091654208785e-21
Crk	6.01317923210429e-26	-0.248855	0.543	0.824	1.46318690254794e-21
Baz2b	6.69641849060417e-26	-0.271186	0.705	0.961	1.62943951131871e-21
Marchf7	6.80100417555121e-26	-0.256628	0.595	0.878	1.65488834603688e-21
Zfp809	6.81367155053297e-26	-0.255846	0.497	0.756	1.65797069839119e-21
Npm1	6.83152417654824e-26	0.873745	0.748	0.899	1.66231477787948e-21
Pals1	6.86807496281787e-26	-0.184248	0.62	0.89	1.67120868070247e-21
Asah2	6.92347782313944e-26	-0.475014	0.222	0.479	1.68468985870452e-21
Vti1a	7.37970621483303e-26	-0.392247	0.636	0.918	1.79570391325532e-21
Slc41a2	7.70756912803241e-26	-0.601364	0.096	0.334	1.87548279592413e-21
Kdm3b	8.27463271795604e-26	-0.169308	0.563	0.858	2.01346637926024e-21
Mis18bp1	8.27952454639813e-26	2.86661	0.16	0.045	2.01465670787506e-21
Clca3b	8.61419749961983e-26	-1.39196	0.121	0.381	2.09609267758249e-21
Mbd5	8.8537379522407e-26	-0.223483	0.663	0.924	2.15438005591873e-21
Trp53i11	9.24504782447195e-26	-0.896949	0.127	0.366	2.24959748712876e-21
Kdm5c	9.70256348621105e-26	-0.152984	0.572	0.844	2.36092477309974e-21
Ctsh	1.03561517300954e-25	-0.420675	0.551	0.809	2.51996240048412e-21
Firre	1.1578285288355e-25	0.100599	0.451	0.739	2.81734415921542e-21
Lrrfip2	1.17247196254643e-25	-0.492229	0.478	0.734	2.85297602646423e-21
Slc11a2	1.30838281486458e-25	-0.475069	0.164	0.411	3.18368790340999e-21
Ahnak	1.31086150043098e-25	-0.262139	0.875	0.983	3.18971928899871e-21
Cgas	1.34248962889528e-25	2.38301	0.162	0.046	3.26668001399089e-21
Gm20186	1.44693789906141e-25	-0.614019	0.389	0.637	3.52083398978614e-21
Qrich1	1.45592608983559e-25	-0.234261	0.495	0.751	3.54270495439694e-21
Dctn4	1.5870279506726e-25	-0.227117	0.503	0.779	3.86171511237164e-21
Rhou	1.60013365891123e-25	-0.39043	0.22	0.471	3.89360523222869e-21
Stx16	1.62092021097167e-25	-0.153075	0.516	0.783	3.94418514935737e-21
Junos	1.64362392351916e-25	-0.479001	0.468	0.745	3.99943009309916e-21
Dram2	1.67778127610696e-25	-0.515416	0.326	0.594	4.08254517915108e-21
Pex14	1.74581879867746e-25	-0.45686	0.428	0.692	4.24810088282186e-21
Hacd2	1.82627237543148e-25	-0.726387	0.422	0.659	4.44386857113741e-21
Ascc3	1.83011085195057e-25	-0.278826	0.742	0.96	4.45320873605133e-21
Mycn	1.87186011332517e-25	-0.290072	0.38	0.662	4.55479721375413e-21
Cks2	1.8875290259623e-25	2.46265	0.432	0.271	4.59292437887406e-21
Ank3	1.91820430248221e-25	-0.400377	0.58	0.864	4.66756652922996e-21
Zbtb10	1.9241681299788e-25	-0.710324	0.366	0.616	4.68207831067742e-21
Plpp1	1.93016646964198e-25	-0.650146	0.21	0.471	4.69667407057983e-21
Egfr	1.98271595718487e-25	-0.32499	0.499	0.774	4.82454273861795e-21
Stat2	1.99798588242709e-25	-0.170944	0.385	0.674	4.86169904770984e-21
Gm56577	2.01473950601429e-25	2.0564	0.141	0.035	4.90246563998457e-21
Cflar	2.02400093970716e-25	-0.253213	0.432	0.709	4.92500148658943e-21
Aftph	2.08557590665946e-25	-0.179151	0.617	0.897	5.07483185367445e-21
Ly6e	2.19422812859426e-25	-0.385786	0.705	0.921	5.33921530530842e-21
Creb5	2.28844048189719e-25	-1.20891	0.094	0.33	5.56846222460043e-21
Kat6b	2.34584276644693e-25	-0.226555	0.491	0.766	5.70813920359531e-21
Cenpn	2.49412607654044e-25	2.44449	0.079	0.011	6.06895698204584e-21
Fam13b	2.49888298226175e-25	-0.283052	0.534	0.824	6.08053196073753e-21
Fhl2	2.67778319914773e-25	-1.52367	0.121	0.366	6.51584985848617e-21
Cdkn2c	2.69048420810632e-25	3.11744	0.104	0.02	6.54675522358511e-21
Pmf1	2.96664167766934e-25	1.81487	0.262	0.104	7.2187291942728e-21
Trp53bp2	3.03459694989427e-25	-0.244787	0.603	0.857	7.38408475817772e-21
Noxo1	3.08432835715139e-25	-0.817978	0.062	0.289	7.50509619145648e-21
Pkp2	3.10268785382452e-25	-0.188665	0.395	0.673	7.5497703547112e-21
Lpin2	3.10353910824807e-25	-0.868446	0.343	0.603	7.55184171210003e-21
Paox	3.21522994779221e-25	-0.273957	0.518	0.785	7.82361903196278e-21
Tmbim1	3.40156661890214e-25	-0.349015	0.378	0.641	8.27703205377459e-21
Cyp2j6	3.77535956123292e-25	-0.309472	0.252	0.522	9.18658242034807e-21
Brwd3	3.85421856509563e-25	-0.355836	0.472	0.753	9.3784700344472e-21
Gch1	4.19113514660878e-25	-0.125775	0.231	0.506	1.01982891522431e-20
Scnn1b	4.26882675164499e-25	-0.81506	0.062	0.289	1.03873361347777e-20
Dip2c	4.29456549615785e-25	-0.33536	0.686	0.937	1.04499662218009e-20
Zfp710	4.56606271332374e-25	-0.39936	0.399	0.667	1.11106004003307e-20
Ppm1b	4.79779523192409e-25	-0.214373	0.462	0.738	1.16744751378409e-20
Ikbke	4.80016140048755e-25	-0.575698	0.164	0.402	1.16802327358064e-20
Rhoc	4.81447910272639e-25	-0.154273	0.447	0.701	1.17150720006641e-20
Dip2a	4.89571110105434e-25	-0.415671	0.306	0.568	1.19127338221955e-20
Pmaip1	5.07854306177841e-25	-0.595499	0.343	0.582	1.23576188322254e-20
Rala	5.31729930806986e-25	-0.16238	0.628	0.892	1.29385844063264e-20
Hoxb5	5.51206611290029e-25	-0.15271	0.243	0.496	1.34125104725203e-20
Synrg	6.33070298544412e-25	-0.363227	0.545	0.821	1.54044995744812e-20
Syne2	6.67970226554297e-25	-0.188439	0.881	0.99	1.62537195227457e-20
Malat1	7.3813315317983e-25	-0.206574	0.992	1	1.79609940163248e-20
4930523C07Rik	7.48935125682283e-25	-0.423567	0.335	0.595	1.8223838413227e-20
Hnrnpab	7.51682358161277e-25	0.709726	0.759	0.92	1.82906868211384e-20
Aff1	7.64008226501713e-25	-0.438618	0.586	0.853	1.85906121754662e-20
Acot9	7.8086137447092e-25	-0.656382	0.328	0.574	1.90006998250009e-20
Daam1	8.75098659782677e-25	-0.2359	0.534	0.815	2.12937756884919e-20
Vopp1	9.51048616131366e-25	-0.481047	0.279	0.535	2.31418659763245e-20
Sbno2	9.53491735237656e-25	-0.302366	0.493	0.752	2.32013143935379e-20
Mga	9.56842553240589e-25	-0.267881	0.584	0.842	2.32828498480033e-20
Epb41l5	9.5713702648819e-25	-0.364961	0.459	0.736	2.32900152655371e-20
Fbxl3	1.07806358301313e-24	-0.246842	0.37	0.627	2.62325211654584e-20
Kif16b	1.15980934127106e-24	-0.253722	0.599	0.885	2.82216407011487e-20
Myo3b	1.18024684404903e-24	-0.497463	0.742	0.96	2.87189464562449e-20
Wdr7	1.21178969343382e-24	-0.3976	0.256	0.51	2.94864786103252e-20
Tmcc1	1.24607403930312e-24	-0.279813	0.609	0.884	3.03207195983628e-20
H2bc13	1.25835446275173e-24	3.38077	0.056	0.005	3.06195391421378e-20
Kifc5b	1.30859436251584e-24	2.84146	0.073	0.01	3.1842026623098e-20
Dop1b	1.30941478697725e-24	-0.245809	0.401	0.669	3.18619900115175e-20
Rel	1.44312954682109e-24	-0.306343	0.393	0.646	3.51156712627976e-20
Phactr1	1.60215558418739e-24	-0.697898	0.266	0.522	3.89852518300317e-20
Gprc5a	1.70506641563338e-24	-1.08904	0.264	0.493	4.14893810916069e-20
Cxadr	1.74497613488989e-24	-0.179289	0.565	0.84	4.24605042902757e-20
Spopl	1.78028201448926e-24	-0.342323	0.491	0.755	4.33196022585672e-20
Map3k1	1.83520705610806e-24	-0.203302	0.634	0.872	4.46560932962774e-20
Pdxk	1.85771776583438e-24	-0.267598	0.514	0.771	4.52038463960479e-20
Ambra1	1.97429071808962e-24	-0.243681	0.576	0.838	4.80404160432748e-20
Armh3	2.12610347732296e-24	-0.288275	0.399	0.666	5.17344759136995e-20
Acvr1	2.22205933393218e-24	-0.251173	0.503	0.765	5.40693697725717e-20
Spaca6	2.24371993246677e-24	-0.197031	0.235	0.489	5.45964371167139e-20
Stx3	2.38198032641963e-24	-0.381838	0.299	0.557	5.79607272827688e-20
Vps4b	2.46634852693425e-24	-0.248196	0.599	0.88	6.00136587058912e-20
Fer1l4	2.59567115303617e-24	-0.434524	0.208	0.458	6.31604661668292e-20
Rasa2	2.61288915219603e-24	-0.16823	0.57	0.86	6.3579431740386e-20
Lmtk2	2.65988350399826e-24	-0.445812	0.522	0.816	6.47229453027897e-20
Pxdn	2.70188077793774e-24	-0.381793	0.464	0.719	6.57448649695591e-20
Itch	2.85469907430258e-24	-0.270041	0.721	0.95	6.94633925750047e-20
Sptlc2	2.88294956476695e-24	-0.313423	0.603	0.892	7.01508117594742e-20
H2ac4	2.93511336483864e-24	3.43244	0.168	0.052	7.14201135066186e-20
Fbxo11	3.04194834034367e-24	-0.198643	0.711	0.94	7.40197289655825e-20
Mtus1	3.1105244697832e-24	-0.161898	0.738	0.955	7.56883919232347e-20
Nav3	3.1337985086358e-24	-0.477664	0.148	0.401	7.62547191106349e-20
Ier5	3.222144672986e-24	-0.301072	0.181	0.427	7.84044463277684e-20
Zfp609	3.24852111681009e-24	-0.276041	0.561	0.829	7.90462643353398e-20
Rps12	3.26910603507888e-24	0.46324	0.832	0.962	7.95471571515745e-20
Cmtm4	3.40818352801659e-24	-0.253626	0.414	0.671	8.29313297872278e-20
Bsdc1	3.57160431855861e-24	-0.349795	0.451	0.724	8.69078478834866e-20
Clca3a2	3.57533072365247e-24	-1.52967	0.119	0.372	8.69985224986355e-20
Micu2	3.83209850234076e-24	-0.256981	0.565	0.838	9.32464528574577e-20
Lrrc1	3.84127357372998e-24	-0.265648	0.474	0.724	9.34697098695717e-20
Pcmtd1	4.30354211152278e-24	-0.145265	0.491	0.771	1.04718090199684e-19
Cmip	4.37949584340247e-24	-0.463102	0.686	0.961	1.06566272357512e-19
Arhgap19	4.3830492777652e-24	2.5418	0.137	0.036	1.06652738075861e-19
Rasal2	4.67524152543494e-24	-0.247116	0.528	0.781	1.13762652038408e-19
Dennd4c	4.69755799567227e-24	-0.182183	0.655	0.905	1.14305678708693e-19
Micall2	4.70742437859079e-24	-0.525528	0.241	0.478	1.1454575740425e-19
Mylip	4.81731131082627e-24	-0.145477	0.312	0.574	1.17219636126336e-19
Tor1aip2	5.23724968436962e-24	-0.213861	0.632	0.891	1.27437996569766e-19
Sipa1l1	5.26165107828814e-24	-0.386962	0.815	0.982	1.28031755687985e-19
Fndc1	5.34534560199823e-24	-0.38114	0.443	0.68	1.30068294533423e-19
Arel1	5.49748345217293e-24	-0.656809	0.297	0.537	1.33770264841724e-19
Tnfrsf1b	5.58299643455629e-24	-0.682335	0.214	0.453	1.35851052242058e-19
Ube2b	5.63363143083943e-24	-0.344794	0.62	0.882	1.37083153606616e-19
Rps8	6.15013670031579e-24	0.592686	0.83	0.966	1.49651276328784e-19
Fam171a1	6.28065315097863e-24	-0.157722	0.53	0.792	1.52827133122763e-19
Anxa7	6.88765104723157e-24	-0.338704	0.48	0.742	1.67597212932286e-19
Fuca1	7.29189496047042e-24	-0.317663	0.578	0.839	1.77433680073127e-19
Sppl2a	7.31544546257757e-24	-0.218724	0.613	0.886	1.780067344409e-19
Tbc1d1	7.34362172524262e-24	-0.302216	0.709	0.934	1.78692347440329e-19
Rpl41	7.35443789969383e-24	0.601054	0.8	0.941	1.7895553741325e-19
Garem1	7.38522923443385e-24	-0.346684	0.536	0.776	1.79704782961479e-19
Zbtb20	7.74625964939703e-24	-0.346535	0.744	0.972	1.88489736048778e-19
Trib1	8.06295399312405e-24	-0.640236	0.297	0.539	1.96195859514688e-19
Dck	8.30568973941563e-24	2.24044	0.152	0.042	2.021023484292e-19
Sox4	8.85596506818863e-24	-0.105512	0.622	0.866	2.15492198004234e-19
Nmnat3	9.03177173393282e-24	-0.414391	0.208	0.449	2.19770101601787e-19
Trim30d	9.3224958351445e-24	-0.82635	0.125	0.352	2.26844291156571e-19
Clasp1	1.05544722799135e-23	-0.154814	0.601	0.863	2.56821973987135e-19
Cndp1	1.08268736936183e-23	-0.408532	0.412	0.679	2.63450317586815e-19
Elk3	1.11201129295832e-23	-0.278037	0.638	0.894	2.70585707915548e-19
Shroom4	1.11788181883448e-23	-0.459818	0.509	0.758	2.72014182976995e-19
Slc2a1	1.13128723998286e-23	-0.36752	0.341	0.589	2.75276124105029e-19
Nr1d2	1.14611430097723e-23	-0.34696	0.252	0.494	2.78883992856788e-19
Rigi	1.14853588550677e-23	-0.215161	0.41	0.669	2.79473237020363e-19
Plce1	1.21030862148646e-23	-0.300288	0.705	0.915	2.94504396866301e-19
Slfn5	1.22898117874577e-23	-0.582051	0.208	0.467	2.99047990224208e-19
Pmepa1	1.28693312062753e-23	-0.324244	0.599	0.882	3.13149436242296e-19
Tcf20	1.30133009342215e-23	-0.354565	0.696	0.957	3.16652651632412e-19
Wwp2	1.39584756769224e-23	-0.341785	0.437	0.696	3.39651588646553e-19
Arhgap11a	1.48874007388314e-23	2.16061	0.266	0.114	3.62255122177984e-19
Emid1	1.49417732954511e-23	2.14133	0.152	0.042	3.63578169598212e-19
Adgrf1	1.53369292113408e-23	-0.255677	0.096	0.332	3.73193498499555e-19
Gpd2	1.59170285475092e-23	-0.246343	0.474	0.741	3.8730905564654e-19
Kcnc2	1.62520709155221e-23	-0.370696	0.593	0.842	3.95461641587398e-19
Sdf4	1.6367543346302e-23	-0.349404	0.495	0.754	3.98271432245566e-19
Ext1	1.69698379047656e-23	-0.54826	0.501	0.74	4.12927065736661e-19
Edn1	1.73149008953359e-23	-0.41907	0.214	0.481	4.21323483486209e-19
Tmco4	1.82122936964278e-23	-0.227218	0.326	0.586	4.43159742515179e-19
Sprr2b	1.83233585425002e-23	-0.955528	0.104	0.341	4.45862283414658e-19
H2bc15	1.83537588951406e-23	3.10133	0.081	0.013	4.46602015195456e-19
Cacul1	1.86349340807682e-23	-0.323461	0.43	0.715	4.53443850987333e-19
Arid1b	2.12183065112445e-23	-0.237698	0.684	0.953	5.16305052338113e-19
Atad2	2.15654364166618e-23	2.48002	0.407	0.256	5.24751764326631e-19
Pax8	2.16333141858342e-23	-0.440119	0.661	0.91	5.26403434083903e-19
Wnt7b	2.34670425389806e-23	-0.6239	0.268	0.502	5.71023546101014e-19
Sec24b	2.45526956671649e-23	-0.305194	0.638	0.898	5.97440743669123e-19
Smg6	2.56011837706396e-23	-0.190021	0.588	0.878	6.22953604690974e-19
Nt5dc2	2.61891176679866e-23	3.87393	0.064	0.008	6.37259800215118e-19
Mme	2.77048212426119e-23	1.01919	0.277	0.112	6.74141415296476e-19
Gdpd1	2.86323990695805e-23	-0.466925	0.258	0.498	6.96712166560103e-19
Cebpd	2.86589831440434e-23	-0.215465	0.353	0.607	6.97359036844008e-19
Tpp1	2.89486364934696e-23	-0.107254	0.277	0.519	7.04407171795595e-19
Las1l	3.05665343986332e-23	-0.418925	0.611	0.851	7.43775481521942e-19
Recql4	3.1442682542572e-23	4.27538	0.037	0.002	7.65094794308404e-19
Rflnb	3.49972507704035e-23	-0.452518	0.376	0.621	8.51588102996229e-19
Ralgapa2	3.58384986501832e-23	-0.134073	0.561	0.833	8.72058187654907e-19
Sft2d2	3.69848822404526e-23	-0.26009	0.389	0.648	8.99953139556933e-19
Dnase1l1	3.77076619789424e-23	-0.905591	0.175	0.397	9.17540538933606e-19
Rps20	3.79247999907868e-23	0.520945	0.813	0.951	9.22824158175816e-19
Rpl13	3.96510257180716e-23	0.489841	0.844	0.966	9.64828408797836e-19
Atp10b	4.00811997372926e-23	-0.292741	0.719	0.946	9.75295833207542e-19
P4ha1	4.11712919439047e-23	-0.178663	0.314	0.582	1.00182104687103e-18
Zmiz1	4.19912789566192e-23	-0.320708	0.595	0.873	1.02177379085141e-18
Peg10	4.21131507806961e-23	-0.624187	0.229	0.486	1.02473929794668e-18
Cux1	4.32791035386321e-23	-0.309202	0.8	0.984	1.05311042640554e-18
Ift22	4.36962630283379e-23	-0.83453	0.108	0.328	1.06326116826855e-18
Serinc2	4.37250689502267e-23	-0.324416	0.416	0.684	1.06396210276587e-18
Slc39a6	4.44328678654089e-23	-0.740314	0.291	0.521	1.081184973769e-18
Mon2	4.54857320328841e-23	-0.268776	0.416	0.666	1.10680431755617e-18
Gramd4	4.59343164801573e-23	-0.339347	0.291	0.549	1.11771972291167e-18
Hoxb4	5.04471868292928e-23	-0.275647	0.364	0.618	1.22753139711718e-18
Neo1	5.22947772240968e-23	-0.157366	0.439	0.694	1.27248881419395e-18
Gls	5.24681021457622e-23	-0.401328	0.682	0.92	1.27670632951283e-18
Paqr5	5.51199182712089e-23	-0.449978	0.351	0.588	1.34123297129333e-18
Etv3	5.57090222211246e-23	-0.560706	0.353	0.589	1.35556763770662e-18
Gbp3	5.60147899908197e-23	-1.07282	0.135	0.357	1.36300788484662e-18
Lnx1	5.80923612766999e-23	-0.339551	0.401	0.64	1.41356142694594e-18
C77080	6.02873407312238e-23	-0.179563	0.318	0.551	1.46697186201287e-18
Cntnap3	6.37005988730049e-23	-0.778707	0.229	0.476	1.55002667237683e-18
Bbx	6.70536520521606e-23	-0.462498	0.499	0.761	1.63161651538522e-18
Gtdc1	7.12247927462296e-23	-0.779688	0.353	0.58	1.73311288189401e-18
Frs2	7.14685552089319e-23	-0.245705	0.505	0.748	1.73904435389894e-18
Stat6	7.42360703836702e-23	-0.184122	0.328	0.58	1.80638630064585e-18
Kif13a	7.78068207114087e-23	-0.263501	0.534	0.811	1.89327336837071e-18
Cemip2	7.84292752366848e-23	-0.287391	0.374	0.618	1.90841955433425e-18
Brip1	8.1634464116023e-23	2.5756	0.235	0.096	1.98641141533519e-18
Sppl3	8.36229547227126e-23	-0.240208	0.626	0.887	2.03479735726776e-18
Gsk3b	8.3838538160079e-23	-0.344716	0.763	0.979	2.0400431490492e-18
Gcat	8.55399184534114e-23	1.69146	0.181	0.058	2.08144283572686e-18
Trappc9	8.78156498826591e-23	-0.136715	0.445	0.707	2.13681820859474e-18
Ezh1	8.87796963727326e-23	0.108612	0.432	0.693	2.1602763518377e-18
Gm1965	8.92708287672143e-23	-1.44717	0.067	0.272	2.17222707639263e-18
Glipr2	9.03294040258776e-23	-0.813853	0.1	0.318	2.19798538816168e-18
Atp7a	9.1200223196412e-23	-0.337988	0.299	0.563	2.21917503103829e-18
Lncpint	9.66072485410224e-23	-0.284974	0.509	0.779	2.3507441787487e-18
Slc22a4	9.70918568079542e-23	-0.282042	0.231	0.477	2.36253615170795e-18
Zfhx2	1.03543517250337e-22	-0.255217	0.202	0.444	2.51952440525246e-18
Cdc42ep3	1.04332038372451e-22	-1.13178	0.131	0.355	2.53871148971684e-18
Ctnnd1	1.08696664028887e-22	-0.257781	0.748	0.975	2.64491592581491e-18
Tanc2	1.16108529921902e-22	-0.824061	0.227	0.46	2.82526885858964e-18
Cadm1	1.24465331557113e-22	-0.28656	0.59	0.834	3.02861491277923e-18
Mindy3	1.28275468798721e-22	-0.548255	0.376	0.619	3.12132698227929e-18
Arhgap8	1.42298872806734e-22	-0.754869	0.177	0.403	3.46255847200626e-18
Atf7ip2	1.46701024854677e-22	3.03306	0.054	0.005	3.56967603778886e-18
Skic2	1.47841980874253e-22	-0.537299	0.241	0.465	3.59743892061321e-18
Clk1	1.52988713797338e-22	0.201515	0.609	0.88	3.72267437283062e-18
Map1lc3a	1.53556934332886e-22	-0.407319	0.349	0.577	3.73650088312213e-18
Tra2a	1.55102364650682e-22	-0.312206	0.682	0.947	3.77410583904504e-18
Smap2	1.61163468917565e-22	-0.404813	0.435	0.677	3.92159068917111e-18
Ubxn7	1.64927006032523e-22	-0.438263	0.368	0.62	4.01316883778938e-18
Kansl1l	1.7187124974804e-22	-0.138336	0.416	0.688	4.18214312011907e-18
Atg4c	1.7457351652666e-22	-0.237894	0.289	0.524	4.24789737764322e-18
Rnf13	1.8258585457157e-22	-0.330624	0.349	0.584	4.44286159929001e-18
Gmnn	1.83315526294433e-22	2.11399	0.316	0.158	4.46061670132243e-18
Ppm1l	1.84983147779584e-22	-0.586376	0.405	0.646	4.50119493492062e-18
Lrrc36	1.87720706509706e-22	-0.94721	0.152	0.378	4.56780795150068e-18
Pik3cb	1.96042234974711e-22	-0.202429	0.541	0.809	4.77029570363965e-18
Cdc6	2.01977851172127e-22	2.38552	0.22	0.088	4.91472705257136e-18
Rnf216	2.02452185743909e-22	-0.220996	0.582	0.866	4.92626903570654e-18
Meis1	2.02463946659089e-22	-0.482745	0.832	0.969	4.92655521405561e-18
Maml3	2.02496167137098e-22	-0.887799	0.247	0.481	4.927339234947e-18
Rnf19b	2.02743035934097e-22	-0.15069	0.358	0.606	4.93334629338438e-18
Phlda1	2.03987813828509e-22	-1.02402	0.364	0.615	4.96363547388911e-18
Atp2b1	2.41418727957337e-22	-0.420036	0.827	0.988	5.87444190738587e-18
Lmo7	2.43910103807198e-22	-0.735333	0.366	0.602	5.93506455594056e-18
A630001G21Rik	2.47885210347881e-22	-0.217989	0.326	0.559	6.03179082339498e-18
Capn2	2.60954030424507e-22	-0.158761	0.432	0.682	6.34979442231954e-18
Btbd7	2.62067455775598e-22	-0.154524	0.632	0.898	6.37688740138763e-18
Pcdh17	2.64004794230443e-22	-0.472805	0.256	0.535	6.42402865800937e-18
Ptgr1	2.64953713355354e-22	1.47996	0.26	0.107	6.44711870707582e-18
Zfp423	2.70058422508642e-22	-1.43533	0.06	0.263	6.57133159490279e-18
Btbd8	2.82673979644773e-22	-0.354233	0.233	0.464	6.87830594669625e-18
Slco5a1	2.99381045196388e-22	-0.39161	0.501	0.745	7.2848389727637e-18
Yap1	2.99709275453839e-22	-0.20959	0.561	0.817	7.29282579961826e-18
Picalm	3.00259251455779e-22	-0.227518	0.64	0.901	7.30620836567348e-18
Tent5a	3.05925328855676e-22	-0.166423	0.443	0.736	7.44408102704515e-18
AA467197	3.2037566643518e-22	-1.01301	0.06	0.265	7.79570109136723e-18
Skp2	3.26647545088824e-22	1.76646	0.193	0.068	7.94831471464636e-18
Synj1	3.44578691999508e-22	-0.349251	0.432	0.676	8.38463331242403e-18
Macroh2a2	3.49836387507091e-22	2.80641	0.098	0.02	8.51256881721006e-18
Pfkl	3.6597393850189e-22	-0.308211	0.299	0.531	8.90524384556648e-18
Tube1	3.6694367848637e-22	2.66284	0.077	0.012	8.92884052860885e-18
Pdlim5	3.87648986329982e-22	-0.540394	0.713	0.942	9.43266278436745e-18
Vps35l	3.88989311585384e-22	-0.300197	0.279	0.511	9.46527691880715e-18
Cttn	3.97789719813151e-22	-0.191159	0.536	0.801	9.67941725221341e-18
Flii	4.08141829602416e-22	-0.25188	0.503	0.765	9.9313151397156e-18
Hsp90ab1	4.32144217182623e-22	0.542615	0.854	0.97	1.05153652367048e-17
Pvr	4.34912130181554e-22	-0.16554	0.137	0.371	1.05827168637078e-17
Phf11d	4.41488932373629e-22	-0.323216	0.349	0.604	1.07427501914475e-17
Ptk2	4.72676964677356e-22	-0.219379	0.661	0.936	1.15016485814941e-17
Cldn23	4.74451668959567e-22	-0.47094	0.262	0.489	1.15448324607931e-17
Ddias	5.02190649650109e-22	2.58534	0.1	0.021	1.22198050779361e-17
Casp7	5.13532281221834e-22	-0.484538	0.374	0.597	1.24957809989709e-17
Fcho2	5.24513742878411e-22	-0.216422	0.647	0.915	1.27629929054604e-17
Arap2	5.26886522526433e-22	-0.283419	0.642	0.906	1.28207297526357e-17
Ahr	5.2892117194475e-22	-0.352928	0.326	0.567	1.28702388769316e-17
Trim30a	5.37654660119058e-22	-0.285111	0.351	0.605	1.3082750844677e-17
Stat3	5.42918417966608e-22	-0.245912	0.672	0.92	1.32108338643815e-17
Slc40a1	5.66004875414912e-22	-0.353738	0.825	0.951	1.37725966334711e-17
Oas1a	5.80503065603793e-22	-0.903522	0.218	0.447	1.41253810953371e-17
Mafg	6.35532398883401e-22	-0.314673	0.416	0.667	1.54644098620298e-17
Cpne8	6.70285517661315e-22	-0.291216	0.287	0.526	1.63100575012528e-17
Mgat4b	6.9274119345187e-22	-0.354922	0.401	0.654	1.68564714602644e-17
Barx2	7.19986640771665e-22	-0.408297	0.557	0.794	1.75194349298969e-17
Ptn	7.26905524244074e-22	1.67534	0.378	0.209	1.7687792121431e-17
Pde4b	7.38976145585043e-22	-0.448061	0.098	0.321	1.79815065505208e-17
Sh3pxd2b	7.45618226623563e-22	-0.198658	0.507	0.772	1.81431283084312e-17
Ubash3b	7.47719937298916e-22	-0.333362	0.459	0.711	1.81942692342945e-17
Kif13b	7.65688692433288e-22	-0.177376	0.634	0.889	1.86315029529792e-17
Nampt	7.85950283317068e-22	-0.237166	0.395	0.638	1.91245282439542e-17
Arhgap26	8.347191963323e-22	-0.564385	0.214	0.447	2.03112222043538e-17
Stk19	8.60539690317919e-22	-0.421352	0.291	0.516	2.09395122845059e-17
Srcap	8.67577744716335e-22	-0.179423	0.57	0.843	2.11107692621826e-17
Gna14	8.92574690616013e-22	-0.685841	0.06	0.262	2.17190199467594e-17
Mir99ahg	9.53058874111311e-22	-0.29093	0.613	0.88	2.31907815837505e-17
Pold2	9.71257149088497e-22	1.7413	0.239	0.097	2.36336002087704e-17
Serinc3	9.83666468688787e-22	-0.214558	0.395	0.667	2.39355561826043e-17
Uhrf1bp1l	1.03097265239672e-21	-0.450705	0.389	0.637	2.50866575507695e-17
AU040320	1.05652557392356e-21	-0.108397	0.424	0.683	2.5708436790282e-17
Rnf145	1.07069576171552e-21	-0.31816	0.387	0.62	2.60532399698237e-17
AI661453	1.09119898720281e-21	-0.1283	0.385	0.642	2.65521449556059e-17
Csf1	1.09882950377938e-21	-0.394905	0.098	0.32	2.67378183154636e-17
Ino80d	1.10544183289669e-21	-0.178328	0.53	0.806	2.68987161198751e-17
Fbxo5	1.1137129421958e-21	2.78723	0.154	0.048	2.70999770224504e-17
Fbxo48	1.13610122757161e-21	4.03495	0.029	0.001	2.76447511704999e-17
Map4k3	1.20794662994745e-21	-0.173141	0.678	0.929	2.93929653465112e-17
Acap2	1.26478393047294e-21	-0.252206	0.547	0.798	3.07759873801982e-17
Irf2bp2	1.36458254387994e-21	-0.277307	0.555	0.797	3.32043870402305e-17
Spint1	1.36547932405467e-21	-0.2434	0.455	0.693	3.32262083922224e-17
Ahcyl2	1.38622220765065e-21	-0.345171	0.877	0.982	3.37309449787634e-17
Adm	1.53742066282073e-21	-1.08719	0.106	0.324	3.74100569884169e-17
Tnfaip2	1.65290701945135e-21	-0.820924	0.162	0.395	4.02201865043098e-17
Spata6	1.6820581859783e-21	-0.489044	0.297	0.521	4.092952183941e-17
Smim14	1.69247717195061e-21	-0.281392	0.326	0.568	4.11830470250742e-17
Cradd	1.71579628308149e-21	-0.532784	0.37	0.61	4.17504709562218e-17
Eif4a2	1.72749253648458e-21	-0.504982	0.669	0.92	4.20350758902793e-17
Igf2r	1.83997306474804e-21	-0.413524	0.435	0.672	4.4772064584514e-17
Kcnq1	1.85544899206163e-21	-0.261221	0.455	0.713	4.51486403238356e-17
Slc25a13	1.90673666715574e-21	-0.266823	0.701	0.923	4.63966233219006e-17
Tsc22d2	1.95042218450997e-21	-0.477903	0.472	0.737	4.74596230156811e-17
Rere	2.02963081762937e-21	-0.266031	0.821	0.985	4.93870066853754e-17
Lzts2	2.13841490770267e-21	0.216068	0.331	0.576	5.2034049949129e-17
Slc39a4	2.14696951757539e-21	-0.292097	0.441	0.677	5.2242209271162e-17
Manba	2.16075355886047e-21	-0.217082	0.331	0.559	5.25776163477517e-17
Tmem184b	2.21786842931944e-21	-0.638272	0.225	0.454	5.396739249063e-17
Ncl	2.25486811981407e-21	0.817853	0.751	0.926	5.48677059594357e-17
Atxn7l1	2.3920746642981e-21	-0.257087	0.559	0.832	5.82063528063657e-17
ENSMUSG00000121513	2.45711716713482e-21	-0.4079	0.767	0.981	5.97890320278915e-17
Vps50	2.5241930234654e-21	-0.40596	0.341	0.577	6.14211888399836e-17
H2bc12	2.64938886884771e-21	5.26798	0.044	0.003	6.44675793456713e-17
Bmpr1a	2.66913031421884e-21	-0.217997	0.634	0.889	6.49479479358871e-17
Itsn2	2.8260178247512e-21	-0.232101	0.653	0.915	6.87654917296709e-17
Usp22	2.83129191508877e-21	-0.210747	0.37	0.614	6.88938261698549e-17
Meis2	2.84011828957903e-21	-0.29412	0.326	0.605	6.91085983403266e-17
Dennd1b	2.98892504239208e-21	-0.235133	0.613	0.889	7.27295130565265e-17
Sidt2	3.05715470428403e-21	-0.495668	0.229	0.448	7.43897454193434e-17
F11r	3.06284422059789e-21	-0.14377	0.568	0.847	7.45281884198084e-17
H2ac7	3.20954079132191e-21	3.99901	0.044	0.003	7.80977560752361e-17
Alkbh5	3.21543910514104e-21	-0.349578	0.464	0.724	7.82412797453969e-17
Gpr107	3.31747610355623e-21	-0.239478	0.347	0.584	8.07241460278339e-17
Ankrd33b	3.36331058757394e-21	-0.830619	0.279	0.5	8.18394365274366e-17
Scamp1	3.36824620773996e-21	-0.65186	0.341	0.57	8.19595349729365e-17
Vwa2	3.41387529576348e-21	-0.284773	0.283	0.525	8.30698275718129e-17
Washc4	3.44687899000499e-21	-0.468348	0.451	0.697	8.38729064637914e-17
Klf5	3.64469447620514e-21	-0.30127	0.62	0.868	8.86863506894997e-17
Ctss	3.66825129998051e-21	-0.308508	0.189	0.428	8.92595588824258e-17
Zmynd8	3.75379628397054e-21	-0.23167	0.775	0.959	9.13411249778552e-17
Tnfaip8	3.77345143635918e-21	-0.207093	0.507	0.753	9.18193938009279e-17
Clstn1	3.85484172860823e-21	-0.213626	0.497	0.743	9.3799863782224e-17
Usp3	4.11937178391335e-21	-0.100808	0.688	0.924	1.00236673617964e-16
Bex3	4.88861571419616e-21	1.54813	0.32	0.162	1.18954686173535e-16
Ifit1bl1	5.22491378215506e-21	-0.544114	0.091	0.31	1.27137827061179e-16
Rab11a	5.56310960048402e-21	-0.206043	0.563	0.828	1.35367145908578e-16
Sass6	5.59739253635979e-21	1.76562	0.308	0.149	1.36201352587243e-16
P2rx4	5.80477584135536e-21	-0.722008	0.137	0.344	1.412476105477e-16
Apc	5.82811345776388e-21	-0.121557	0.696	0.945	1.41815484767768e-16
Sp100	5.86462336892301e-21	-0.195157	0.511	0.778	1.42703880436004e-16
R3hdm4	5.92517502312169e-21	-0.208782	0.576	0.816	1.4417728383762e-16
Efhb	6.01536797173239e-21	-0.182496	0.364	0.623	1.46371948856164e-16
Smurf2	6.40688255081292e-21	-0.301101	0.611	0.883	1.55898673108931e-16
H2ax	6.52385278983509e-21	2.18865	0.401	0.253	1.58744909935057e-16
Gm30806	6.53590124723294e-21	-0.652629	0.121	0.33	1.59038085048919e-16
Atxn7	7.06113462544556e-21	-0.134784	0.489	0.749	1.71818588840967e-16
Naip5	7.10488691467925e-21	-0.250843	0.484	0.729	1.7288321329489e-16
Als2cl	7.21158232142203e-21	-0.247799	0.368	0.602	1.75479432627162e-16
Anxa3	7.38135707079544e-21	-0.539028	0.378	0.623	1.79610561603665e-16
Wdr72	7.5488823681421e-21	-0.327431	0.154	0.38	1.83686954664002e-16
Ybx1	7.92418564288184e-21	0.667417	0.8	0.963	1.92819209248244e-16
Gvin1	8.08724548600465e-21	-0.85734	0.135	0.349	1.96786944410951e-16
Nup85	8.16830538744262e-21	1.53194	0.264	0.116	1.98759374992641e-16
Numb	8.63150861605148e-21	-0.21002	0.659	0.925	2.10030499154381e-16
Csnk1g1	8.7195875243714e-21	-0.217034	0.58	0.841	2.12173723230529e-16
Ythdf3	9.03742869535609e-21	-0.150707	0.628	0.91	2.199077524441e-16
Rasef	9.15385174543276e-21	-0.270432	0.48	0.735	2.22740674521615e-16
D5Ertd579e	9.32826125354501e-21	-0.23856	0.472	0.717	2.26984581082511e-16
Cd164	9.59958104654588e-21	-0.184116	0.62	0.858	2.33586605605601e-16
Rab32	9.8324642853121e-21	-0.656636	0.368	0.581	2.39253353454499e-16
H2ac20	1.03474031140199e-20	3.13275	0.158	0.051	2.51783359973447e-16
Mlxip	1.03849290597341e-20	-0.175074	0.541	0.79	2.5269647881051e-16
Arhgef7	1.07569374280029e-20	-0.711329	0.283	0.508	2.61748558435594e-16
Mdfi	1.07621847871591e-20	-1.56879	0.104	0.302	2.61876242425942e-16
Ska2	1.11334978596417e-20	1.61244	0.208	0.078	2.70911403418662e-16
Reps2	1.16888628741408e-20	-0.236699	0.306	0.546	2.84425100316468e-16
Gns	1.19981290492893e-20	-0.154851	0.464	0.707	2.91950474156356e-16
Zdhhc13	1.26549689503953e-20	-0.307499	0.418	0.671	3.07933359469968e-16
Slc23a1	1.31311895771197e-20	0.120107	0.364	0.633	3.19521235980055e-16
Tbc1d23	1.32116479626224e-20	-0.362714	0.335	0.561	3.21479029874491e-16
Sgms1	1.32591509812339e-20	-0.292613	0.672	0.925	3.22634920826365e-16
Cited1	1.36435623073957e-20	-2.51094	0.025	0.197	3.31988801625859e-16
Znfx1	1.40301757592979e-20	-0.450709	0.356	0.572	3.41396266750996e-16
Rps24	1.40360924304231e-20	0.437858	0.852	0.966	3.41540237109485e-16
Gse1	1.41501820881435e-20	-0.297015	0.468	0.709	3.44316380750797e-16
Cdc42ep4	1.43961527015217e-20	-0.63801	0.22	0.435	3.50301583686128e-16
Mis18a	1.64882360658227e-20	2.09867	0.206	0.08	4.01208248189665e-16
Raf1	1.67650360961096e-20	-0.207734	0.555	0.813	4.07943623326634e-16
Scfd1	1.69292792271262e-20	-0.358519	0.459	0.712	4.11940151433661e-16
C130074G19Rik	1.71244364826868e-20	-1.11558	0.056	0.245	4.16688912933218e-16
Exoc1	1.71535907959049e-20	-0.245948	0.353	0.585	4.17398324836753e-16
Celf2	1.733203691816e-20	-0.280331	0.888	0.985	4.21740454329587e-16
Scyl2	1.76696600884633e-20	-0.307467	0.43	0.676	4.29955838932578e-16
Lsr	1.91918598874688e-20	-0.13816	0.555	0.805	4.66995526641778e-16
Hnrnpa3	1.92964650390032e-20	0.701083	0.769	0.949	4.69540883794065e-16
Zbtb18	1.95251799055694e-20	-0.276712	0.31	0.534	4.75106202642219e-16
Smg7	1.96556276500994e-20	-0.253718	0.644	0.911	4.78280387609868e-16
Ly96	2.00333311350419e-20	-0.438782	0.229	0.437	4.87471046508974e-16
9930111J21Rik2	2.07588665680225e-20	-0.866173	0.202	0.422	5.05125500199692e-16
H3c1	2.09543794487603e-20	3.48046	0.077	0.014	5.09882915126685e-16
ENSMUSG00000095041	2.14440956865047e-20	0.109334	0.549	0.816	5.21799180339718e-16
Gna13	2.20069717308543e-20	-0.103943	0.507	0.766	5.35495643126877e-16
Gk5	2.20954719207181e-20	-0.175597	0.345	0.582	5.37649118246834e-16
Sh2d4b	2.23384761544582e-20	-0.418262	0.378	0.64	5.43562140266431e-16
Dock1	2.39861317784446e-20	-0.30771	0.798	0.985	5.83654544564892e-16
Sorbs2	2.516309521441e-20	-0.44056	0.499	0.712	6.12293595852239e-16
Chd6	2.57409804576792e-20	-0.117712	0.634	0.896	6.26355277476709e-16
Chst11	2.58389608779089e-20	-0.671834	0.391	0.626	6.28739435042156e-16
Mbtd1	2.65081166440203e-20	-0.136808	0.551	0.811	6.45022002298946e-16
Dmtf1	2.68952341059394e-20	-0.112365	0.453	0.692	6.54441731499823e-16
Leng8	2.86646225664877e-20	-0.456073	0.318	0.541	6.97496260910346e-16
Tnfrsf11a	2.91039115317308e-20	-0.792898	0.247	0.469	7.08185479301604e-16
Ist1	2.919168794775e-20	-0.144001	0.439	0.685	7.103213428326e-16
Slf2	2.96993187319913e-20	-0.26041	0.578	0.84	7.22673522705543e-16
Cop1	2.98645548810048e-20	-0.195656	0.651	0.904	7.2669421391949e-16
Nhsl1	3.23019800369279e-20	-0.196419	0.672	0.909	7.86004080238566e-16
Naip6	3.31037286008265e-20	-0.201061	0.615	0.846	8.05513028043911e-16
Ccng2	3.47692272610063e-20	-0.918453	0.133	0.342	8.46039606942067e-16
Arrdc4	3.55019849163804e-20	-0.439705	0.331	0.557	8.63869798970285e-16
Sestd1	3.86147223385375e-20	-0.217917	0.751	0.957	9.39612038663634e-16
Lrrfip1	3.88846598738161e-20	-0.291659	0.684	0.93	9.46180428709567e-16
Klf3	4.07480309783855e-20	-0.254043	0.661	0.897	9.91521837797055e-16
Galc	4.14041592309783e-20	0.403635	0.256	0.502	1.00748740656739e-15
Grip1	4.17908909117088e-20	-0.372828	0.888	0.998	1.01689774855461e-15
Cx3cl1	4.33041964285377e-20	-0.385667	0.235	0.446	1.05372101169561e-15
Epha1	4.46911003599917e-20	-0.769062	0.193	0.41	1.08746854505968e-15
Lgals8	4.52591163212554e-20	-0.236183	0.41	0.636	1.10129007744511e-15
Scamp2	4.85806169665467e-20	-0.167809	0.482	0.729	1.18211215264698e-15
Phgdh	5.14258295868326e-20	2.4218	0.073	0.012	1.2513447113364e-15
Samd9l	5.27831764154883e-20	-0.183542	0.728	0.927	1.28437303171808e-15
Sdf2	5.47619484666303e-20	-0.209994	0.468	0.696	1.33252249203852e-15
Errfi1	5.50757739488638e-20	-0.683116	0.559	0.784	1.3401588074977e-15
Dctpp1	5.55872371196629e-20	1.65506	0.393	0.24	1.35260424083276e-15
Stx5a	6.40903935215457e-20	-0.207392	0.356	0.597	1.55951154555977e-15
H2ac12	6.53627283595531e-20	4.50567	0.027	0.001	1.59047126917301e-15
Rbm33	6.59048439947678e-20	-0.137118	0.536	0.807	1.60366256892469e-15
Herc6	6.65143988079657e-20	-0.743311	0.374	0.594	1.61849486619423e-15
Naaladl2	6.83639412637534e-20	-0.339912	0.765	0.957	1.66349978277091e-15
Noxa1	6.95063023183682e-20	-0.136815	0.152	0.366	1.69129685431285e-15
Banp	7.04088012373015e-20	-0.304919	0.522	0.78	1.71325736050726e-15
Tmtc2	7.15686550881533e-20	-0.224312	0.807	0.974	1.74148008426003e-15
Psat1	7.67414395409394e-20	1.35207	0.295	0.141	1.86734944834968e-15
Secisbp2l	7.92098137258607e-20	-0.163036	0.518	0.786	1.92741239739137e-15
Tlr5	8.16975778996619e-20	-0.45566	0.046	0.228	1.98794716303247e-15
Rps10	8.62411841408812e-20	0.583816	0.798	0.917	2.09850673370006e-15
Lypd8l	8.95782952600601e-20	-1.30681	0.089	0.283	2.17970865856304e-15
Fam83d	9.12225107250878e-20	3.63015	0.046	0.004	2.21971735347356e-15
Il18r1	9.1375120945464e-20	-0.451173	0.148	0.354	2.22343081796598e-15
Ube2g1	9.52655421452322e-20	-0.109872	0.622	0.872	2.31809643701993e-15
Trim6	1.00731716847101e-19	-0.606625	0.141	0.345	2.4511048660405e-15
Slc16a3	1.00826298854372e-19	0.2556	0.075	0.278	2.45340633002344e-15
Itm2b	1.02736907456022e-19	-0.372806	0.711	0.935	2.49989716912738e-15
Eps15	1.03279831477504e-19	-0.184829	0.505	0.743	2.51310813934211e-15
Ubxn4	1.0596984703691e-19	-0.239876	0.578	0.852	2.57856428794912e-15
Ap3d1	1.06730639559865e-19	-0.299638	0.474	0.725	2.59707665241019e-15
Wls	1.07673910063255e-19	-0.282564	0.751	0.965	2.62002925356919e-15
Arl5b	1.08005886522229e-19	-0.114358	0.366	0.586	2.62810723674539e-15
Dusp1	1.08940061876632e-19	-1.18677	0.143	0.352	2.65083852564408e-15
Ncoa2	1.09574556655939e-19	-0.244812	0.69	0.946	2.66627768710897e-15
Pard6b	1.1530180198695e-19	-0.792945	0.291	0.493	2.80563874774845e-15
Idi1	1.15340654593604e-19	1.51391	0.376	0.21	2.80658414822618e-15
Esco1	1.16569699521563e-19	-0.133299	0.532	0.814	2.8364904984582e-15
Slk	1.17792893436809e-19	-0.239775	0.736	0.967	2.86625447599788e-15
Gnaq	1.2162178731758e-19	-0.133065	0.757	0.967	2.95942295079867e-15
Psap	1.23094512268173e-19	-0.212586	0.63	0.877	2.99525876702144e-15
Plxna2	1.23284500635628e-19	-0.699509	0.216	0.43	2.99988175396673e-15
Rab12	1.28210228358395e-19	-0.383963	0.383	0.6	3.11973948664483e-15
F2rl1	1.2845066812668e-19	-0.358894	0.376	0.605	3.1255901075265e-15
Traf6	1.29868622209978e-19	-0.742456	0.195	0.409	3.16009318423538e-15
Ccdc18	1.32502320093483e-19	2.24363	0.173	0.06	3.22417895483473e-15
Osbpl10	1.34233397153203e-19	-0.245768	0.532	0.8	3.26630125292888e-15
Smg1	1.41798556627718e-19	-0.112382	0.701	0.952	3.45038427842227e-15
Nfat5	1.55339589169793e-19	-0.247298	0.761	0.972	3.77987822326858e-15
Ranbp10	1.59631492825191e-19	-0.140512	0.36	0.581	3.88431311491537e-15
Tle1	1.65733184865537e-19	-0.239703	0.368	0.601	4.0327855873331e-15
Vav2	1.75458686535883e-19	-0.194493	0.358	0.581	4.26943621947763e-15
Galnt3	1.78080355998819e-19	-0.198546	0.611	0.868	4.33322930251926e-15
Rpl6	1.79606775671705e-19	0.468248	0.792	0.954	4.3703716724196e-15
Eif2ak3	1.82178654462188e-19	-0.223139	0.299	0.53	4.43295319902842e-15
Akap10	1.92383677669616e-19	-0.148664	0.489	0.746	4.68127202873477e-15
Ubac2	1.97623967432844e-19	-0.278854	0.378	0.613	4.80878399954338e-15
C2	1.98144501784959e-19	-0.200158	0.15	0.357	4.8214501619334e-15
Fut9	2.1079059706951e-19	-0.294179	0.913	0.989	5.12916759849238e-15
Ksr1	2.11950409675351e-19	-0.705137	0.208	0.415	5.1573893186303e-15
Map3k9	2.2506164968017e-19	-0.330494	0.262	0.48	5.47642512166758e-15
Tspan14	2.25502274557621e-19	-0.420893	0.682	0.924	5.48714684681059e-15
Chic1	2.34879660314928e-19	-0.412067	0.349	0.57	5.71532677444315e-15
Rpsa	2.45695923662519e-19	0.595698	0.771	0.944	5.97851891048006e-15
Atp6v1a	2.46881227859712e-19	-0.241154	0.684	0.919	6.00736091751038e-15
Afap1	2.61455274189001e-19	-0.256878	0.466	0.723	6.36199118684097e-15
Pof1b	2.69481896417532e-19	-0.258497	0.212	0.427	6.55730298552779e-15
Ppp4r3b	2.78571921335953e-19	-0.1901	0.611	0.894	6.77849056186773e-15
Slc39a2	2.83543167542246e-19	-0.345498	0.316	0.544	6.89945589580547e-15
Bcl6	2.84169809459029e-19	-0.536528	0.291	0.513	6.91470397356655e-15
Peli1	2.9333861138427e-19	-0.211979	0.553	0.795	7.13780843081344e-15
Atxn2	2.95281209819346e-19	-0.197673	0.595	0.863	7.18507767853414e-15
Lrrc20	3.15390022585311e-19	-0.69929	0.137	0.34	7.67438541956836e-15
Rabgap1	3.17406639980646e-19	-0.147347	0.624	0.886	7.72345577064905e-15
Rplp1	3.18447719982423e-19	0.578305	0.813	0.944	7.74878837033229e-15
Niban2	3.31163631519253e-19	-0.264175	0.389	0.599	8.05820464575797e-15
Cdk13	3.34685851659363e-19	-0.145907	0.701	0.944	8.14391082842728e-15
Haus5	3.46209092448802e-19	2.74377	0.085	0.018	8.42430584655669e-15
Haus1	3.73595765718195e-19	1.86283	0.202	0.079	9.09070576722084e-15
Hsd17b11	3.78402388593336e-19	-0.715211	0.493	0.742	9.20766532164165e-15
Hbs1l	3.90743475025333e-19	-0.170442	0.449	0.703	9.50796097779144e-15
Stk38l	4.00484397473418e-19	-0.54684	0.272	0.483	9.74498684372067e-15
Baiap2	4.04241908762157e-19	-0.563309	0.403	0.629	9.83641836590956e-15
Hs3st1	4.06170225588812e-19	-0.531681	0.293	0.5	9.88334009925256e-15
Chil1	4.13598476965071e-19	-0.617955	0.056	0.245	1.00640917399911e-14
Gsap	4.14926817311095e-19	-0.124134	0.312	0.544	1.00964142456309e-14
Rtn4	4.31549604392254e-19	-0.251918	0.796	0.978	1.05008965236767e-14
Arhgef11	4.57969579183522e-19	-0.125465	0.576	0.833	1.11437737702726e-14
Rnaset2a	4.74910093850184e-19	-0.471609	0.412	0.615	1.15559873136565e-14
Scarb2	4.84792990118345e-19	-0.420679	0.362	0.582	1.17964678285497e-14
Dnmt1	4.97565745719001e-19	2.0468	0.457	0.348	1.21072672905805e-14
Zdhhc5	5.02819715506591e-19	-0.113441	0.509	0.792	1.22351121374219e-14
Rprd1a	5.15540426286872e-19	-0.201188	0.41	0.656	1.25446451928385e-14
Zup1	5.3655050581926e-19	-0.266715	0.364	0.593	1.30558834581001e-14
Ppp2r5a	5.59909096651525e-19	-0.212046	0.576	0.825	1.36242680488216e-14
Oasl1	5.84384452882291e-19	-0.41699	0.274	0.514	1.42198268919848e-14
Arid5b	6.09092802647603e-19	-0.307705	0.821	0.982	1.48210551668241e-14
Ccsap	6.11990592726112e-19	4.67773	0.033	0.002	1.48915670928045e-14
Neu1	6.15432579241405e-19	-0.354738	0.393	0.617	1.49753209506811e-14
Spen	6.16151432026141e-19	-0.19548	0.58	0.86	1.49928127954921e-14
Xrcc2	6.57234228222188e-19	2.48616	0.069	0.012	1.59924804753305e-14
Ubc	6.80013103666665e-19	-0.539182	0.665	0.902	1.6546758851521e-14
Spidr	6.8272498882618e-19	-0.339424	0.445	0.675	1.66127471531074e-14
Midn	6.85009024785282e-19	-0.212875	0.518	0.775	1.66683246001003e-14
Fermt1	7.0713917631351e-19	-0.279704	0.667	0.892	1.72068175772366e-14
Rcsd1	7.22544853841713e-19	-0.747809	0.123	0.318	1.75816839285304e-14
Stk3	7.54878143976139e-19	-0.283251	0.626	0.888	1.83684498773714e-14
Phc2	7.59150772411938e-19	-0.171217	0.387	0.619	1.84724157450997e-14
Pkmyt1	7.7450301187558e-19	2.06446	0.112	0.03	1.88459817879685e-14
Ranbp1	7.90602371839029e-19	1.44805	0.588	0.643	1.92377275139591e-14
Sirpa	7.98512817743672e-19	-0.323735	0.216	0.426	1.94302123941568e-14
Tmem63b	8.33937951289157e-19	-0.174558	0.324	0.535	2.02922121687191e-14
Galnt7	8.52288231141404e-19	-0.243095	0.669	0.902	2.07387295283638e-14
Wsb1	9.14202916521648e-19	-0.198985	0.395	0.634	2.22452995677213e-14
Dock5	9.14868777454738e-19	-0.168041	0.455	0.692	2.22615019618061e-14
Gk	9.31927064983348e-19	-0.886342	0.137	0.335	2.26765812722398e-14
Rela	9.32255801935406e-19	-0.279612	0.343	0.552	2.26845804284942e-14
Eva1a	9.41286108932335e-19	-0.524831	0.43	0.647	2.29043148886505e-14
Wdr90	9.52674036436179e-19	2.31626	0.083	0.017	2.31814173286016e-14
Pik3c3	9.76689258786232e-19	-0.489879	0.358	0.573	2.37657797340454e-14
Ppp1r1b	9.77967440731358e-19	2.70716	0.083	0.017	2.37968817353161e-14
Rbm47	9.92771956835843e-19	-0.308544	0.667	0.931	2.41571200256866e-14
Cited2	9.9320563308999e-19	-0.363698	0.204	0.408	2.41676726699787e-14
Spns2	1.00508886506697e-18	-0.636848	0.289	0.488	2.44568273536746e-14
Chd9	1.09856457023544e-18	-0.222456	0.663	0.925	2.6731371687539e-14
Ttc17	1.12548898124281e-18	-0.164253	0.412	0.631	2.73865233805814e-14
Ppp1r15a	1.17309020431277e-18	-0.521173	0.235	0.453	2.85448039415427e-14
Zswim4	1.21867863791557e-18	-0.742861	0.116	0.307	2.96541072963996e-14
Wfdc18	1.252461926799e-18	-0.533155	0.067	0.257	3.04761560648e-14
Shtn1	1.33475097902256e-18	-0.181532	0.501	0.756	3.24784955725559e-14
Wdr44	1.34672193697447e-18	-0.115344	0.383	0.602	3.27697848923998e-14
Ano6	1.38049830227941e-18	-0.386877	0.53	0.787	3.35916651893649e-14
Ngef	1.44829216479284e-18	-0.716322	0.42	0.641	3.52412932459041e-14
Erc1	1.45019561683712e-18	-0.179248	0.518	0.785	3.52876099444976e-14
Dpp3	1.5402133533867e-18	-0.229677	0.389	0.611	3.74780115279587e-14
Dusp4	1.58431948388539e-18	-0.886085	0.125	0.312	3.85512460013833e-14
Hint3	1.66560988350857e-18	-0.474857	0.297	0.51	4.05292852954139e-14
Tjp2	1.72428989881351e-18	-0.427267	0.757	0.978	4.19571461078292e-14
Git2	1.77844036288063e-18	-0.214023	0.464	0.698	4.32747893499744e-14
Dcaf6	1.79380409199163e-18	-0.159976	0.491	0.727	4.36486349704324e-14
4632427E13Rik	1.83372839458492e-18	-0.230577	0.391	0.621	4.46201130254348e-14
Nfkb2	1.87012585292148e-18	-0.30644	0.11	0.303	4.55057723791384e-14
Rab7	1.87520724789878e-18	-0.241326	0.59	0.856	4.56294179631209e-14
Chd8	1.87982278557265e-18	-0.184913	0.505	0.751	4.57417278413393e-14
Dmd	1.88878097748086e-18	-0.534838	0.345	0.563	4.59597075250418e-14
Tspan1	1.94857958300895e-18	-0.261865	0.636	0.865	4.74147869933567e-14
Gm43305	2.07800868106958e-18	-0.288774	0.393	0.604	5.0564185236466e-14
Bptf	2.12728667763458e-18	-0.122901	0.634	0.91	5.17632667268823e-14
Il17rd	2.18904834155387e-18	-0.799634	0.079	0.266	5.32661132950303e-14
Rptor	2.20589026147961e-18	-0.170753	0.505	0.768	5.36759277325833e-14
Zdhhc9	2.20602090908423e-18	-0.718317	0.272	0.468	5.36791067807467e-14
Lrp10	2.36263361029849e-18	-0.495011	0.324	0.535	5.74899636393932e-14
Zfp182	2.36624205726607e-18	-0.257909	0.283	0.499	5.75777679794552e-14
Gpx2	2.44423287251644e-18	2.08249	0.116	0.033	5.94755184869426e-14
Plcxd3	2.45648649620235e-18	-1.60975	0.143	0.335	5.97736859120918e-14
Sipa1l2	2.49326334805545e-18	-0.468084	0.32	0.537	6.06685770482333e-14
Ehd1	2.51389098477036e-18	-0.881216	0.26	0.453	6.11705093324172e-14
Stk10	2.5813982437943e-18	-0.82664	0.225	0.428	6.28131634662466e-14
Pcsk6	2.58905429470689e-18	-0.415712	0.324	0.545	6.29994581531028e-14
Tmem87b	2.62232066439138e-18	-0.279209	0.455	0.693	6.38089287266354e-14
Hipk1	2.62831844055343e-18	-0.191537	0.636	0.901	6.39548726139865e-14
Kmt2e	2.67955804252796e-18	-0.125469	0.684	0.934	6.52016858488329e-14
Glg1	2.71463126524888e-18	-0.167533	0.688	0.922	6.6055122577301e-14
Slc12a2	2.72595918261571e-18	-0.301116	0.597	0.852	6.63307647905882e-14
Mapkap1	2.77818511887707e-18	-0.258709	0.593	0.848	6.76015784976357e-14
Apobec2	2.7963807476641e-18	-0.653477	0.202	0.417	6.80443327329106e-14
Gm15987	2.80857817786019e-18	-0.720819	0.108	0.313	6.8341132801872e-14
Prickle2	2.81174443394283e-18	-0.299363	0.116	0.317	6.84181773111308e-14
Fmnl2	2.84365478071926e-18	-0.313086	0.649	0.878	6.91946517792417e-14
Cavin3	2.84565546547448e-18	-0.281802	0.304	0.559	6.92433344413905e-14
Mkrn1	2.84980460451814e-18	-0.321289	0.41	0.625	6.93442954417398e-14
Parp4	2.85122990443128e-18	0.144536	0.435	0.674	6.93789772645262e-14
Arhgef10l	2.88922123448608e-18	-0.121843	0.222	0.44	7.03034202987499e-14
Cpeb2	2.9148305826011e-18	-0.396562	0.16	0.358	7.09265725664326e-14
1700025G04Rik	2.97896955036459e-18	-0.21636	0.726	0.934	7.24872660690216e-14
Cilk1	2.9967919639734e-18	-0.446504	0.301	0.527	7.29209388593647e-14
Zfp521	3.00720480588907e-18	-0.571426	0.227	0.444	7.31743145416988e-14
Scel	3.02918278760543e-18	-1.70669	0.054	0.224	7.3709104770803e-14
Dnase2a	3.12084211076165e-18	-0.443093	0.254	0.475	7.59394510811633e-14
Jmjd1c	3.1349241224067e-18	-0.24849	0.784	0.981	7.62821086705222e-14
Trim40	3.18554675660847e-18	-0.350193	0.044	0.217	7.75139092285538e-14
Zc3h3	3.40023455530248e-18	-0.215112	0.249	0.459	8.27379074341753e-14
H6pd	3.64830690197139e-18	-0.44787	0.27	0.477	8.87742518456698e-14
Mrtfa	3.66562777448842e-18	-0.207922	0.603	0.833	8.91957206366267e-14
Ing4	3.67765024855726e-18	0.3022	0.453	0.711	8.94882634981439e-14
Bcap29	3.72146372347487e-18	-0.297344	0.435	0.654	9.05543767833141e-14
Etl4	4.04072319517947e-18	-0.210138	0.869	0.993	9.8322917508302e-14
Ptgfrn	4.04306579415601e-18	-0.136254	0.447	0.698	9.83799199691981e-14
Dock7	4.12464786083095e-18	-0.178544	0.721	0.956	1.00365056397599e-13
Zfyve1	4.36730026774424e-18	-0.965535	0.177	0.367	1.06269517415021e-13
Tmem63a	4.37212036124881e-18	-0.276053	0.237	0.444	1.06386804750267e-13
Bcl2l15	4.47469729955029e-18	-0.402686	0.453	0.697	1.08882809389957e-13
Syt8	4.74779323788094e-18	-0.306475	0.202	0.4	1.15528052857357e-13
Crebbp	4.84461425378565e-18	-0.22324	0.726	0.959	1.17883998637366e-13
Irf2	5.05380817899128e-18	-0.159114	0.586	0.873	1.22974314419395e-13
Man2b1	5.15661954282152e-18	-0.244011	0.301	0.52	1.25476023335476e-13
Ccnd2	5.16254079501478e-18	1.78413	0.185	0.072	1.25620105165095e-13
Zzef1	5.30910736511589e-18	-0.295876	0.42	0.65	1.29186509515365e-13
Tspan3	5.37007767138294e-18	1.34752	0.293	0.144	1.30670099977761e-13
Pld3	5.4217200176981e-18	-0.288338	0.166	0.367	1.31926713190648e-13
Rpl27	5.47990242325021e-18	0.474815	0.773	0.932	1.33342465664947e-13
Cfap43	5.57318940241642e-18	-0.226889	0.073	0.254	1.35612417728999e-13
Slc39a8	5.58033947678416e-18	-0.103522	0.441	0.69	1.35786400488589e-13
Ltbp1	5.74665529487624e-18	-0.526742	0.158	0.36	1.39833363290223e-13
Cfap47	5.76621152541672e-18	-0.646225	0.177	0.371	1.40309225047965e-13
Tmprss2	5.85612914979246e-18	-0.413586	0.424	0.648	1.424971906019e-13
Cnot7	5.88608773772322e-18	-0.315579	0.416	0.655	1.43226172922019e-13
Sh3bp2	5.92487914794413e-18	-0.323031	0.139	0.337	1.44170084306924e-13
Dgat2	6.34232434302025e-18	-0.361465	0.659	0.876	1.54327778238712e-13
Ptgs1	6.37629926873995e-18	1.08263	0.27	0.124	1.55154490106249e-13
Ripk2	6.4281585321773e-18	0.185889	0.254	0.471	1.5641638156347e-13
Carmil1	6.59480490197685e-18	-0.134401	0.632	0.906	1.60471387679803e-13
Zfp703	6.65009424492451e-18	-0.314086	0.312	0.522	1.61816743261748e-13
R3hcc1l	6.7634848403917e-18	-0.151775	0.501	0.734	1.64575876621251e-13
F3	6.88332456475961e-18	-1.05459	0.489	0.688	1.67491936634296e-13
Fbxo38	6.94526170846113e-18	-0.250428	0.331	0.554	1.68999053151985e-13
Selenoh	7.04503336129336e-18	1.59374	0.432	0.313	1.71426796780351e-13
Tnfsf13os	7.7362618317369e-18	-0.599865	0.069	0.242	1.88246459151654e-13
Nexmif	7.91382551086853e-18	-0.493044	0.364	0.589	1.92567116155964e-13
Tspan12	7.92544264786482e-18	-0.466896	0.116	0.313	1.92849795950495e-13
Kif1b	7.9572443505815e-18	-0.124838	0.503	0.746	1.936236267827e-13
Lrba	8.01368374893195e-18	-0.147959	0.8	0.974	1.94996966662761e-13
Vezt	8.05183414912412e-18	-0.188186	0.372	0.585	1.95925280350637e-13
Prss32	8.73551475248175e-18	-0.896194	0.048	0.218	2.12561280472138e-13
Nup98	9.31984921234481e-18	-0.137686	0.536	0.796	2.26779890883986e-13
Psme2	9.41444873832419e-18	-0.125257	0.551	0.787	2.29081781149642e-13
Csnk1g3	1.00595597936889e-17	-0.140919	0.553	0.793	2.44779268459831e-13
R3hdm1	1.01764618332456e-17	-0.22258	0.613	0.886	2.47623845788366e-13
Nt5c2	1.03751401795916e-17	-0.278889	0.759	0.953	2.52458285990004e-13
Lats1	1.06363854518284e-17	-0.321403	0.478	0.708	2.58815167199341e-13
Fam184b	1.08033396470535e-17	-0.53039	0.212	0.419	2.62877663631754e-13
Ppp2r2c	1.13576519665986e-17	1.72872	0.123	0.036	2.76365745303243e-13
Dot1l	1.14819559278128e-17	-0.274832	0.445	0.696	2.79390433591469e-13
Gpi1	1.1526347155738e-17	-0.254324	0.489	0.717	2.80470605340574e-13
D17H6S56E-5	1.18231172804207e-17	-0.360061	0.447	0.69	2.87691912784477e-13
Sorcs2	1.18485528321258e-17	-0.573843	0.081	0.263	2.88310836064116e-13
Cadm4	1.19785762472583e-17	-0.894925	0.208	0.4	2.91474695824536e-13
Pyroxd1	1.23384161069724e-17	-0.265476	0.289	0.504	3.00230679130959e-13
Senp2	1.24796036977027e-17	-0.144129	0.497	0.74	3.036661967762e-13
Tsc1	1.2581300002234e-17	-0.426933	0.283	0.48	3.06140772954361e-13
Zfp516	1.30152552832513e-17	-0.337155	0.339	0.555	3.16700206807353e-13
Tmem51	1.30700967474361e-17	-0.308718	0.31	0.51	3.18034664155362e-13
Ppp2ca	1.34645928961927e-17	-0.213648	0.626	0.896	3.27633938943057e-13
Rpl37a	1.44193499952126e-17	0.454563	0.786	0.933	3.50866043433509e-13
Fam20a	1.47482976186043e-17	-0.910451	0.127	0.316	3.58870325953498e-13
Asap2	1.49009200508284e-17	-0.143473	0.59	0.837	3.62584087596806e-13
Gdpd5	1.49290809106197e-17	-0.217283	0.324	0.534	3.63269325798109e-13
Hectd4	1.54599748630999e-17	-0.119428	0.401	0.616	3.76187568343809e-13
Prkcd	1.59495553743534e-17	-0.100442	0.358	0.548	3.88100530924141e-13
Efhd2	1.67121076836085e-17	0.118029	0.511	0.74	4.06655716265245e-13
Washc2	1.69362479956951e-17	0.18258	0.486	0.72	4.12109722479248e-13
Stk24	1.7102258648421e-17	-0.146021	0.601	0.873	4.16149259692029e-13
Clec16a	1.72546126252214e-17	0.1282	0.345	0.559	4.19856489009511e-13
Serbp1	1.76871524219097e-17	0.523545	0.746	0.933	4.30381479882328e-13
Thrb	1.77504584926902e-17	-0.218022	0.239	0.46	4.31921906502632e-13
Cracd	1.79081463161996e-17	1.69613	0.079	0.017	4.35758924312084e-13
Il6ra	1.81863650036482e-17	-0.210017	0.143	0.339	4.42528819633772e-13
Tmem127	1.84516776770701e-17	-0.155371	0.32	0.54	4.48984672916146e-13
Dpysl2	1.86154867641749e-17	1.63791	0.16	0.057	4.52970639432669e-13
Rnmt	1.89891719282896e-17	-0.226821	0.389	0.607	4.62063520531071e-13
Hnrnpu	2.01138359302825e-17	0.459648	0.827	0.974	4.89429969691563e-13
Sp110	2.01630677772464e-17	-0.613839	0.183	0.376	4.90627928223736e-13
Mroh1	2.12492072149896e-17	-0.282275	0.256	0.466	5.17056959162343e-13
Plaur	2.16580224037548e-17	-1.34993	0.139	0.322	5.27004659150565e-13
Pcdh19	2.22442942678032e-17	-0.752803	0.033	0.193	5.41270412418455e-13
Diaph1	2.36232922642446e-17	-0.189383	0.686	0.925	5.74825570665863e-13
Sh3d19	2.45375423869143e-17	-0.289688	0.726	0.959	5.97072018900787e-13
Clybl	2.52036694975736e-17	-0.188214	0.293	0.513	6.13280889884459e-13
Map2k5	2.70707191169803e-17	-0.243494	0.478	0.722	6.58711808273481e-13
Gtf2ird1	2.73216780322447e-17	-0.334757	0.391	0.609	6.64818391558611e-13
Oga	2.83385460271594e-17	-0.169314	0.696	0.939	6.89561840478869e-13
Cep57l1	2.83868129750401e-17	2.06974	0.083	0.019	6.90736320121651e-13
Sbf2	2.93194049221785e-17	-0.158973	0.611	0.878	7.1342907997137e-13
Glmp	3.413934847433e-17	-0.306263	0.308	0.511	8.30712766425871e-13
Set	3.53427969401618e-17	0.717873	0.719	0.902	8.59996277944958e-13
mt-Co1	3.6347952058107e-17	-0.204994	0.933	0.999	8.84454717429919e-13
Sema3f	3.65331252129267e-17	-0.257208	0.304	0.499	8.88960535806145e-13
Ehd4	3.65482750038033e-17	-0.455464	0.445	0.686	8.89329175667545e-13
Magi3	3.74733846412506e-17	-0.213139	0.678	0.901	9.1183986847555e-13
Cog3	3.99845512711455e-17	-0.369766	0.349	0.571	9.72944086080783e-13
Tgoln1	4.13178858125066e-17	-0.244762	0.482	0.709	1.00538811547572e-12
Sema6d	4.22453464636204e-17	-1.55295	0.098	0.275	1.02795601549927e-12
Pde9a	4.38896595461971e-17	-0.635105	0.071	0.241	1.06796708573761e-12
Usp4	4.40629451866003e-17	-0.361776	0.435	0.647	1.07218364522555e-12
Wnt7a	4.44927439401864e-17	-0.268517	0.372	0.593	1.08264193829655e-12
Prr14l	4.48056470241539e-17	-0.105335	0.59	0.854	1.09025580903874e-12
Zmym5	4.51561882949818e-17	-0.17579	0.489	0.723	1.09878552978179e-12
Arhgef17	4.52480556046211e-17	-0.336841	0.258	0.457	1.10102093702725e-12
Cds1	4.70044172246036e-17	-0.419948	0.231	0.432	1.14375848432628e-12
Cep128	4.76756423551996e-17	1.8574	0.289	0.152	1.16009140542907e-12
Chic2	4.78074404468093e-17	-0.326526	0.52	0.746	1.16329844839221e-12
Tgfbi	4.84885672125264e-17	0.996064	0.264	0.122	1.17987230598241e-12
Creb3l1	5.07207761540033e-17	-0.212021	0.146	0.341	1.23418864615536e-12
Iqsec2	5.22900053331256e-17	-0.308227	0.268	0.47	1.27237269977094e-12
Rasa4	5.55897256450967e-17	-0.176499	0.198	0.413	1.35266479412214e-12
Ahcyl1	5.61315910144487e-17	-0.182673	0.532	0.787	1.36585000415458e-12
Osbpl11	5.67604571202754e-17	-0.251031	0.312	0.51	1.38115220310766e-12
Zfp654	5.78217119948415e-17	-0.101127	0.455	0.689	1.40697571797048e-12
Cfh	6.0483194893815e-17	-0.246357	0.809	0.958	1.4717375813512e-12
Ap2a2	6.06615962658726e-17	-0.155252	0.437	0.655	1.47607862193748e-12
Fut2	6.63611204689926e-17	-0.288809	0.478	0.69	1.614765144372e-12
Gabarap	6.6441621319098e-17	-0.208843	0.613	0.841	1.61672397155761e-12
Gigyf2	6.64723990319615e-17	-0.10837	0.657	0.907	1.61747288564472e-12
Phlpp1	6.65802969685015e-17	-0.125433	0.58	0.846	1.62009836613455e-12
Irak4	6.85769794525421e-17	-0.398863	0.328	0.531	1.66868364101871e-12
Pcolce2	6.87141932983902e-17	1.03253	0.362	0.203	1.67202246552973e-12
Robo1	6.96910078072289e-17	-0.29982	0.738	0.911	1.6957912929733e-12
Cmc2	7.43678554243811e-17	2.10505	0.2	0.084	1.80959302604147e-12
Il36b	7.98934526351473e-17	-0.268736	0.143	0.334	1.94404738297104e-12
Gtf3c1	8.05660079872577e-17	-0.104011	0.499	0.721	1.96041267235394e-12
Kat2b	8.08260181753653e-17	-0.141976	0.416	0.642	1.96673950026116e-12
Atl3	8.10543690029659e-17	-0.249946	0.43	0.653	1.97229596094917e-12
Tm9sf4	8.17566086970188e-17	-0.301108	0.541	0.766	1.98938355942456e-12
Asrgl1	8.20164401385873e-17	1.60952	0.175	0.066	1.99570603789224e-12
Tbc1d12	8.29098933574689e-17	-0.204523	0.281	0.49	2.01744643506729e-12
Trafd1	8.32949674521142e-17	0.297609	0.218	0.425	2.02681644301229e-12
Phf19	8.56265385371166e-17	4.51569	0.025	0.001	2.08355056222366e-12
Pawr	8.75130788410993e-17	-0.211382	0.634	0.881	2.12945574744047e-12
Lmbrd1	8.79119903788447e-17	0.303159	0.258	0.465	2.13916246188843e-12
Isoc2a	8.91149213269834e-17	-0.807565	0.143	0.329	2.16843338064949e-12
Fzd7	8.95034880850337e-17	-0.493586	0.033	0.189	2.17788837557313e-12
Zfp827	8.98442841980634e-17	-0.172215	0.663	0.897	2.18618096739148e-12
Bicra	9.02210051865158e-17	-0.317757	0.333	0.536	2.19534771920349e-12
Txndc9	9.65074394787265e-17	-0.186485	0.462	0.7	2.34831552483585e-12
H3c8	9.72692323519633e-17	4.65557	0.029	0.002	2.36685223082032e-12
Ifih1	1.01679658337173e-16	-0.250568	0.328	0.543	2.47417112631842e-12
Atf6	1.04810859543622e-16	-0.192136	0.459	0.705	2.55036264527495e-12
Clcn3	1.05208866476592e-16	-0.204003	0.545	0.816	2.56004734797491e-12
Sgms2	1.10691269420896e-16	-0.688596	0.69	0.925	2.69345065881867e-12
Krt13	1.16024638236418e-16	2.12813	0.091	0.023	2.82322752220676e-12
Golm1	1.18758493244558e-16	-0.157839	0.445	0.782	2.88975041611984e-12
Kidins220	1.18768212678508e-16	-0.127237	0.428	0.645	2.88998691910614e-12
Ell	1.20135244609152e-16	-0.501855	0.252	0.444	2.92325090707449e-12
Suv39h2	1.28005598695777e-16	1.67666	0.141	0.048	3.11476023306434e-12
Ptpn2	1.28868097269855e-16	-0.188664	0.486	0.717	3.13574741086738e-12
Mcu	1.33391336729109e-16	-0.128252	0.572	0.809	3.24581139662941e-12
Ift43	1.41247194947664e-16	-0.288765	0.405	0.62	3.43696799466151e-12
Rnf183	1.43308754469997e-16	-0.358409	0.054	0.215	3.48713192251843e-12
Tob1	1.4990316823051e-16	0.139011	0.304	0.503	3.64759379255301e-12
Melk	1.58944919449612e-16	2.00482	0.249	0.122	3.8676067249674e-12
H2ac11	1.61123263908029e-16	3.05499	0.048	0.006	3.92061238067407e-12
Spty2d1	1.72129451449708e-16	-0.236125	0.428	0.647	4.18842594212574e-12
L3mbtl3	1.73314316368368e-16	-0.234209	0.462	0.702	4.2172572601915e-12
Clint1	1.74635298229782e-16	-0.178979	0.892	0.997	4.24940071182529e-12
Mical3	1.81569251768387e-16	-0.10873	0.609	0.869	4.41812460328016e-12
Sema3a	1.837243362653e-16	-0.349834	0.555	0.759	4.47056427434354e-12
Avpi1	1.85836659569805e-16	-0.12063	0.418	0.633	4.52196343731205e-12
Rbpms	1.90200158340097e-16	-0.197236	0.52	0.78	4.62814045288958e-12
2810408I11Rik	1.9048611185913e-16	1.63669	0.091	0.023	4.63509855986822e-12
Rps26	1.96781605190518e-16	0.483529	0.771	0.942	4.78828679910086e-12
Sfn	2.00382383237979e-16	-0.621869	0.484	0.693	4.87590453132975e-12
Acp5	2.00488056241554e-16	0.160737	0.233	0.435	4.87847587252573e-12
Ubtd2	2.02746404969079e-16	-0.531174	0.235	0.415	4.93342827211261e-12
Chfr	2.05405947562898e-16	-0.132105	0.42	0.635	4.998142922048e-12
Pdlim4	2.05621302500467e-16	0.223588	0.399	0.607	5.00338315374385e-12
Gm56730	2.17948837469324e-16	-0.258501	0.187	0.373	5.30334906214105e-12
Sting1	2.180381768036e-16	-0.16103	0.416	0.647	5.30552295616201e-12
Cpeb3	2.24285071015843e-16	-0.596324	0.141	0.326	5.4575286330285e-12
Incenp	2.31982584540631e-16	1.94358	0.362	0.225	5.64483222962716e-12
Nav1	2.33219249466924e-16	-0.326647	0.657	0.868	5.67492399727865e-12
Prkab1	2.34408192920379e-16	-0.295459	0.41	0.639	5.70385455833157e-12
Fhit	2.42274218151507e-16	-0.281287	0.362	0.614	5.89525855028061e-12
Wasf2	2.48389920001894e-16	-0.138731	0.649	0.917	6.0440719234061e-12
Stc2	2.5385142403084e-16	-0.151331	0.387	0.603	6.17696670094242e-12
Parp6	2.57986767733939e-16	-0.428841	0.189	0.378	6.27759201926993e-12
Ccdc71l	2.63924158152891e-16	-0.354504	0.198	0.385	6.42206654033429e-12
Eya3	2.66010367638771e-16	-0.124594	0.447	0.652	6.47283027575421e-12
Spg11	2.72907147390503e-16	-0.169955	0.316	0.526	6.64064961745311e-12
Cda	2.78647359097193e-16	-0.168777	0.268	0.467	6.78032618891201e-12
Nfkbib	2.92156841110135e-16	-0.673677	0.133	0.304	7.10905241473293e-12
Rsf1	2.93282816012801e-16	-0.120146	0.692	0.933	7.13645076203948e-12
Kif2a	2.97817368078358e-16	-0.137077	0.553	0.815	7.24679001745069e-12
Klhl2	3.1385344622526e-16	-0.114306	0.555	0.784	7.63699590699925e-12
Crim1	3.18587532333041e-16	-0.534339	0.301	0.499	7.75219042425989e-12
Riok3	3.18963754122858e-16	-0.15406	0.59	0.82	7.7613450290715e-12
Fuca2	3.3247084246353e-16	-0.326799	0.405	0.602	8.09001300966507e-12
Socs2	3.3328967984574e-16	0.111954	0.247	0.45	8.10993777968639e-12
Prim2	3.35910224867693e-16	1.73391	0.283	0.152	8.17370350170556e-12
Enox2	3.35976677927515e-16	-0.242317	0.399	0.641	8.17532050401023e-12
2610035D17Rik	3.44641762553151e-16	-0.334374	0.576	0.782	8.38616800820582e-12
Tcim	3.46151637470296e-16	-0.352114	0.432	0.642	8.4229077945647e-12
Ust	3.61539617697575e-16	-0.407067	0.328	0.54	8.7973435174351e-12
Trim34a	3.68465958984975e-16	-0.39358	0.141	0.319	8.9658821799814e-12
Smad4	3.70652272877232e-16	0.10007	0.603	0.856	9.01908175592168e-12
Gm35439	3.72341641592615e-16	-1.22668	0.102	0.271	9.0601891648731e-12
Ikzf2	3.80814552877683e-16	-0.154787	0.632	0.872	9.26636051517266e-12
Chd1	3.81889127688638e-16	-0.145833	0.624	0.874	9.29250814404762e-12
Nopchap1	3.8232228645654e-16	-0.283648	0.607	0.83	9.30304819634699e-12
Upp2	3.87855405397117e-16	-0.628087	0.249	0.434	9.43768557952805e-12
Syce2	3.87943304118404e-16	1.4933	0.268	0.138	9.43982441911311e-12
Ocrl	3.99287375824194e-16	-0.80495	0.222	0.409	9.71585971593011e-12
Vgll4	4.00363262622984e-16	-0.140438	0.593	0.837	9.74203926940508e-12
Zfp808	4.00719859722529e-16	1.95032	0.189	0.079	9.7507163466283e-12
Sh3yl1	4.14169016314504e-16	-0.284367	0.318	0.532	1.00779746739808e-11
Rpl36	4.47942952077541e-16	0.544434	0.771	0.935	1.08997958529028e-11
Pard3	4.56046065275928e-16	-0.15589	0.707	0.96	1.10969689063592e-11
Rbms1	4.65976213628382e-16	-0.222097	0.667	0.922	1.13385992062194e-11
Aarsd1	4.94565410873621e-16	1.25292	0.356	0.213	1.20342601427878e-11
Pdlim1	5.07066640900918e-16	-0.233722	0.672	0.926	1.2338452573042e-11
Fam107b	5.1925467823581e-16	-0.599854	0.563	0.792	1.2635024085512e-11
Eml4	5.32473470365249e-16	-0.276114	0.832	0.989	1.29566769543976e-11
Ugdh	5.36661854463041e-16	-0.306292	0.277	0.504	1.30585929046492e-11
Gbe1	5.37986921780743e-16	-0.140948	0.245	0.447	1.30908357676908e-11
Mark2	5.42471214595337e-16	-0.154131	0.64	0.908	1.31999520647483e-11
Dpp8	5.46894242514539e-16	-0.203897	0.476	0.71	1.33075776031063e-11
Gbp7	5.47776587593128e-16	-0.514734	0.206	0.403	1.33290477059036e-11
Tcn2	5.74147882274258e-16	-0.298979	0.112	0.296	1.39707404193795e-11
Selenoi	5.81913183588209e-16	-0.229999	0.368	0.562	1.41596934962519e-11
Rnf180	5.95415729080802e-16	-0.479422	0.476	0.69	1.44882509357232e-11
Rps16	6.01681732680778e-16	0.467244	0.784	0.943	1.46407216013214e-11
Krt20	6.03407273123857e-16	-1.10736	0.062	0.22	1.46827091769228e-11
Kdm4b	6.09523032996186e-16	-0.120785	0.185	0.371	1.48315239618962e-11
Desi2	6.25691805398903e-16	-0.29923	0.374	0.584	1.52249587007715e-11
Wdr26	6.26908666071665e-16	-0.193767	0.601	0.878	1.52545685715218e-11
Usp40	6.56620343681329e-16	-0.158256	0.335	0.534	1.59775428227978e-11
Erbb4	6.64468371985823e-16	-0.129584	0.368	0.601	1.6168508895531e-11
Tax1bp1	6.6617677969158e-16	-0.140823	0.642	0.901	1.62100795802352e-11
Tafazzin	6.70784187650251e-16	-0.4047	0.353	0.537	1.63221916380936e-11
Dync1li2	6.92350300955401e-16	-0.141431	0.526	0.754	1.68469598731478e-11
Zfp36l1	6.92642933268156e-16	-0.206282	0.769	0.941	1.6854080495214e-11
Map3k14	6.9423979764231e-16	-0.67477	0.287	0.473	1.68929369960303e-11
Sdcbp2	7.11730577578812e-16	-0.586653	0.141	0.311	1.73185401442252e-11
Crtc3	7.16194018022068e-16	-0.361448	0.36	0.566	1.7427149040531e-11
Nck2	7.17882506826348e-16	-0.166229	0.532	0.781	1.74682350386055e-11
Cyb5r4	7.3351747913391e-16	-0.152882	0.437	0.662	1.78486808197654e-11
Ptges3	7.36143253839995e-16	0.863321	0.678	0.841	1.79125737956886e-11
Mphosph6	7.61432818600396e-16	-0.283142	0.407	0.607	1.85279447750034e-11
Slc38a9	7.61785324088535e-16	-0.396102	0.208	0.395	1.85365222910463e-11
Rasgef1b	7.94668103500091e-16	-0.688085	0.146	0.321	1.93366589624677e-11
Fam174b	8.02206877126022e-16	-0.592606	0.137	0.314	1.95200999411075e-11
Lsm3	8.13524676758232e-16	1.47809	0.397	0.284	1.97954959595581e-11
Acat2	8.16369820260232e-16	1.16896	0.239	0.111	1.98647268363922e-11
Bspry	8.19249215538673e-16	-0.188867	0.543	0.792	1.99347911617025e-11
Snx9	8.22122592523284e-16	-0.139884	0.514	0.763	2.00047090438691e-11
Gmds	8.29942843766832e-16	-0.262018	0.763	0.961	2.01949992173783e-11
Klf13	8.39949126226681e-16	-0.206879	0.518	0.758	2.04384820884738e-11
Abcd3	8.59163447460099e-16	-0.235993	0.516	0.752	2.09060241670466e-11
Rnf150	8.69520051323992e-16	-0.120252	0.356	0.593	2.11580314088667e-11
Magi1	8.75296545863696e-16	-0.193283	0.782	0.977	2.12985908505013e-11
AI506816	9.11250782095162e-16	1.24502	0.405	0.267	2.21734652807216e-11
Tmem243	9.14641182977964e-16	-0.434652	0.133	0.313	2.22559639054028e-11
Ces1d	9.17183215712307e-16	-0.542091	0.204	0.401	2.23178191879276e-11
Tesc	9.25845926400651e-16	2.0125	0.087	0.022	2.2528608927107e-11
Fbln1	9.57824706679388e-16	-0.208112	0.534	0.767	2.33067485876295e-11
Clpx	9.60360783461712e-16	-0.387758	0.349	0.55	2.33684589439738e-11
Hdac7	9.66772070083174e-16	-0.162404	0.37	0.576	2.35244647813339e-11
Bche	9.72842569738071e-16	1.53155	0.173	0.068	2.36721782494365e-11
Jup	9.78707520348114e-16	-0.285403	0.534	0.778	2.38148900926307e-11
Slc39a11	9.89060751732064e-16	-0.221108	0.478	0.686	2.40668152718963e-11
Znrf1	1.00431560370337e-15	-0.272398	0.626	0.889	2.44380115849141e-11
Foxred2	1.00936613461104e-15	2.05121	0.071	0.015	2.45609061534906e-11
Ifit1	1.02321412087116e-15	-0.938272	0.187	0.374	2.48978692031579e-11
Ssh2	1.02453987072082e-15	-0.207574	0.609	0.848	2.49301286742497e-11
Tmprss11g	1.05181563970386e-15	-0.420366	0.102	0.272	2.55938299609139e-11
Dhx57	1.06716136202602e-15	0.254015	0.383	0.6	2.59672374221792e-11
Cpsf7	1.09162999858431e-15	-0.277341	0.414	0.619	2.65626327555519e-11
Naip2	1.12186607652738e-15	-0.27603	0.252	0.453	2.72983672401406e-11
Snrk	1.13117922157053e-15	-0.467929	0.239	0.429	2.75249839984758e-11
Sema3e	1.19590723454622e-15	-0.199212	0.293	0.508	2.91000107382132e-11
Mybl1	1.22959181474835e-15	1.56466	0.162	0.062	2.99196576282715e-11
Prpf38b	1.25004608921629e-15	-0.108058	0.68	0.918	3.04173714888999e-11
Gemin6	1.28107735333211e-15	1.38892	0.162	0.062	3.11724552386303e-11
Atg14	1.37406705186109e-15	-0.125521	0.229	0.425	3.34351735729359e-11
Lgals3	1.42989701489874e-15	-0.445372	0.422	0.625	3.4793684063531e-11
Pan3	1.44485960949092e-15	-0.136557	0.728	0.955	3.51577688777425e-11
Gm42031	1.44700098780262e-15	-0.227967	0.289	0.49	3.52098750362012e-11
Traf3	1.49101684567077e-15	-0.255841	0.453	0.686	3.62809129057067e-11
Creb1	1.51065883508931e-15	-0.267064	0.526	0.759	3.67588614342281e-11
Tspan13	1.52725658010476e-15	2.5381	0.069	0.014	3.71627343636892e-11
Rpl14	1.52734073625027e-15	0.498232	0.757	0.936	3.71647821351779e-11
Nup107	1.57694700044415e-15	1.52184	0.281	0.146	3.83718513618075e-11
Akt2	1.5999421446355e-15	-0.224737	0.295	0.475	3.89313922054155e-11
Myo18a	1.61215400898313e-15	-0.115263	0.541	0.776	3.92285435005865e-11
Lsm2	1.67131168376021e-15	1.44656	0.435	0.327	4.06680272009373e-11
Tlk2	1.68718639212992e-15	-0.306054	0.584	0.84	4.10543064796973e-11
Xkr6	1.7651469461275e-15	-0.453153	0.312	0.505	4.29513206401204e-11
Fnbp1l	1.79199919794391e-15	-0.100429	0.709	0.952	4.36047164835691e-11
Prkci	1.80352294532291e-15	-0.342915	0.43	0.628	4.38851238285425e-11
Cyp21a1	1.83701475631149e-15	-0.465268	0.108	0.278	4.47000800653276e-11
Ppm1a	1.85467475705814e-15	-0.123585	0.497	0.727	4.51298008634956e-11
Ankrd50	1.88415196533748e-15	-0.652682	0.181	0.355	4.58470697725569e-11
Dennd2d	1.88681691276184e-15	-0.237492	0.335	0.524	4.5911915938234e-11
B2m	1.93389194819111e-15	-0.272643	0.688	0.909	4.70573927753342e-11
Crb3	1.96320480279653e-15	-0.373981	0.368	0.556	4.77706624664479e-11
Hdac4	1.99272433432117e-15	-0.121718	0.541	0.789	4.84889612270371e-11
Mmp14	2.01518566341326e-15	-0.233087	0.414	0.622	4.90355127478348e-11
Myo1c	2.03878205714144e-15	-0.546177	0.268	0.454	4.96096837964226e-11
Mal	2.0680758012413e-15	-0.243483	0.468	0.691	5.03224884716045e-11
Rspry1	2.12424828752271e-15	-0.327354	0.397	0.601	5.16893335802901e-11
Hmgn2	2.16502848928687e-15	1.50365	0.464	0.37	5.26816382298175e-11
Tbc1d2b	2.18702816121273e-15	-0.123654	0.279	0.468	5.32169562467893e-11
Marchf8	2.18769095791619e-15	-0.25883	0.466	0.677	5.32330840789747e-11
Acadm	2.2038351391765e-15	-0.225898	0.36	0.561	5.36259204415818e-11
Heatr5a	2.25879084337432e-15	0.141816	0.603	0.826	5.49631575918273e-11
Clu	2.265749096713e-15	-0.274779	0.295	0.5	5.51324727703175e-11
Ckb	2.47556425437013e-15	0.920695	0.256	0.124	6.02379050015883e-11
Cwf19l2	2.48057472874335e-15	-0.122586	0.426	0.644	6.0359824874512e-11
Slfn2	2.49853238090849e-15	-0.428511	0.239	0.426	6.07967884246463e-11
H2bc3	2.5039272454118e-15	2.52843	0.062	0.012	6.09280616626053e-11
Tut7	2.63197299312491e-15	-0.113115	0.651	0.916	6.40437988417084e-11
Pla2g7	2.65151226882194e-15	0.863795	0.385	0.225	6.45192480372443e-11
Pcp4l1	2.75998811224536e-15	-0.526901	0.116	0.291	6.71587907352663e-11
Pum1	2.78751448477761e-15	-0.12525	0.748	0.958	6.78285899580937e-11
Ifi211	2.84449004605651e-15	-0.316271	0.064	0.219	6.9214976290693e-11
Atp11b	2.95127160755436e-15	-0.140561	0.534	0.763	7.18132920266201e-11
Fbxl17	2.96040877108694e-15	-0.20237	0.69	0.922	7.20356266268585e-11
Bcorl1	3.0354538278712e-15	-0.337235	0.254	0.44	7.38616979935898e-11
Fam120b	3.29456279708702e-15	-0.185691	0.326	0.51	8.01665965415186e-11
Foxq1	3.50479987255886e-15	-0.269051	0.05	0.199	8.52822952989748e-11
Virma	3.70177105681313e-15	-0.318472	0.43	0.647	9.00751951254339e-11
Exosc8	3.76567074847214e-15	1.62283	0.389	0.265	9.16300663225725e-11
Rassf3	3.76997407030537e-15	-0.148039	0.551	0.816	9.17347790527406e-11
Tap2	3.78723862487333e-15	-0.271212	0.1	0.261	9.21548774590428e-11
Gm26756	4.04371735617432e-15	-0.315459	0.064	0.219	9.83957744277897e-11
Rnf114	4.04926456740049e-15	-0.239144	0.337	0.543	9.8530754718556e-11
Ube2f	4.12558459110345e-15	-0.453456	0.385	0.586	1.0038784985532e-10
Vsig10	4.17762422653252e-15	-0.200767	0.393	0.588	1.01654130304216e-10
Pcgf5	4.27838438802206e-15	-0.169956	0.376	0.577	1.04105927313741e-10
Arl6ip5	4.31681116090149e-15	-0.318523	0.437	0.629	1.05040965978216e-10
B230307C23Rik	4.44891839545201e-15	-0.340983	0.326	0.517	1.08255531316534e-10
Esrp1	4.54648969858543e-15	-0.106685	0.62	0.891	1.10629733835679e-10
1810064F22Rik	4.58004879991514e-15	-0.705689	0.046	0.189	1.11446327448335e-10
Tet3	4.61525269299989e-15	-0.177238	0.551	0.801	1.12302943778766e-10
Srgn	4.63386788706222e-15	-0.144207	0.108	0.29	1.12755907295885e-10
Gins3	4.63746541785265e-15	1.46392	0.133	0.046	1.12843446012609e-10
Rap2b	4.7512943280459e-15	-0.461064	0.185	0.365	1.15613244884341e-10
Glb1	4.75300423839275e-15	-0.127313	0.324	0.521	1.15654852132811e-10
Rps2	4.78882353252585e-15	0.67162	0.759	0.926	1.16526443016951e-10
Smyd3	4.83971784344499e-15	-0.127436	0.538	0.796	1.17764854284547e-10
Gen1	4.84505704406713e-15	1.76874	0.148	0.055	1.17894773053285e-10
Ifi204	4.88081410133975e-15	-0.411665	0.081	0.244	1.187648495279e-10
Rev3l	4.88175359609706e-15	-0.141157	0.788	0.975	1.1878771025383e-10
BC048679	4.96630769980971e-15	1.13903	0.345	0.2	1.2084516525947e-10
Nktr	5.04180188056417e-15	-0.17131	0.684	0.937	1.22682165159768e-10
Arhgap27	5.10985502084967e-15	-0.203893	0.368	0.562	1.24338102222335e-10
Usf3	5.19134225552916e-15	-0.223905	0.403	0.6	1.26320931103791e-10
Ppp4r1l-ps	5.20130491767719e-15	-0.2848	0.206	0.392	1.26563352561839e-10
Apbb3	5.35955187456751e-15	-1.02099	0.077	0.23	1.30413975763851e-10
Net1	5.43212026575907e-15	-0.365161	0.553	0.785	1.32179782426716e-10
Galnt10	5.43524408085528e-15	-0.533442	0.412	0.611	1.32255794219452e-10
Elovl7	5.86953252254598e-15	-0.370307	0.216	0.402	1.42823334871111e-10
Mcm9	5.88468045197702e-15	-0.34219	0.362	0.562	1.43191929437957e-10
Rps18	5.93420815538333e-15	0.550073	0.732	0.908	1.44397087044943e-10
Ptpn18	5.93441664855465e-15	-0.21981	0.389	0.59	1.4440216030928e-10
Cbr4	5.95830416116029e-15	-0.151592	0.206	0.383	1.44983415153513e-10
Icam1	6.03790846922479e-15	-2.18296	0.033	0.171	1.46920426781647e-10
Exoc4	6.0888161160902e-15	-0.191989	0.665	0.931	1.48159162552823e-10
Trim35	6.41497562102187e-15	1.28226	0.162	0.063	1.56095601786325e-10
Tlr2	6.50209710513744e-15	-1.68376	0.054	0.198	1.58215528859309e-10
E130102H24Rik	6.57523177925792e-15	0.168378	0.077	0.233	1.59995114884683e-10
Zmym6	6.58051547182315e-15	-0.516747	0.202	0.385	1.60123682975873e-10
Prdm2	6.92094633609167e-15	-0.138776	0.551	0.817	1.68407387196119e-10
Sgpl1	7.36714531075643e-15	0.178385	0.378	0.597	1.79264746846636e-10
Cxcl1	7.45784827358649e-15	-3.29401	0.017	0.143	1.8147182204118e-10
Snx14	7.56255767750213e-15	-0.154892	0.36	0.564	1.84019715966659e-10
Tgfa	7.6212067597595e-15	-0.362918	0.266	0.436	1.85446824085228e-10
Cyba	7.67626734934508e-15	-0.240748	0.672	0.879	1.86786613411614e-10
Mpdz	7.70253055906652e-15	1.70596	0.1	0.029	1.87425676093766e-10
Rufy3	7.94773397452115e-15	-0.221341	0.401	0.614	1.93392210802023e-10
Rabgef1	7.99659320997474e-15	-0.253558	0.491	0.73	1.94581102578315e-10
Ptpn14	8.02648415711408e-15	-0.195442	0.43	0.65	1.95308438995057e-10
Fgl2	8.12489177358755e-15	-0.435633	0.295	0.478	1.97702991526706e-10
Tbc1d5	8.16952319689177e-15	-0.102977	0.607	0.845	1.98789007949968e-10
Esrra	8.25634344023656e-15	-0.451287	0.225	0.401	2.00901604931276e-10
Atp13a3	8.29913161309381e-15	-0.304003	0.532	0.778	2.01942769541412e-10
Tedc2	8.69492778381927e-15	1.70084	0.083	0.021	2.11573677763674e-10
Mpp7	8.76251650229699e-15	-0.127947	0.655	0.901	2.13218314050393e-10
Zcchc7	8.96346732113932e-15	-0.200388	0.823	0.987	2.18108050325283e-10
Tmem65	9.09272531509274e-15	-0.304126	0.277	0.457	2.21253285092152e-10
Haus8	9.29750989179832e-15	1.46281	0.247	0.125	2.26236308197129e-10
Lsm5	9.45850590819015e-15	1.4719	0.405	0.285	2.30153824263991e-10
P4ha2	9.45994119941648e-15	-0.90707	0.204	0.376	2.30188749205401e-10
Plcg2	9.56181143626991e-15	-0.468884	0.279	0.459	2.32667557678756e-10
Nrbp1	9.5983129490886e-15	-0.166044	0.368	0.551	2.33555748990173e-10
Ythdc1	9.74030940318805e-15	-0.310841	0.769	0.969	2.37010948707775e-10
Clca3a1	9.74204621012774e-15	-0.589397	0.035	0.178	2.37053210431038e-10
Mmp15	1.01079264470876e-14	-0.607271	0.16	0.332	2.45956174236981e-10
Deptor	1.01752718085823e-14	-0.33322	0.243	0.426	2.47594888918233e-10
Tex15	1.02703925537931e-14	1.82999	0.123	0.041	2.49909462011448e-10
Plekhg6	1.03410914546077e-14	-0.758754	0.046	0.188	2.51629778364969e-10
Pcdh1	1.03745623458622e-14	-0.742409	0.127	0.289	2.52444225561864e-10
Stx11	1.05755896061343e-14	-1.51537	0.044	0.185	2.57335821886066e-10
Cdkal1	1.07323891458055e-14	-0.209922	0.601	0.845	2.61151225084886e-10
Cdc42ep2	1.09843610318327e-14	-0.662217	0.166	0.338	2.67282456987586e-10
Ifrd1	1.10026054838375e-14	-1.11226	0.514	0.725	2.67726399238217e-10
Chst8	1.15332082292706e-14	-0.222511	0.36	0.576	2.80637555842841e-10
Ccnt1	1.16181341039035e-14	-0.182363	0.489	0.733	2.82704057150285e-10
Jun	1.2003336553951e-14	-0.40557	0.634	0.852	2.9207718836729e-10
Tank	1.22756006240513e-14	-0.28426	0.372	0.567	2.9870218998504e-10
Poc1a	1.22760671383996e-14	2.46726	0.116	0.038	2.98713541678678e-10
Mideas	1.26419898424347e-14	-0.245235	0.391	0.583	3.07617538835962e-10
Runx1	1.27104315271273e-14	-0.125246	0.559	0.771	3.0928293034959e-10
Uba7	1.28856220599888e-14	-0.270278	0.146	0.314	3.13545841585708e-10
A330023F24Rik	1.29122557916096e-14	0.204638	0.189	0.382	3.14193920177237e-10
Fnip2	1.29710492929271e-14	-0.265705	0.428	0.637	3.15624542444796e-10
Ung	1.30246156161543e-14	1.61696	0.198	0.09	3.16927971787883e-10
Chst9	1.30625114314434e-14	1.23792	0.225	0.105	3.17850090661312e-10
Junb	1.31602657058019e-14	-0.339682	0.563	0.798	3.20228745419278e-10
Abhd17c	1.369574169308e-14	-0.232439	0.445	0.636	3.33258482617715e-10
Mef2d	1.43439825363057e-14	-0.120813	0.349	0.538	3.49032127055926e-10
Ptch1	1.44111903015293e-14	-0.459313	0.306	0.486	3.50667493607112e-10
Tent4b	1.49498563076517e-14	-0.126143	0.443	0.647	3.63774853534088e-10
Rad51c	1.51042152320149e-14	2.97955	0.044	0.006	3.67530869240619e-10
Rab1a	1.53242167230022e-14	-0.126893	0.574	0.857	3.72884165520812e-10
Mast2	1.56085652154343e-14	-0.332171	0.534	0.774	3.79803217387162e-10
Trib2	1.61308051092856e-14	-1.6347	0.05	0.19	3.92510880724247e-10
Crybg3	1.65174079159584e-14	-0.252046	0.432	0.639	4.01918086819015e-10
Aig1	1.65670275005234e-14	-0.558346	0.383	0.576	4.03125480170235e-10
Rbfox2	1.69148452374929e-14	-0.23706	0.549	0.798	4.11588929163914e-10
Flrt3	1.69387818626705e-14	-0.748591	0.035	0.173	4.12171379064362e-10
Cd81	1.71897728607037e-14	-0.188075	0.58	0.806	4.18278743019502e-10
Rhbdl2	1.72943596230882e-14	-0.345522	0.252	0.425	4.20823652708606e-10
Psme4	1.73073881811394e-14	-0.179769	0.705	0.95	4.21140676611665e-10
Acox1	1.86388890406083e-14	-0.519786	0.283	0.457	4.53540087025121e-10
Hspa8	1.88073374978491e-14	0.617694	0.74	0.927	4.57638943335163e-10
Irag2	1.89929335930251e-14	-0.116369	0.314	0.543	4.62155053119079e-10
Tead1	1.98182751599729e-14	-0.230887	0.705	0.932	4.82238089467621e-10
Prr13	1.98838519129144e-14	-0.100608	0.603	0.844	4.83833768596945e-10
Atg7	2.04769479358586e-14	-0.267527	0.297	0.493	4.98265574123247e-10
Rsph3b	2.07380168432899e-14	-0.754776	0.333	0.5	5.04618163847773e-10
Dpy19l4	2.09071239294552e-14	-0.190715	0.378	0.586	5.08733046575433e-10
Bin3	2.10649367340264e-14	-0.453683	0.32	0.502	5.12573105549063e-10
Slc31a1	2.13083772327062e-14	-0.285485	0.38	0.589	5.18496743203441e-10
Cd276	2.14093599893982e-14	-0.339183	0.229	0.404	5.20953956622028e-10
Dip2b	2.19962113574658e-14	-0.142196	0.638	0.901	5.35233810961215e-10
Pld2	2.21482683380814e-14	-0.399542	0.133	0.294	5.38933813470535e-10
Cyth3	2.2756832956466e-14	-0.302914	0.308	0.508	5.53742016329687e-10
Susd4	2.28295333144733e-14	-1.13274	0.102	0.257	5.55511034141079e-10
Fancm	2.31416473350389e-14	1.31895	0.247	0.125	5.63105704603502e-10
Crlf3	2.32059518258246e-14	-0.68385	0.185	0.357	5.6467042577779e-10
Stk38	2.4107725243032e-14	-0.132419	0.79	0.97	5.86613278338698e-10
Pmp22	2.46940252033412e-14	1.19252	0.16	0.064	6.008797152729e-10
Hsp90aa1	2.48130616932182e-14	0.95107	0.676	0.859	6.03776230181077e-10
Tmem176a	2.48311423324925e-14	-0.472162	0.522	0.704	6.04216186376539e-10
Rpl28	2.49361142790332e-14	0.332106	0.819	0.956	6.06770468751715e-10
Golm2	2.49890039645299e-14	1.17226	0.281	0.146	6.08057433468906e-10
Tmem164	2.55162868837481e-14	-0.209941	0.665	0.916	6.20887808742241e-10
Rnf214	2.56817862919502e-14	-0.107124	0.343	0.529	6.24914905842024e-10
Togaram1	2.60117523527002e-14	-0.160572	0.43	0.631	6.32943969998253e-10
Blcap	2.61455271886251e-14	-0.246697	0.266	0.454	6.36199113080816e-10
Usp38	2.67640905513038e-14	-0.483806	0.337	0.522	6.51250615384876e-10
Spast	2.74826124732636e-14	-0.301636	0.472	0.679	6.68734409311923e-10
Cinp	2.77435907578585e-14	1.34286	0.27	0.142	6.75084793910971e-10
Adgrg6	2.85508549671304e-14	-0.271988	0.301	0.488	6.94727953915184e-10
Zfp992	2.87008928393734e-14	-0.372709	0.337	0.524	6.98378825460472e-10
Ssbp3	3.07271367575293e-14	-0.140028	0.709	0.945	7.47683418720961e-10
Macf1	3.13197870826676e-14	-0.165088	0.761	0.968	7.62104379082551e-10
Tcp11l2	3.18504986058212e-14	-0.72644	0.104	0.266	7.75018182575447e-10
Zkscan3	3.18532746551099e-14	0.213843	0.501	0.701	7.7508573218279e-10
Gm53660	3.29134036270693e-14	4.01115	0.017	0	8.00881850457477e-10
Adam9	3.29171117381291e-14	-0.238515	0.374	0.579	8.00972079923895e-10
Gm52981	3.35712664165391e-14	0.141233	0.497	0.738	8.16889625713646e-10
Xrcc4	3.38176398562235e-14	-0.228327	0.416	0.627	8.22884630621488e-10
Dapk1	3.47664932702197e-14	-0.504274	0.337	0.536	8.45973080744255e-10
Cnppd1	3.51555915252019e-14	-0.35871	0.185	0.356	8.55441008582739e-10
B3gnt2	3.52855601399337e-14	-0.277257	0.414	0.626	8.58603534885008e-10
Lipe	3.56203818322945e-14	-0.293314	0.266	0.445	8.66750751125223e-10
Prdm1	3.60891074492852e-14	-1.71862	0.042	0.174	8.78156251563458e-10
Ube2l6	3.78003377740321e-14	-0.704157	0.156	0.321	9.19795619055523e-10
Emb	3.84970234431919e-14	0.983587	0.493	0.387	9.36748071443189e-10
Gm45397	3.8899924046065e-14	-0.53262	0.152	0.313	9.46551851812899e-10
Zfhx3	3.89099489572749e-14	-0.192165	0.846	0.988	9.46795787977371e-10
Lgmn	3.91571964937601e-14	-0.661986	0.249	0.417	9.52812062282665e-10
Eid3	3.95591731690252e-14	-1.51698	0.081	0.225	9.62593360721891e-10
2810429I04Rik	4.00105706992926e-14	1.63405	0.112	0.036	9.73577216825887e-10
Reep3	4.26527896755969e-14	-0.205282	0.728	0.939	1.0378703311763e-09
Sft2d1	4.26592245523068e-14	-0.257697	0.391	0.591	1.03802691103128e-09
Gvin2	4.27960115174546e-14	-0.110648	0.154	0.328	1.04135534825422e-09
Slc44a2	4.51849054614691e-14	0.100663	0.385	0.589	1.09948430459393e-09
Slc17a5	4.70729864564728e-14	-0.21264	0.208	0.378	1.14542697944535e-09
Tbk1	4.79172421001505e-14	-0.242029	0.443	0.66	1.16597025202296e-09
Lemd1	4.91876607423651e-14	-1.24359	0.046	0.18	1.19688334884397e-09
Fam168a	5.10898535760545e-14	-0.144864	0.439	0.628	1.24316940706614e-09
Ldhd	5.17692534812573e-14	-0.462491	0.131	0.289	1.25970124495943e-09
Nde1	5.28988185367147e-14	1.30097	0.231	0.113	1.28718695145388e-09
Por	5.33159629964291e-14	-0.181816	0.647	0.886	1.29733732759211e-09
Apol9a	5.52410813754421e-14	-1.30484	0.116	0.27	1.34418123310863e-09
Dab2ip	5.56522168742611e-14	-0.160919	0.53	0.744	1.35418539320139e-09
Usp43	5.6973048831394e-14	-0.527102	0.366	0.547	1.38632519721431e-09
Gm47545	5.72623964105019e-14	3.01609	0.023	0.001	1.39336589185674e-09
Metrnl	6.02906232987142e-14	-1.07949	0.129	0.286	1.46705173672761e-09
Ppia	6.1672807012448e-14	0.84123	0.707	0.877	1.5006844130339e-09
Sgsm3	6.32476481508855e-14	-0.498799	0.181	0.351	1.5390050224555e-09
Cuedc1	6.41334098986944e-14	-0.197579	0.312	0.488	1.56055826306493e-09
Zyx	6.44223421138314e-14	-0.315408	0.291	0.467	1.56758885065586e-09
Atp11c	6.50228304320068e-14	-0.188805	0.343	0.536	1.58220053290202e-09
Rmnd5a	6.58602053242733e-14	-0.152287	0.543	0.778	1.60257637615554e-09
Xiap	6.85589319233652e-14	-0.152875	0.597	0.853	1.66824449049124e-09
Tyk2	6.95415274502993e-14	-0.150651	0.175	0.339	1.69215398744813e-09
Gm13684	7.05076768264343e-14	-1.21875	0.042	0.172	1.71566330021763e-09
Pfkfb3	7.05285097850272e-14	-0.318332	0.36	0.574	1.71617022859907e-09
Golga2	7.31290611743716e-14	0.181915	0.351	0.558	1.77944944555599e-09
Lncppara	7.42968824915327e-14	-0.227235	0.484	0.715	1.80786604166647e-09
Rpl32	7.4452372341221e-14	0.424502	0.784	0.946	1.81164957617893e-09
Bcl10	7.90251386178412e-14	0.121517	0.335	0.52	1.92291869798793e-09
Rps27a	7.98341462341933e-14	0.463773	0.78	0.922	1.94260428031663e-09
Fbxo42	8.21912559269369e-14	-0.13665	0.358	0.546	1.99995983047015e-09
Tbc1d31	8.35176504278532e-14	1.33594	0.179	0.077	2.03223498786095e-09
Usp53	8.47763365386264e-14	-0.256565	0.428	0.637	2.06286259699440e-09
Aaas	8.75167266971974e-14	1.34782	0.231	0.113	2.1295445107229e-09
Nmt2	8.79374097206291e-14	-0.225163	0.407	0.609	2.13978099073207e-09
Wdr62	8.83852773678692e-14	2.31356	0.05	0.009	2.15067895419236e-09
Fam91a1	8.95269387277673e-14	-0.130239	0.435	0.642	2.17845900006276e-09
Plekhn1	9.01707339254496e-14	-1.5616	0.054	0.188	2.19412446860796e-09
ENSMUSG00000121307	9.11057079164286e-14	-0.36951	0.349	0.532	2.21687519073046e-09
Airn	9.47592791592621e-14	-0.164622	0.62	0.833	2.30577753978232e-09
Rplp2	9.4872749853147e-14	0.459981	0.773	0.942	2.30853862217663e-09
Tm2d1	9.58388054552837e-14	-0.391199	0.318	0.492	2.33204565314342e-09
H2ac13	9.79968842996034e-14	2.99065	0.058	0.012	2.38455818566225e-09
Platr25	1.02932050803835e-13	1.13541	0.187	0.081	2.50464559220972e-09
Stxbp2	1.04240566781695e-13	-0.333475	0.279	0.443	2.53648571149898e-09
Kansl1	1.06286040223384e-13	-0.141576	0.74	0.96	2.58625821675561e-09
[truncated: 10,378 more rows]

## Sheet: Estrus_cluster.0.2.3.10.14.24
	p_val	avg_log2FC	pct.1	pct.2	p_val_adj
Nkain3	0	-6.92408	0.016	0.562	0
Tgfbi	0	-6.875	0.016	0.559	0
Dnah14	0	-6.02467	0.037	0.575	0
Mme	0	-7.8083	0.013	0.534	0
Lrp2	0	-9.09483	0.005	0.519	0
Ckb	0	-5.46512	0.034	0.496	0
Ltf	0	2.02725	0.991	0.722	0
Plac8	3.12238655130457e-306	2.12002	0.981	0.56	7.59770319528941e-302
C3	1.10935469628947e-305	1.90329	0.992	0.826	2.69939278248117e-301
Cfb	2.63926826163047e-305	2.00759	0.975	0.623	6.42213146102543e-301
Muc4	1.08436232264912e-298	1.69127	0.998	0.86	2.6385788397021e-294
Pla2g7	1.29187891858496e-295	-3.84083	0.127	0.641	3.14352897259279e-291
Rmst	4.06153791518417e-292	-4.56751	0.13	0.639	9.88294020901764e-288
Ctsl	1.67190135238599e-290	2.09041	0.979	0.755	4.06823756076083e-286
Prap1	2.55248003755482e-289	2.0596	0.989	0.774	6.21094967538215e-285
Lcn2	1.38675528828362e-284	1.85867	0.988	0.929	3.37439164298053e-280
Clca1	4.34660023981901e-284	1.92661	0.976	0.701	1.05765823635516e-279
Qsox1	5.95003067558227e-277	1.92545	0.946	0.315	1.44782096428943e-272
Ncoa7	8.05502383645901e-277	1.56249	0.991	0.833	1.96002895012557e-272
Pigr	1.61448152835106e-275	1.82551	0.968	0.535	3.92851790293664e-271
Chst9	9.85580414607395e-263	-4.68533	0.028	0.425	2.39821282286418e-258
Egln3	4.46959923890563e-262	1.74355	0.965	0.532	1.08758758280291e-257
Arg1	2.21810535989377e-260	2.1643	0.931	0.286	5.39731577222951e-256
Fcgbp	4.60773870619719e-258	1.69431	0.958	0.707	1.12120105937896e-253
Fndc5	2.75997400612697e-255	-4.13377	0.061	0.489	6.71584474910875e-251
Trpv6	1.0068419001587e-253	1.7414	0.982	0.547	2.44994839565617e-249
9530059O14Rik	5.72960412809455e-252	-5.57078	0.026	0.402	1.39418457248925e-247
Lyn	1.34987129455972e-250	1.59472	0.98	0.726	3.28464182105216e-246
Prom1	4.28925324883748e-247	1.70013	0.981	0.645	1.04370399303962e-242
Pglyrp1	1.46142631843137e-245	2.06914	0.872	0.291	3.55608866063905e-241
Gm29904	1.02890494322981e-242	-4.98646	0.019	0.371	2.50363439836109e-238
Ly6a	1.27199112587969e-242	1.84829	0.942	0.627	3.09513600660305e-238
Sez6l	1.10115633441504e-240	-6.78653	0.007	0.326	2.67944370853212e-236
9530014B07Rik	6.71597900962693e-240	-5.42832	0.012	0.341	1.63419917241252e-235
Sftpd	5.75470396086337e-236	1.63884	0.932	0.61	1.40029211479688e-231
Pvt1	1.78572121597587e-234	-3.48785	0.095	0.537	4.34519543483409e-230
Prkg1	1.62334370201518e-233	1.78896	0.946	0.457	3.95008223011353e-229
Cfap69	8.82262983153906e-233	2.14584	0.811	0.188	2.1468105169084e-228
Atxn1	4.19200024177634e-230	1.28221	0.996	0.897	1.02003941883144e-225
Dennd2a	1.42769626737557e-227	-3.89968	0.044	0.425	3.47401332740498e-223
Chn2	1.04515721317104e-225	1.55457	0.963	0.652	2.54318104680909e-221
Emb	3.17862250749254e-224	-3.10787	0.308	0.712	7.73454214748161e-220
Ptgs1	1.67557211520516e-223	-3.65137	0.052	0.441	4.07716962792871e-219
Gda	3.76986955076484e-220	1.7539	0.882	0.308	9.17322357787609e-216
Sat1	5.04633539884024e-219	1.53315	0.982	0.839	1.2279247925998e-214
Tgm2	3.06999283890009e-214	1.62703	0.963	0.601	7.47021357489559e-210
Fndc3a	9.63243522497451e-213	1.33691	0.989	0.87	2.34386046329305e-208
Slc25a48	5.70123069736939e-212	-3.42004	0.393	0.735	1.38728046559089e-207
Setbp1	2.14142770014808e-209	1.01705	0.998	0.915	5.21073602277032e-205
Gabrp	3.56022203175442e-208	1.81197	0.872	0.383	8.66308826986803e-204
Klf7	2.03630704901128e-207	1.6786	0.886	0.408	4.95494594235915e-203
Slc2a12	9.27070024020889e-206	-5.92834	0.014	0.31	2.25583948945003e-201
Hsp90ab1	8.32620829577974e-205	-1.1304	0.966	0.927	2.02601626461208e-200
Plet1	1.16610721917762e-204	1.26229	0.993	0.93	2.83748869642491e-200
Cfi	2.73987609934164e-204	1.79779	0.832	0.369	6.666940512528e-200
Gstm1	3.08189681485428e-204	-3.59718	0.092	0.494	7.49917951958492e-200
Malat1	8.86602407468548e-203	0.877209	1	0.996	2.15736963809322e-198
Ifitm1	4.1569571426651e-202	-2.94495	0.546	0.784	1.0115123815247e-197
Slc16a12	7.03640742522934e-202	-7.86515	0.002	0.26	1.71216901878106e-197
Ybx1	8.68956864392572e-201	-1.23678	0.958	0.903	2.11443273812645e-196
Trpm6	1.66171716409932e-200	1.49003	0.942	0.635	4.04345637540288e-196
Xdh	2.332053002263e-200	1.3249	0.849	0.302	5.67458457040656e-196
Pla2g2e	7.61969784187021e-200	2.11396	0.697	0.106	1.85410107586228e-195
Calb1	3.34096928307638e-199	-4.1153	0.089	0.478	8.12958055650976e-195
Il17rb	1.09841747462784e-198	-3.75583	0.181	0.594	2.67277924101191e-194
Capn5	7.10114367243777e-198	1.5475	0.903	0.536	1.72792128981428e-193
Inhbb	6.37985915241329e-197	2.2684	0.702	0.119	1.55241112755672e-192
Rps8	5.31511782023535e-195	-1.1184	0.962	0.914	1.29332761919787e-190
Serpina1e	2.10807620251611e-194	1.64728	0.913	0.644	5.12958182358245e-190
Ahnak	2.96804763547487e-194	1.06962	0.991	0.905	7.22215031140101e-190
Iqgap2	2.12793778865841e-193	1.12914	0.986	0.87	5.1779110211425e-189
Nhs	2.18016064609753e-193	-4.37131	0.019	0.314	5.30498490014912e-189
Slc8a1	2.18422145392162e-192	-3.1038	0.085	0.477	5.31486606382749e-188
Ero1a	2.1903645183863e-192	1.74129	0.875	0.478	5.32981398258939e-188
Slit2	1.02200735410734e-191	1.71347	0.858	0.294	2.48685049474939e-187
Sprr2f	2.50576082875063e-191	1.71614	0.969	0.783	6.0972678245989e-187
Rpsa	1.12541222548187e-190	-1.20858	0.936	0.887	2.73846556826502e-186
Cyb5r3	1.55138690008253e-190	-2.95688	0.526	0.754	3.77498974397082e-186
Birc3	6.93148097924784e-189	1.90001	0.793	0.306	1.68663726668038e-184
Ncl	7.51901998347671e-189	-1.31657	0.916	0.874	1.82960313257939e-184
Plekhg1	1.83892314524564e-188	1.21921	0.968	0.697	4.47465168932622e-184
Sox5	8.71930675471961e-188	-3.26958	0.136	0.544	2.12166891262592e-183
Rps10	9.78528941642729e-188	-1.17022	0.907	0.895	2.38105447369925e-183
Tmprss11d	2.97883805945693e-187	1.56592	0.79	0.23	7.24840665007656e-183
Mxd1	5.8721353633414e-187	2.02992	0.802	0.279	1.42886669796186e-182
Rplp1	1.69124049052829e-186	-1.14979	0.938	0.902	4.11529548560249e-182
Prr16	1.04014265912874e-185	-4.43085	0.026	0.326	2.53097913245795e-181
Ceacam1	1.22806519411667e-185	1.39085	0.964	0.771	2.9882510368441e-181
Atp2b2	2.47744825183308e-185	-2.52016	0.311	0.713	6.02837483118544e-181
Cacna2d3	5.68321038845066e-185	1.42237	0.929	0.55	1.3828955838217e-180
Eef1a1	3.47945606212348e-184	-0.929838	0.98	0.939	8.46656043596505e-180
Rpl13	1.30299217590129e-183	-0.921258	0.962	0.922	3.1705708616206e-179
Rps26	3.21961106489388e-183	-1.0921	0.935	0.884	7.83427960420628e-179
Rps3a1	5.00300464144172e-183	-1.31827	0.905	0.876	1.21738111940201e-178
Myo1d	9.20534459490069e-183	1.07689	0.994	0.908	2.23993650027719e-178
Anpep	1.89931584041066e-181	-2.01496	0.683	0.802	4.62160523447127e-177
Npm1	3.94251708299687e-180	-1.25413	0.886	0.872	9.59332681805627e-176
Cdkl1	7.94139176702268e-180	-2.18842	0.427	0.757	1.93237885866963e-175
Nipsnap1	3.18104936816534e-179	-2.89785	0.19	0.583	7.74044742755671e-175
Thrsp	4.03321842849726e-179	-3.40651	0.143	0.534	9.81403040206238e-175
Rnf186	1.00213814268801e-178	1.92468	0.715	0.171	2.43850274260274e-174
Samd9l	2.4726566698512e-178	1.02953	0.965	0.702	6.01671547474893e-174
Steap2	1.09894054911176e-177	1.33959	0.822	0.395	2.67405203815364e-173
Rps21	1.60733710038039e-177	-1.19128	0.886	0.856	3.9111333663556e-173
Olfm1	1.43682362910559e-176	2.10797	0.813	0.358	3.49622293670262e-172
Dnaja1	4.56432350750171e-176	-1.60328	0.84	0.837	1.11063683908039e-171
Gstm2	9.54192117462623e-176	-2.90831	0.16	0.557	2.3218356794218e-171
Cd47	2.34086521465846e-175	1.04696	0.947	0.763	5.69602732682844e-171
Itga2	2.97593037368376e-175	1.79703	0.868	0.41	7.24133137828469e-171
Naip1	3.68392981567853e-175	1.31578	0.809	0.327	8.96410642049057e-171
Rpl23	1.3241677980711e-174	-0.974782	0.947	0.9	3.22209750304642e-170
Itgam	1.74779624354873e-174	2.02019	0.71	0.154	4.25291259942712e-170
Rpl21	2.45799094760066e-174	-1.0423	0.929	0.872	5.98102937279668e-170
Muc1	1.11548801606711e-173	1.11931	0.899	0.597	2.71431698949609e-169
Spp1	2.16122665347557e-173	2.26152	0.764	0.236	5.2589128159021e-169
Trim35	9.31344043734763e-173	-4.47517	0.015	0.277	2.2662394616198e-168
Rpl17	9.38867947264011e-172	-1.03898	0.937	0.891	2.28454737607752e-167
Raph1	3.66708222515573e-171	1.33008	0.914	0.614	8.92311117847145e-167
Rbms3	4.45106975890483e-171	-2.41589	0.261	0.671	1.08307880443431e-166
Serpinh1	6.56744621332385e-171	-3.27812	0.091	0.447	1.59805668708809e-166
Rpl32	1.07427456824493e-170	-0.982248	0.94	0.891	2.61403230691038e-166
Rps4x	2.14493711614812e-170	-1.19358	0.911	0.869	5.21927548472322e-166
Slc40a1	2.64798211666104e-170	1.09844	0.971	0.824	6.44333488447131e-166
Rps18	4.97605443660895e-170	-1.16119	0.897	0.862	1.21082332606005e-165
Rpl3	8.94746231821685e-170	-1.35146	0.864	0.846	2.17718600589171e-165
Pcolce2	1.28538198647391e-169	-2.7351	0.134	0.52	3.12771998768696e-165
Rps20	2.06203148063788e-169	-0.922775	0.946	0.903	5.01754120183616e-165
Eps8	2.58122648044541e-169	1.33477	0.97	0.799	6.28089839486781e-165
Rps7	3.87553304095411e-169	-1.06477	0.925	0.879	9.43033454855363e-165
Ptprm	1.14310914253843e-168	1.29545	0.937	0.61	2.78152747653876e-164
Lama3	3.45787148456904e-168	1.48693	0.966	0.801	8.41403868340184e-164
Ahcyl2	4.04654922696592e-168	0.998997	0.987	0.913	9.84646823397616e-164
Cd55	8.13536440365194e-168	1.13631	0.963	0.839	1.97957822034063e-163
Rpl14	9.75357556471834e-168	-1.03327	0.928	0.876	2.37333754216291e-163
Pkhd1l1	4.66258866593721e-166	-4.07858	0.017	0.277	1.1345477000825e-161
Rps9	4.83138876686368e-166	-1.1477	0.888	0.87	1.17562182864094e-161
Rps16	4.87896803916716e-166	-0.969792	0.937	0.89	1.18719929297054e-161
Rps27a	5.88871652892567e-166	-1.03667	0.913	0.885	1.43290139298348e-161
Rpl11	8.97862215270311e-166	-1.0272	0.926	0.874	2.18476812841725e-161
Rpl12	1.53411806857798e-165	-1.30782	0.866	0.842	3.7329694962708e-161
Mndal	3.85036668389455e-165	1.80416	0.697	0.159	9.36909725192061e-161
Slc16a14	6.05897621189207e-165	1.51002	0.711	0.18	1.4743306816397e-160
Rpl39	8.96516740843889e-165	-1.24174	0.844	0.84	2.18149418549544e-160
Flnb	5.09964729389269e-164	1.20152	0.976	0.82	1.24089717602291e-159
Snx7	8.33055677197215e-164	1.34445	0.88	0.538	2.02707437932398e-159
Casp4	3.68371307584913e-163	1.60377	0.793	0.333	8.96357902746368e-159
Ptn	3.83681522994723e-163	-3.54075	0.144	0.512	9.3361224990306e-159
Taok3	9.57270047901052e-163	1.13062	0.934	0.697	2.32932520755763e-158
Met	1.04123260837692e-162	1.16844	0.944	0.69	2.53363130596356e-158
Emid1	3.49830489194321e-162	-6.14607	0.005	0.224	8.51242529356542e-158
2700054A10Rik	3.49779502638965e-161	-2.77831	0.089	0.443	8.51118463771393e-157
Bambi	8.33335421591997e-161	-3.84658	0.05	0.353	2.02775508135981e-156
Slc26a9	8.98458429534154e-161	1.78115	0.679	0.172	2.18621889658546e-156
Rps5	1.5637848814832e-160	-1.04138	0.906	0.865	3.80515775211308e-156
Bche	4.98567824542648e-160	-4.57592	0.021	0.279	1.21316508745963e-155
Rpl10a	6.34024793839675e-160	-1.11761	0.9	0.872	1.54277253085008e-155
Slc5a8	7.57611095283857e-160	2.52668	0.595	0.075	1.84349507815421e-155
Parp14	3.04954046612322e-159	1.27909	0.907	0.614	7.42044681621762e-155
St14	4.63459057347891e-159	0.950948	0.973	0.806	1.12773492424462e-154
Gcnt3	5.04165748676386e-159	-2.5759	0.155	0.533	1.22678651625425e-154
Rpl6	8.05527125176962e-159	-0.883161	0.95	0.891	1.9600891536931e-154
Nupr1	9.06144724570632e-159	1.50551	0.719	0.195	2.20492195829772e-154
Rps2	4.77823933622859e-158	-1.16339	0.917	0.877	1.1626889776845e-153
Akap13	9.94244619040735e-158	0.748072	0.997	0.952	2.41929543151182e-153
Gm20559	2.26650193074024e-157	1.25811	0.852	0.462	5.51507914807021e-153
Mmp7	2.61713737690724e-157	2.03987	0.633	0.12	6.36828037922839e-153
Mcub	5.49761545764053e-157	1.94653	0.668	0.178	1.33773476930767e-152
Dut	1.00484309490874e-156	-3.51956	0.102	0.445	2.44508470284145e-152
Bend4	1.16201914667961e-156	1.761	0.784	0.362	2.8275411896155e-152
Celf2	2.28252399223488e-156	0.936064	0.989	0.926	5.55406563030514e-152
Etv5	3.98311429356167e-156	-3.08691	0.061	0.378	9.69211201052362e-152
0610040J01Rik	1.28190853562255e-155	1.0197	0.969	0.782	3.11926803973036e-151
Greb1l	1.91014567643193e-155	-3.51156	0.076	0.403	4.64795747446182e-151
Itgav	2.13806602739778e-154	1.72477	0.954	0.758	5.20255606446702e-150
Slc26a4	5.28150991741642e-154	2.03977	0.626	0.104	1.28514980820494e-149
Set	5.14398739216139e-153	-1.13103	0.891	0.853	1.25168645213463e-148
Rps13	6.51308542630913e-153	-1.18554	0.856	0.844	1.5848290767838e-148
Shank2	8.69378387951686e-152	-2.21589	0.197	0.585	2.11545843140284e-147
Osbpl3	9.34049134000427e-152	1.05276	0.984	0.841	2.27282175776324e-147
Vmp1	3.65781756804181e-151	0.856165	0.974	0.8	8.90056748831614e-147
Flt1	4.02451116685462e-151	1.79262	0.643	0.144	9.79284302230735e-147
Ndufc2	4.46111838881285e-151	-1.86602	0.642	0.777	1.08552393754983e-146
Alpl	5.21250750407008e-151	1.50335	0.789	0.329	1.26835945096537e-146
Golm1	8.19723465785171e-151	1.17294	0.86	0.352	1.99463310929506e-146
Rpl15	1.16006555802528e-150	-1.13869	0.881	0.85	2.82278752234292e-146
Cxcl16	1.34581497349641e-150	1.97595	0.667	0.2	3.27477157500881e-146
Hmgb1	1.86277058923395e-150	-1.0113	0.933	0.894	4.53267967478297e-146
Acer3	2.02415383960796e-150	0.938792	0.978	0.815	4.92537353791804e-146
Slc5a1	2.2417564912516e-150	1.97651	0.65	0.17	5.45486607016252e-146
Zdhhc14	3.66393974230322e-150	1.764	0.747	0.3	8.91546457494643e-146
Rps15a	3.95952125035261e-150	-1.12658	0.897	0.858	9.63470305848302e-146
Ccser1	4.431872586298e-150	1.31641	0.833	0.392	1.07840755642389e-145
Rplp2	5.74379267094318e-150	-0.938186	0.936	0.882	1.3976370706206e-145
Dbndd2	7.52706928961652e-150	-2.56636	0.217	0.579	1.83156177024239e-145
Id2	8.38878794043325e-150	-2.4391	0.417	0.71	2.04124376954562e-145
Hspd1	9.15568299599699e-149	-1.58894	0.713	0.804	2.22785234341595e-144
Hnrnpab	2.77444231501882e-148	-0.98765	0.91	0.875	6.75105048513529e-144
Ifi44	3.49913691068629e-148	1.39351	0.745	0.27	8.51444984477295e-144
Arnt2	5.38745192522936e-148	-2.48512	0.139	0.508	1.31092867696606e-143
Ptpn13	7.03011292406172e-148	1.01322	0.982	0.852	1.71063737781194e-143
Mctp2	3.19881175458661e-147	1.50816	0.716	0.247	7.78366864243559e-143
Rpl41	4.52744255793213e-147	-0.88678	0.935	0.894	1.10166259762162e-142
Ifngr2	5.46731231512293e-147	0.989612	0.909	0.703	1.33036110563886e-142
Chp1	6.91804856179143e-147	1.36911	0.835	0.492	1.68336875654071e-142
Acyp2	7.57958119834191e-147	-2.6511	0.091	0.427	1.84433949299254e-142
Rpl30	3.46742739774678e-146	-1.05481	0.877	0.858	8.43729108693725e-142
St3gal1	3.89951889535861e-146	1.5437	0.814	0.445	9.48869932807611e-142
Slc27a3	7.54471542077141e-146	-2.75039	0.101	0.438	1.83585560333631e-141
Nfkbiz	7.10449965924552e-145	1.21256	0.911	0.622	1.72873790208421e-140
Il36a	1.05565613168879e-144	1.59359	0.61	0.116	2.56872806523834e-140
Cndp2	2.21758536641454e-144	-1.53276	0.768	0.811	5.39605047209651e-140
Sult1d1	4.43110467321747e-144	-2.76227	0.183	0.542	1.07822070013401e-139
Golm2	8.06054308322236e-144	-2.97324	0.088	0.413	1.9613719484405e-139
Tnfsf10	3.31420974054102e-143	1.33728	0.815	0.441	8.06446656165847e-139
Hmgn1	4.10763578393602e-143	-1.73843	0.581	0.764	9.99511015305151e-139
Fat3	8.19455166357866e-143	-4.35987	0.023	0.264	1.9939802562986e-138
Rapgef5	1.00619582367547e-142	1.19772	0.866	0.536	2.44837629774952e-138
Lamc2	2.79611403951131e-142	1.19544	0.928	0.658	6.80378429234288e-138
Rps14	3.12768753226302e-142	-0.769355	0.959	0.924	7.61060207225562e-138
Rpl5	4.16718114507545e-142	-0.917299	0.926	0.878	1.01400018803121e-137
Ccnd1	5.73689687724449e-142	-2.23829	0.42	0.707	1.3959591171399e-137
Rpl7a	1.46338946807277e-141	-1.07456	0.871	0.837	3.56086559266146e-137
Rpl13a	7.65257173800224e-141	-0.791752	0.953	0.89	1.86210028100808e-136
Ifi203	1.56723196196879e-140	2.13466	0.603	0.119	3.81354553305866e-136
Rps12	2.32917471158491e-140	-0.743374	0.958	0.912	5.66758082569955e-136
Hspe1	4.49494924912472e-140	-1.72754	0.591	0.762	1.09375600078952e-135
Fam3d	1.76978731949518e-139	1.52267	0.752	0.319	4.30642348452763e-135
Zc3h12a	1.86309847443309e-139	1.42997	0.642	0.177	4.53347751783803e-135
Arhgef38	1.89496611735381e-139	0.926937	0.943	0.721	4.61102105335703e-135
Slc4a4	7.26272056044982e-139	1.96968	0.657	0.196	1.76723779397425e-134
Rpl36a	1.03277399534972e-138	-1.23134	0.788	0.813	2.51304896288448e-134
Rps24	2.20941298813508e-138	-0.724691	0.963	0.923	5.37616462402908e-134
Ifitm3	2.54167452442854e-138	-1.3479	0.816	0.834	6.18465662029198e-134
Il1a	2.64841469537841e-138	2.97642	0.531	0.068	6.4443874782643e-134
Pbx1	3.4287148582113e-138	0.782127	0.996	0.938	8.34309186448555e-134
Rpl34	6.4703320030547e-138	-0.933842	0.89	0.867	1.5744258863033e-133
Dock11	1.20787051220916e-137	1.04607	0.909	0.645	2.93911131735855e-133
Paics	1.21975313278669e-137	-1.92923	0.438	0.717	2.96802529800985e-133
Serbp1	2.48312668991492e-137	-0.884274	0.927	0.865	6.04219217456999e-133
Rpl35a	5.19200007326651e-137	-0.911921	0.905	0.862	1.26336937782794e-132
Btg1	8.30186348653559e-137	0.938652	0.933	0.732	2.0200924421787e-132
Rpl8	1.29246037968133e-136	-1.09276	0.88	0.84	3.14494384187858e-132
Abca4	1.99694251060888e-136	-2.77315	0.117	0.447	4.85916021106459e-132
Tcf7l2	2.11165839079769e-136	0.998464	0.943	0.697	5.13829836232803e-132
Ppp2r2b	3.90561945602847e-136	-2.15735	0.368	0.71	9.50354382235408e-132
Ppia	4.96306279570767e-136	-1.21711	0.862	0.848	1.20766207007955e-131
Hsd17b2	1.13292613436407e-135	1.99635	0.564	0.096	2.75674916274808e-131
Rpl36	1.30917144329645e-135	-0.870136	0.928	0.881	3.18560687297324e-131
Mab21l3	1.47311995231464e-135	1.51633	0.893	0.645	3.58454277996721e-131
Adgrg7	7.41475771802861e-135	1.5841	0.77	0.339	1.8042329955279e-130
Lrg1	7.56218300393288e-135	2.14275	0.544	0.079	1.84010599034699e-130
Syne2	8.74764732764342e-135	0.668681	0.994	0.924	2.12856502423547e-130
Hdc	1.20527057923648e-134	-2.98251	0.151	0.486	2.93278490045612e-130
Rp1	2.8889456527664e-134	-4.65508	0.018	0.238	7.02967145687647e-130
Rps25	3.95496819774611e-134	-1.03889	0.85	0.835	9.6236241155756e-130
Abca1	3.78920923577892e-133	1.22687	0.838	0.528	9.22028283342083e-129
Rps17	4.10386545794719e-133	-1.00062	0.88	0.842	9.98593581882289e-129
Cdcp1	8.6038855132446e-133	0.920745	0.956	0.792	2.09358346193781e-128
Micu1	3.85643529099075e-132	1.07748	0.867	0.554	9.38386399356779e-128
Pim1	4.267323597963e-132	1.41153	0.816	0.403	1.03836785109234e-127
Kcnd3	7.26724314715499e-132	-5.66464	0.005	0.19	1.76833827499722e-127
Rpl4	7.58348701726912e-132	-0.818345	0.93	0.865	1.8452898959121e-127
Rpl22	1.31524581406433e-131	-0.844267	0.908	0.871	3.20038763936273e-127
Nfkb1	4.49207176052639e-131	1.22327	0.904	0.667	1.09305582148889e-126
Ptma	7.91817658188942e-131	-0.743691	0.981	0.957	1.92672990767115e-126
Fut9	1.3889875150081e-130	0.856772	0.993	0.936	3.3798233202692e-126
Rpl27	2.81218802476065e-130	-0.788051	0.925	0.883	6.84289712065008e-126
Prkar2b	3.22059519668391e-130	2.01811	0.546	0.096	7.83667429209096e-126
Stox2	7.30707032322127e-130	-2.42591	0.118	0.451	1.77802942174943e-125
Ccnd2	9.65291270397543e-130	-4.10825	0.031	0.268	2.34884324825834e-125
Itpripl2	1.72112667632698e-129	1.70799	0.526	0.078	4.18801754150645e-125
Trim25	1.94828293785404e-129	1.25413	0.906	0.683	4.74075687268023e-125
Eef1b2	2.6094501562478e-129	-0.862905	0.905	0.861	6.34957506519778e-125
Ptprk	2.77808053254454e-129	0.693626	0.986	0.871	6.75990335984063e-125
Adam10	3.09922516255979e-129	0.82662	0.971	0.851	7.54134458805673e-125
Rpl26	4.81595006317835e-129	-0.774819	0.935	0.875	1.17186512887319e-124
Sbspon	5.66735602524622e-129	-3.78361	0.04	0.291	1.37903774162316e-124
Tmem45b	7.61899668461487e-129	1.01397	0.948	0.752	1.85393046326734e-124
Neat1	7.74018365950709e-129	1.1357	0.969	0.8	1.88341888986786e-124
Fnip1	1.04354237504434e-128	1.12974	0.849	0.518	2.5392516611954e-124
Ly6e	1.35381089570742e-128	0.932948	0.933	0.776	3.29422805252486e-124
Adra2c	1.51045453459665e-128	-6.9997	0.001	0.166	3.67538901903402e-124
Zmynd8	1.94155463579242e-128	0.767738	0.968	0.839	4.7243848952737e-124
Mtss1	2.17013924650527e-128	1.27092	0.782	0.391	5.28059982852127e-124
Ptgr1	2.28752583632833e-128	-3.19123	0.061	0.338	5.56623661753774e-124
Mid2	2.60141827559297e-128	1.35006	0.766	0.371	6.33003109000038e-124
Rps11	5.38927381313654e-128	-0.698308	0.952	0.909	1.31137199695051e-123
Wfdc2	5.86956737766861e-128	-0.978128	0.945	0.871	1.4282418300081e-123
Hivep2	6.09995128065575e-128	0.948156	0.978	0.836	1.48430114512196e-123
Stard13	6.53060040430585e-128	-3.20617	0.094	0.398	1.58909099637974e-123
Muc20	1.50055043591826e-127	1.18536	0.745	0.362	3.65128937571991e-123
Rps27	2.97226448650475e-127	-0.956725	0.878	0.846	7.23241117501202e-123
Rpl27a	5.68400625200681e-127	-0.798558	0.936	0.878	1.38308924130082e-122
Eeig2	5.9320721062374e-127	1.91859	0.562	0.115	1.44345110561075e-122
Rpl18	6.00087185126454e-127	-0.88095	0.904	0.873	1.4601921475682e-122
Gm35019	6.90696867318378e-127	1.07465	0.882	0.614	1.68067268724581e-122
Slc7a11	1.59470794750764e-126	-2.49202	0.265	0.601	3.88040284867033e-122
Fkbp5	1.94244328643183e-126	-2.89459	0.124	0.439	4.72654724887457e-122
Hspa8	2.29031897891983e-126	-0.981271	0.92	0.863	5.57303317140562e-122
Cpm	2.57140053633936e-126	1.44628	0.825	0.434	6.25698892507456e-122
Mal2	7.02625979358866e-126	0.974731	0.943	0.792	1.70969979557393e-121
Rpl7	1.38889956779656e-125	-0.77547	0.939	0.893	3.37960931831937e-121
Hgfac	2.16293803724546e-125	1.60273	0.611	0.166	5.26307712602938e-121
Cox7a2l	2.28182303190276e-125	-1.62685	0.689	0.767	5.55235998352899e-121
Cux1	3.21335631454809e-125	0.72441	0.988	0.882	7.81905992018986e-121
Impdh2	3.23696744686832e-125	-1.87133	0.393	0.681	7.87651288846469e-121
Irf7	4.15894034326318e-125	1.22577	0.686	0.236	1.01199495372623e-120
Scx	4.25472090886538e-125	-2.94254	0.078	0.364	1.03530123875421e-120
Arhgef3	1.69219188058672e-124	1.31246	0.876	0.608	4.11761050303167e-120
Aldh7a1	2.19701560713562e-124	-2.18299	0.226	0.568	5.34599807684311e-120
Astn2	3.15923780845609e-124	-2.41913	0.236	0.583	7.68737335931619e-120
Tmprss4	4.16908583599482e-124	0.983962	0.811	0.493	1.01446365647262e-119
Tnip3	5.51556798965003e-124	2.87187	0.494	0.059	1.34210315892154e-119
Adgrl2	5.53773996085676e-124	1.13455	0.886	0.585	1.34749826467528e-119
Rps6	8.59088542328127e-124	-0.929364	0.882	0.84	2.09042015004703e-119
Rps23	1.83463119493314e-123	-0.812898	0.922	0.875	4.46420808663082e-119
Sox17	3.15055932861387e-123	-2.35034	0.528	0.7	7.66625601431612e-119
Oasl2	8.57917783321325e-123	1.31532	0.756	0.341	2.08757134215578e-118
Tenm4	1.75617436783286e-122	1.2499	0.892	0.667	4.27329908924771e-118
Hk1	2.70686689261272e-122	-2.00707	0.247	0.589	6.58661920979452e-118
Mgat4a	2.98814455223765e-122	1.23021	0.805	0.423	7.27105213895987e-118
Kcnc2	3.15397318035543e-122	1.15703	0.891	0.551	7.67456293975887e-118
Spsb4	4.35784687900597e-122	-3.33054	0.028	0.255	1.06039488106852e-117
C430049B03Rik	5.03955205249567e-122	1.99196	0.602	0.166	1.22627420093377e-117
Samd12	6.63765637598399e-122	0.973696	0.967	0.835	1.61514092596819e-117
Trip12	1.05701386020413e-121	0.66879	0.988	0.885	2.5720318260347e-117
Rps3	1.09852393385262e-121	-0.859289	0.913	0.874	2.67303828824357e-117
Itgb8	1.45150368054131e-121	1.44455	0.622	0.188	3.53194390586117e-117
Ppp1r36	2.39196713273479e-121	-3.47302	0.032	0.262	5.82037362408356e-117
Slc13a5	2.50985948213135e-121	-7.0777	0.001	0.157	6.10724107787021e-117
Rpl28	4.90113653322038e-121	-0.644264	0.952	0.905	1.19259355262851e-116
Rpl24	5.56957100342916e-121	-0.768666	0.925	0.869	1.35524371226442e-116
Ddx60	9.06967196867869e-121	1.85806	0.647	0.222	2.20692328013858e-116
Ptges3	9.29013835502403e-121	-1.1236	0.822	0.825	2.260569365928e-116
Oas2	9.50079721215437e-121	1.30166	0.759	0.334	2.31182898563352e-116
Flna	1.31627807166041e-120	-2.05	0.224	0.563	3.20289943177128e-116
Hspb1	1.61665971073711e-120	-2.09239	0.473	0.705	3.93381807413662e-116
Il13ra1	1.79001908672939e-120	1.05578	0.831	0.501	4.35565344373863e-116
Cks1b	3.76435578583156e-120	-3.03602	0.106	0.4	9.15980693366394e-116
Plpp3	4.3981555726959e-120	-3.38392	0.119	0.421	1.07020319550409e-115
Ifi202b	5.1869050311867e-120	1.7312	0.52	0.088	1.26212960123866e-115
Prxl2a	7.82357356491166e-120	0.808946	0.991	0.932	1.90371015554995e-115
Hsp90aa1	8.34322702232292e-120	-1.19646	0.843	0.828	2.03015743134184e-115
BC048679	1.55997920304635e-119	-2.12867	0.142	0.47	3.79589739477268e-115
Fosl2	7.65722273687489e-119	0.927159	0.858	0.495	1.86323200856377e-114
Rack1	1.36489557680454e-118	-0.892929	0.914	0.857	3.32120040703848e-114
Mycn	1.73388219058035e-118	1.20842	0.722	0.321	4.21905553433916e-114
Ifitm2	1.89069208021168e-118	-1.37064	0.703	0.777	4.60062103877907e-114
Tnfaip3	1.97346906818291e-118	2.69487	0.505	0.085	4.80204228360948e-114
Ptprj	2.15010042113113e-118	0.925044	0.981	0.885	5.23183935473837e-114
Hpcal1	3.13550237658774e-118	1.15871	0.85	0.573	7.62961793295094e-114
Rps15	6.24689711998479e-118	-0.670335	0.945	0.89	1.5200574762059e-113
Ddah2	6.81060817925654e-118	-2.9088	0.045	0.29	1.6572252882585e-113
Trmt112	1.27285123552786e-117	-1.71051	0.445	0.698	3.09722891140994e-113
Gjb3	1.37376956485414e-117	-2.76052	0.076	0.351	3.34279348215958e-113
Slc39a14	2.75392322472637e-117	-2.18902	0.309	0.618	6.70112138272668e-113
Pard3b	2.87439726292877e-117	-1.85557	0.427	0.704	6.99427085988458e-113
Cfh	3.80330820096849e-117	0.78193	0.965	0.86	9.25458984541662e-113
Ifitm10	4.33584978351142e-117	-3.19874	0.037	0.271	1.05504232782183e-112
Polr2h	5.12959481518369e-117	-1.98433	0.283	0.602	1.24818430637865e-112
Rcl1	2.33407848872723e-116	-1.91222	0.266	0.598	5.67951318661998e-112
Gsto1	3.66771159448903e-116	1.00118	0.963	0.854	8.92464262287015e-112
Lgals1	4.05169180085313e-116	-3.18526	0.03	0.251	9.85898165901592e-112
Grpel2	4.14925253864101e-116	1.19624	0.77	0.437	1.00963762022752e-111
Palld	5.89038239180495e-116	-2.20231	0.29	0.61	1.4333067473979e-111
Tns1	1.13939499414077e-115	-2.05859	0.328	0.634	2.77248983924274e-111
Zbp1	1.31825849052868e-115	1.8084	0.564	0.143	3.20771838500344e-111
Hnrnpa3	1.66065924984673e-115	-0.878726	0.943	0.884	4.04088215265204e-111
Gas5	2.08291452972952e-115	-1.50517	0.637	0.766	5.06835592519084e-111
Bhlhe40	2.12289158044679e-115	0.809659	0.944	0.757	5.16563208270118e-111
Hnrnpa2b1	2.41554068485043e-115	-0.662128	0.987	0.93	5.87773514844655e-111
Spint2	3.54925164665003e-115	0.59063	0.983	0.887	8.63639403179353e-111
Actn1	9.90003687552715e-115	-1.54647	0.658	0.769	2.40897597292202e-110
Steap1	1.24289518898043e-114	1.96645	0.56	0.159	3.02433686334608e-110
Sptlc3	1.54887356117625e-114	-7.73087	0.001	0.147	3.76887403641018e-110
Cyb5b	4.64509077598842e-114	-1.45025	0.58	0.76	1.13028993852126e-109
Tent5a	1.36897102522146e-113	1.07436	0.793	0.402	3.33111719567137e-109
AU021092	1.65914503826145e-113	-2.7727	0.061	0.318	4.0371976216016e-109
Fkbp4	1.70863777984373e-113	-1.48076	0.63	0.755	4.15762830969375e-109
Mbnl2	1.78749688089342e-113	0.724938	0.977	0.845	4.34951616027796e-109
Rpl35	1.93915261394631e-113	-0.987887	0.846	0.831	4.71854005551556e-109
Csgalnact1	1.94636428314456e-113	1.85403	0.597	0.19	4.73608821017566e-109
Trp53inp2	2.22138314421765e-113	1.59216	0.553	0.152	5.40529160482481e-109
Plekha6	2.29545131246589e-113	1.0125	0.904	0.664	5.58552167862325e-109
S100a6	2.34613256139138e-113	-1.45045	0.386	0.706	5.70884436163364e-109
Wnt11	3.66555171027244e-113	-3.67593	0.026	0.235	8.91938697660594e-109
Upk3bl	3.73561957868543e-113	1.72125	0.576	0.175	9.08988312081527e-109
Thbs1	4.91524403763362e-113	-3.46787	0.05	0.292	1.19602633167739e-108
Fnbp1	1.77145135915338e-112	0.849912	0.931	0.748	4.31047259222791e-108
Rps19	2.55563174830664e-112	-0.713806	0.931	0.873	6.21861873315456e-108
Clic5	2.9950051924175e-112	1.32156	0.546	0.124	7.28774613470949e-108
Ppp2r2c	4.40917428150433e-112	-5.38322	0.008	0.176	1.07288437791845e-107
Kdm3a	6.17420212827953e-112	0.898488	0.882	0.61	1.50236860387426e-107
Clec2d	6.26719584463813e-112	1.30673	0.661	0.264	1.5249967648758e-107
Ebf4	8.33322841086709e-112	-3.4522	0.027	0.237	2.02772446921629e-107
9330185C12Rik	1.0141263094303e-111	-4.14084	0.019	0.213	2.46767354873675e-107
Urah	1.56319164201517e-111	1.14736	0.676	0.303	3.80371422251552e-107
Peg10	1.68886904610683e-111	1.84392	0.552	0.135	4.10952504989175e-107
Wnt5a	2.07093727331104e-111	-2.0826	0.241	0.563	5.03921166714775e-107
Ndrg1	2.6730727523673e-111	1.90681	0.586	0.178	6.50438792833535e-107
Gm49890	3.22678140665224e-111	1.08651	0.889	0.616	7.8517271968069e-107
Ptgs2	3.24167930844042e-111	2.02065	0.563	0.152	7.88797826122807e-107
Pam	3.49746463133541e-111	0.79621	0.971	0.877	8.51038068742846e-107
Uox	4.24105343651871e-111	2.51181	0.492	0.085	1.0319755327081e-106
Naca	8.30156697262058e-111	-0.784979	0.918	0.852	2.02002029144777e-106
Ypel2	9.42240221949853e-111	1.32796	0.795	0.473	2.29275313207058e-106
Polk	1.06264943188186e-110	1.19847	0.686	0.292	2.58574486259813e-106
Psd3	1.66631506437378e-110	0.982428	0.866	0.585	4.05464444614072e-106
Fads2b	1.80513507026295e-110	-1.35159	0.759	0.818	4.39243516647083e-106
Smox	3.99627363906047e-110	1.08711	0.901	0.688	9.72413264592585e-106
Tuba1b	8.92833321982671e-110	-2.29244	0.333	0.619	2.17253132238043e-105
Dleu2	1.46615777430068e-109	0.979598	0.942	0.715	3.56760171220584e-105
Ap3b2	2.25573520475734e-109	-1.94745	0.164	0.489	5.48888047373604e-105
Prkca	2.68386203471237e-109	1.58713	0.647	0.251	6.53064148906561e-105
Usp6nl	4.11930029629263e-109	0.861999	0.975	0.829	1.00234934109688e-104
Nrg4	4.19919947713819e-109	-2.69772	0.037	0.259	1.02179120877204e-104
Mcm2	4.96269057985359e-109	-2.7806	0.117	0.403	1.20757149879577e-104
Cibar1	5.52167669444653e-109	-3.04107	0.039	0.264	1.34358959005967e-104
Slc15a2	6.36709310596867e-109	-2.12334	0.144	0.462	1.54930476547536e-104
Ihh	7.79019277189009e-109	-7.09785	0.001	0.144	1.89558760718402e-104
Clic4	1.06961518572703e-108	1.84268	0.786	0.448	2.60269463142957e-104
Gulo	1.2505349822385e-108	-5.64567	0.003	0.153	3.04292677228095e-104
Myof	1.6046856588036e-108	0.976575	0.922	0.704	3.9046816135668e-104
Atg9b	3.21497640919297e-108	1.85808	0.451	0.053	7.82300209648926e-104
Golgb1	3.85133838410957e-108	0.475914	0.988	0.888	9.37146169005382e-104
Ran	5.3471669016084e-108	-1.40863	0.69	0.775	1.30112612216837e-103
Ptprr	6.11377982883981e-108	1.04093	0.892	0.669	1.48766604575159e-103
Fndc3b	7.02112275575049e-108	0.833347	0.982	0.877	1.70844980015677e-103
Nav2	7.75376398382237e-108	-1.1929	0.853	0.848	1.8867233901835e-103
Oaz1	9.59585440601487e-108	-1.11599	0.778	0.807	2.3349592526156e-103
Pcdh17	1.03855111179481e-107	1.52309	0.601	0.174	2.52710642033032e-103
Slc6a6	1.15714867285672e-107	-1.56935	0.535	0.744	2.81568986566225e-103
Plb1	1.59688489639007e-107	-4.30487	0.012	0.186	3.88570001838596e-103
Gch1	2.11776883015777e-107	1.20374	0.57	0.153	5.15316689442291e-103
Rpl37a	3.63669136705075e-107	-0.68663	0.926	0.888	8.84916110344459e-103
Rpl23a	7.21841169113568e-107	-0.624291	0.949	0.896	1.75645611680404e-102
Klhl24	9.45681996120829e-107	0.815935	0.836	0.552	2.30112800116081e-102
Tmc4	1.02010575352122e-106	0.607898	0.928	0.732	2.48222333004318e-102
Eid1	1.02423988009164e-106	-2.47134	0.108	0.39	2.49228290022698e-102
Aqp11	1.31595086467261e-106	-3.77421	0.025	0.222	3.20210323900785e-102
Gsn	2.49931512048141e-106	-2.34961	0.247	0.542	6.08158348266742e-102
Ranbp1	3.02724904680261e-106	-1.60435	0.604	0.751	7.36620510558478e-102
Chpt1	4.22275871217341e-106	-1.9716	0.505	0.719	1.02752387743316e-101
Npas2	7.57397759518572e-106	1.07481	0.849	0.52	1.84297596823654e-101
H3f3a	8.3089183667506e-106	-0.6848	0.949	0.884	2.02180910618142e-101
Fbl	1.02135532585723e-105	-1.52455	0.497	0.714	2.4852639144084e-101
Cenpf	1.70262785492598e-105	-6.34944	0.007	0.165	4.14300435939139e-101
Marchf3	2.02503709598249e-105	1.52593	0.666	0.271	4.92752276565419e-101
Slfn5	4.91051151599496e-105	1.71024	0.53	0.124	1.19487476718705e-100
Rplp0	6.09388153694878e-105	-0.69477	0.938	0.892	1.48282419438575e-100
Lpar1	6.19535695492135e-105	1.08286	0.871	0.606	1.50751620784101e-100
Irf1	6.6946922171139e-105	0.941602	0.759	0.417	1.62901945719032e-100
Tgfbr2	8.31405896501045e-105	0.943748	0.891	0.658	2.02305996795599e-100
Rhpn2	8.88459048060527e-105	0.801606	0.881	0.642	2.16188740164568e-100
Irag2	1.53687294868738e-103	1.27686	0.612	0.195	3.739672946041e-99
Dnph1	1.81810861271305e-103	-3.31759	0.03	0.231	4.42400368731467e-99
Med24	1.92049505709116e-103	-1.69489	0.434	0.695	4.67314062241993e-99
Rnd3	1.94882518362779e-103	1.23249	0.825	0.502	4.7420763193215e-99
Dusp16	2.40954040020525e-103	0.840504	0.896	0.627	5.86313465581944e-99
Nop58	3.23728949094689e-103	-1.2539	0.651	0.777	7.87729651832106e-99
Slc37a1	3.81186482948052e-103	1.13199	0.758	0.422	9.27541068957495e-99
Tmem254	4.67343424714811e-103	-1.67964	0.452	0.688	1.13718675535855e-98
Lgi2	6.80097756956096e-103	-2.75939	0.055	0.292	1.65488187200127e-98
Pfn1	7.59696369352169e-103	-0.817628	0.887	0.855	1.84856917554463e-98
Lrpap1	7.69435540225444e-103	-1.73505	0.463	0.69	1.87226750003057e-98
Stat2	1.02468065734275e-102	1.01488	0.725	0.36	2.49335544351212e-98
Dram1	1.07103540250343e-102	-3.34329	0.032	0.237	2.60615044491159e-98
Rpl19	1.09944505269649e-102	-0.576346	0.957	0.913	2.67527964672636e-98
Rpl9	1.17939108021803e-102	-0.756934	0.933	0.876	2.86981231549452e-98
Gja1	1.21929887850699e-102	1.76355	0.524	0.14	2.96691996107106e-98
Cnbp	1.84918017453577e-102	-1.16511	0.744	0.771	4.49961011869788e-98
Nucb2	2.16265994883943e-102	1.30329	0.699	0.367	5.26240045351098e-98
Zhx2	2.27774847602848e-102	1.2766	0.654	0.281	5.54244536672011e-98
Btf3	2.99936575379646e-102	-0.876391	0.851	0.834	7.29835668871293e-98
Far2os1	3.05990125727471e-102	-5.18581	0.006	0.156	7.44565772932656e-98
Cd164	4.39853325753938e-102	0.765264	0.874	0.689	1.07029509755706e-97
Cct6a	4.86202473251191e-102	-1.20129	0.72	0.769	1.18307647816212e-97
Ankrd37	5.11469326914858e-102	1.51448	0.511	0.116	1.24455831318192e-97
Idh2	5.45726278428468e-102	-1.89244	0.23	0.544	1.32791575329999e-97
Arhgap31	6.56501647222572e-102	-4.22583	0.009	0.167	1.59746545818668e-97
Nme1	7.91266746116998e-102	-1.47243	0.431	0.708	1.92538937332649e-97
Hnrnpf	1.12821675325259e-101	-0.832998	0.898	0.847	2.74528982568952e-97
Cd68	1.35535524565042e-101	2.08802	0.494	0.113	3.29798591924116e-97
Dtymk	2.21840479507694e-101	-1.80493	0.34	0.617	5.39804438786072e-97
Ptprs	3.99148220317995e-101	0.750901	0.906	0.695	9.71247364499777e-97
Atp8b1	4.65440654918046e-101	0.721091	0.962	0.827	1.13255674561208e-96
Ptprh	4.90414809500972e-101	1.84263	0.471	0.09	1.19332635595872e-96
Slc34a2	6.81958786432184e-101	1.91142	0.456	0.075	1.65941031502543e-96
Rab20	8.50817160020993e-101	-1.84508	0.376	0.65	2.07029339547908e-96
Tgif1	1.10438537026967e-100	0.915165	0.816	0.548	2.68730092147719e-96
Fundc2	1.28356472612225e-100	-1.955	0.207	0.516	3.12329804807328e-96
Cblc	1.73420895361817e-100	0.854681	0.811	0.518	4.2198506468391e-96
Rasal2	2.60817909502577e-100	0.992279	0.82	0.525	6.34648219192621e-96
Entrep1	5.61565948434191e-100	-2.49258	0.172	0.467	1.36645842232492e-95
Fam135a	8.89869731151307e-100	0.926604	0.852	0.59	2.16532001681048e-95
Tkt	9.95392438700244e-100	-1.2972	0.668	0.755	2.4220884210893e-95
Gsta4	1.51094306270852e-99	-1.63782	0.416	0.675	3.67657775448863e-95
Fer1l4	1.64345722407193e-99	1.54167	0.517	0.136	3.99902446333423e-95
Pla2g5	2.10580985069375e-99	-3.26998	0.02	0.2	5.12406710969311e-95
Cavin3	3.23865310391138e-99	1.349	0.62	0.226	7.88061459774756e-95
Rgl3	4.62188107491752e-99	0.697154	0.846	0.576	1.12464232195968e-94
St13	4.96626317785483e-99	-1.00003	0.87	0.837	1.20844081906742e-94
Rin2	7.30450897249468e-99	0.826019	0.827	0.544	1.77740616827713e-94
Snrpe	9.04332705397667e-99	-1.26997	0.658	0.761	2.20051277204414e-94
Cp	9.48389158774482e-99	1.3469	0.709	0.363	2.30771534004595e-94
Gstm7	1.19478278834763e-98	-4.15393	0.047	0.262	2.90726495888629e-94
Bnip3	1.36666921076379e-98	1.64945	0.487	0.11	3.32551619055152e-94
Ier3	1.73764525251587e-98	1.19765	0.912	0.715	4.22821219294688e-94
Tmem100	2.62926582160802e-98	-5.80698	0.003	0.14	6.3977925237188e-94
Trim15	2.8863124337571e-98	2.28233	0.511	0.126	7.02326404506115e-94
Epas1	3.00271802633334e-98	1.20682	0.724	0.388	7.30651377347691e-94
Tshz2	5.86561277364598e-98	0.811097	0.969	0.836	1.42727955621128e-93
Ucp2	6.58319010312415e-98	-1.31197	0.613	0.749	1.6018876477932e-93
Ephb2	8.99974422300879e-98	0.808401	0.935	0.784	2.18990776178473e-93
Psmd3	1.09568326223172e-97	-1.20844	0.689	0.762	2.66612608198844e-93
Ldlrad4	1.49387925340292e-97	0.971706	0.973	0.861	3.63505638730533e-93
Prmt1	1.71778303338216e-97	-1.54759	0.428	0.673	4.17988145512881e-93
Wasl	1.99341365974169e-97	0.883704	0.94	0.789	4.85057345824945e-93
Fkbp3	2.70384521573723e-97	-1.61627	0.434	0.676	6.5792665634534e-93
Rpl31	4.00831662294729e-97	-0.73887	0.894	0.861	9.75343683861763e-93
Fbxw11	4.02842239807743e-97	0.786266	0.937	0.755	9.8023602212418e-93
Pa2g4	4.78456864937523e-97	-1.3302	0.643	0.749	1.16422908945248e-92
Ell2	7.33746127105464e-97	1.04015	0.809	0.484	1.78542445108573e-92
Tln2	7.80685159718473e-97	-2.00281	0.165	0.464	1.89964119914296e-92
Npl	9.97598982986866e-97	-5.86354	0.005	0.143	2.42745760530194e-92
Elmo1	1.22612174782062e-96	1.01216	0.868	0.646	2.98352204897191e-92
Stmn1	1.26920744273951e-96	-2.69878	0.203	0.491	3.08836247041805e-92
Ppp2r3a	1.29856630063764e-96	0.798079	0.948	0.809	3.15980137934157e-92
Abi1	3.81868441302541e-96	0.651955	0.971	0.823	9.29200478221473e-92
Far2	4.36592990757779e-96	-5.30651	0.006	0.149	1.0623617244109e-91
Stk38	1.02850902317417e-95	0.549835	0.976	0.863	2.50267100608972e-91
Nedd4l	1.25259887085997e-95	0.780064	0.951	0.783	3.04794883246356e-91
Myo5b	1.33468772836009e-95	0.862408	0.934	0.728	3.24769564941861e-91
Tpt1	1.52911561316679e-95	-0.550727	0.981	0.958	3.72079702151875e-91
Ltbp2	1.62820186522354e-95	2.08684	0.408	0.05	3.96190359864845e-91
Nop10	3.57761726448103e-95	-1.35188	0.537	0.73	8.70541608966168e-91
Med13l	4.31336254437384e-95	0.682259	0.967	0.795	1.04957050792249e-90
Foxo1	5.25568032625609e-95	0.964583	0.932	0.744	1.27886469378789e-90
Psat1	7.98664291906792e-95	-2.22326	0.099	0.36	1.9433898214968e-90
Macc1	8.3652615586885e-95	0.826384	0.924	0.716	2.03551909507567e-90
Eif3a	8.75002855707209e-95	-0.669806	0.953	0.88	2.12914444879235e-90
Snrpg	1.03292076650414e-94	-1.27858	0.639	0.757	2.51340610113453e-90
Pxk	1.39357597600461e-94	1.00637	0.72	0.384	3.39098842241201e-90
Cdk1	1.49610870211703e-94	-4.67053	0.015	0.177	3.64048130486136e-90
Clca3b	1.84069097279008e-94	2.64804	0.434	0.07	4.47895334409011e-90
Gcnt2	1.90018508964085e-94	-1.21508	0.864	0.848	4.62372037862307e-90
Hk2	2.27493163671027e-94	0.937211	0.888	0.688	5.5355911516071e-90
Pitpnm2	2.37570631703385e-94	-2.45388	0.073	0.313	5.78080618123847e-90
Mt2	3.01492146594981e-94	-1.54831	0.309	0.622	7.33620840309568e-90
Id1	3.67191805727786e-94	-1.92781	0.294	0.6	8.93487820877422e-90
Rhoq	4.48117344389957e-94	1.01043	0.763	0.467	1.09040393410408e-89
Nbea	7.40189606018989e-94	-0.834228	0.963	0.889	1.80110336832601e-89
Rbm3	9.82833925042579e-94	-1.21895	0.701	0.766	2.39152978980611e-89
Osmr	1.5790220623607e-93	1.11701	0.72	0.401	3.84223438434229e-89
Prkch	1.75750526559218e-93	1.05974	0.833	0.596	4.27653756276545e-89
Apex1	2.20225953559815e-93	-1.55906	0.368	0.654	5.35875812797097e-89
Chdh	2.44365069641054e-93	-1.39685	0.672	0.775	5.94613523957576e-89
Kalrn	2.60596567055548e-93	1.93754	0.545	0.19	6.34109626616265e-89
Hnrnpa1	2.73048925666707e-93	-1.18373	0.757	0.787	6.64409950824799e-89
Gbp2	2.75826321422907e-93	2.54766	0.419	0.067	6.71168187918359e-89
Relb	2.7607104345021e-93	1.61158	0.481	0.12	6.71763670027396e-89
Hnrnpu	3.14565189767938e-93	-0.574113	0.974	0.906	7.65431476262324e-89
Oasl1	3.91757459831889e-93	1.40397	0.576	0.186	9.53263427008936e-89
Nrp1	5.01533507782531e-93	-2.26208	0.098	0.359	1.22038148448723e-88
Anxa2	7.56113877906235e-93	0.730161	0.957	0.852	1.83985189910924e-88
Clca3a2	1.01290502665923e-92	2.78109	0.426	0.063	2.4647018013699e-88
Adh5	1.05652208353823e-92	-1.79595	0.259	0.551	2.57083518587357e-88
Hivep1	1.07163791546271e-92	0.76807	0.895	0.678	2.60761653969541e-88
Adcy8	1.52794950552186e-92	-7.49993	0	0.118	3.71795953178634e-88
Mxi1	1.6132172762933e-92	0.999088	0.733	0.421	3.92544159840449e-88
Adgrl3	1.74953810903377e-92	-1.54359	0.415	0.686	4.25715108071188e-88
Pdlim7	2.10341366863803e-92	0.790124	0.877	0.64	5.11823647989691e-88
Psip1	4.73987280780096e-92	-1.90357	0.308	0.584	1.15335325032221e-87
Cnn3	4.88895959446976e-92	-2.0189	0.33	0.6	1.18963053812233e-87
Hmgn2	5.07606014364932e-92	-1.8782	0.318	0.595	1.23515771475419e-87
Parp8	5.96006014062447e-92	1.11833	0.745	0.42	1.45026143401815e-87
Rpl18a	7.03118913702018e-92	-0.609245	0.932	0.879	1.71089925271112e-87
D630045J12Rik	8.25265907034451e-92	-2.58274	0.063	0.292	2.00811953158693e-87
Nceh1	1.00383361858678e-91	1.25974	0.704	0.405	2.44262834410721e-87
Maged1	1.12647390437227e-91	-1.79845	0.223	0.518	2.74104895150904e-87
Selenoh	1.73148575818008e-91	-1.96184	0.263	0.543	4.21322429537959e-87
Pik3ap1	2.19186332808312e-91	-2.14105	0.203	0.49	5.33346103622466e-87
Nav3	3.4268500115461e-91	1.64758	0.455	0.093	8.33855413309514e-87
Slc25a5	4.07664688095594e-91	-1.17198	0.664	0.775	9.9197048554301e-87
Gtpbp2	4.64524573680438e-91	0.922404	0.705	0.396	1.13032764513661e-86
Nme2	5.46986838996811e-91	-1.18327	0.654	0.771	1.33098307533094e-86
Sgk1	6.31862345531873e-91	-2.57775	0.178	0.451	1.53751064538271e-86
Atic	8.1547333092545e-91	-1.50959	0.443	0.669	1.9842912561409e-86
Far2os2	1.4081111241059e-90	-5.2384	0.004	0.133	3.42635679828688e-86
Rpl29	1.67907655774712e-90	-0.907618	0.822	0.797	4.08569698796608e-86
Skap2	1.6902480262124e-90	0.834087	0.866	0.637	4.11288052218264e-86
Gfpt1	2.20560170931536e-90	0.693998	0.912	0.747	5.36689063927705e-86
Gm42716	2.22644702065956e-90	2.06425	0.439	0.089	5.41761353537091e-86
Tcf4	2.25850754822097e-90	0.895185	0.876	0.644	5.49562641708609e-86
Rdh10	2.73309767558321e-90	0.964802	0.852	0.634	6.65044657399662e-86
Tspan3	3.46571332485029e-90	-2.34081	0.103	0.356	8.4331202333582e-86
Msx1	3.93862352898727e-90	-1.81459	0.46	0.678	9.58385263308472e-86
Nod2	4.14782442997714e-90	1.96422	0.399	0.06	1.00929011854634e-85
Gm266	5.83591574049092e-90	-2.74152	0.053	0.267	1.42005337713366e-85
Parp9	1.49504523545593e-89	0.889131	0.801	0.542	3.63789357143491e-85
Eif3i	1.7137510087384e-89	-1.26456	0.603	0.732	4.17007032956315e-85
Irak2	2.46183419057216e-89	1.01309	0.821	0.575	5.99038113591924e-85
Eepd1	2.62046399812016e-89	1.19439	0.507	0.151	6.37637504662579e-85
Npm3	3.59151069701136e-89	-1.87468	0.176	0.462	8.73922297903774e-85
Galm	3.65739022990945e-89	-2.15044	0.199	0.481	8.89952764643866e-85
Apol7a	8.38022522752259e-89	2.10777	0.389	0.055	2.03916020461307e-84
Slc5a11	8.72210919181295e-89	-8.53177	0.001	0.116	2.12235082964385e-84
Endod1	8.72741088530534e-89	0.912509	0.766	0.497	2.12364089072135e-84
Parp1	1.0274176947093e-88	-1.66344	0.33	0.601	2.50001547653614e-84
Plpp1	1.35776545029961e-88	1.6848	0.523	0.166	3.30385067021403e-84
Siva1	1.45982766540976e-88	-2.44408	0.119	0.375	3.55219865824157e-84
Rerg	1.52962747394329e-88	2.39509	0.393	0.053	3.7220425323462e-84
Igf1r	1.88484145563584e-88	0.876812	0.962	0.844	4.5863847139987e-84
Pebp1	2.19905581502107e-88	-1.1648	0.673	0.766	5.35096251469077e-84
Meis2	2.34405055361892e-88	1.23122	0.654	0.304	5.70377821212092e-84
Wfdc15b	5.14725509793819e-88	-4.62965	0.006	0.139	1.2524815829813e-83
Fgd3	6.68934453252524e-88	1.11256	0.731	0.41	1.62771820509937e-83
Niban1	1.48092875761568e-87	1.1444	0.675	0.346	3.60354394590624e-83
Ncam1	1.97372370090935e-87	0.983137	0.952	0.821	4.80266188142271e-83
Zfp704	2.77371726302806e-87	-0.843794	0.939	0.867	6.74928621612619e-83
Rab40b	2.92294999071186e-87	-4.87126	0.009	0.146	7.11241421239918e-83
Glrx5	3.63753857485638e-87	-1.57448	0.385	0.638	8.85122261419802e-83
Sys1	3.86974535176959e-87	-1.62966	0.374	0.629	9.41625136446095e-83
Tor1aip2	4.60470620846099e-87	0.703524	0.903	0.726	1.12046316170481e-82
Slc44a1	4.79687176342543e-87	0.695913	0.888	0.679	1.16722280619431e-82
Gm15675	7.95848921078881e-87	1.18812	0.621	0.283	1.93653917966124e-82
Frmd6	1.26282903084521e-86	1.27906	0.631	0.287	3.07284188075565e-82
Rab11fip1	1.49552303946425e-86	0.641827	0.911	0.711	3.63905621192836e-82
Tyms	2.34641434521395e-86	-2.45082	0.134	0.39	5.70953002620911e-82
Arl4c	2.42466974787046e-86	-1.23895	0.718	0.773	5.89994889749319e-82
Nradd	2.71655836742233e-86	-2.01796	0.14	0.407	6.61020147544876e-82
Plce1	3.77387795640459e-86	0.781186	0.926	0.779	9.18297723131928e-82
Specc1	3.81620135457151e-86	0.85103	0.879	0.669	9.28596275607885e-82
Marf1	4.91408451793921e-86	0.637538	0.909	0.713	1.19574418575015e-81
Pla2g10	7.18609577548848e-86	-6.95573	0.001	0.111	1.74859268504961e-81
H1f10	1.02573333141724e-85	-4.13445	0.01	0.149	2.49591691533757e-81
Tspan33	1.43191166232338e-85	0.960706	0.619	0.28	3.48427064793148e-81
C1qbp	1.63868287109524e-85	-1.39427	0.486	0.692	3.98740703023604e-81
Atrnl1	1.69388642477586e-85	0.648847	0.986	0.883	4.12173383740709e-81
Ppat	2.35159499845633e-85	-1.72148	0.258	0.546	5.72213610974379e-81
Hopx	2.85332878812173e-85	-3.26711	0.062	0.275	6.9430049401366e-81
Arhgap21	3.09925369170258e-85	0.708737	0.921	0.751	7.5414140080199e-81
Cobll1	3.60750683298158e-85	1.38025	0.622	0.302	8.77814637669407e-81
Myc	3.94314394758618e-85	-2.28451	0.151	0.415	9.59485216766146e-81
Rasa4	3.9639218090027e-85	1.38325	0.47	0.115	9.64541093784628e-81
Zc3hav1	5.32242991185741e-85	0.848053	0.851	0.615	1.29510687045226e-80
Pbk	6.04050151619092e-85	-7.07226	0.001	0.114	1.46983523393474e-80
Tcp1	6.12650296230884e-85	-1.12869	0.67	0.758	1.49076196581861e-80
Pik3r5	6.26525743181004e-85	2.38861	0.426	0.091	1.52452509088234e-80
Herc6	7.51707401166564e-85	1.52883	0.645	0.312	1.8291296192586e-80
Gpat3	1.18697199105811e-84	1.30669	0.502	0.156	2.88825894584169e-80
Zfand5	3.19530178180958e-84	0.874078	0.981	0.878	7.77512782567724e-80
Ttc9	3.2206816255822e-84	1.06278	0.758	0.467	7.83688459952916e-80
Snrpd3	4.99243429376515e-84	-1.27408	0.599	0.742	1.21480903670187e-79
Wnt4	5.88154804001683e-84	1.13687	0.62	0.307	1.4311570845773e-79
Srsf3	9.99529982986873e-84	-0.989345	0.859	0.808	2.43215630760196e-79
Mamld1	1.12983873382574e-83	-2.61253	0.054	0.261	2.74923659101817e-79
Id3	1.19787448782779e-83	-2.5343	0.093	0.329	2.91478799123136e-79
Tcf7l1	1.36311343024283e-83	-1.73153	0.139	0.42	3.31686390980988e-79
Meis1	1.6332356194603e-83	0.821544	0.974	0.888	3.97415223283275e-79
Nucb1	1.78595014881289e-83	0.851805	0.751	0.502	4.3457524971064e-79
Gm10076	2.70108493910928e-83	-0.89543	0.794	0.801	6.57254998233461e-79
Trio	3.21295087150533e-83	0.720719	0.951	0.776	7.81807335563391e-79
Ctsa	3.3358514390697e-83	1.05739	0.677	0.375	8.1171273066883e-79
Pgrmc1	4.4041535307238e-83	-1.59121	0.448	0.659	1.07166267863102e-78
Pparg	4.74971530900358e-83	2.30113	0.386	0.059	1.15574822613984e-78
Rpl37	6.89921151707735e-83	-0.545889	0.944	0.887	1.67878513845043e-78
Tbc1d1	1.17422512319519e-82	0.729503	0.947	0.782	2.85724199227086e-78
Mpzl3	1.25631619560371e-82	1.04896	0.626	0.304	3.05699419876251e-78
Tnfaip8	1.36584430020133e-82	0.877402	0.79	0.51	3.32350893567989e-78
Snx13	1.38793770997939e-82	0.750257	0.865	0.629	3.37726882969285e-78
P4ha1	2.22023900327722e-82	1.04751	0.63	0.288	5.40250756667446e-78
Rad51	2.38306574811336e-82	-4.78681	0.009	0.142	5.79871388488424e-78
Mcm3	2.55337923867817e-82	-2.98072	0.128	0.37	6.2131377014756e-78
5730471H19Rik	2.92383570226297e-82	-3.00959	0.032	0.207	7.11456941431647e-78
Elk3	3.02854440118096e-82	0.761954	0.907	0.728	7.36935709139363e-78
Mki67	3.8196163481503e-82	-5.50995	0.036	0.211	9.29427245995414e-78
B2m	4.13930883839253e-82	0.739004	0.915	0.785	1.00721801964605e-77
Plch1	5.04129203741033e-82	0.792571	0.86	0.623	1.22669759146306e-77
Fbln5	5.12237414380495e-82	-4.59783	0.005	0.128	1.24642730041206e-77
Lpgat1	6.06313521955257e-82	0.901142	0.903	0.769	1.47534269297373e-77
Gulp1	7.95680334566859e-82	-1.50348	0.223	0.525	1.93612895810154e-77
Kcnt2	8.50192949042409e-82	-2.09183	0.19	0.464	2.06877450290489e-77
Mphosph8	8.67091242607242e-82	-1.3219	0.669	0.767	2.1098931206362e-77
Sqstm1	1.40327871659383e-81	1.16883	0.849	0.658	3.41459810108775e-77
Fau	2.01466740472037e-81	-0.507973	0.959	0.904	4.90229019590607e-77
Dkc1	2.5075670769975e-81	-1.61779	0.285	0.558	6.10166296845802e-77
Adgrf1	3.09359258728238e-81	1.47438	0.38	0.055	7.52763884263422e-77
Ctss	3.23635132545986e-81	1.31484	0.48	0.136	7.87501368024148e-77
Dlx6os1	4.21896755715451e-81	1.17242	0.805	0.578	1.02660137568241e-76
Grn	5.11385354893146e-81	0.744244	0.858	0.706	1.24435398406149e-76
Hint1	5.25017793837185e-81	-1.23203	0.588	0.737	1.27752579774402e-76
Rad51b	6.82585987468059e-81	-2.46608	0.136	0.39	1.66093648330603e-76
Tsc22d3	7.92081725868014e-81	-1.62799	0.241	0.518	1.92737246355464e-76
Dtnb	9.98775953091741e-81	1.12006	0.77	0.494	2.43032152665813e-76
Apobec2	1.22526403743494e-80	1.61342	0.471	0.127	2.98143498229044e-76
Erh	1.44163447222297e-80	-1.28995	0.574	0.712	3.50792916126015e-76
Cbs	1.45225196637597e-80	-5.43816	0.006	0.127	3.53376470978264e-76
Adam8	1.54414394605499e-80	2.65024	0.344	0.037	3.75736546393561e-76
Sult1a1	2.89273007207194e-80	-5.82461	0.002	0.112	7.03888008437265e-76
Gkap1	3.20592209141864e-80	-2.10074	0.094	0.329	7.80097022504897e-76
Tipin	3.2074137015011e-80	-2.54774	0.099	0.331	7.80459975986262e-76
Atp6v0a1	4.19876515918306e-80	0.877529	0.772	0.506	1.02168552618401e-75
Mitf	5.42083741166649e-80	-3.28117	0.054	0.252	1.31905236738081e-75
Luc7l2	6.17609835414602e-80	0.40116	0.987	0.901	1.50283001251435e-75
Trim7	8.7014361261346e-80	1.74737	0.359	0.047	2.11732045257233e-75
Pclaf	1.07807476863878e-79	-4.78299	0.025	0.184	2.62327933452873e-75
Igsf9b	1.10339005156398e-79	1.8073	0.384	0.066	2.68487901247063e-75
Nhsl1	1.17129283554034e-79	0.689827	0.923	0.749	2.85010685672032e-75
Rab11fip5	1.45355700133238e-79	1.36129	0.48	0.149	3.53694025134208e-75
Enpp1	1.68534123088069e-79	-2.80145	0.069	0.282	4.10094081710199e-75
Snhg4	1.83805381026697e-79	-1.88983	0.18	0.448	4.47253633652263e-75
Asrgl1	2.05484088826554e-79	-2.71225	0.037	0.217	5.00004433341654e-75
Akr1c19	2.34824958322749e-79	-1.92667	0.122	0.373	5.71399571086745e-75
Srsf2	3.05394493666101e-79	-1.09768	0.727	0.782	7.43116421437723e-75
Rras2	3.8401025951433e-79	0.678432	0.904	0.726	9.3441216447622e-75
Sdc4	4.36371857897948e-79	-0.971695	0.843	0.817	1.06182364182308e-74
Snrpf	5.70195605822702e-79	-1.27138	0.557	0.715	1.38745696764838e-74
Uhrf1	8.00310360876991e-79	-3.4552	0.07	0.277	1.94739520112198e-74
Pole	1.00197333955394e-78	-4.96444	0.007	0.13	2.43810172713661e-74
Arsj	1.75506967836845e-78	-4.98207	0.005	0.121	4.27061104837396e-74
Kif4	2.29371625370613e-78	-5.94079	0.007	0.127	5.58129976014313e-74
Pgr	2.36740625574037e-78	-1.4598	0.553	0.724	5.76060964209303e-74
Cct5	2.49539966748833e-78	-1.06384	0.691	0.751	6.07205601089936e-74
Lsm7	2.97779078852853e-78	-1.26594	0.52	0.709	7.24585832572648e-74
Eif5a	3.37785418323565e-78	-0.911616	0.785	0.806	8.21933258406732e-74
Smc2	4.15684105422711e-78	-2.62289	0.132	0.373	1.01148413372508e-73
Fgd6	4.42140130097515e-78	0.733519	0.866	0.655	1.07585957856628e-73
Sprr2b	4.67453300814126e-78	2.11088	0.388	0.067	1.13745411687101e-73
Snu13	6.1792655607685e-78	-1.20318	0.578	0.717	1.5036006889018e-73
Atp10b	7.17217844273831e-78	0.643995	0.96	0.79	1.74520618047151e-73
Micos10	8.68932280167314e-78	-1.03769	0.686	0.76	2.11437291733112e-73
Slc39a8	8.93896553181314e-78	0.875806	0.733	0.422	2.17511848285609e-73
Eif1	1.04614864001082e-77	-0.646393	0.897	0.862	2.54559348573833e-73
Tec	1.20265465976144e-77	0.702424	0.888	0.664	2.92641958359751e-73
Igdcc3	1.32667854496668e-77	-3.74659	0.012	0.146	3.22820690346743e-73
Mprip	2.21066605955258e-77	0.457138	0.973	0.838	5.37921372270929e-73
Mapk6	2.21479349587071e-77	0.761606	0.799	0.562	5.38925701350221e-73
Homer2	2.32238346459243e-77	1.74422	0.466	0.146	5.65105568439277e-73
Atp5g2	2.71816435582451e-77	-0.966154	0.707	0.777	6.61410932702777e-73
Dock4	3.80840107489062e-77	0.867982	0.789	0.515	9.26698233553136e-73
Lamp2	5.89142302404408e-77	0.513225	0.97	0.869	1.43355996444065e-72
Ascc3	7.93990597929927e-77	0.604595	0.965	0.84	1.93201732194289e-72
Il36g	1.12491631108981e-76	4.35278	0.306	0.02	2.73725885977484e-72
Stk25	1.15260491120466e-76	0.957961	0.754	0.497	2.8046335304343e-72
Eef1g	2.06094855101111e-76	-0.706655	0.888	0.835	5.01490610917533e-72
Ctnnd2	2.44744772030177e-76	-2.24514	0.105	0.341	5.9553745378103e-72
Rtn4	3.43884994622372e-76	0.554792	0.98	0.881	8.36775357414619e-72
App	5.26559259591247e-76	0.501582	0.988	0.905	1.28127664636338e-71
Bach1	8.28745260862729e-76	0.9533	0.587	0.268	2.01658584325728e-71
Fbxo32	9.10682195179916e-76	1.26647	0.528	0.209	2.21596298553129e-71
Cxcl17	1.10781916716e-75	0.770759	0.9	0.769	2.69565637945042e-71
Cyp26a1	1.27780062089122e-75	-6.65746	0.001	0.098	3.1092722508146e-71
Wdr43	1.28864074906518e-75	-1.11492	0.629	0.749	3.13564953470029e-71
Cdc42bpb	1.47815015230629e-75	0.779116	0.886	0.698	3.59678276560689e-71
Gm20186	1.69220894768495e-75	1.44416	0.673	0.395	4.11765203240179e-71
Rps28	1.82915583982704e-75	-0.694127	0.876	0.84	4.45088490505114e-71
Psma7	1.86952484764499e-75	-0.918282	0.779	0.792	4.54911481177456e-71
Scnn1b	2.04001726419051e-75	2.01827	0.332	0.036	4.96397400895476e-71
Tns3	2.41677404833997e-75	0.656069	0.926	0.753	5.88073629182566e-71
Tbc1d22a	4.03633872660406e-75	0.838814	0.777	0.528	9.82162302344565e-71
Sem1	4.38749998008929e-75	-0.648745	0.899	0.847	1.06761037015513e-70
Otud3	4.47089463425532e-75	1.14984	0.613	0.305	1.08790279135335e-70
Nfkbia	5.45325189367929e-75	1.14538	0.911	0.801	1.32693978328898e-70
Pik3c2b	5.47647734685574e-75	1.10426	0.639	0.351	1.33259123281041e-70
Cyba	6.07862999943366e-75	0.686543	0.883	0.766	1.47911303776219e-70
Phf11d	7.98979078652865e-75	1.02417	0.647	0.335	1.94415579208602e-70
Cadm1	9.55978914688366e-75	0.79765	0.86	0.628	2.3261834931112e-70
Tjp3	1.25419149602453e-74	0.522963	0.819	0.579	3.05182416727648e-70
Snrpd1	1.27558796040163e-74	-1.16943	0.63	0.733	3.10388818404529e-70
Top2a	1.84316764333281e-74	-4.22434	0.088	0.3	4.48497982652173e-70
Ccna2	2.04376552269956e-74	-6.4634	0.003	0.107	4.97309464638485e-70
Sox4	2.28412447901458e-74	0.626612	0.878	0.709	5.55796009478617e-70
Lcorl	2.44094246973767e-74	0.551827	0.965	0.838	5.93954531161268e-70
Cdk17	2.81596653333955e-74	0.889464	0.772	0.521	6.85209136557513e-70
Kntc1	3.01214843649881e-74	-6.57934	0.002	0.103	7.32946079053257e-70
Adamts6	3.4940058388122e-74	-1.62137	0.42	0.657	8.50196440758174e-70
Ifit1bl1	3.63716615422606e-74	1.78242	0.355	0.051	8.85031640307827e-70
Cdk4	4.29395579978493e-74	-1.3096	0.541	0.69	1.04484826476167e-69
Tmem123	4.38619738103984e-74	-1.37691	0.591	0.715	1.06729340872842e-69
Nmral1	4.67003294459497e-74	-2.70812	0.056	0.247	1.13635911640829e-69
Stat5a	4.98722648107903e-74	-1.7551	0.195	0.457	1.21354181964096e-69
Man1a	5.18058721718368e-74	1.11785	0.619	0.302	1.2605922875573e-69
Knl1	7.95084504441373e-74	-5.47919	0.01	0.134	1.93467912465719e-69
Pcx	8.54888190262408e-74	-2.01148	0.257	0.515	2.08019943336552e-69
Ilf2	8.58153254225296e-74	-1.40104	0.377	0.618	2.08814431350641e-69
Trim30a	1.09618627133482e-73	0.997116	0.648	0.334	2.66735005403902e-69
Dtl	1.46776619848392e-73	-3.85443	0.034	0.196	3.57151549077092e-69
Nhp2	1.47224636235866e-73	-1.33342	0.424	0.653	3.58241707352734e-69
Gvin1	2.15910666237781e-73	1.83203	0.396	0.086	5.25375424156393e-69
Ywhae	2.50495780413288e-73	-0.588928	0.928	0.847	6.09531382479653e-69
Trak1	2.67481384264995e-73	0.631172	0.901	0.735	6.50862452332013e-69
Stx7	2.81588340813048e-73	0.688588	0.785	0.547	6.85188909700389e-69
mt-Co1	3.38467260469567e-73	0.493648	0.999	0.968	8.23592384900599e-69
Mcm4	3.63741561860565e-73	-2.59499	0.163	0.402	8.85092342475314e-69
Fuca1	4.34700080918689e-73	0.678069	0.846	0.689	1.05775570689945e-68
Atp5g1	4.64676810757215e-73	-1.03029	0.634	0.749	1.13069808361553e-68
Pola1	4.96455789066993e-73	-2.50553	0.18	0.429	1.20802587153671e-68
Las1l	6.47585973846287e-73	0.854009	0.862	0.695	1.57577095016017e-68
Rpl22l1	7.27381598413581e-73	-0.910447	0.759	0.79	1.76993764341977e-68
Tnrc18	9.27281805641035e-73	0.521746	0.926	0.772	2.25635481766633e-68
Bex3	1.02486075314996e-72	-2.03397	0.126	0.361	2.49379367063979e-68
Cep55	1.11185464425209e-72	-5.71471	0.005	0.112	2.70547590585861e-68
Marcksl1	1.159859071357e-72	-1.4202	0.563	0.7	2.82228507833299e-68
Lgals3bp	1.80399597025678e-72	0.720752	0.684	0.393	4.38966339442581e-68
Elovl5	1.83191270090433e-72	-1.0687	0.825	0.811	4.4575931751105e-68
Hook2	2.21047701500459e-72	0.596233	0.743	0.48	5.37875372061067e-68
Alyref	3.35381153581631e-72	-1.33702	0.53	0.688	8.16082961010182e-68
Gstp1	3.58150890777394e-72	-2.14355	0.079	0.286	8.71488562528632e-68
Esyt2	3.83716173675468e-72	0.865273	0.881	0.686	9.33696565404516e-68
Cbx6	3.99425786464467e-72	-1.60985	0.268	0.533	9.71922766203987e-68
Zfand3	4.13044875880904e-72	0.568387	0.971	0.834	1.005062096481e-67
Mcm5	4.24769456399991e-72	-3.51263	0.027	0.18	1.0335915182581e-67
Ets2	5.57644175958396e-72	0.703244	0.901	0.732	1.35691557335956e-67
Cct2	5.83414442988851e-72	-0.832097	0.809	0.801	1.41962236412477e-67
Zcchc2	6.59267953628311e-72	0.891223	0.818	0.609	1.60419671156377e-67
Apaf1	8.21737819297668e-72	0.813296	0.614	0.296	1.99953463569702e-67
Slc28a3	9.32745119049494e-72	0.944367	0.835	0.624	2.26964869818313e-67
Bub1b	9.46203980962018e-72	-4.70728	0.009	0.127	2.30239814687488e-67
Macroh2a2	9.91681799789042e-72	-5.02094	0.005	0.111	2.41305932342668e-67
Arhgap42	1.23661003674924e-71	-1.30382	0.719	0.769	3.00904320242193e-67
Lsm5	1.71142342106246e-71	-1.71322	0.24	0.498	4.16440661047129e-67
Noxo1	2.05000028262466e-71	1.95689	0.328	0.044	4.98826568771059e-67
Paox	2.07159478164727e-71	0.686385	0.805	0.588	5.0408115821823e-67
Gm15283	2.24687643427173e-71	1.38172	0.565	0.261	5.4673244275134e-67
Rflnb	2.6613157470045e-71	1.09591	0.657	0.38	6.47577960718605e-67
Malt1	2.8667612558484e-71	0.866294	0.75	0.5	6.97569016385591e-67
Arhgap18	3.72185701953728e-71	-1.64738	0.256	0.527	9.05639468564005e-67
Mybbp1a	3.91747730934558e-71	-1.14067	0.579	0.733	9.53239753683061e-67
Rnf169	5.32972817629712e-71	0.689311	0.871	0.664	1.29688275713838e-66
Sik3	5.56284626010722e-71	0.677822	0.942	0.777	1.35360738047189e-66
Gm15987	6.31576856442627e-71	1.92256	0.359	0.059	1.53681596478184e-66
Hspa4	8.00195451023434e-71	-0.641679	0.911	0.83	1.94711559097532e-66
H2-D1	1.38774198679563e-70	0.663823	0.912	0.78	3.37679257646982e-66
Zfyve9	1.55860967976161e-70	-1.71015	0.28	0.54	3.79256493376393e-66
Unc93b1	1.622152118307e-70	1.01907	0.595	0.301	3.94718274947642e-66
Gng10	1.8764170748778e-70	-1.9853	0.116	0.343	4.56588566830015e-66
D17H6S56E-5	2.23437190414927e-70	1.08713	0.724	0.454	5.43689715436641e-66
Stip1	2.58736720539996e-70	-1.27423	0.518	0.688	6.29584062089973e-66
Eef2	2.9778757779746e-70	-0.669869	0.92	0.851	7.2460651305456e-66
Prim1	4.43864445115315e-70	-3.42933	0.032	0.188	1.0800553542991e-65
Eif4g1	5.09911997800909e-70	-0.694023	0.901	0.833	1.24076886424895e-65
Egln1	5.25128420792878e-70	0.587505	0.935	0.812	1.27779498631531e-65
Pitpnc1	5.57948342766663e-70	0.696379	0.888	0.669	1.35765570245412e-65
Wwox	6.07940022166166e-70	0.715478	0.888	0.681	1.47930045593693e-65
Zmpste24	6.55812012577933e-70	-1.66885	0.461	0.639	1.59578737020588e-65
Creb5	7.53897930277366e-70	2.14406	0.371	0.078	1.83445983374392e-65
Dtx3l	8.15535894586114e-70	0.696191	0.731	0.49	1.98444349229639e-65
Plekhg5	9.37327129181007e-70	-1.91471	0.117	0.346	2.28079810343614e-65
Cpeb4	1.18397883114327e-69	0.794646	0.753	0.486	2.88097568982092e-65
Ece1	1.4456043935242e-69	0.725495	0.806	0.591	3.51758917076242e-65
Optn	1.61893422790241e-69	1.06175	0.589	0.286	3.93935265675494e-65
Mvp	1.64876458569981e-69	1.07439	0.653	0.376	4.01193886638336e-65
Ifrd2	1.79449540815985e-69	-1.75157	0.183	0.433	4.36654567667537e-65
Mthfd1	1.83577122956416e-69	-1.54666	0.266	0.52	4.46698213289847e-65
Prkce	2.29624466268065e-69	0.769126	0.799	0.544	5.58745213770084e-65
Rps6ka1	2.47501444828067e-69	0.652592	0.832	0.642	6.02245265700136e-65
Pcsk6	3.04981729581661e-69	1.08989	0.594	0.27	7.42112042591055e-65
Tor1aip1	3.32913529470917e-69	0.704018	0.819	0.602	8.10078491261583e-65
Gm1965	4.01251427800575e-69	2.60103	0.312	0.038	9.76365099267138e-65
Lsm2	4.10083262331199e-69	-1.651	0.285	0.526	9.97855602230506e-65
Lmo4	4.75766087849741e-69	0.722363	0.734	0.489	1.15768162156477e-64
E330013P04Rik	4.90816030798011e-69	-2.57411	0.08	0.281	1.1943026477408e-64
Pkm	1.23339843185827e-68	0.55111	0.851	0.667	3.00122840424072e-64
Cyp2j6	1.24299097571181e-68	1.02244	0.561	0.26	3.02456994119956e-64
Nlgn2	1.39826050919994e-68	1.66501	0.36	0.073	3.40238729703621e-64
Pkhd1	1.45251381087427e-68	-1.30427	0.384	0.643	3.53440185600036e-64
Trip10	1.54699675251634e-68	0.693691	0.809	0.598	3.76430719789802e-64
Ier5	1.82358934607553e-68	1.17621	0.469	0.165	4.43733995580559e-64
Chchd2	2.0123285266028e-68	-0.777496	0.809	0.806	4.8965990037826e-64
Mtr	2.15003993544908e-68	-1.74988	0.204	0.456	5.23169217492825e-64
Rnf38	2.27750652988729e-68	0.671017	0.843	0.642	5.54185663917475e-64
Cryab	3.81412654007831e-68	-2.10797	0.056	0.238	9.28091410997256e-64
Trim6	3.92269464998836e-68	1.58612	0.389	0.096	9.54509289181668e-64
Tnfaip2	4.03129123809488e-68	1.89118	0.436	0.14	9.80934096965627e-64
Cap2	4.69181565864583e-68	-1.63795	0.269	0.527	1.14165950421829e-63
Lrrc58	4.75505654031272e-68	-1.03352	0.723	0.76	1.15704790795429e-63
Ncaph	6.3993126972534e-68	-3.50718	0.019	0.153	1.55714475862267e-63
Mcm6	6.69979859734287e-68	-2.64704	0.139	0.359	1.63026199269144e-63
Sprr2a3	6.75059221501436e-68	1.9117	0.474	0.171	1.64262160367944e-63
Hsd17b10	7.56710921938917e-68	-1.47048	0.298	0.549	1.84130468635397e-63
Cdk19	7.85991438161848e-68	0.583409	0.839	0.617	1.91255296647922e-63
Bub1	7.87858792472533e-68	-5.28019	0.005	0.107	1.91709679972341e-63
Vegfa	8.333518532604e-68	0.903479	0.674	0.417	2.02779506453853e-63
Zfp512b	8.37986306077099e-68	-1.91403	0.135	0.371	2.03907207857741e-63
Cdc45	1.17410130629221e-67	-5.17013	0.003	0.101	2.85694070860084e-63
Phf14	1.18315488188456e-67	0.547369	0.953	0.825	2.87897077408969e-63
Prps2	1.18349120902387e-67	-2.23116	0.081	0.282	2.87978915891778e-63
Eif4a1	1.26718866960826e-67	-0.591246	0.914	0.851	3.08345018975779e-63
Nop56	1.35584606715152e-67	-1.15338	0.578	0.735	3.29918023519979e-63
Sumo2	1.53620552053962e-67	-0.950254	0.754	0.764	3.73804889312905e-63
Gpbp1l1	1.61169947939712e-67	0.536259	0.906	0.734	3.92174834321702e-63
Stxbp3	1.98650804228502e-67	0.788522	0.818	0.612	4.83377001929214e-63
Tex15	2.22957038738741e-67	-2.96623	0.02	0.155	5.42521362362978e-63
Slc41a2	2.27228335446375e-67	1.55958	0.374	0.085	5.52914708641665e-63
Farp1	2.89822260288815e-67	0.599786	0.951	0.813	7.05224505960772e-63
Hydin	3.07858956297645e-67	-3.23972	0.024	0.166	7.4911319835906e-63
Pcbd1	3.31220603341023e-67	-2.4919	0.058	0.239	8.05959094109711e-63
Shcbp1	3.71677830774397e-67	-6.23642	0.002	0.094	9.0440366562334e-63
Hmmr	4.19532493965603e-67	-5.53022	0.003	0.099	1.0208484175665e-62
Sh3rf1	5.64623018235016e-67	0.78649	0.982	0.9	1.37389719027126e-62
Gab1	6.47074878356428e-67	0.983761	0.664	0.381	1.5745273015047e-62
Kctd1	8.32768404664961e-67	-0.846381	0.919	0.86	2.02637535907125e-62
Alcam	9.00684208274551e-67	0.503506	0.999	0.974	2.19163488399447e-62
Ifngr1	1.00623406953043e-66	0.929701	0.758	0.545	2.44846936138841e-62
Greb1	1.35681101295e-66	-1.64499	0.197	0.453	3.30152823781124e-62
Birc5	1.58825496088056e-66	-5.32329	0.011	0.126	3.86470079631066e-62
Slc11a2	1.67597880959112e-66	1.34654	0.45	0.16	4.07815923737808e-62
Ctps	2.31554237901806e-66	-1.32396	0.284	0.55	5.63440927086466e-62
Aarsd1	2.3469662600951e-66	-1.76058	0.175	0.411	5.71087300068941e-62
Glo1	2.73335388461914e-66	-1.32112	0.409	0.628	6.65107000744375e-62
Sdk1	3.53847686841021e-66	-1.88637	0.48	0.653	8.61017576390257e-62
Gm30806	3.60499107163889e-66	1.64633	0.371	0.087	8.77202477461891e-62
Klf6	3.97062374384582e-66	1.0029	0.812	0.564	9.66171875590004e-62
Trim30d	4.61912094167739e-66	1.70199	0.392	0.107	1.12397069873836e-61
Elapor1	5.84844703540488e-66	-2.1879	0.058	0.24	1.42310261712507e-61
Auts2	6.53508654825387e-66	-1.3213	0.751	0.792	1.59018260978661e-61
Lnpep	7.45069984706079e-66	0.597641	0.913	0.751	1.8129787937853e-61
Ssrp1	7.82787419652022e-66	-1.24104	0.549	0.692	1.90475662823926e-61
Ugdh	8.567824737658e-66	1.16522	0.548	0.241	2.08480879341432e-61
Mpc2	8.78868645257235e-66	-1.27553	0.459	0.656	2.13855107450443e-61
Cacybp	8.95111965060716e-66	-1.22448	0.539	0.699	2.17807594458224e-61
Zfp710	8.95558638232897e-66	0.933115	0.7	0.427	2.17916283441211e-61
Ahsa1	1.22117486584354e-65	-1.39591	0.343	0.583	2.97148480105708e-61
Arhgef10	1.27340369186766e-65	-1.77629	0.119	0.345	3.09857320342157e-61
Gab2	2.16653693021637e-65	0.86206	0.745	0.482	5.27183431229548e-61
Aprt	2.29808249473066e-65	-1.38903	0.394	0.622	5.5919241344281e-61
2310043M15Rik	2.50488349086444e-65	-1.99605	0.093	0.301	6.09513299832043e-61
Skil	2.92173997454293e-65	0.62975	0.911	0.721	7.1094698800553e-61
Ikzf1	2.93273048783905e-65	-2.86084	0.036	0.19	7.13621309605877e-61
Usp32	3.05458901083877e-65	0.706128	0.855	0.652	7.43273144007399e-61
AA467197	3.54954757029221e-65	2.15104	0.302	0.038	8.63711410279203e-61
Ivns1abp	4.17074438510642e-65	-0.849302	0.838	0.825	1.01486723122795e-60
Nudt19	4.25429487355276e-65	-1.95336	0.149	0.377	1.03519757158159e-60
Rad54l	4.8649582042386e-65	-4.35775	0.012	0.128	1.18379027983738e-60
Bcl3	5.00391175250463e-65	0.903957	0.622	0.338	1.21760184673695e-60
Grb10	5.6258060547126e-65	-1.26028	0.553	0.709	1.36892738729322e-60
Mbp	6.4799946624264e-65	0.821441	0.574	0.281	1.57677710120822e-60
Galnt7	6.65707970202565e-65	0.606167	0.911	0.761	1.6198672038939e-60
Gvin2	7.46504315745748e-65	1.2881	0.374	0.086	1.81646895150413e-60
Cldn10	7.55894570979236e-65	-1.5361	0.348	0.581	1.83931825956377e-60
Slc16a3	7.78807252591759e-65	0.966626	0.318	0.045	1.89507168773153e-60
Ywhab	9.63674775750461e-65	-0.872711	0.77	0.769	2.3449098318336e-60
Syncrip	1.22653000869971e-64	-0.74566	0.881	0.829	2.98451547016899e-60
Slc7a1	1.54903683387249e-64	-1.24933	0.439	0.654	3.76927132786192e-60
Plekhs1	2.15779579091062e-64	-1.08747	0.651	0.76	5.25056449802282e-60
Them5	2.34345178844854e-64	-5.14029	0.003	0.093	5.70232123683183e-60
Golga4	2.72618712621749e-64	0.359124	0.985	0.908	6.63363113422502e-60
Snhg8	3.5073757440349e-64	-1.61493	0.249	0.494	8.53449739796012e-60
Shisa5	4.05196393092264e-64	0.727817	0.736	0.537	9.85964383311406e-60
Fat1	4.11782421966015e-64	0.694674	0.847	0.66	1.00199016736991e-59
Atp5a1	4.64533950020435e-64	-0.795163	0.808	0.788	1.13035046058473e-59
Gm40578	4.73660112598014e-64	-3.37236	0.015	0.137	1.15255715198475e-59
Rpl38	4.99874725430513e-64	-0.584089	0.919	0.858	1.21634516939007e-59
Crip2	5.22942153382564e-64	-1.28541	0.554	0.701	1.27247514182579e-59
Ndufb11	6.08139730979013e-64	-1.06308	0.541	0.71	1.47978640739123e-59
Slco4c1	6.48771741664377e-64	-3.8877	0.009	0.116	1.57865627899193e-59
H2-T23	7.5048734009546e-64	1.33716	0.411	0.125	1.82616084465428e-59
Efhd2	8.32292015505365e-64	0.526823	0.762	0.557	2.0252161613292e-59
Serping1	8.83488176057356e-64	1.32425	0.469	0.188	2.14979177880036e-59
Dst	9.65167688786867e-64	-1.34615	0.599	0.715	2.34854253712508e-59
Bcas3	1.06101447421098e-63	0.631255	0.883	0.677	2.58176652009757e-59
Btbd9	1.12636487949111e-63	0.487646	0.984	0.89	2.74078366126572e-59
Gpc6	1.16188336425325e-63	-1.78382	0.07	0.262	2.82721079023744e-59
Anp32b	1.18615083096104e-63	-0.831719	0.848	0.812	2.8862608169775e-59
Cmtm7	1.29174997413901e-63	-1.73731	0.153	0.39	3.14321521207246e-59
Slc25a4	1.32175507806093e-63	-1.26383	0.416	0.635	3.21622663144567e-59
Gpcpd1	1.47425325463096e-63	0.716466	0.976	0.858	3.58730044449351e-59
Rps29	1.49812129837521e-63	-0.662864	0.881	0.84	3.64537855533641e-59
Tet1	1.86113928277347e-63	-4.18266	0.008	0.114	4.52871021677267e-59
Atp5pb	1.98491858602753e-63	-0.838442	0.748	0.788	4.82990239538079e-59
Racgap1	2.02695263371373e-63	-4.70948	0.013	0.128	4.93218384361562e-59
Ssh1	2.37509204513683e-63	0.917193	0.651	0.409	5.77931147343145e-59
Wdr72	2.59474049943315e-63	1.32176	0.42	0.132	6.31378205727068e-59
Cox6c	2.60194799186328e-63	-0.86969	0.705	0.776	6.33132004860093e-59
Gja3	2.66539639272534e-63	-2.97387	0.024	0.159	6.48570904241856e-59
Nhsl2	2.79251087095181e-63	-1.64615	0.163	0.403	6.79501670228703e-59
Lrrc20	3.39696747604746e-63	1.56485	0.381	0.1	8.26584095946628e-59
Tet2	3.72211197083202e-63	0.572225	0.835	0.624	9.05701505862556e-59
Aspm	3.84312252458501e-63	-5.63713	0.006	0.104	9.3514700390727e-59
Klhdc2	4.22216470125564e-63	-1.75434	0.135	0.36	1.02737933675654e-58
Wdr77	4.49535786455354e-63	-1.33761	0.309	0.558	1.09385542918181e-58
Bcl2l11	5.48868231495605e-63	1.14402	0.602	0.326	1.33556106769825e-58
Large1	5.68063194015663e-63	0.864	0.836	0.61	1.38226816999831e-58
Fbln1	5.7867341314641e-63	0.7355	0.788	0.585	1.40808601620916e-58
Phb2	6.20277799008097e-63	-1.23071	0.508	0.677	1.5093219683264e-58
Tnik	7.12787121680644e-63	0.805659	0.87	0.664	1.73442490318551e-58
Lyar	7.49247094198567e-63	-1.50648	0.339	0.568	1.82314295431337e-58
Sash1	8.7966444540322e-63	0.751975	0.794	0.562	2.14048749499965e-58
Mycbp2	9.57854085788367e-63	-0.788789	0.941	0.853	2.33074634694883e-58
Caprin2	1.23194698927748e-62	-2.94719	0.056	0.227	2.9976966090089e-58
Arl15	1.31796884096871e-62	0.688829	0.975	0.876	3.20701358072916e-58
Gbp3	1.51513513919977e-62	1.69086	0.396	0.117	3.6867783342148e-58
Ddx21	1.60989652140884e-62	-1.06879	0.62	0.75	3.91736120554413e-58
Rims1	1.81325940556377e-62	-3.95071	0.007	0.107	4.41220411155832e-58
Susd6	1.86834006556087e-62	0.673639	0.789	0.566	4.54623188152927e-58
Tpbg	1.88887520727165e-62	-1.61143	0.249	0.491	4.5962000418541e-58
Nrep	2.04833174990288e-62	-1.7903	0.196	0.433	4.98420564703868e-58
Tceal9	2.05214976266982e-62	-1.37693	0.431	0.637	4.99349601750446e-58
Ccdc88c	2.07551995788948e-62	-1.17059	0.455	0.672	5.05036271353248e-58
Vdac1	2.08168443814828e-62	-0.889921	0.748	0.763	5.06536274334621e-58
Srgap1	2.57287513268439e-62	0.738863	0.851	0.66	6.26057706036092e-58
Dennd4c	2.60364732833716e-62	0.530453	0.914	0.755	6.33545504404282e-58
Mindy2	2.8905005862803e-62	0.85156	0.661	0.406	7.03345507659584e-58
Cct8	3.02814502950549e-62	-0.911533	0.757	0.764	7.36838530029572e-58
Cntln	3.0322778559236e-62	-3.05593	0.029	0.172	7.37844170681889e-58
Zwilch	3.2374858947206e-62	-3.5126	0.021	0.149	7.87777442762364e-58
Cdkn1a	3.49182600536778e-62	1.24274	0.57	0.295	8.49666021886143e-58
Acp5	3.9419598135522e-62	0.795421	0.478	0.19	9.59197081431656e-58
Ppp1r14b	4.17723542880143e-62	-0.926669	0.716	0.775	1.01644669689025e-57
Fignl1	4.7488875269228e-62	-3.53777	0.011	0.121	1.15554680192613e-57
Slc22a23	5.12560415022367e-62	1.0134	0.669	0.401	1.24721325787392e-57
Slk	5.2268979776826e-62	0.497207	0.973	0.838	1.27186108490951e-57
Gna14	5.94072921742453e-62	1.78844	0.298	0.041	1.44555764047591e-57
Aldoa	6.0773578152604e-62	0.53252	0.868	0.765	1.47880347718731e-57
Cdh1	6.60206433942548e-62	0.603715	0.983	0.883	1.6064803157124e-57
Galnt3	6.67911102322115e-62	0.574646	0.88	0.702	1.6252280852804e-57
Csf1	7.61056914240645e-62	1.45503	0.358	0.083	1.85187978942176e-57
Ube2e2	8.30429350377767e-62	0.728415	0.887	0.678	2.02068373827422e-57
Pgm2	8.44925405907347e-62	0.973321	0.664	0.426	2.05595699019435e-57
Nmnat3	8.98122994778379e-62	1.15725	0.488	0.201	2.18540268319423e-57
Tpx2	9.09947097557614e-62	-4.69954	0.022	0.15	2.21417427248694e-57
Atp5md	9.50304877968982e-62	-1.07052	0.582	0.714	2.31237685956192e-57
Mcoln2	1.00129634899437e-61	-4.65925	0.003	0.091	2.436454406008e-57
Ankrd6	1.01986296811436e-61	-1.56375	0.198	0.442	2.48163256031267e-57
Rnf7	1.20671018380785e-61	-1.14932	0.58	0.698	2.93628789025965e-57
Cast	1.24157440091736e-61	0.649848	0.848	0.664	3.0211229897522e-57
Galc	1.29434447205547e-61	0.486957	0.542	0.246	3.14952840385257e-57
Park7	1.47944578702416e-61	-1.08469	0.576	0.705	3.59993543356589e-57
Chst8	1.59723216699383e-61	0.934402	0.622	0.313	3.88654503194609e-57
Decr1	1.61525810870868e-61	-2.01199	0.101	0.304	3.93040755592083e-57
Lif	1.74875573551252e-61	2.45583	0.369	0.1	4.25524733122262e-57
Gm47754	1.76010271999251e-61	1.95831	0.415	0.125	4.28285794855777e-57
Kif13b	1.83090361466283e-61	0.621906	0.899	0.731	4.45513776555906e-57
Pmaip1	1.91125711842498e-61	1.19211	0.616	0.353	4.6506619462635e-57
Cebpd	2.51585785546918e-61	0.802274	0.641	0.37	6.12183691971317e-57
Chaf1a	2.62918373053871e-61	-3.05142	0.038	0.188	6.39759277151985e-57
Rangrf	2.91328585547492e-61	-2.46627	0.054	0.221	7.08889847212711e-57
Exosc7	3.09901951128447e-61	-1.3566	0.389	0.609	7.54084417680851e-57
Nde1	3.30452854854666e-61	-1.9557	0.082	0.274	8.04090931717859e-57
Nolc1	3.56375577158088e-61	-1.14031	0.529	0.702	8.67168691898776e-57
H2ax	3.58653411555597e-61	-2.13235	0.218	0.443	8.72711346338233e-57
Efhb	3.81484110803538e-61	0.761927	0.659	0.375	9.28265286818249e-57
Adam28	4.75474841223621e-61	1.26415	0.576	0.296	1.15697293114944e-56
Dpy30	5.18815290481545e-61	-1.34289	0.399	0.605	1.26243324632874e-56
Tapbp	5.38266358693809e-61	0.705875	0.78	0.61	1.30976353060965e-56
Srgn	5.67431710878017e-61	1.32826	0.332	0.061	1.38073158207948e-56
Pde4d	5.70656046562007e-61	0.6404	0.983	0.903	1.38857735809933e-56
Dlgap5	6.00502815344939e-61	-4.26233	0.013	0.125	1.46120350057884e-56
Frmd4a	6.11149768593485e-61	-1.64095	0.235	0.474	1.48711073191853e-56
Prickle2	6.16540422371103e-61	1.2943	0.357	0.082	1.50022780975561e-56
Abhd14a	6.8788243226972e-61	-2.79493	0.03	0.17	1.67382432244191e-56
Tspan12	8.01770703359471e-61	1.47488	0.353	0.08	1.9509486524846e-56
H6pd	8.74251917497375e-61	1.14022	0.519	0.234	2.12731719084636e-56
Zfp423	9.30986442622332e-61	2.44217	0.298	0.046	2.26536931083292e-56
Dmtn	9.61744940502342e-61	-2.99033	0.018	0.14	2.34021396372435e-56
Tomm20	1.01354343958673e-60	-1.07495	0.619	0.711	2.46625525154639e-56
Trim47	1.07985817939393e-60	-2.18404	0.06	0.234	2.62761890791925e-56
Xrcc5	1.15391084866216e-60	-1.31205	0.32	0.563	2.80781126804964e-56
Rere	1.18547828778369e-60	0.472265	0.986	0.904	2.88462431766405e-56
Wfdc18	1.24649352672651e-60	1.74561	0.294	0.038	3.03309269858362e-56
Usp3	1.2952379824357e-60	0.450783	0.93	0.791	3.1517025826608e-56
Scamp5	1.33348531100222e-60	1.45307	0.409	0.14	3.2447698072617e-56
Fbxl20	1.34418346632867e-60	0.782428	0.76	0.527	3.27080162861755e-56
Stim2	1.43285578267796e-60	0.565134	0.891	0.709	3.48656797599029e-56
Nabp1	1.62440673145612e-60	0.940351	0.422	0.134	3.95266889965218e-56
Map7	1.76037727164254e-60	0.501553	0.95	0.795	4.2835260150878e-56
Spc24	2.10165245345641e-60	-3.55504	0.033	0.175	5.11395091499548e-56
Pde4b	2.26836559376049e-60	1.32871	0.359	0.084	5.51961399929741e-56
Ttc28	2.79029453239e-60	-3.95159	0.008	0.108	6.78962368566458e-56
Ncald	2.80628867767172e-60	-1.4298	0.282	0.538	6.82854223937859e-56
Lage3	2.85564027971901e-60	-1.4891	0.236	0.474	6.94862949264028e-56
Spag9	2.85920930894946e-60	0.561323	0.925	0.79	6.95731401146673e-56
Srp14	3.96036453830918e-60	-1.12572	0.56	0.693	9.63675503106773e-56
2810001G20Rik	4.31978628694008e-60	-1.95185	0.095	0.292	1.05113359720113e-55
Cd14	4.91154375780018e-60	1.01422	0.707	0.501	1.19512594258552e-55
Atp6v0a2	6.0629145577834e-60	0.839693	0.761	0.545	1.47528899934544e-55
Rhoc	8.37126100369698e-60	0.647724	0.724	0.499	2.03697894002959e-55
Exoc6b	8.60549621712551e-60	0.444192	0.959	0.833	2.09397539451315e-55
Eef1d	9.65824641327036e-60	-0.985153	0.664	0.74	2.35014109974108e-55
Fgf18	9.74829697725295e-60	-1.54934	0.124	0.342	2.37205310347496e-55
Abca3	1.0012343125727e-59	0.811018	0.705	0.461	2.43630345278315e-55
Prdx6	1.14988988180874e-59	-1.0669	0.609	0.718	2.79802704940521e-55
Plcxd3	1.18597729960806e-59	2.51041	0.374	0.109	2.88583856313628e-55
Glipr2	1.2738598691498e-59	1.66104	0.354	0.09	3.0996832196022e-55
Tspan1	1.41176616799535e-59	0.642678	0.867	0.749	3.43525061658308e-55
Sfpq	1.44773402789182e-59	-0.563556	0.944	0.868	3.52277121006916e-55
Cisd1	1.91962710701444e-59	-1.56169	0.272	0.504	4.67102863949824e-55
Hadh	2.13606561879606e-59	-1.52172	0.286	0.517	5.19768847021645e-55
Atp2b1	2.26119404652728e-59	0.602558	0.989	0.906	5.50216347341483e-55
Gpatch4	2.28633074257746e-59	-1.48524	0.256	0.508	5.56332859591373e-55
Tanc2	2.37194901546387e-59	1.4208	0.498	0.218	5.77166353932823e-55
Ruvbl1	2.5876659232121e-59	-1.28627	0.427	0.626	6.296567490952e-55
Hddc2	3.0792519006114e-59	-1.17416	0.536	0.692	7.49274364975772e-55
Chil1	3.49397956583083e-59	1.84718	0.28	0.033	8.50190047753617e-55
Itgb6	3.65093287772669e-59	0.992192	0.826	0.641	8.88381497137237e-55
Tfcp2l1	3.68673813267608e-59	-1.14172	0.743	0.781	8.9709398982407e-55
Ckap2	3.75883369914787e-59	-4.74354	0.006	0.1	9.14637004013651e-55
Vps37b	4.29892714294676e-59	1.1334	0.613	0.363	1.04605794169323e-54
Sprr2d	5.39144422726435e-59	1.2046	0.391	0.109	1.31190012382023e-54
Morf4l1	7.58891379401009e-59	-0.533038	0.921	0.865	1.84661039349648e-54
Dhcr7	7.95577615727092e-59	-1.93757	0.082	0.27	1.93587901234873e-54
Bzw1	8.37074947938023e-59	-0.772198	0.823	0.795	2.03685447081759e-54
Arhgdib	8.55762880613274e-59	-2.20458	0.075	0.256	2.08232781739628e-54
Hnrnpk	8.84693316505461e-59	-0.547106	0.919	0.843	2.15272424705274e-54
Nifk	1.09582875914602e-58	-1.29499	0.373	0.594	2.66648011963002e-54
Rnf213	1.50754278580743e-58	0.699344	0.895	0.757	3.66830386070523e-54
Tmco4	1.60211958786753e-58	0.84663	0.62	0.347	3.89843759315806e-54
Tacc1	1.6852940983221e-58	-1.48005	0.439	0.633	4.10082612944717e-54
Ppp1ca	1.68687485645001e-58	-0.993722	0.672	0.741	4.10467258819981e-54
Arl3	1.76307556159901e-58	-1.5994	0.185	0.417	4.29009176403887e-54
Slc2a1	1.78845358761256e-58	0.954812	0.624	0.349	4.35184411473764e-54
Gcat	1.93761724860132e-58	-2.50982	0.038	0.186	4.71480405102158e-54
Atp1a1	2.20421536680417e-58	-0.705022	0.888	0.852	5.36351725204458e-54
Uqcr10	2.45416097446922e-58	-1.0627	0.541	0.697	5.97170989917595e-54
Dok7	2.65804208392161e-58	-3.58039	0.01	0.112	6.46781380280644e-54
Cenpk	2.87296319915606e-58	-3.26358	0.02	0.14	6.99078135250644e-54
Dctpp1	3.02708309640798e-58	-1.7844	0.207	0.427	7.36580129848954e-54
Eif3e	3.28487296216547e-58	-0.86935	0.758	0.765	7.99308137883725e-54
Gart	3.65831607468249e-58	-1.27701	0.357	0.583	8.9017805045249e-54
Tgfbr1	4.12344205751257e-58	0.77278	0.849	0.652	1.00335715585453e-53
Rrbp1	4.30070120949482e-58	0.368549	0.988	0.927	1.04648962530638e-53
Rrp15	4.32062447775433e-58	-1.48558	0.26	0.501	1.05133755417196e-53
Fbxo34	4.46865651337818e-58	0.695247	0.743	0.526	1.08735818940031e-53
Cxadr	4.60171565416759e-58	0.544407	0.852	0.668	1.1197354701286e-53
Itpr3	4.87688536072734e-58	0.568903	0.797	0.59	1.18669251482578e-53
Efna5	6.08775121350887e-58	0.75583	0.928	0.785	1.48133250278311e-53
Lypd8l	6.33992185536555e-58	2.27443	0.318	0.067	1.5426931850661e-53
Gk	6.69940089526226e-58	1.79141	0.373	0.109	1.63016521984417e-53
Cttnbp2	6.80137516184223e-58	0.760312	0.676	0.429	1.65497861813107e-53
Sdcbp	6.81814745276526e-58	0.404116	0.931	0.812	1.65905981968137e-53
Tpk1	7.32660391454921e-58	0.670067	0.653	0.373	1.78278253052726e-53
Gclc	8.26707690379562e-58	-1.44787	0.397	0.614	2.01162782300059e-53
Tle5	9.3932177252378e-58	-1.11802	0.62	0.711	2.28565166908211e-53
Btbd8	1.08205287637242e-57	1.02899	0.5	0.229	2.63295926407701e-53
Etfb	1.08914169927078e-57	-1.17164	0.494	0.665	2.6502084968356e-53
Galnt6	1.13092109887681e-57	1.19835	0.321	0.065	2.75187030989695e-53
Sptssa	1.63146749398827e-57	-1.2316	0.406	0.608	3.96984985312167e-53
Prdx1	1.74120651868308e-57	-0.701436	0.843	0.825	4.23687782191154e-53
Atg10	2.037568609201e-57	0.888286	0.619	0.352	4.9580156967688e-53
Srsf10	2.28915933487063e-57	-0.891701	0.781	0.779	5.5702114095407e-53
Snrpd2	2.68475742066371e-57	-0.981195	0.656	0.737	6.532820231701e-53
Tubb4b	2.80170441756627e-57	-1.50495	0.436	0.624	6.81738735926401e-53
Baiap2l1	3.08117253125411e-57	0.769797	0.849	0.646	7.49741712030061e-53
Snrpb	3.82986586291084e-57	-1.05984	0.598	0.699	9.31921260422096e-53
Fam171a1	3.93277465779711e-57	0.58833	0.812	0.598	9.5696205748177e-53
Tuba1a	4.02826117166945e-57	-3.00778	0.026	0.155	9.80196790902328e-53
Slco4a1	5.11662714307182e-57	0.951494	0.342	0.081	1.24502888272367e-52
Rpl10	5.86635641760704e-57	-0.589991	0.872	0.837	1.42746050709632e-52
Rps27l	6.05935162516538e-57	-0.873365	0.676	0.753	1.47442203095149e-52
Nexmif	6.30558673479919e-57	1.07421	0.627	0.35	1.53433842017869e-52
Rsl1d1	6.74993268786357e-57	-0.965667	0.658	0.736	1.64246112093784e-52
Mdn1	7.0974404711644e-57	-1.05018	0.564	0.713	1.72702018984843e-52
Ica1	7.7611966440086e-57	-1.22605	0.324	0.564	1.88853197938661e-52
AI506816	8.27918106771993e-57	-1.39558	0.229	0.464	2.01457312920829e-52
Shmt1	1.00532279993355e-56	-1.47416	0.259	0.49	2.44625196907831e-52
Tk1	1.06882386057433e-56	-4.44123	0.01	0.111	2.60076909993553e-52
Serinc2	1.21935998876047e-56	0.741525	0.707	0.477	2.96706866065085e-52
Npepps	1.95297358955022e-56	0.604083	0.964	0.82	4.75217063545255e-52
Plekhm3	2.21385766124057e-56	1.30767	0.555	0.296	5.38697984709669e-52
Fbxl5	2.32919824039411e-56	0.503349	0.877	0.688	5.66763807835098e-52
Il17rd	2.9054307032376e-56	1.86543	0.302	0.055	7.06978453018806e-52
Ticrr	3.25066929324051e-56	-4.70402	0.003	0.085	7.90985359124214e-52
Nudcd2	3.2799043741273e-56	-1.35301	0.323	0.549	7.98099131356396e-52
Gm43057	3.45024512166531e-56	1.15452	0.475	0.194	8.3954814545482e-52
Cldn4	3.47798042418231e-56	1.22078	0.626	0.384	8.46296976616281e-52
Tmprss11g	3.49752241269079e-56	1.5746	0.309	0.062	8.5105212868005e-52
Paqr8	3.69744982382258e-56	1.22778	0.542	0.286	8.99700465630749e-52
Mkrn2os	3.83119034361028e-56	1.34021	0.393	0.12	9.32243546310688e-52
Ndfip2	4.03676447023654e-56	0.71202	0.807	0.618	9.82265898542657e-52
Klhl14	4.07886004135038e-56	-4.49935	0.007	0.1	9.92509013861789e-52
Exo1	4.10202313508075e-56	-4.05072	0.011	0.114	9.98145289459199e-52
Srm	4.35048445741776e-56	-1.83703	0.115	0.314	1.05860338302346e-51
Cd63	4.54096847622123e-56	-0.973138	0.688	0.746	1.10495385931891e-51
Pfdn2	4.75329233680206e-56	-0.949826	0.703	0.741	1.15661862431405e-51
Cenpw	5.24261845645145e-56	-3.18496	0.031	0.163	1.27568634900833e-51
Zfp217	5.34675343045038e-56	0.629586	0.659	0.395	1.30102551223149e-51
Rab11fip4	5.39365515616982e-56	-1.99261	0.072	0.248	1.3124381091508e-51
Setx	5.49036965448872e-56	-0.980004	0.76	0.799	1.33597164802674e-51
Arhgap29	5.6209218775187e-56	0.627615	0.875	0.716	1.36773892045663e-51
Hivep3	6.04384202597789e-56	0.844922	0.808	0.636	1.4706480801812e-51
Tmod3	6.26302944506149e-56	-0.660154	0.922	0.84	1.52398295486681e-51
Tiparp	6.44735039907595e-56	1.09935	0.75	0.526	1.56883377260715e-51
Srsf1	6.5070454955964e-56	-0.897734	0.743	0.78	1.58335938044347e-51
Cers6	6.75962704732717e-56	0.752807	0.856	0.698	1.64482004942612e-51
Eif2ak4	7.94558276581733e-56	-1.48781	0.261	0.496	1.93339865440633e-51
Clint1	8.99836344031058e-56	0.301745	0.997	0.947	2.18957177593077e-51
Tsen34	9.1770712476602e-56	-1.2718	0.441	0.626	2.23305674669316e-51
Ect2	1.38131800515743e-55	-3.60167	0.028	0.157	3.36116110194957e-51
Cst3	1.45078032043572e-55	0.780384	0.741	0.589	3.53018375371624e-51
Jakmip1	1.77885836226333e-55	-1.77761	0.097	0.289	4.32849605289537e-51
Rrm2	2.14840808083698e-55	-4.73047	0.014	0.121	5.22772138310063e-51
Elf3	2.21219035579528e-55	0.476089	0.972	0.886	5.38292279275665e-51
Il6ra	2.60459473661228e-55	1.14873	0.377	0.114	6.33776037259867e-51
Cyp21a1	2.68450695048764e-55	1.57725	0.316	0.068	6.53221076262157e-51
Alkbh8	2.86724129465985e-55	-1.39749	0.342	0.567	6.97685824229582e-51
Crip1	2.92111466826129e-55	-0.806274	0.765	0.811	7.10794832228021e-51
Eif3k	3.04462721287227e-55	-0.927125	0.67	0.735	7.40849139708208e-51
Hdac1	3.13782124885534e-55	-1.00038	0.591	0.71	7.6352604448397e-51
Mrpl57	3.42688893875033e-55	-1.30686	0.327	0.561	8.33864885466118e-51
Pus7	3.46169801732492e-55	-1.19723	0.28	0.521	8.42334978555674e-51
Ebna1bp2	3.58283146594369e-55	-1.08622	0.49	0.662	8.71810380608077e-51
Prkaa1	3.69695450277959e-55	0.633811	0.768	0.567	8.99579939161357e-51
Wwtr1	3.92118731113072e-55	0.819601	0.778	0.585	9.54142508417439e-51
Cert1	3.95496724137663e-55	0.528725	0.862	0.661	9.62362178844175e-51
Blnk	4.03017620159839e-55	0.755516	0.8	0.588	9.80662775134935e-51
Noxa1	4.79707583386793e-55	1.01802	0.402	0.138	1.16727246265508e-50
Rigi	4.84895037034018e-55	0.657106	0.698	0.445	1.17989509361488e-50
Zswim6	4.86774522382875e-55	0.497965	0.939	0.764	1.18446844531425e-50
Oas3	5.30938591140906e-55	1.02306	0.347	0.09	1.29193287382317e-50
Pik3r1	5.3187180630651e-55	-0.996358	0.669	0.752	1.29420366628563e-50
Zfp651	5.39782921302641e-55	-2.91745	0.02	0.137	1.31345378240572e-50
Tomm5	5.90891425487954e-55	-1.14859	0.457	0.645	1.43781610563984e-50
Rassf9	6.96730838354401e-55	-1.69766	0.1	0.292	1.69535514896776e-50
Tomm7	7.62856553388259e-55	-0.984722	0.616	0.739	1.85625885135965e-50
Plekhg3	7.75069754460176e-55	0.562191	0.895	0.731	1.88597723352795e-50
Mrto4	8.68633863403724e-55	-1.40787	0.241	0.468	2.11364677982028e-50
Pcp4l1	8.87764455858791e-55	1.59805	0.329	0.077	2.1601972504412e-50
Trim12c	9.16887141272467e-55	0.625502	0.585	0.321	2.23106148085829e-50
Slc25a13	9.81289837788845e-55	0.611941	0.924	0.812	2.3877725622916e-50
Tnfrsf1b	9.90210733003533e-55	1.09943	0.489	0.218	2.4094797766175e-50
Ndufb8	1.09260690827447e-54	-1.19757	0.521	0.671	2.65864038990428e-50
Slc12a2	1.1319938626716e-54	0.71132	0.859	0.705	2.75448066603881e-50
Rpa1	1.19012403097562e-54	-2.14613	0.105	0.295	2.89592880457297e-50
Rfc4	1.45863538749666e-54	-2.70932	0.063	0.223	3.54929748839563e-50
Rad54b	1.48014768490351e-54	-4.5091	0.006	0.095	3.6016433616757e-50
Slc44a4	2.02249435455356e-54	0.677564	0.732	0.533	4.92133551293519e-50
Arl2bp	2.04154101122502e-54	-1.26861	0.365	0.574	4.96768174261385e-50
Phactr1	2.05141246793433e-54	1.32039	0.552	0.296	4.99170195822461e-50
Magohb	2.12540665478912e-54	-1.55571	0.146	0.357	5.17175201309837e-50
Spry1	2.14927687198043e-54	-1.94085	0.081	0.259	5.22983541258999e-50
Hells	2.3425608924009e-54	-2.90337	0.129	0.32	5.7001534194791e-50
Hoxb6	2.45676417365432e-54	0.444934	0.878	0.692	5.97804426375306e-50
Chek1	2.52469582217849e-54	-3.36844	0.019	0.132	6.14334234410691e-50
Foxo3	2.64672228568275e-54	0.609979	0.803	0.591	6.44026933775184e-50
Cdc20	2.82045430408037e-54	-5.14075	0.008	0.101	6.86301145811877e-50
Polr2e	2.83936476116816e-54	-1.24013	0.376	0.584	6.90902627335049e-50
C130074G19Rik	3.84984796878088e-54	2.08129	0.277	0.045	9.36783506243451e-50
Fjx1	4.19002757805119e-54	-2.27695	0.056	0.213	1.0195594105672e-49
Cdh4	4.43254727296322e-54	-1.53573	0.348	0.576	1.07857172793014e-49
Leng1	4.79047403256445e-54	0.808824	0.548	0.293	1.16566604634391e-49
Asap1	4.93966808079444e-54	0.715648	0.931	0.791	1.20196943409971e-49
Ube2h	5.19965829343824e-54	0.543471	0.945	0.809	1.26523285254233e-49
Atp5c1	7.27865531877969e-54	-0.813293	0.74	0.772	1.77111519871866e-49
Rbbp4	7.41436104215677e-54	-0.978871	0.749	0.754	1.80413647238801e-49
Trpm4	7.7731818359818e-54	0.621139	0.576	0.312	1.89144833614945e-49
Atf3	8.11855295629723e-54	1.2546	0.486	0.198	1.97548749085581e-49
Arhgap28	9.4194066799572e-54	1.07262	0.358	0.107	2.29202422743399e-49
Rrs1	9.71925802572619e-54	-1.12961	0.489	0.667	2.36498705539995e-49
Bcat1	1.06199396322028e-53	-0.799585	0.806	0.846	2.58414991070391e-49
Sp100	1.0835444241367e-53	0.633209	0.795	0.59	2.63658864725184e-49
H1f5	1.12778784661041e-53	-5.30415	0.016	0.123	2.74424616715712e-49
Cdc14b	1.13215091726711e-53	-1.34596	0.28	0.518	2.75486282698607e-49
Itpripl1	1.21252861792554e-53	-1.9822	0.074	0.246	2.95044588599821e-49
Plk1	1.41245512173728e-53	-5.46725	0.005	0.087	3.43692704772333e-49
Plekhb2	1.61666530931572e-53	0.651029	0.732	0.52	3.93383169715795e-49
A630023A22Rik	1.81429901341611e-53	1.038	0.387	0.122	4.41473378934542e-49
Rala	1.83350545749643e-53	0.423762	0.897	0.749	4.46146882972607e-49
Wdr83os	1.89322719058961e-53	-1.22578	0.37	0.581	4.60678972286169e-49
Magi3	1.8940209222031e-53	0.58528	0.912	0.757	4.60872110999681e-49
Trim24	2.01964606993585e-53	-1.20965	0.548	0.689	4.9144047819749e-49
Dclk1	2.35099905604123e-53	-4.21581	0.004	0.086	5.72068600306513e-49
Kif15	2.7057222728685e-53	-3.61968	0.034	0.167	6.58383400657093e-49
Vtcn1	2.733898544226e-53	0.764527	0.903	0.76	6.65239532766512e-49
Ocln	2.8103186225574e-53	0.686133	0.809	0.614	6.83834830426891e-49
Cryl1	2.89958104463714e-53	-1.21736	0.318	0.553	7.05555055591556e-49
Vdac2	3.12103180924591e-53	-0.804901	0.759	0.77	7.59440670143808e-49
Cct3	3.97323237019673e-53	-0.813658	0.725	0.766	9.6680663263997e-49
Sik2	4.09033521198534e-53	0.822704	0.749	0.517	9.95301267132392e-49
Ccnb1	4.27155451640467e-53	-5.12172	0.003	0.082	1.03939736047675e-48
Acat1	4.38697473412809e-53	-1.24523	0.364	0.58	1.06748256205539e-48
Nampt	4.64563477473982e-53	0.708267	0.667	0.42	1.13042230973744e-48
Cpxm1	5.50838253992615e-53	-7.28478	0	0.066	1.34035472344023e-48
Fpgs	5.53281541491311e-53	-1.80219	0.081	0.257	1.34629997491081e-48
Mettl26	6.48154690879796e-53	-1.3643	0.254	0.481	1.57715480931781e-48
Me1	6.77089839022873e-53	0.921806	0.493	0.217	1.64756270529436e-48
Ssb	6.78467598651683e-53	-0.708015	0.828	0.806	1.65091520779914e-48
Micall2	8.12869233418464e-53	1.14507	0.506	0.268	1.97795470567715e-48
Ptk2b	9.08897455440061e-53	-1.50149	0.553	0.671	2.2116201783223e-48
Eif3m	9.22148559780733e-53	-0.9627	0.657	0.722	2.24386409051446e-48
Map3k5	9.7523112362776e-53	0.584663	0.907	0.754	2.37302989312343e-48
Rdh12	1.22928266093584e-52	-4.75165	0.005	0.088	2.99121349885517e-48
Mid1ip1	1.33139671871891e-52	-1.41968	0.243	0.468	3.23968763565873e-48
Nop16	1.38481391437153e-52	-1.38205	0.326	0.546	3.36966769784026e-48
Mrpl41	1.43721155853129e-52	-1.48626	0.217	0.437	3.49716688537419e-48
Hecw2	1.59212574111115e-52	-3.56318	0.009	0.103	3.87411956584576e-48
Fam184b	1.59687236591812e-52	1.20757	0.456	0.19	3.88566952798857e-48
Pmp22	1.60229215378837e-52	-2.55898	0.043	0.184	3.89885749781324e-48
Pabpc1	1.71601181267242e-52	-0.387493	0.962	0.894	4.1755715437758e-48
Lpp	1.84042144297022e-52	0.364283	0.994	0.933	4.47829749717943e-48
Vcp	1.89168518984123e-52	-0.738095	0.803	0.802	4.60303757244066e-48
Ly96	2.31073992624799e-52	1.06459	0.471	0.222	5.62272346253923e-48
Vcl	2.42703426765855e-52	0.169092	0.931	0.757	5.90570248349355e-48
Prss32	2.54548942419596e-52	2.07545	0.249	0.029	6.19393941589602e-48
Psmg2	2.91714975617281e-52	-1.46515	0.216	0.437	7.09830050169531e-48
Grin2b	3.28368837325658e-52	-7.8291	0	0.065	7.99019891864524e-48
Rictor	3.38987588837719e-52	0.640975	0.931	0.794	8.24858499918822e-48
Trim40	3.47899187020559e-52	1.55875	0.248	0.028	8.46543091777126e-48
Ddr1	3.59098745714407e-52	0.598659	0.796	0.608	8.73794977946867e-48
Fanca	3.83283455282559e-52	-2.62104	0.031	0.159	9.32643631739051e-48
Cited1	3.85882464281444e-52	3.58834	0.225	0.017	9.38967800336038e-48
Nwd1	5.50761636386681e-52	-4.92301	0.001	0.072	1.34016828981971e-47
Itpk1	5.64752798957261e-52	1.11901	0.727	0.539	1.3742129857027e-47
Timm8a1	6.45519950288867e-52	-1.61918	0.208	0.421	1.5707436950379e-47
Tgfbrap1	6.94592281521081e-52	-1.77643	0.203	0.416	1.69015139862525e-47
Pfkp	7.20584114154622e-52	0.973691	0.397	0.142	1.75339732497244e-47
Asf1b	7.24750301387415e-52	-4.54957	0.005	0.087	1.763534908366e-47
Polq	7.96347387486449e-52	-4.8253	0.005	0.087	1.93775209797078e-47
Fermt2	1.03958013081712e-51	-2.25326	0.03	0.157	2.5296103323173e-47
Rasd1	1.13364859467289e-51	-0.987001	0.339	0.581	2.75850712541755e-47
N4bp1	1.17880526121854e-51	0.659208	0.784	0.596	2.86838684212308e-47
Cct7	1.18777249471244e-51	-0.98728	0.62	0.719	2.89020681138378e-47
Cd24a	1.39003903215436e-51	-0.465221	0.952	0.901	3.38238197694121e-47
Nup93	1.39352717941932e-51	-1.3869	0.249	0.478	3.39086968568103e-47
Slc50a1	1.56650417035289e-51	-1.46429	0.177	0.391	3.81177459771968e-47
Isg15	1.68568371824981e-51	0.950714	0.557	0.264	4.10177419161725e-47
mt-Cytb	1.79814589558484e-51	-0.484793	0.989	0.932	4.37542840772659e-47
Fgf16	1.9921132190195e-51	-3.21411	0.006	0.089	4.84740909584016e-47
Eif2s1	1.99533551795745e-51	-0.967839	0.636	0.724	4.85524991584587e-47
Rpl36al	2.00763294363487e-51	-0.694927	0.796	0.814	4.88517324174674e-47
Tbc1d9	2.05451048594741e-51	1.05937	0.425	0.165	4.99924036545583e-47
Pof1b	2.55429463806246e-51	1.01226	0.462	0.204	6.21536514279737e-47
2410006H16Rik	2.5754119673654e-51	-1.22186	0.514	0.667	6.26674994019023e-47
Nudc	2.76060901650244e-51	-1.20133	0.593	0.7	6.7173899198554e-47
Ripk2	3.24501732515158e-51	0.645779	0.506	0.248	7.89610065729134e-47
Cenpp	3.48445155651516e-51	-3.21481	0.04	0.176	8.47871597246834e-47
Kif14	3.60539128569216e-51	-6.8256	0.001	0.068	8.77299861547473e-47
Sf3b6	3.75057508972827e-51	-0.950199	0.623	0.716	9.12627436583581e-47
Sox7	3.91816123539617e-51	0.152818	0.681	0.445	9.53406173408949e-47
E2f1	3.97444908224574e-51	-4.47591	0.005	0.084	9.67102695182857e-47
Smurf1	4.17929735041523e-51	0.71928	0.819	0.622	1.01694842427654e-46
Ltbp4	4.44301898666597e-51	-2.44221	0.042	0.182	1.08111981002543e-46
Kcnb2	4.80124709147364e-51	-2.78338	0.024	0.142	1.16828745476828e-46
Ptpn12	5.0549134997982e-51	0.55632	0.867	0.675	1.2300121019059e-46
Mettl1	5.09700475721141e-51	-1.37693	0.236	0.457	1.24025416757225e-46
Hnrnpa0	5.902734733041e-51	-0.649331	0.837	0.801	1.43631244259087e-46
Gm44167	6.72701263774351e-51	-2.7795	0.031	0.157	1.63688398514213e-46
Map2k4	7.07498238454826e-51	0.552685	0.922	0.773	1.72155546363213e-46
Pik3cb	7.81202546166112e-51	0.618065	0.82	0.642	1.900900155586e-46
2510002D24Rik	8.67893113408645e-51	-1.41218	0.288	0.508	2.11184431285726e-46
Sv2c	8.71929220402746e-51	-5.81579	0.001	0.069	2.121665372006e-46
Igf2bp2	9.02683563271805e-51	0.439867	0.948	0.813	2.19649991450928e-46
Scd1	9.69382960207921e-51	-3.14746	0.025	0.142	2.35879955707393e-46
Clspn	9.74829424819041e-51	-4.72395	0.009	0.099	2.37205243941217e-46
Parva	1.17051109354684e-50	-1.04646	0.682	0.74	2.84820464392751e-46
Rad18	1.21339512928913e-50	-2.99465	0.032	0.157	2.95255436809925e-46
Otud7b	1.30028172382973e-50	0.71312	0.859	0.684	3.16397551859488e-46
Smim1	1.36994528125123e-50	-2.65041	0.036	0.168	3.33348785286861e-46
Lama5	1.39034386054233e-50	0.485308	0.89	0.705	3.38312371585766e-46
Daam1	1.44757727988916e-50	0.547865	0.824	0.652	3.5223897951543e-46
Vwa5a	1.48244642762857e-50	0.783951	0.645	0.42	3.6072368923486e-46
Ppp1r14c	1.60159829328398e-50	-2.96696	0.018	0.126	3.8971691270479e-46
Stc2	1.62892238681998e-50	0.769348	0.634	0.392	3.96365684384906e-46
Bcar3	1.68292016087541e-50	0.798946	0.647	0.39	4.09504962745814e-46
Idh3a	1.72145025987918e-50	-1.25637	0.329	0.542	4.18880491736402e-46
Ttk	1.99793030100617e-50	-5.1062	0.003	0.075	4.8615638014383e-46
Hoxb5	2.04195628541759e-50	0.77831	0.525	0.278	4.96869222930662e-46
Rph3al	2.0527244669927e-50	0.74888	0.691	0.449	4.99489444553333e-46
Cntnap3	2.12231111025756e-50	1.51056	0.504	0.262	5.16421962458973e-46
Socs2	2.2332447707572e-50	0.732272	0.486	0.229	5.4341545006835e-46
Ndufb5	2.29498969758386e-50	-1.00104	0.537	0.691	5.58439843113081e-46
Banf1	2.36035770075538e-50	-1.19183	0.467	0.635	5.74345839324808e-46
Map4k4	2.36726900083605e-50	0.434857	0.934	0.799	5.76027565973436e-46
Psmb1	2.38654682354521e-50	-0.702575	0.786	0.782	5.80718438573255e-46
Sh3bp2	2.41176751742112e-50	1.15968	0.372	0.123	5.86855390014082e-46
Nectin2	2.45259468357266e-50	0.663612	0.78	0.607	5.96789864353735e-46
Sorcs2	2.68898793051833e-50	1.5313	0.295	0.064	6.54311433133024e-46
Ifi204	2.79910368053734e-50	1.52228	0.277	0.051	6.8110589858515e-46
Polr3h	2.82581131486647e-50	-1.64051	0.13	0.322	6.87604667246458e-46
Cenph	3.11926712727214e-50	-3.48509	0.021	0.132	7.59011270079129e-46
Slc49a4	3.12765065471644e-50	0.989303	0.601	0.384	7.6105123381215e-46
Nudt11	3.46925896791678e-50	-4.11525	0.006	0.087	8.44174784663189e-46
Robo1	3.56304706736247e-50	0.647966	0.915	0.815	8.66996242901309e-46
C2	4.01153279572332e-50	1.03626	0.391	0.144	9.76126275183356e-46
Trerf1	4.22299994826192e-50	-1.22946	0.358	0.586	1.02758257741057e-45
Ndufa11	4.72866067999123e-50	-0.923703	0.575	0.714	1.15062500326227e-45
Lgals9	5.3653825633487e-50	0.740668	0.604	0.339	1.30555853913964e-45
Gtf2a2	5.65623443179284e-50	-1.16346	0.506	0.654	1.37633152428815e-45
Adm	5.96015667393525e-50	1.38371	0.357	0.105	1.45028492346867e-45
Cdca3	5.98844652773499e-50	-4.06561	0.017	0.12	1.45716869359376e-45
Hpse	7.33562942829785e-50	1.34206	0.313	0.079	1.78497870878772e-45
Irs1	8.93966142420819e-50	-1.95471	0.218	0.429	2.17528781435258e-45
Spc25	9.88484540655539e-50	-2.43232	0.077	0.241	2.40527943277712e-45
Nr6a1	9.99309936579082e-50	0.536175	0.928	0.771	2.43162086867788e-45
Slc39a6	1.01745720703755e-49	1.23047	0.547	0.321	2.47577862188447e-45
Ndc1	1.03437313408064e-49	-2.02637	0.061	0.216	2.51694014715842e-45
Krt20	1.10197944767549e-49	2.32659	0.251	0.038	2.68144659002877e-45
Gcnt1	1.40920316016778e-49	0.635655	0.665	0.424	3.42901404963625e-45
Hdac2	1.40982582470094e-49	-1.10598	0.559	0.685	3.4305291792448e-45
Glg1	1.45185799316577e-49	0.404284	0.925	0.798	3.53280605477026e-45
Nuf2	1.50104249871836e-49	-5.19903	0.003	0.075	3.65248671213138e-45
Pla2g10os	1.65176569398702e-49	-6.98914	0	0.063	4.01924146317861e-45
1500011B03Rik	1.66686299822642e-49	-1.63978	0.158	0.359	4.05597773358436e-45
Rfc5	1.75657922551673e-49	-2.26123	0.055	0.202	4.27428422944986e-45
Gm26756	1.76507489169776e-49	1.5464	0.251	0.037	4.29495673396816e-45
Topaz1	1.79643925598897e-49	-4.76836	0.003	0.075	4.37127564159795e-45
Ppp1r12a	1.84694831555805e-49	0.43928	0.968	0.852	4.49417933624741e-45
Hirip3	2.03609066689692e-49	-2.11103	0.079	0.243	4.95441941976028e-45
Nipal2	2.04766737524661e-49	0.763861	0.705	0.469	4.98258902418757e-45
Col12a1	2.24436929127464e-49	-2.80589	0.079	0.241	5.46122379645857e-45
Rdh11	2.26369493738679e-49	-1.95406	0.095	0.271	5.50824889114328e-45
Tnfrsf19	2.42335338774502e-49	-1.96098	0.087	0.26	5.89674579839995e-45
Atp11a	2.45135969525564e-49	0.588955	0.908	0.761	5.96489354646554e-45
Stom	2.57476810118189e-49	1.29412	0.288	0.061	6.2651832206059e-45
Nudt14	2.7308266153417e-49	-1.44029	0.246	0.455	6.64492040311095e-45
Slc25a39	3.16210608687464e-49	-1.21009	0.443	0.624	7.69435274119207e-45
Sipa1l1	3.25080384320754e-49	0.525976	0.982	0.902	7.9101809916769e-45
Ifi211	3.64425310184651e-49	1.48747	0.25	0.037	8.86756107272312e-45
Ctnnd1	4.89721304627691e-49	0.336343	0.977	0.861	1.19163885055056e-44
Cdc42ep3	5.3390461743809e-49	1.48882	0.387	0.139	1.2991501056121e-44
Ralgds	5.38086474893958e-49	0.783779	0.614	0.368	1.30932581935947e-44
[truncated: 11,771 more rows]

## Sheet: Diestrus_cluster.4.25vsOth.deg
	p_val	avg_log2FC	pct.1	pct.2	p_val_adj
[truncated: 395 more rows]

## Sheet: Diestrus_cluster.5.7.13.16.21
	p_val	avg_log2FC	pct.1	pct.2	p_val_adj
[truncated: 7,740 more rows]

[truncated: 1 more sheets: Diestrus_cluster.0.2.3.10.14.24]
