# Supplementary material for: Endometrial cells with high ALDH activity contribute to uterine development and regeneration
Source: Research Square preprint supplement (doi:10.21203/rs.3.rs-6831916/v3), 2026-05-26
Supplement: Supplementary file 2 [file 2658bdcdea1e18cde030ce71.xlsx]

## Sheet: Human organoids_EuE ALDH HivsLo
ENSEMBL	SYMBOL	baseMean	log2FoldChange	lfcSE	stat	pvalue	padj
ENSG00000004838	ZMYND10	271.227	-1.1799	0.209137	-6.2279	4.73e-10	7.5e-06
ENSG00000134258	VTCN1	1131.83	1.25699	0.202533	5.98278	2.19e-09	1.2e-05
ENSG00000148053	NTRK2	266.546	-1.18179	0.202213	-5.97688	2.27e-09	1.2e-05
ENSG00000117115	PADI2	75.939	-1.17369	0.210388	-5.78683	7.17e-09	2.28e-05
ENSG00000008226	DLEC1	148.047	-1.20428	0.209321	-5.7992	6.66e-09	2.28e-05
ENSG00000167552	TUBA1A	2613.9	-1.16363	0.203222	-5.70413	1.17e-08	3.09e-05
ENSG00000162004	CCDC78	235.491	-1.15675	0.211022	-5.6048	2.08e-08	4.73e-05
ENSG00000283646	LINC02009	555.496	1.11299	0.210526	5.56205	2.67e-08	5.29e-05
ENSG00000095637	SORBS1	332.784	-1.04187	0.191909	-5.42464	5.81e-08	0.000102
ENSG00000262619	NA	785.174	0.942315	0.19088	5.00111	5.7e-07	0.000852
ENSG00000152785	BMP3	79.4686	0.501622	0.153829	4.99431	5.9e-07	0.000852
ENSG00000153246	PLA2R1	319.986	0.973959	0.199217	4.97039	6.68e-07	0.000884
ENSG00000230535	NA	1010.72	0.920978	0.189238	4.9153	8.86e-07	0.001082
ENSG00000169083	AR	170.129	-0.79028	0.203919	-4.88852	1.02e-06	0.001107
ENSG00000166592	RRAD	145.336	-0.47803	0.162643	-4.88277	1.05e-06	0.001107
ENSG00000206075	SERPINB5	63.6263	-0.9515	0.197299	-4.7996	1.59e-06	0.001577
ENSG00000120262	CCDC170	200.246	-0.99405	0.210744	-4.77308	1.81e-06	0.001694
ENSG00000135253	KCP	428.431	0.81029	0.204881	4.66758	3.05e-06	0.002418
ENSG00000113083	LOX	1070.27	0.90929	0.204089	4.67929	2.88e-06	0.002418
ENSG00000110318	CEP126	109.236	-0.96979	0.211263	-4.66821	3.04e-06	0.002418
ENSG00000135205	CCDC146	1068.31	-0.92242	0.192036	-4.63503	3.57e-06	0.002697
ENSG00000181378	CFAP65	135.823	-0.70464	0.187789	-4.60245	4.18e-06	0.003012
ENSG00000117525	F3	2139.37	0.758366	0.167782	4.5379	5.68e-06	0.003109
ENSG00000161513	FDXR	647.541	-0.81896	0.178899	-4.57324	4.8e-06	0.003109
ENSG00000203985	LDLRAD1	213.046	-0.8568	0.210831	-4.55302	5.29e-06	0.003109
ENSG00000112137	PHACTR1	154.816	0.938303	0.209464	4.54313	5.54e-06	0.003109
ENSG00000185681	MORN5	58.2355	-0.48611	0.15939	-4.54627	5.46e-06	0.003109
ENSG00000135074	ADAM19	30.9511	-0.75063	0.180943	-4.58071	4.63e-06	0.003109
ENSG00000181234	TMEM132C	17.5736	-0.41279	0.1404	-4.5681	4.92e-06	0.003109
ENSG00000166450	PRTG	273.493	0.904755	0.204878	4.51422	6.35e-06	0.003362
ENSG00000119125	GDA	7812	0.866105	0.196834	4.48938	7.14e-06	0.003542
ENSG00000164972	SPMIP6	156.044	-0.58279	0.177828	-4.48944	7.14e-06	0.003542
ENSG00000134548	SPX	672.034	0.881159	0.193958	4.47738	7.56e-06	0.003634
ENSG00000160838	LRRC71	58.7007	-0.86943	0.204325	-4.47101	7.79e-06	0.003634
ENSG00000121440	PDZRN3	324.455	0.966115	0.207974	4.45301	8.47e-06	0.003839
ENSG00000159212	CLIC6	313.766	0.89136	0.204886	4.43695	9.12e-06	0.00396
ENSG00000100077	GRK3	167.525	-0.90895	0.211279	-4.4344	9.23e-06	0.00396
ENSG00000138316	ADAMTS14	203.111	-0.87327	0.196167	-4.40953	1.04e-05	0.004326
ENSG00000123243	ITIH5	4613.19	-0.84833	0.199952	-4.3974	1.1e-05	0.004346
ENSG00000227051	C14orf132	1170.07	-0.8603	0.203874	-4.4009	1.08e-05	0.004346
ENSG00000122735	DNAI1	117.863	-0.62066	0.185136	-4.35538	1.33e-05	0.005141
ENSG00000198003	ODAD3	44.1983	-0.75858	0.193203	-4.34491	1.39e-05	0.005264
ENSG00000215217	CFAP90	166.349	-0.73669	0.19521	-4.30635	1.66e-05	0.006125
ENSG00000226321	CROCC2	93.4778	-0.64573	0.188277	-4.2805	1.86e-05	0.006725
ENSG00000110900	TSPAN11	159.056	-0.85677	0.20463	-4.25633	2.08e-05	0.007169
ENSG00000238178	NA	82.1411	-0.93701	0.205368	-4.26016	2.04e-05	0.007169
ENSG00000172175	MALT1	3552.19	-0.83263	0.193984	-4.25123	2.13e-05	0.007178
ENSG00000154099	DNAAF1	382.129	-0.85151	0.21128	-4.23294	2.31e-05	0.007586
ENSG00000100033	PRODH	179.163	-0.633	0.197518	-4.22946	2.34e-05	0.007586
ENSG00000169064	ZBBX	78.8041	-0.63057	0.187554	-4.2059	2.6e-05	0.008253
ENSG00000166963	MAP1A	104.312	-0.70864	0.192366	-4.1896	2.79e-05	0.008695
ENSG00000243836	WDR86-AS1	240.253	-0.80087	0.208025	-4.18246	2.88e-05	0.0088
ENSG00000153132	CLGN	721.902	0.66315	0.207805	4.17791	2.94e-05	0.008809
ENSG00000168589	DYNLRB2	58.9588	-0.75687	0.195233	-4.16141	3.16e-05	0.009295
ENSG00000155849	ELMO1	18.5836	-0.50554	0.154931	-4.14073	3.46e-05	0.009989
ENSG00000131401	NA	159.625	-0.44655	0.174584	-4.12752	3.67e-05	0.010391
ENSG00000166106	ADAMTS15	413.939	0.674665	0.193434	4.1183	3.82e-05	0.010626
ENSG00000117501	MROH9	24.3614	-0.38354	0.137783	-4.10977	3.96e-05	0.010836
ENSG00000100968	NFATC4	128.324	0.849752	0.208424	4.09398	4.24e-05	0.011044
ENSG00000145491	ROPN1L	164.168	-0.6443	0.188919	-4.09372	4.25e-05	0.011044
ENSG00000274276	LOC102724560	102.945	0.746978	0.204036	4.10121	4.11e-05	0.011044
ENSG00000143878	RHOB	1288.33	-0.69815	0.172979	-4.04801	5.17e-05	0.01171
ENSG00000134278	SPIRE1	852.714	0.742313	0.182756	4.06602	4.78e-05	0.01171
ENSG00000149256	TENM4	1103.19	-0.79287	0.20548	-4.0535	5.05e-05	0.01171
ENSG00000069812	HES2	253.928	-0.8726	0.209657	-4.06963	4.71e-05	0.01171
ENSG00000171811	CFAP46	175.992	-0.78823	0.211041	-4.0509	5.1e-05	0.01171
ENSG00000136918	WDR38	136.31	-0.48731	0.168201	-4.07066	4.69e-05	0.01171
ENSG00000091181	IL5RA	61.926	-0.58762	0.180202	-4.04807	5.16e-05	0.01171
ENSG00000095587	TLL2	160.955	0.87102	0.210066	4.05924	4.92e-05	0.01171
ENSG00000154545	MAGED4	35.2167	-0.48192	0.159837	-4.05883	4.93e-05	0.01171
ENSG00000058085	LAMC2	10727.1	-0.68762	0.171426	-4.01717	5.89e-05	0.013165
ENSG00000070526	ST6GALNAC1	5084.81	0.688941	0.172704	3.99631	6.43e-05	0.014082
ENSG00000170629	NA	57.6061	-0.82385	0.209333	-3.99469	6.48e-05	0.014082
ENSG00000184160	ADRA2C	561.045	0.833935	0.209471	3.98545	6.74e-05	0.014443
ENSG00000140807	NKD1	180.98	-0.77763	0.200611	-3.98123	6.86e-05	0.014506
ENSG00000136167	LCP1	1059.47	0.807437	0.201049	3.97447	7.05e-05	0.014728
ENSG00000224383	PRR29	142.969	-0.79887	0.20876	-3.96047	7.48e-05	0.015416
ENSG00000087245	MMP2	961.73	-0.86211	0.210978	-3.94352	8.03e-05	0.016336
ENSG00000007174	DNAH9	195.527	-0.54736	0.181919	-3.92994	8.5e-05	0.017068
ENSG00000179813	FAM216B	279.611	-0.56378	0.181089	-3.89464	9.83e-05	0.017735
ENSG00000111834	RSPH4A	182.61	-0.67235	0.196033	-3.91105	9.19e-05	0.017735
ENSG00000166596	CFAP52	137.801	-0.66644	0.194226	-3.90319	9.49e-05	0.017735
ENSG00000272899	SPMIP1	73.7836	0.817297	0.21031	3.90293	9.5e-05	0.017735
ENSG00000104059	ENTREP2	50.7363	-0.70569	0.189969	-3.90331	9.49e-05	0.017735
ENSG00000152611	CAPSL	89.1148	-0.56309	0.179366	-3.90966	9.24e-05	0.017735
ENSG00000137691	CFAP300	103.279	-0.81088	0.2112	-3.89699	9.74e-05	0.017735
ENSG00000186081	KRT5	43.8566	-0.62132	0.169556	-3.90473	9.43e-05	0.017735
ENSG00000127249	ATP13A4	39.5093	0.631849	0.185838	3.89869	9.67e-05	0.017735
ENSG00000231412	LINC03078	166.697	0.679324	0.204758	3.88485	0.000102	0.018243
ENSG00000186417	GLDN	120.769	0.796284	0.210258	3.88232	0.000103	0.018243
ENSG00000145198	VWA5B2	26.9424	-0.62613	0.182525	-3.85878	0.000114	0.019872
ENSG00000112715	VEGFA	5030.28	0.641221	0.165684	3.83573	0.000125	0.021594
ENSG00000140465	CYP1A1	432.475	0.801955	0.209254	3.82415	0.000131	0.022153
ENSG00000204950	LRRC10B	101.231	-0.60808	0.189513	-3.82536	0.000131	0.022153
ENSG00000187260	WDR86	280.984	-0.79166	0.206113	-3.81591	0.000136	0.022197
ENSG00000186710	CFAP73	110.414	-0.67236	0.197728	-3.81651	0.000135	0.022197
ENSG00000188523	CFAP77	107.344	-0.52479	0.174708	-3.82002	0.000133	0.022197
ENSG00000178053	MLF1	322.221	-0.63529	0.200047	-3.79629	0.000147	0.023543
ENSG00000169126	ODAD2	62.7063	-0.54308	0.176844	-3.79863	0.000145	0.023543
ENSG00000055609	KMT2C	2492.57	0.657054	0.173846	3.7937	0.000148	0.023553
ENSG00000184613	NELL2	484.011	0.754839	0.210774	3.78722	0.000152	0.023728
ENSG00000141294	LRRC46	250.328	-0.7103	0.204847	-3.78462	0.000154	0.023728
ENSG00000126010	GRPR	127.424	-0.70421	0.191146	-3.78451	0.000154	0.023728
ENSG00000197748	CFAP43	273.623	-0.7705	0.21108	-3.77313	0.000161	0.024365
ENSG00000165164	CFAP47	72.6869	-0.59322	0.18957	-3.77324	0.000161	0.024365
ENSG00000090776	EFNB1	1083.4	-0.64176	0.1713	-3.74959	0.000177	0.025322
ENSG00000105479	ODAD1	101.268	-0.67085	0.194706	-3.75881	0.000171	0.025322
ENSG00000188659	SAXO2	133.414	-0.76225	0.210963	-3.75195	0.000175	0.025322
ENSG00000215187	CIMIP2B	98.3052	-0.49595	0.171136	-3.75184	0.000176	0.025322
ENSG00000183580	FBXL7	196.846	-0.52554	0.174273	-3.75597	0.000173	0.025322
ENSG00000163491	NEK10	64.2978	-0.73758	0.206584	-3.75842	0.000171	0.025322
ENSG00000148346	LCN2	23694.9	0.697427	0.193337	3.74545	0.00018	0.025514
ENSG00000121039	RDH10	2954.09	0.758305	0.20121	3.73498	0.000188	0.026132
ENSG00000176920	FUT2	657.759	0.732749	0.200961	3.73537	0.000187	0.026132
ENSG00000070159	PTPN3	2192.38	0.615946	0.165937	3.71602	0.000202	0.027927
ENSG00000179348	GATA2	34.4494	0.613148	0.184848	3.70824	0.000209	0.028551
ENSG00000187601	MAGEH1	53.7712	-0.53114	0.173166	-3.70019	0.000215	0.02922
ENSG00000168918	INPP5D	826.888	-0.72114	0.202516	-3.67896	0.000234	0.030713
ENSG00000157423	HYDIN	458.009	-0.70157	0.191763	-3.68084	0.000232	0.030713
ENSG00000152229	PSTPIP2	524.626	-0.69015	0.187047	-3.68075	0.000233	0.030713
ENSG00000176601	MAP3K19	80.4549	-0.53111	0.184128	-3.68168	0.000232	0.030713
ENSG00000158486	DNAH3	124.916	-0.53419	0.17989	-3.65752	0.000255	0.032074
ENSG00000139537	DRC2	165.822	-0.74912	0.20555	-3.6597	0.000253	0.032074
ENSG00000136859	ANGPTL2	185.307	0.607289	0.178412	3.66149	0.000251	0.032074
ENSG00000139269	INHBE	204.706	0.547711	0.186377	3.66464	0.000248	0.032074
ENSG00000112539	C6orf118	60.163	-0.49275	0.17013	-3.65946	0.000253	0.032074
ENSG00000164237	CMBL	178.63	-0.69601	0.188415	-3.65383	0.000258	0.032282
ENSG00000104856	RELB	1002.54	-0.62476	0.171214	-3.64501	0.000267	0.033149
ENSG00000092068	SLC7A8	150.022	0.580732	0.186266	3.63917	0.000274	0.033647
ENSG00000101222	SPEF1	143.383	-0.70136	0.207705	-3.63505	0.000278	0.033926
ENSG00000174844	DNAH12	103.476	-0.6312	0.202059	-3.6266	0.000287	0.034788
ENSG00000147862	NFIB	928.154	0.65816	0.18303	3.62271	0.000292	0.035048
ENSG00000146674	IGFBP3	5223.57	0.634269	0.180575	3.61262	0.000303	0.036166
ENSG00000175267	VWA3A	112.835	-0.53995	0.186395	-3.59576	0.000323	0.038305
ENSG00000160200	CBS	1081.74	0.695859	0.20941	3.591	0.000329	0.038437
ENSG00000260220	CCDC187	184.316	-0.58098	0.183591	-3.59172	0.000329	0.038437
ENSG00000163040	CCDC74A	76.733	-0.7001	0.207041	-3.56761	0.00036	0.041728
ENSG00000161714	PLCD3	1433.25	-0.69788	0.197791	-3.56239	0.000367	0.04226
ENSG00000182272	B4GALNT4	481.859	-0.6906	0.208552	-3.54911	0.000387	0.044129
ENSG00000250986	NA	67.5007	0.718579	0.206477	3.547	0.00039	0.044167
ENSG00000235523	NA	38.3784	0.61785	0.193505	3.54129	0.000398	0.044814
ENSG00000157856	DRC1	181.665	-0.53576	0.180102	-3.53621	0.000406	0.044831
ENSG00000179902	CFAP276	102.275	-0.59223	0.183457	-3.53562	0.000407	0.044831
ENSG00000168824	NSG1	162.162	-0.7689	0.210933	-3.53696	0.000405	0.044831
ENSG00000143869	GDF7	405.47	-0.57444	0.198871	-3.53035	0.000415	0.04542
ENSG00000074657	ZNF532	806.754	0.691198	0.198042	3.52493	0.000424	0.046035
ENSG00000159625	DRC7	112.886	-0.48027	0.172354	-3.5216	0.000429	0.046035
ENSG00000188596	CFAP54	82.1843	-0.66879	0.207615	-3.52136	0.000429	0.046035
ENSG00000160188	RSPH1	481.789	-0.728	0.211258	-3.51888	0.000433	0.046155
ENSG00000155761	SPAG17	84.4143	-0.58698	0.192948	-3.51475	0.00044	0.046566
ENSG00000228723	SRGAP3-AS2	30.504	-0.51501	0.174322	-3.5108	0.000447	0.046951
ENSG00000087903	RFX2	188.36	-0.70576	0.210625	-3.50509	0.000456	0.047654
ENSG00000071073	MGAT4A	1073.6	0.634224	0.183197	3.49451	0.000475	0.048939
ENSG00000115423	DNAH6	155.596	-0.621	0.198635	-3.49491	0.000474	0.048939
ENSG00000234685	NA	612.247	0.629238	0.18045	3.48937	0.000484	0.049251
ENSG00000250305	TRMT9B	50.9471	-0.40538	0.159863	-3.49045	0.000482	0.049251
ENSG00000167281	RBFOX3	614.589	-0.70427	0.210845	-3.48325	0.000495	0.049824
ENSG00000171488	LRRC8C	178.738	0.751557	0.211192	3.48287	0.000496	0.049824
ENSG00000178752	ERFE	896.563	0.645144	0.210189	3.48043	0.000501	0.049964
ENSG00000125384	PTGER2	129.824	-0.71636	0.208382	-3.47811	0.000505	0.050083
ENSG00000159921	GNE	1490.44	0.649964	0.187414	3.46526	0.00053	0.051358
ENSG00000182158	CREB3L2	1209.56	0.609416	0.176545	3.46256	0.000535	0.051358
ENSG00000148735	PLEKHS1	215.194	-0.56102	0.19664	-3.46163	0.000537	0.051358
ENSG00000142156	COL6A1	246.571	-0.56234	0.178844	-3.45985	0.00054	0.051358
ENSG00000173947	CIMAP3	444.811	-0.53276	0.190862	-3.46347	0.000533	0.051358
ENSG00000267107	PCAT19	69.5237	-0.34886	0.153007	-3.46686	0.000527	0.051358
ENSG00000132911	NMUR2	105.628	0.630815	0.204672	3.46137	0.000537	0.051358
ENSG00000008517	IL32	2047.99	-0.70471	0.21014	-3.45646	0.000547	0.051698
ENSG00000103534	TMC5	2028.72	0.674346	0.20878	3.43949	0.000583	0.054403
ENSG00000166959	MS4A8	302.917	-0.16538	0.11434	-3.44047	0.000581	0.054403
ENSG00000079215	SLC1A3	1564.32	-0.62265	0.185081	-3.42989	0.000604	0.055246
ENSG00000114638	UPK1B	95.1831	0.513775	0.164661	3.42872	0.000606	0.055246
ENSG00000081059	TCF7	200.869	-0.70129	0.207588	-3.42747	0.000609	0.055246
ENSG00000153347	FAM81B	85.7218	-0.60724	0.192962	-3.43174	0.0006	0.055246
ENSG00000104237	RP1	54.5832	-0.65124	0.194501	-3.43286	0.000597	0.055246
ENSG00000184156	KCNQ3	190.816	-0.61063	0.203341	-3.42248	0.000621	0.055949
ENSG00000197457	STMN3	654.053	-0.72582	0.208996	-3.41033	0.000649	0.058172
ENSG00000259330	INAFM2	457.403	-0.63051	0.184796	-3.40727	0.000656	0.058451
ENSG00000162643	DNAI3	50.3169	-0.51706	0.186227	-3.40596	0.000659	0.058451
ENSG00000167992	VWCE	183.319	-0.72723	0.202852	-3.39485	0.000687	0.060538
ENSG00000034239	CLXN	129.297	-0.42082	0.162492	-3.38347	0.000716	0.062754
ENSG00000215182	MUC5AC	453.306	0.713858	0.209727	3.37839	0.000729	0.063572
ENSG00000085741	WNT11	89.099	-0.53276	0.191954	-3.36736	0.000759	0.065811
ENSG00000105472	CLEC11A	77.9649	-0.70346	0.211277	-3.35973	0.00078	0.0672
ENSG00000174776	WDR49	30.3858	-0.57703	0.18701	-3.35859	0.000783	0.0672
ENSG00000232415	ELN-AS1	17.6615	-0.41566	0.15297	-3.35174	0.000803	0.068513
ENSG00000152661	GJA1	641.195	0.655995	0.210247	3.34395	0.000826	0.069348
ENSG00000131188	PRR7	190.785	-0.67497	0.205735	-3.34496	0.000823	0.069348
ENSG00000189350	TOGARAM2	61.3637	-0.50304	0.174964	-3.34454	0.000824	0.069348
ENSG00000176046	NUPR1	1810.36	0.622917	0.211069	3.33929	0.00084	0.069401
ENSG00000100031	GGT1	363.881	0.652693	0.210798	3.33917	0.00084	0.069401
ENSG00000167858	TEKT1	177.381	-0.43641	0.170467	-3.33511	0.000853	0.069401
ENSG00000125538	IL1B	427.63	0.447636	0.200374	3.33506	0.000853	0.069401
ENSG00000079931	MOXD1	80.1409	0.679917	0.194108	3.34015	0.000837	0.069401
ENSG00000152076	CCDC74B	38.8671	-0.63909	0.200208	-3.33616	0.000849	0.069401
ENSG00000172201	ID4	3857.31	-0.67136	0.205706	-3.33152	0.000864	0.069932
ENSG00000183914	DNAH2	136.315	-0.58432	0.19614	-3.32684	0.000878	0.070399
ENSG00000167646	DNAAF3	128.661	-0.69833	0.210707	-3.32819	0.000874	0.070399
ENSG00000175592	FOSL1	192.852	-0.68028	0.205433	-3.32073	0.000898	0.070883
ENSG00000147573	TRIM55	96.4469	-0.2507	0.166235	-3.32092	0.000897	0.070883
ENSG00000198046	ZNF667	69.4579	-0.37337	0.154981	-3.32101	0.000897	0.070883
ENSG00000270164	LINC01480	60.234	-0.20049	0.137914	-3.31838	0.000905	0.071129
ENSG00000258484	SPESP1	25.594	0.439198	0.154062	3.31063	0.000931	0.072767
ENSG00000129654	FOXJ1	2399.17	-0.67376	0.204596	-3.29975	0.000968	0.074911
ENSG00000114251	WNT5A	715.603	0.618153	0.18936	3.30015	0.000966	0.074911
ENSG00000007062	PROM1	21567.9	0.633899	0.187828	3.29263	0.000993	0.075359
ENSG00000152953	STK32B	391.287	-0.64911	0.201125	-3.29046	0.001	0.075359
ENSG00000147027	TMEM47	155.106	-0.67413	0.208873	-3.29363	0.000989	0.075359
ENSG00000243710	CFAP57	123.23	-0.67246	0.20982	-3.29291	0.000992	0.075359
ENSG00000243910	TUBA4B	91.0805	-0.46415	0.168611	-3.28997	0.001002	0.075359
ENSG00000198796	ALPK2	56.918	-0.61002	0.176071	-3.29151	0.000997	0.075359
ENSG00000168658	VWA3B	112.088	-0.47981	0.178602	-3.28674	0.001014	0.075867
ENSG00000198624	CCDC69	89.5556	-0.60483	0.19743	-3.28316	0.001026	0.076476
ENSG00000107099	DOCK8	218.883	0.668116	0.201747	3.27861	0.001043	0.076998
ENSG00000138795	LEF1	68.9032	-0.40077	0.173117	-3.27951	0.00104	0.076998
ENSG00000153789	CIBAR2	77.5093	-0.38283	0.161367	-3.27558	0.001054	0.077468
ENSG00000134574	DDB2	805.746	-0.61238	0.187589	-3.26907	0.001079	0.077965
ENSG00000205583	NA	113.233	0.691558	0.210216	3.27016	0.001075	0.077965
ENSG00000170324	FRMPD2	154.663	-0.5261	0.196688	-3.26858	0.001081	0.077965
ENSG00000130540	SULT4A1	20.7763	-0.55159	0.174543	-3.2722	0.001067	0.077965
ENSG00000242574	HLA-DMB	4281.42	0.581184	0.183324	3.26643	0.001089	0.078205
ENSG00000124939	SCGB2A1	1691.69	-0.55894	0.173061	-3.2648	0.001095	0.078284
ENSG00000180914	OXTR	72.7027	-0.68865	0.203867	-3.26359	0.0011	0.078284
ENSG00000198948	MFAP3L	477.222	0.62636	0.189828	3.26021	0.001113	0.078871
ENSG00000067445	TRO	46.7272	-0.42912	0.169033	-3.25858	0.00112	0.078972
ENSG00000105877	DNAH11	89.7747	-0.53401	0.191722	-3.25368	0.001139	0.079991
ENSG00000170099	SERPINA6	43.091	-0.27699	0.153606	-3.24908	0.001158	0.080939
ENSG00000172578	KLHL6	44.3806	-0.26357	0.132187	-3.23711	0.001207	0.084042
ENSG00000258752	NA	51.0937	-0.45892	0.173819	-3.23188	0.00123	0.084641
ENSG00000206199	ANKUB1	37.7047	-0.42027	0.161876	-3.23135	0.001232	0.084641
ENSG00000169862	CTNND2	16.8141	-0.44095	0.158371	-3.23297	0.001225	0.084641
ENSG00000160401	CFAP157	206.021	-0.67071	0.210503	-3.2204	0.00128	0.087562
ENSG00000248144	ADH1C	65.9273	0.586901	0.181736	3.21677	0.001296	0.088296
ENSG00000244300	NA	30.0609	0.462071	0.172229	3.21386	0.00131	0.088714
ENSG00000204103	MAFB	94.201	-0.58062	0.207303	-3.21296	0.001314	0.088714
ENSG00000103021	CFAP263	352.123	-0.64503	0.19931	-3.21114	0.001322	0.088899
ENSG00000196169	KIF19	110.993	-0.37096	0.158741	-3.19989	0.001375	0.092053
ENSG00000164236	ANKRD33B	670.52	-0.59012	0.184029	-3.18768	0.001434	0.095627
ENSG00000137673	MMP7	54574.9	-0.67472	0.204531	-3.17778	0.001484	0.098539

## Sheet: DN, p<0.05, L2FC1
ENSEMBL	baseMean	log2FoldChange	lfcSE	stat	pvalue	padj	SYMBOL
ENSG00000008226	148.047	-1.20428	0.209321	-5.7992	6.66306e-09	2.27644e-05	DLEC1
ENSG00000148053	266.546	-1.18179	0.202213	-5.97688	2.27457e-09	1.20317e-05	NTRK2
ENSG00000004838	271.227	-1.1799	0.209137	-6.2279	4.72724e-10	7.50165e-06	ZMYND10
ENSG00000117115	75.939	-1.17369	0.210388	-5.78683	7.1726e-09	2.27644e-05	PADI2
ENSG00000167552	2613.9	-1.16363	0.203222	-5.70413	1.16942e-08	3.09292e-05	TUBA1A
ENSG00000162004	235.491	-1.15675	0.211022	-5.6048	2.08493e-08	4.72654e-05	CCDC78
ENSG00000095637	332.784	-1.04187	0.191909	-5.42464	5.80721e-08	0.000102	SORBS1
ENSG00000120262	200.246	-0.99405	0.210744	-4.77308	1.81432e-06	0.001694	CCDC170
ENSG00000110318	109.236	-0.96979	0.211263	-4.66821	3.03837e-06	0.002418	CEP126
ENSG00000206075	63.6263	-0.9515	0.197299	-4.7996	1.58982e-06	0.001577	SERPINB5
ENSG00000238178	82.1411	-0.93701	0.205368	-4.26016	2.04282e-05	0.007169	NA
ENSG00000135205	1068.31	-0.92242	0.192036	-4.63503	3.56888e-06	0.002697	CCDC146
ENSG00000100077	167.525	-0.90895	0.211279	-4.4344	9.23311e-06	0.00396	GRK3
ENSG00000138316	203.111	-0.87327	0.196167	-4.40953	1.03597e-05	0.004326	ADAMTS14
ENSG00000069812	253.928	-0.8726	0.209657	-4.06963	4.70879e-05	0.01171	HES2
ENSG00000160838	58.7007	-0.86943	0.204325	-4.47101	7.7851e-06	0.003634	LRRC71
ENSG00000087245	961.73	-0.86211	0.210978	-3.94352	8.02937e-05	0.016336	MMP2
ENSG00000227051	1170.07	-0.8603	0.203874	-4.4009	1.07804e-05	0.004346	C14orf132
ENSG00000203985	213.046	-0.8568	0.210831	-4.55302	5.2882e-06	0.003109	LDLRAD1
ENSG00000110900	159.056	-0.85677	0.20463	-4.25633	2.07814e-05	0.007169	TSPAN11
ENSG00000154099	382.129	-0.85151	0.21128	-4.23294	2.30654e-05	0.007586	DNAAF1
ENSG00000123243	4613.19	-0.84833	0.199952	-4.3974	1.09556e-05	0.004346	ITIH5
ENSG00000172175	3552.19	-0.83263	0.193984	-4.25123	2.12596e-05	0.007178	MALT1
ENSG00000170629	57.6061	-0.82385	0.209333	-3.99469	6.47796e-05	0.014082	NA
ENSG00000161513	647.541	-0.81896	0.178899	-4.57324	4.80249e-06	0.003109	FDXR
ENSG00000137691	103.279	-0.81088	0.2112	-3.89699	9.73937e-05	0.017735	CFAP300
ENSG00000243836	240.253	-0.80087	0.208025	-4.18246	2.88365e-05	0.0088	WDR86-AS1
ENSG00000224383	142.969	-0.79887	0.20876	-3.96047	7.48015e-05	0.015416	PRR29
ENSG00000149256	1103.19	-0.79287	0.20548	-4.0535	5.04561e-05	0.01171	TENM4
ENSG00000187260	280.984	-0.79166	0.206113	-3.81591	0.000136	0.022197	WDR86
ENSG00000169083	170.129	-0.79028	0.203919	-4.88852	1.01595e-06	0.001107	AR
ENSG00000171811	175.992	-0.78823	0.211041	-4.0509	5.10215e-05	0.01171	CFAP46
ENSG00000140807	180.98	-0.77763	0.200611	-3.98123	6.85591e-05	0.014506	NKD1
ENSG00000197748	273.623	-0.7705	0.21108	-3.77313	0.000161	0.024365	CFAP43
ENSG00000168824	162.162	-0.7689	0.210933	-3.53696	0.000405	0.044831	NSG1
ENSG00000188659	133.414	-0.76225	0.210963	-3.75195	0.000175	0.025322	SAXO2
ENSG00000198003	44.1983	-0.75858	0.193203	-4.34491	1.39333e-05	0.005264	ODAD3
ENSG00000168589	58.9588	-0.75687	0.195233	-4.16141	3.16283e-05	0.009295	DYNLRB2
ENSG00000135074	30.9511	-0.75063	0.180943	-4.58071	4.63404e-06	0.003109	ADAM19
ENSG00000139537	165.822	-0.74912	0.20555	-3.6597	0.000253	0.032074	DRC2
ENSG00000163491	64.2978	-0.73758	0.206584	-3.75842	0.000171	0.025322	NEK10
ENSG00000215217	166.349	-0.73669	0.19521	-4.30635	1.6597e-05	0.006125	CFAP90
ENSG00000160188	481.789	-0.728	0.211258	-3.51888	0.000433	0.046155	RSPH1
ENSG00000168918	826.888	-0.72114	0.202516	-3.67896	0.000234	0.030713	INPP5D
ENSG00000141294	250.328	-0.7103	0.204847	-3.78462	0.000154	0.023728	LRRC46
ENSG00000166963	104.312	-0.70864	0.192366	-4.1896	2.79445e-05	0.008695	MAP1A
ENSG00000087903	188.36	-0.70576	0.210625	-3.50509	0.000456	0.047654	RFX2
ENSG00000104059	50.7363	-0.70569	0.189969	-3.90331	9.48864e-05	0.017735	ENTREP2
ENSG00000181378	135.823	-0.70464	0.187789	-4.60245	4.17545e-06	0.003012	CFAP65
ENSG00000167281	614.589	-0.70427	0.210845	-3.48325	0.000495	0.049824	RBFOX3
ENSG00000126010	127.424	-0.70421	0.191146	-3.78451	0.000154	0.023728	GRPR
ENSG00000157423	458.009	-0.70157	0.191763	-3.68084	0.000232	0.030713	HYDIN
ENSG00000101222	143.383	-0.70136	0.207705	-3.63505	0.000278	0.033926	SPEF1
ENSG00000163040	76.733	-0.7001	0.207041	-3.56761	0.00036	0.041728	CCDC74A
ENSG00000143878	1288.33	-0.69815	0.172979	-4.04801	5.16554e-05	0.01171	RHOB
ENSG00000161714	1433.25	-0.69788	0.197791	-3.56239	0.000367	0.04226	PLCD3
ENSG00000164237	178.63	-0.69601	0.188415	-3.65383	0.000258	0.032282	CMBL
ENSG00000182272	481.859	-0.6906	0.208552	-3.54911	0.000387	0.044129	B4GALNT4
ENSG00000152229	524.626	-0.69015	0.187047	-3.68075	0.000233	0.030713	PSTPIP2
ENSG00000058085	10727.1	-0.68762	0.171426	-4.01717	5.89011e-05	0.013165	LAMC2
ENSG00000186710	110.414	-0.67236	0.197728	-3.81651	0.000135	0.022197	CFAP73
ENSG00000111834	182.61	-0.67235	0.196033	-3.91105	9.18961e-05	0.017735	RSPH4A
ENSG00000105479	101.268	-0.67085	0.194706	-3.75881	0.000171	0.025322	ODAD1
ENSG00000188596	82.1843	-0.66879	0.207615	-3.52136	0.000429	0.046035	CFAP54
ENSG00000166596	137.801	-0.66644	0.194226	-3.90319	9.49324e-05	0.017735	CFAP52
ENSG00000226321	93.4778	-0.64573	0.188277	-4.2805	1.86471e-05	0.006725	CROCC2
ENSG00000145491	164.168	-0.6443	0.188919	-4.09372	4.24512e-05	0.011044	ROPN1L
ENSG00000090776	1083.4	-0.64176	0.1713	-3.74959	0.000177	0.025322	EFNB1
ENSG00000178053	322.221	-0.63529	0.200047	-3.79629	0.000147	0.023543	MLF1
ENSG00000100033	179.163	-0.633	0.197518	-4.22946	2.34248e-05	0.007586	PRODH
ENSG00000174844	103.476	-0.6312	0.202059	-3.6266	0.000287	0.034788	DNAH12
ENSG00000169064	78.8041	-0.63057	0.187554	-4.2059	2.60047e-05	0.008253	ZBBX
ENSG00000145198	26.9424	-0.62613	0.182525	-3.85878	0.000114	0.019872	VWA5B2
ENSG00000104856	1002.54	-0.62476	0.171214	-3.64501	0.000267	0.033149	RELB
ENSG00000186081	43.8566	-0.62132	0.169556	-3.90473	9.43313e-05	0.017735	KRT5
ENSG00000115423	155.596	-0.621	0.198635	-3.49491	0.000474	0.048939	DNAH6
ENSG00000122735	117.863	-0.62066	0.185136	-4.35538	1.32834e-05	0.005141	DNAI1
ENSG00000204950	101.231	-0.60808	0.189513	-3.82536	0.000131	0.022153	LRRC10B
ENSG00000165164	72.6869	-0.59322	0.18957	-3.77324	0.000161	0.024365	CFAP47
ENSG00000179902	102.275	-0.59223	0.183457	-3.53562	0.000407	0.044831	CFAP276
ENSG00000091181	61.926	-0.58762	0.180202	-4.04807	5.16408e-05	0.01171	IL5RA
ENSG00000155761	84.4143	-0.58698	0.192948	-3.51475	0.00044	0.046566	SPAG17
ENSG00000164972	156.044	-0.58279	0.177828	-4.48944	7.14092e-06	0.003542	SPMIP6
ENSG00000260220	184.316	-0.58098	0.183591	-3.59172	0.000329	0.038437	CCDC187
ENSG00000143869	405.47	-0.57444	0.198871	-3.53035	0.000415	0.04542	GDF7
ENSG00000179813	279.611	-0.56378	0.181089	-3.89464	9.83458e-05	0.017735	FAM216B
ENSG00000152611	89.1148	-0.56309	0.179366	-3.90966	9.24264e-05	0.017735	CAPSL
ENSG00000007174	195.527	-0.54736	0.181919	-3.92994	8.49669e-05	0.017068	DNAH9
ENSG00000169126	62.7063	-0.54308	0.176844	-3.79863	0.000145	0.023543	ODAD2
ENSG00000175267	112.835	-0.53995	0.186395	-3.59576	0.000323	0.038305	VWA3A
ENSG00000157856	181.665	-0.53576	0.180102	-3.53621	0.000406	0.044831	DRC1
ENSG00000158486	124.916	-0.53419	0.17989	-3.65752	0.000255	0.032074	DNAH3
ENSG00000187601	53.7712	-0.53114	0.173166	-3.70019	0.000215	0.02922	MAGEH1
ENSG00000176601	80.4549	-0.53111	0.184128	-3.68168	0.000232	0.030713	MAP3K19
ENSG00000183580	196.846	-0.52554	0.174273	-3.75597	0.000173	0.025322	FBXL7
ENSG00000188523	107.344	-0.52479	0.174708	-3.82002	0.000133	0.022197	CFAP77
ENSG00000228723	30.504	-0.51501	0.174322	-3.5108	0.000447	0.046951	SRGAP3-AS2
ENSG00000155849	18.5836	-0.50554	0.154931	-4.14073	3.46205e-05	0.009989	ELMO1

## Sheet: UP, p<0.05, L2FC1
ENSEMBL	baseMean	log2FoldChange	lfcSE	stat	pvalue	padj	SYMBOL
ENSG00000152785	79.4686	0.501622	0.153829	4.99431	5.9047e-07	0.000852	BMP3
ENSG00000139269	204.706	0.547711	0.186377	3.66464	0.000248	0.032074	INHBE
ENSG00000092068	150.022	0.580732	0.186266	3.63917	0.000274	0.033647	SLC7A8
ENSG00000136859	185.307	0.607289	0.178412	3.66149	0.000251	0.032074	ANGPTL2
ENSG00000179348	34.4494	0.613148	0.184848	3.70824	0.000209	0.028551	GATA2
ENSG00000070159	2192.38	0.615946	0.165937	3.71602	0.000202	0.027927	PTPN3
ENSG00000235523	38.3784	0.61785	0.193505	3.54129	0.000398	0.044814	NA
ENSG00000234685	612.248	0.629238	0.18045	3.48937	0.000484	0.049251	NA
ENSG00000127249	39.5092	0.631849	0.185838	3.89869	9.67154e-05	0.017735	ATP13A4
ENSG00000071073	1073.6	0.634224	0.183197	3.49451	0.000475	0.048939	MGAT4A
ENSG00000146674	5223.57	0.634269	0.180575	3.61262	0.000303	0.036166	IGFBP3
ENSG00000112715	5030.28	0.641221	0.165684	3.83573	0.000125	0.021594	VEGFA
ENSG00000178752	896.563	0.645144	0.210189	3.48043	0.000501	0.049964	ERFE
ENSG00000055609	2492.56	0.657054	0.173846	3.7937	0.000148	0.023553	KMT2C
ENSG00000147862	928.154	0.65816	0.18303	3.62271	0.000292	0.035048	NFIB
ENSG00000153132	721.902	0.66315	0.207805	4.17791	2.94193e-05	0.008809	CLGN
ENSG00000166106	413.939	0.674665	0.193434	4.1183	3.81679e-05	0.010626	ADAMTS15
ENSG00000231412	166.697	0.679324	0.204758	3.88485	0.000102	0.018243	LINC03078
ENSG00000070526	5084.82	0.688941	0.172704	3.99631	6.43375e-05	0.014082	ST6GALNAC1
ENSG00000074657	806.754	0.691198	0.198042	3.52493	0.000424	0.046035	ZNF532
ENSG00000160200	1081.74	0.695859	0.20941	3.591	0.000329	0.038437	CBS
ENSG00000148346	23694.9	0.697427	0.193337	3.74545	0.00018	0.025514	LCN2
ENSG00000250986	67.5007	0.718579	0.206477	3.547	0.00039	0.044167	NA
ENSG00000176920	657.759	0.732749	0.200961	3.73537	0.000187	0.026132	FUT2
ENSG00000134278	852.714	0.742313	0.182756	4.06602	4.78231e-05	0.01171	SPIRE1
ENSG00000274276	102.945	0.746978	0.204036	4.10121	4.10986e-05	0.011044	LOC102724560
ENSG00000171488	178.738	0.751557	0.211192	3.48287	0.000496	0.049824	LRRC8C
ENSG00000184613	484.011	0.754839	0.210774	3.78722	0.000152	0.023728	NELL2
ENSG00000121039	2954.09	0.758305	0.20121	3.73498	0.000188	0.026132	RDH10
ENSG00000117525	2139.37	0.758366	0.167782	4.5379	5.6818e-06	0.003109	F3
ENSG00000186417	120.769	0.796284	0.210258	3.88232	0.000103	0.018243	GLDN
ENSG00000140465	432.475	0.801955	0.209254	3.82415	0.000131	0.022153	CYP1A1
ENSG00000136167	1059.47	0.807437	0.201049	3.97447	7.05352e-05	0.014728	LCP1
ENSG00000135253	428.431	0.81029	0.204881	4.66758	3.0477e-06	0.002418	KCP
ENSG00000272899	73.7835	0.817297	0.21031	3.90293	9.50353e-05	0.017735	SPMIP1
ENSG00000184160	561.045	0.833935	0.209471	3.98545	6.7351e-05	0.014443	ADRA2C
ENSG00000100968	128.324	0.849752	0.208424	4.09398	4.24032e-05	0.011044	NFATC4
ENSG00000119125	7812	0.866105	0.196834	4.48938	7.14318e-06	0.003542	GDA
ENSG00000095587	160.955	0.87102	0.210066	4.05924	4.92331e-05	0.01171	TLL2
ENSG00000134548	672.034	0.881159	0.193958	4.47738	7.55644e-06	0.003634	SPX
ENSG00000159212	313.766	0.89136	0.204886	4.43695	9.12425e-06	0.00396	CLIC6
ENSG00000166450	273.493	0.904755	0.204878	4.51422	6.35488e-06	0.003362	PRTG
ENSG00000113083	1070.27	0.90929	0.204089	4.67929	2.87872e-06	0.002418	LOX
ENSG00000230535	1010.72	0.920978	0.189238	4.9153	8.86457e-07	0.001082	NA
ENSG00000112137	154.816	0.938303	0.209464	4.54313	5.54245e-06	0.003109	PHACTR1
ENSG00000262619	785.174	0.942315	0.19088	5.00111	5.70012e-07	0.000852	NA
ENSG00000121440	324.455	0.966115	0.207974	4.45301	8.4676e-06	0.003839	PDZRN3
ENSG00000153246	319.986	0.973959	0.199217	4.97039	6.68183e-07	0.000884	PLA2R1
ENSG00000283646	555.496	1.11299	0.210526	5.56205	2.6662e-08	5.28873e-05	LINC02009
ENSG00000134258	1131.82	1.25699	0.202533	5.98278	2.19359e-09	1.20317e-05	VTCN1

## Sheet: DOWN_HivLo_GO
ID		Description	GeneRatio	p.adjust	Count	geneID
GO:0007018	BP	microtubule-based movement	0.4	1.4601e-25	28	ZMYND10/TUBA1A/DNAAF1/CFAP46/CFAP43/ODAD3/DYNLRB2/CCDC65/NEK10/MAP1A/CFAP65/HYDIN/SPEF1/CFAP73/RSPH4A/ODAD1/CFAP54/CFAP52/ROPN1L/DNAH12/DNAH6/DNAI1/CFAP47/SPAG17/DNAH9/ODAD2/DRC1/DNAH3
GO:0003341	BP	cilium movement	0.342857	3.6797e-27	24	ZMYND10/DNAAF1/CFAP46/CFAP43/ODAD3/CCDC65/NEK10/CFAP65/HYDIN/SPEF1/CFAP73/RSPH4A/ODAD1/CFAP54/CFAP52/ROPN1L/DNAH6/DNAI1/CFAP47/SPAG17/DNAH9/ODAD2/DRC1/DNAH3
GO:0060271	BP	cilium assembly	0.3	4.4115e-17	21	ZMYND10/CEP126/DNAAF1/CFAP46/CFAP43/ODAD3/CCDC65/RSPH1/RFX2/CFAP65/HYDIN/SPEF1/CFAP73/RSPH4A/ODAD1/CFAP54/DNAI1/CFAP47/SPAG17/ODAD2/DRC1
GO:0044782	BP	cilium organization	0.3	1.6809e-16	21	ZMYND10/CEP126/DNAAF1/CFAP46/CFAP43/ODAD3/CCDC65/RSPH1/RFX2/CFAP65/HYDIN/SPEF1/CFAP73/RSPH4A/ODAD1/CFAP54/DNAI1/CFAP47/SPAG17/ODAD2/DRC1
GO:0035082	BP	axoneme assembly	0.257143	6.7962e-24	18	ZMYND10/DNAAF1/CFAP46/CFAP43/ODAD3/CCDC65/RSPH1/CFAP65/HYDIN/SPEF1/CFAP73/RSPH4A/ODAD1/DNAI1/CFAP47/SPAG17/ODAD2/DRC1
GO:0001578	BP	microtubule bundle formation	0.257143	8.2791e-22	18	ZMYND10/DNAAF1/CFAP46/CFAP43/ODAD3/CCDC65/RSPH1/CFAP65/HYDIN/SPEF1/CFAP73/RSPH4A/ODAD1/DNAI1/CFAP47/SPAG17/ODAD2/DRC1
GO:0001539	BP	cilium or flagellum-dependent cell motility	0.214286	3.8868e-15	15	CFAP46/CFAP43/ODAD3/CCDC65/CFAP65/RSPH4A/CFAP54/CFAP52/ROPN1L/DNAH6/DNAI1/CFAP47/DNAH9/DRC1/DNAH3
GO:0060285	BP	cilium-dependent cell motility	0.214286	3.8868e-15	15	CFAP46/CFAP43/ODAD3/CCDC65/CFAP65/RSPH4A/CFAP54/CFAP52/ROPN1L/DNAH6/DNAI1/CFAP47/DNAH9/DRC1/DNAH3
GO:0060294	BP	cilium movement involved in cell motility	0.185714	1.8238e-12	13	CFAP46/CFAP43/ODAD3/CFAP65/RSPH4A/CFAP54/CFAP52/ROPN1L/DNAH6/DNAI1/CFAP47/DNAH9/DNAH3
GO:0099111	BP	microtubule-based transport	0.171429	1.7152e-09	12	TUBA1A/DNAAF1/CFAP43/ODAD3/NEK10/MAP1A/RSPH4A/CFAP54/ROPN1L/DNAI1/SPAG17/DNAH9
GO:0003351	BP	epithelial cilium movement involved in extracellular fluid movement	0.142857	5.4858e-14	10	DNAAF1/CFAP43/ODAD3/NEK10/RSPH4A/CFAP54/ROPN1L/DNAI1/SPAG17/DNAH9
GO:0006858	BP	extracellular transport	0.142857	1.0406e-13	10	DNAAF1/CFAP43/ODAD3/NEK10/RSPH4A/CFAP54/ROPN1L/DNAI1/SPAG17/DNAH9
GO:0007389	BP	pattern specification process	0.142857	0.00041223	10	HES2/DNAAF1/AR/NKD1/ODAD3/CFAP52/EFNB1/DNAI1/ODAD2/DRC1
GO:0070286	BP	axonemal dynein complex assembly	0.128571	1.8238e-12	9	ZMYND10/DNAAF1/ODAD3/CCDC65/CFAP73/ODAD1/DNAI1/ODAD2/DRC1
GO:0007286		spermatid development	0.128571	3.7999e-06	9	CFAP43/RSPH1/RFX2/CFAP65/CFAP73/CFAP54/ROPN1L/CFAP47/SPAG17
GO:0048515		spermatid differentiation	0.128571	5.0148e-06	9	CFAP43/RSPH1/RFX2/CFAP65/CFAP73/CFAP54/ROPN1L/CFAP47/SPAG17
GO:0007281		germ cell development	0.128571	0.0003237	9	CFAP43/RSPH1/RFX2/CFAP65/CFAP73/CFAP54/ROPN1L/CFAP47/SPAG17
GO:0003002		regionalization	0.128571	0.00098648	9	HES2/DNAAF1/AR/NKD1/ODAD3/CFAP52/DNAI1/ODAD2/DRC1
GO:0022412		cellular process involved in reproduction in multicellular organism	0.128571	0.00183331	9	CFAP43/RSPH1/RFX2/CFAP65/CFAP73/CFAP54/ROPN1L/CFAP47/SPAG17
GO:0030317		flagellated sperm motility	0.114286	2.1334e-06	8	CFAP43/ODAD3/CFAP65/CFAP54/CFAP52/ROPN1L/DNAI1/CFAP47
GO:0097722		sperm motility	0.114286	2.1334e-06	8	CFAP43/ODAD3/CFAP65/CFAP54/CFAP52/ROPN1L/DNAI1/CFAP47
GO:0032886		regulation of microtubule-based process	0.114286	0.00024311	8	DNAAF1/CFAP43/CCDC65/MAP1A/SPEF1/RSPH4A/ODAD2/DRC1
GO:0044458	BP	motile cilium assembly	0.1	3.4862e-07	7	ZMYND10/DNAAF1/CFAP43/CFAP65/CFAP54/CFAP47/SPAG17
GO:0036158	BP	outer dynein arm assembly	0.0857143	2.1459e-08	6	ZMYND10/DNAAF1/ODAD3/ODAD1/DNAI1/ODAD2
GO:0003352		regulation of cilium movement	0.0857143	5.111e-07	6	DNAAF1/CFAP43/CCDC65/RSPH4A/ODAD2/DRC1
GO:0060632		regulation of microtubule-based movement	0.0857143	3.1118e-06	6	DNAAF1/CFAP43/CCDC65/RSPH4A/ODAD2/DRC1
GO:0007368		determination of left/right symmetry	0.0857143	0.00041281	6	DNAAF1/ODAD3/CFAP52/DNAI1/ODAD2/DRC1
GO:0060972		left/right pattern formation	0.0857143	0.00050182	6	DNAAF1/ODAD3/CFAP52/DNAI1/ODAD2/DRC1
GO:0009799		specification of symmetry	0.0857143	0.00054395	6	DNAAF1/ODAD3/CFAP52/DNAI1/ODAD2/DRC1
GO:0009855		determination of bilateral symmetry	0.0857143	0.00054395	6	DNAAF1/ODAD3/CFAP52/DNAI1/ODAD2/DRC1
GO:0007585		respiratory gaseous exchange by respiratory system	0.0714286	0.00036081	5	CFAP43/NEK10/GRPR/CFAP54/DNAH9
GO:0090660		cerebrospinal fluid circulation	0.0571429	1.174e-05	4	CFAP43/ODAD3/CFAP54/DNAH9
GO:0003016		respiratory system process	0.0571429	0.00050182	4	CFAP43/NEK10/CFAP54/DNAH9
GO:0120316		sperm flagellum assembly	0.0571429	0.00055681	4	CFAP43/CFAP65/CFAP54/CFAP47
GO:0022612		gland morphogenesis	0.0571429	0.0293616	4	SERPINB5/MMP2/AR/GDF7
GO:0003356		regulation of cilium beat frequency	0.0428571	0.00102853	3	DNAAF1/CFAP43/ODAD2
GO:0036159		inner dynein arm assembly	0.0428571	0.00102853	3	ZMYND10/DNAAF1/CFAP73
GO:0007288		sperm axoneme assembly	0.0428571	0.00443229	3	CFAP43/CFAP65/CFAP47
GO:0060512		prostate gland morphogenesis	0.0428571	0.00443229	3	SERPINB5/MMP2/AR
GO:0030850		prostate gland development	0.0428571	0.0243727	3	SERPINB5/MMP2/AR
GO:0001655		urogenital system development	0.0428571	0.0482832	3	SERPINB5/MMP2/AR
GO:0048853		forebrain morphogenesis	0.0285714	0.0282505	2	TUBA1A/GDF7
GO:0060287		epithelial cilium movement involved in determination of left/right asymmetry	0.0285714	0.0282505	2	DNAAF1/ODAD3
GO:0098840		protein transport along microtubule	0.0285714	0.0306382	2	MAP1A/SPAG17
GO:0099118		microtubule-based protein transport	0.0285714	0.0306382	2	MAP1A/SPAG17
GO:2000095		regulation of Wnt signaling pathway, planar cell polarity pathway	0.0285714	0.0393152	2	NKD1/SPEF1

## Sheet: UP_HivLo_GO
ID		Description	GeneRatio	p.adjust	Count	geneID
GO:0050673	BP	epithelial cell proliferation	0.25	0.00844309	5	GATA2/IGFBP3/VEGFA/NFIB/FUT2
GO:0030902	BP	hindbrain development	0.2	0.00529024	4	GATA2/NFIB/CBS/LOC102724560
GO:0003018	BP	vascular process in circulatory system	0.2	0.00990693	4	SLC7A8/VEGFA/CBS/LOC102724560
GO:0050678	BP	regulation of epithelial cell proliferation	0.2	0.0199674	4	GATA2/VEGFA/NFIB/FUT2
GO:0048732	BP	gland development	0.2	0.0219451	4	GATA2/PTPN3/VEGFA/NFIB
GO:0001503	BP	ossification	0.2	0.0219451	4	IGFBP3/ERFE/CBS/LOC102724560
GO:0010749	BP	regulation of nitric oxide mediated signal transduction	0.15	0.00017543	3	VEGFA/CBS/LOC102724560
GO:0007263	BP	nitric oxide mediated signal transduction	0.15	0.00159921	3	VEGFA/CBS/LOC102724560
GO:0071456	BP	cellular response to hypoxia	0.15	0.0177934	3	VEGFA/CBS/LOC102724560
GO:0036294	BP	cellular response to decreased oxygen levels	0.15	0.0179225	3	VEGFA/CBS/LOC102724560
GO:0061351	BP	neural precursor cell proliferation	0.15	0.0192141	3	GATA2/VEGFA/NFIB
GO:0071453	BP	cellular response to oxygen levels	0.15	0.0199674	3	VEGFA/CBS/LOC102724560
GO:0001936	BP	regulation of endothelial cell proliferation	0.15	0.0209523	3	GATA2/VEGFA/FUT2
GO:0007565	BP	female pregnancy	0.15	0.0219451	3	VEGFA/CBS/LOC102724560
GO:0006486	BP	protein glycosylation	0.15	0.0219451	3	MGAT4A/ST6GALNAC1/FUT2
GO:0043413		macromolecule glycosylation	0.15	0.0219451	3	MGAT4A/ST6GALNAC1/FUT2
GO:0001935		endothelial cell proliferation	0.15	0.0226	3	GATA2/VEGFA/FUT2
GO:0044703		multi-organism reproductive process	0.15	0.0230973	3	VEGFA/CBS/LOC102724560
GO:0051216		cartilage development	0.15	0.0230973	3	NFIB/CBS/LOC102724560
GO:0016051		carbohydrate biosynthetic process	0.15	0.0233218	3	ERFE/ST6GALNAC1/FUT2
GO:0044706		multi-multicellular organism process	0.15	0.0233218	3	VEGFA/CBS/LOC102724560
GO:0070085		glycosylation	0.15	0.0233218	3	MGAT4A/ST6GALNAC1/FUT2
GO:0019318		hexose metabolic process	0.15	0.0269522	3	IGFBP3/ERFE/FUT2
GO:0002573		myeloid leukocyte differentiation	0.15	0.0269522	3	GATA2/VEGFA/ERFE
GO:0005996		monosaccharide metabolic process	0.15	0.0327904	3	IGFBP3/ERFE/FUT2
GO:0001894		tissue homeostasis	0.15	0.0350604	3	GATA2/VEGFA/NFIB
GO:0060249		anatomical structure homeostasis	0.15	0.0350604	3	GATA2/VEGFA/NFIB
GO:0061448		connective tissue development	0.15	0.0359922	3	NFIB/CBS/LOC102724560
GO:0010721		negative regulation of cell development	0.15	0.0359922	3	GATA2/VEGFA/ERFE
GO:0001666		response to hypoxia	0.15	0.0383436	3	VEGFA/CBS/LOC102724560
GO:0009101		glycoprotein biosynthetic process	0.15	0.0383436	3	MGAT4A/ST6GALNAC1/FUT2
GO:0019932		second-messenger-mediated signaling	0.15	0.041104	3	VEGFA/CBS/LOC102724560
GO:0036293		response to decreased oxygen levels	0.15	0.0414113	3	VEGFA/CBS/LOC102724560
GO:0048872		homeostasis of number of cells	0.15	0.0414113	3	GATA2/VEGFA/ST6GALNAC1
GO:0070482		response to oxygen levels	0.15	0.0472353	3	VEGFA/CBS/LOC102724560
GO:0000098		sulfur amino acid catabolic process	0.1	0.00787902	2	CBS/LOC102724560
GO:0051593		response to folic acid	0.1	0.00787902	2	CBS/LOC102724560
GO:0006534		cysteine metabolic process	0.1	0.00787902	2	CBS/LOC102724560
GO:0071679		commissural neuron axon guidance	0.1	0.00787902	2	VEGFA/NFIB
GO:0006563		L-serine metabolic process	0.1	0.00814245	2	CBS/LOC102724560
GO:0050667		homocysteine metabolic process	0.1	0.00843865	2	CBS/LOC102724560
GO:0009071		serine family amino acid catabolic process	0.1	0.00844309	2	CBS/LOC102724560
GO:0000097		sulfur amino acid biosynthetic process	0.1	0.00944068	2	CBS/LOC102724560
GO:0009070		serine family amino acid biosynthetic process	0.1	0.0119883	2	CBS/LOC102724560
GO:0042219		cellular modified amino acid catabolic process	0.1	0.0119883	2	CBS/LOC102724560
GO:1903589		positive regulation of blood vessel endothelial cell proliferation involved in sprouting angiogenesis	0.1	0.0119883	2	GATA2/VEGFA
GO:0061042		vascular wound healing	0.1	0.0123498	2	GATA2/VEGFA
GO:0035162		embryonic hemopoiesis	0.1	0.012716	2	GATA2/VEGFA
GO:0009312		oligosaccharide biosynthetic process	0.1	0.0176647	2	ST6GALNAC1/FUT2
GO:0001958		endochondral ossification	0.1	0.0177934	2	CBS/LOC102724560
GO:0036075		replacement ossification	0.1	0.0177934	2	CBS/LOC102724560
GO:0060055		angiogenesis involved in wound healing	0.1	0.0177934	2	GATA2/VEGFA
GO:0000096		sulfur amino acid metabolic process	0.1	0.0179225	2	CBS/LOC102724560
GO:0060351		cartilage development involved in endochondral bone morphogenesis	0.1	0.0179225	2	CBS/LOC102724560
GO:0090050		positive regulation of cell migration involved in sprouting angiogenesis	0.1	0.0181481	2	GATA2/VEGFA
GO:0044273		sulfur compound catabolic process	0.1	0.0199254	2	CBS/LOC102724560
GO:0009069		serine family amino acid metabolic process	0.1	0.0200098	2	CBS/LOC102724560
GO:0021587		cerebellum morphogenesis	0.1	0.0219451	2	CBS/LOC102724560
GO:0021575		hindbrain morphogenesis	0.1	0.0220868	2	CBS/LOC102724560
GO:1903587		regulation of blood vessel endothelial cell proliferation involved in sprouting angiogenesis	0.1	0.0224707	2	GATA2/VEGFA
GO:0001974		blood vessel remodeling	0.1	0.0230973	2	CBS/LOC102724560
GO:0002762		negative regulation of myeloid leukocyte differentiation	0.1	0.0233218	2	GATA2/ERFE
GO:1902692		regulation of neuroblast proliferation	0.1	0.0233218	2	GATA2/VEGFA
GO:0002043		blood vessel endothelial cell proliferation involved in sprouting angiogenesis	0.1	0.0236765	2	GATA2/VEGFA
GO:0060135		maternal process involved in female pregnancy	0.1	0.0266873	2	CBS/LOC102724560
GO:0060350		endochondral bone morphogenesis	0.1	0.0269522	2	CBS/LOC102724560
GO:0030225		macrophage differentiation	0.1	0.029106	2	GATA2/VEGFA
GO:1901607		alpha-amino acid biosynthetic process	0.1	0.0327904	2	CBS/LOC102724560
GO:0009311		oligosaccharide metabolic process	0.1	0.0327904	2	ST6GALNAC1/FUT2
GO:1902893		regulation of miRNA transcription	0.1	0.0327904	2	GATA2/NFIB
GO:0061614		miRNA transcription	0.1	0.0327904	2	GATA2/NFIB
GO:0006801		superoxide metabolic process	0.1	0.03301	2	CBS/LOC102724560
GO:0002067		glandular epithelial cell differentiation	0.1	0.03301	2	GATA2/NFIB
GO:0048663		neuron fate commitment	0.1	0.03301	2	GATA2/NFIB
GO:0043536		positive regulation of blood vessel endothelial cell migration	0.1	0.0350604	2	GATA2/VEGFA
GO:0008652		amino acid biosynthetic process	0.1	0.0350604	2	CBS/LOC102724560
GO:0090049		regulation of cell migration involved in sprouting angiogenesis	0.1	0.0359922	2	GATA2/VEGFA
GO:0007405		neuroblast proliferation	0.1	0.0359922	2	GATA2/VEGFA
GO:0033273		response to vitamin	0.1	0.0383436	2	CBS/LOC102724560
GO:2000628		regulation of miRNA metabolic process	0.1	0.0383436	2	GATA2/NFIB
GO:0021954		central nervous system neuron development	0.1	0.0404711	2	GATA2/NFIB
GO:0140747		regulation of ncRNA transcription	0.1	0.0414113	2	GATA2/NFIB
GO:1901606		alpha-amino acid catabolic process	0.1	0.0414113	2	CBS/LOC102724560
GO:0045638		negative regulation of myeloid cell differentiation	0.1	0.0426466	2	GATA2/ERFE
GO:0002042		cell migration involved in sprouting angiogenesis	0.1	0.0430082	2	GATA2/VEGFA
GO:0060349		bone morphogenesis	0.1	0.0454854	2	CBS/LOC102724560
GO:2000177		regulation of neural precursor cell proliferation	0.1	0.0454854	2	GATA2/VEGFA
GO:0120162		positive regulation of cold-induced thermogenesis	0.1	0.0458418	2	VEGFA/LCN2
GO:0010906		regulation of glucose metabolic process	0.1	0.047083	2	IGFBP3/ERFE
GO:0021549		cerebellum development	0.1	0.0472353	2	CBS/LOC102724560
GO:0010586		miRNA metabolic process	0.1	0.0472651	2	GATA2/NFIB
