# Supplementary material for: Endometrial cells with high ALDH activity contribute to uterine development and regeneration
Source: Research Square preprint supplement (doi:10.21203/rs.3.rs-6831916/v3), 2026-05-26
Supplement: Supplementary file 4 [file e353d735153c6e4c2d8fd7be.xlsx]

## Sheet: Sheet1
Patient	Sample type	RNAseq ID	Patient Age	Pathology Report + Clinical Diagnosis (if available)	Endometriosis Stage (if available)	Stage	Hormones in the past 3 months	Figure/Experiment Used in
1	Eutopic endometrium	EM5, EH6	43	Weakly proliferative endometrium, endometriosis	4			ALDEFLUOR assay, RNA Seq, Formation Assay
2	Eutopic endometrium	EL1, EH2	39	Ovarian fossa, peritoneal and rectal endometriosis	3	unknown	None	ALDEFLUOR assay, RNA Seq, Formation Assay	127
3	Eutopic endometrium	EL3, EH4	34	Proliferative endometrium, endometrioma + endometriosis	1	secretory	None	ALDEFLUOR assay, RNA Seq	129
		RNA Seq:
		L/M = ALDH Low from ALDEFLUOR
		H = ALDH High from ALDEFLUOR
